# Supplementary material for: Perirenal adipose tissue contains a subpopulation of cold-inducible adipocytes derived from brown-to-white conversion
Source: eLife. 2024 Mar 12;13:RP93151. doi: 10.7554/eLife.93151 (PMC10932542; doi:10.7554/eLife.93151)
Supplement: Supplementary file 1. [file elife-93151-supp1.xlsx]

## Sheet: mPRAT
	p_val	avg_log2FC	pct.1	pct.2	p_val_adj	cluster	gene
Gpc6	0	4.94403	0.914	0.017	0	ASPC	Gpc6
Arhgap6	0	4.59156	0.94	0.049	0	ASPC	Arhgap6
Lama2	0	4.54169	0.907	0.006	0	ASPC	Lama2
Thsd7a	0	4.38481	0.818	0.018	0	ASPC	Thsd7a
Tmeff2	0	4.29489	0.873	0.013	0	ASPC	Tmeff2
Egfr	0	4.25517	0.916	0.11	0	ASPC	Egfr
Dcn	0	3.88666	0.844	0.015	0	ASPC	Dcn
Plxdc2	0	3.83856	0.881	0.098	0	ASPC	Plxdc2
Bicc1	0	3.7978	0.897	0.024	0	ASPC	Bicc1
Scara5	0	3.73386	0.826	0.013	0	ASPC	Scara5
Meg3	0	3.70932	0.815	0.018	0	ASPC	Meg3
Sntg1	0	3.66332	0.43	0.011	0	ASPC	Sntg1
Sdk1	0	3.65262	0.74	0.034	0	ASPC	Sdk1
Creb5	0	3.58618	0.648	0.026	0	ASPC	Creb5
Naaladl2	0	3.54843	0.881	0.099	0	ASPC	Naaladl2
Abca8a	0	3.52834	0.833	0.145	0	ASPC	Abca8a
Zfpm2	0	3.42057	0.882	0.101	0	ASPC	Zfpm2
Eya2	0	3.38522	0.795	0.015	0	ASPC	Eya2
Prkg1	0	3.31195	0.799	0.037	0	ASPC	Prkg1
Nova1	0	3.30833	0.7	0.049	0	ASPC	Nova1
Rbms3	0	3.22232	0.975	0.278	0	ASPC	Rbms3
Ddr2	0	3.1596	0.785	0.049	0	ASPC	Ddr2
Tshz2	0	3.146	0.981	0.345	0	ASPC	Tshz2
Fbn1	0	3.13878	0.664	0.015	0	ASPC	Fbn1
Gpc3	0	3.10014	0.662	0.01	0	ASPC	Gpc3
Kcnt2	0	3.06673	0.707	0.013	0	ASPC	Kcnt2
Magi2	0	3.04928	0.704	0.085	0	ASPC	Magi2
Cp	0	2.92368	0.695	0.083	0	ASPC	Cp
Opcml	0	2.90077	0.289	0.007	0	ASPC	Opcml
Dpep1	0	2.89208	0.701	0.019	0	ASPC	Dpep1
Ltbp1	0	2.8861	0.688	0.014	0	ASPC	Ltbp1
Pcdh9	0	2.88399	0.325	0.009	0	ASPC	Pcdh9
Csmd1	0	2.84729	0.374	0.008	0	ASPC	Csmd1
Rhoj	0	2.83434	0.679	0.032	0	ASPC	Rhoj
Ccbe1	0	2.81203	0.562	0.034	0	ASPC	Ccbe1
Aff2	0	2.80339	0.579	0.034	0	ASPC	Aff2
Zfp521	0	2.78394	0.71	0.039	0	ASPC	Zfp521
Gsn	0	2.77569	0.795	0.237	0	ASPC	Gsn
Tnxb	0	2.77506	0.742	0.016	0	ASPC	Tnxb
Ror1	0	2.76931	0.655	0.022	0	ASPC	Ror1
Nav3	0	2.76387	0.795	0.233	0	ASPC	Nav3
Col3a1	0	2.75471	0.695	0.051	0	ASPC	Col3a1
Adamtsl1	0	2.71115	0.696	0.016	0	ASPC	Adamtsl1
Adamts5	0	2.69736	0.575	0.09	0	ASPC	Adamts5
Chrm3	0	2.67089	0.467	0.012	0	ASPC	Chrm3
Antxr1	0	2.63317	0.651	0.013	0	ASPC	Antxr1
C7	0	2.623	0.253	0.004	0	ASPC	C7
Gli3	0	2.61312	0.682	0.018	0	ASPC	Gli3
Adamts12	0	2.58115	0.873	0.348	0	ASPC	Adamts12
Frmd6	0	2.56806	0.638	0.019	0	ASPC	Frmd6
Col1a2	0	2.54065	0.642	0.019	0	ASPC	Col1a2
Col6a6	0	2.53305	0.523	0.004	0	ASPC	Col6a6
B3galt1	0	2.47052	0.736	0.134	0	ASPC	B3galt1
Col5a2	0	2.46119	0.656	0.075	0	ASPC	Col5a2
Glis3	0	2.45655	0.575	0.02	0	ASPC	Glis3
Col15a1	0	2.45627	0.501	0.067	0	ASPC	Col15a1
Fap	0	2.43995	0.518	0.037	0	ASPC	Fap
Lvrn	0	2.42889	0.479	0.007	0	ASPC	Lvrn
Fbxl7	0	2.42787	0.637	0.064	0	ASPC	Fbxl7
Pdgfra	0	2.40546	0.608	0.005	0	ASPC	Pdgfra
Pde3a	0	2.37202	0.738	0.137	0	ASPC	Pde3a
Dchs2	0	2.34406	0.473	0.004	0	ASPC	Dchs2
Sema3c	0	2.34006	0.362	0.031	0	ASPC	Sema3c
Fstl1	0	2.33169	0.559	0.021	0	ASPC	Fstl1
Rian	0	2.32424	0.493	0.007	0	ASPC	Rian
Prrx1	0	2.31953	0.605	0.056	0	ASPC	Prrx1
Adamts2	0	2.31122	0.581	0.043	0	ASPC	Adamts2
Srgap1	0	2.29606	0.496	0.053	0	ASPC	Srgap1
Errfi1	0	2.29339	0.496	0.073	0	ASPC	Errfi1
Il1r1	0	2.25226	0.593	0.036	0	ASPC	Il1r1
Trerf1	0	2.24977	0.74	0.07	0	ASPC	Trerf1
Col5a1	0	2.21904	0.611	0.039	0	ASPC	Col5a1
Antxr2	0	2.21713	0.686	0.161	0	ASPC	Antxr2
Gpm6b	0	2.20467	0.477	0.01	0	ASPC	Gpm6b
Gucy1a2	0	2.19758	0.505	0.011	0	ASPC	Gucy1a2
Nid1	0	2.1842	0.645	0.109	0	ASPC	Nid1
Abca8b	0	2.1674	0.464	0.016	0	ASPC	Abca8b
Abca6	0	2.16497	0.481	0.007	0	ASPC	Abca6
Tmtc1	0	2.16173	0.533	0.039	0	ASPC	Tmtc1
Adgrd1	0	2.16145	0.455	0.01	0	ASPC	Adgrd1
Sned1	0	2.10971	0.512	0.041	0	ASPC	Sned1
Gria4	0	2.08956	0.262	0.005	0	ASPC	Gria4
Spon1	0	2.08902	0.326	0.01	0	ASPC	Spon1
Col6a3	0	2.06786	0.553	0.037	0	ASPC	Col6a3
Nav1	0	2.05195	0.767	0.191	0	ASPC	Nav1
Lhfp	0	2.05193	0.523	0.05	0	ASPC	Lhfp
Vit	0	2.05007	0.452	0.004	0	ASPC	Vit
Gfpt2	0	2.04696	0.36	0.006	0	ASPC	Gfpt2
Mcc	0	2.04552	0.586	0.045	0	ASPC	Mcc
Fyn	0	2.03248	0.504	0.037	0	ASPC	Fyn
Stxbp6	0	2.02953	0.54	0.058	0	ASPC	Stxbp6
Aldh1a1	0	2.02043	0.625	0.106	0	ASPC	Aldh1a1
Arhgap10	0	2.01941	0.704	0.143	0	ASPC	Arhgap10
Dclk1	0	2.01913	0.512	0.012	0	ASPC	Dclk1
Man1a	0	1.99808	0.641	0.13	0	ASPC	Man1a
Slc43a3	0	1.99343	0.537	0.028	0	ASPC	Slc43a3
Pknox2	0	1.98899	0.442	0.01	0	ASPC	Pknox2
Col14a1	0	1.98496	0.353	0.011	0	ASPC	Col14a1
Smoc2	0	1.98105	0.36	0.004	0	ASPC	Smoc2
Colec12	0	1.96962	0.53	0.07	0	ASPC	Colec12
Klf12	0	1.96951	0.51	0.025	0	ASPC	Klf12
Nckap5	0	1.95129	0.475	0.054	0	ASPC	Nckap5
Gask1b	0	1.9399	0.445	0.007	0	ASPC	Gask1b
Galnt17	0	1.93905	0.314	0.003	0	ASPC	Galnt17
Fndc1	0	1.92909	0.288	0.005	0	ASPC	Fndc1
Celf2	0	1.91111	0.993	0.896	0	ASPC	Celf2
Pcdh19	0	1.90885	0.356	0.008	0	ASPC	Pcdh19
Ifi207	0	1.90869	0.516	0.023	0	ASPC	Ifi207
Runx1t1	0	1.88132	0.44	0.014	0	ASPC	Runx1t1
Eps8	0	1.8731	0.549	0.051	0	ASPC	Eps8
Pappa	0	1.863	0.293	0.005	0	ASPC	Pappa
Robo1	0	1.85525	0.263	0.01	0	ASPC	Robo1
Rcan2	0	1.8527	0.325	0.01	0	ASPC	Rcan2
Sulf1	0	1.84642	0.592	0.043	0	ASPC	Sulf1
Ntn1	0	1.81492	0.405	0.048	0	ASPC	Ntn1
Aox3	0	1.80767	0.364	0.001	0	ASPC	Aox3
Lpar1	0	1.79608	0.477	0.015	0	ASPC	Lpar1
Nhs	0	1.79476	0.256	0.007	0	ASPC	Nhs
Osmr	0	1.79446	0.44	0.045	0	ASPC	Osmr
Mrc2	0	1.79377	0.432	0.03	0	ASPC	Mrc2
Hdac7	0	1.7896	0.489	0.029	0	ASPC	Hdac7
Arhgap28	0	1.77231	0.467	0.032	0	ASPC	Arhgap28
Ank3	0	1.75871	0.327	0.025	0	ASPC	Ank3
Boc	0	1.75204	0.456	0.039	0	ASPC	Boc
Adam19	0	1.7383	0.474	0.03	0	ASPC	Adam19
Tshz3	0	1.73526	0.445	0.032	0	ASPC	Tshz3
Gas7	0	1.7329	0.392	0.037	0	ASPC	Gas7
Wipf1	0	1.72889	0.582	0.072	0	ASPC	Wipf1
Map1b	0	1.72308	0.348	0.013	0	ASPC	Map1b
Flrt2	0	1.71986	0.373	0.017	0	ASPC	Flrt2
2023-09-11	0	1.71475	0.475	0.052	0	ASPC	2023-09-11
Apbb1ip	0	1.71342	0.471	0.039	0	ASPC	Apbb1ip
Dennd2a	0	1.70853	0.495	0.051	0	ASPC	Dennd2a
Akt3	0	1.70611	0.612	0.071	0	ASPC	Akt3
Ngf	0	1.69878	0.327	0.006	0	ASPC	Ngf
Plekhh2	0	1.68537	0.442	0.015	0	ASPC	Plekhh2
Prdm5	0	1.66115	0.425	0.016	0	ASPC	Prdm5
Pla2r1	0	1.65309	0.44	0.017	0	ASPC	Pla2r1
Col1a1	0	1.65138	0.415	0.005	0	ASPC	Col1a1
Gabra3	0	1.64819	0.29	0.006	0	ASPC	Gabra3
Inmt	0	1.64492	0.329	0.002	0	ASPC	Inmt
Axl	0	1.61785	0.442	0.017	0	ASPC	Axl
Medag	0	1.61768	0.395	0.014	0	ASPC	Medag
Slco3a1	0	1.60849	0.371	0.032	0	ASPC	Slco3a1
Mill2	0	1.60425	0.484	0.057	0	ASPC	Mill2
Astn2	0	1.5936	0.289	0.015	0	ASPC	Astn2
Phldb2	0	1.57957	0.407	0.023	0	ASPC	Phldb2
Pld1	0	1.57462	0.459	0.046	0	ASPC	Pld1
Arhgap20	0	1.56768	0.338	0.008	0	ASPC	Arhgap20
Akap12	0	1.56519	0.405	0.026	0	ASPC	Akap12
Nox4	0	1.5396	0.296	0.003	0	ASPC	Nox4
Timp2	0	1.52851	0.397	0.027	0	ASPC	Timp2
Cacna1a	0	1.526	0.429	0.04	0	ASPC	Cacna1a
Ifi204	0	1.52259	0.378	0.014	0	ASPC	Ifi204
Atp8b1	0	1.49997	0.367	0.027	0	ASPC	Atp8b1
Vgll3	0	1.48896	0.288	0.012	0	ASPC	Vgll3
Ogn	0	1.47714	0.355	0.004	0	ASPC	Ogn
Sobp	0	1.45755	0.305	0.005	0	ASPC	Sobp
Asap3	0	1.4521	0.359	0.015	0	ASPC	Asap3
Adam23	0	1.45119	0.351	0.023	0	ASPC	Adam23
Tox	0	1.42471	0.264	0.014	0	ASPC	Tox
Ms4a4d	0	1.42345	0.363	0.002	0	ASPC	Ms4a4d
2023-09-08	0	1.4227	0.416	0.02	0	ASPC	2023-09-08
Frmd4b	0	1.41803	0.56	0.082	0	ASPC	Frmd4b
Ldb2	0	1.40575	0.41	0.034	0	ASPC	Ldb2
Tek	0	1.38243	0.347	0.022	0	ASPC	Tek
Reps2	0	1.37033	0.377	0.029	0	ASPC	Reps2
Ptpn13	0	1.36908	0.408	0.027	0	ASPC	Ptpn13
Stard9	0	1.33311	0.411	0.041	0	ASPC	Stard9
Slfn5	0	1.33303	0.377	0.029	0	ASPC	Slfn5
Clec3b	0	1.32395	0.308	0.002	0	ASPC	Clec3b
Abca9	0	1.3218	0.418	0.029	0	ASPC	Abca9
Nhsl1	0	1.32005	0.292	0.019	0	ASPC	Nhsl1
Nxpe4	0	1.31316	0.329	0.026	0	ASPC	Nxpe4
Col6a1	0	1.3087	0.351	0.015	0	ASPC	Col6a1
Sh3rf3	0	1.30794	0.271	0.01	0	ASPC	Sh3rf3
Tpst1	0	1.28796	0.355	0.024	0	ASPC	Tpst1
Fst	0	1.2855	0.264	0.006	0	ASPC	Fst
Mfap5	0	1.27764	0.286	0.002	0	ASPC	Mfap5
Pla1a	0	1.26266	0.259	0.003	0	ASPC	Pla1a
Zc3h12b	0	1.26249	0.289	0.015	0	ASPC	Zc3h12b
Gm10115	0	1.26174	0.337	0.029	0	ASPC	Gm10115
Serping1	0	1.25607	0.338	0.01	0	ASPC	Serping1
Col4a4	0	1.25263	0.286	0.008	0	ASPC	Col4a4
Dnm1	0	1.24321	0.323	0.008	0	ASPC	Dnm1
Plekha6	0	1.21714	0.264	0.015	0	ASPC	Plekha6
Lsp1	0	1.20853	0.293	0.015	0	ASPC	Lsp1
Fgf7	0	1.19904	0.253	0.004	0	ASPC	Fgf7
Cd34	0	1.13917	0.259	0.009	0	ASPC	Cd34
Bmp1	0	1.13458	0.286	0.011	0	ASPC	Bmp1
Pdgfrb	0	1.10678	0.255	0.009	0	ASPC	Pdgfrb
Plod2	0	1.07833	0.299	0.018	0	ASPC	Plod2
Mmp14	0	1.0498	0.256	0.008	0	ASPC	Mmp14
Bicd1	0	1.02279	0.271	0.016	0	ASPC	Bicd1
Col6a2	0	0.984945	0.262	0.007	0	ASPC	Col6a2
Slit3	1.1259e-304	2.25268	0.968	0.469	2.29165e-300	ASPC	Slit3
Tspan5	4.87688e-303	2.10189	0.614	0.129	9.92639e-299	ASPC	Tspan5
Igf1r	1.29322e-301	1.86806	0.785	0.215	2.63221e-297	ASPC	Igf1r
Grb10	1.78848e-301	1.83626	0.577	0.109	3.64026e-297	ASPC	Grb10
Apbb2	5.6856e-298	1.8027	0.69	0.168	1.15725e-293	ASPC	Apbb2
Sh3d19	1.25925e-296	1.9197	0.663	0.163	2.56308e-292	ASPC	Sh3d19
Eml1	3.10399e-296	0.986193	0.262	0.016	6.31786e-292	ASPC	Eml1
Pear1	7.35757e-295	1.10785	0.256	0.015	1.49756e-290	ASPC	Pear1
Adamtsl3	9.46839e-295	1.93818	0.478	0.071	1.9272e-290	ASPC	Adamtsl3
C1s1	1.58545e-293	1.3114	0.375	0.042	3.22702e-289	ASPC	C1s1
Frmd4a	9.03033e-292	1.37351	0.377	0.041	1.83803e-287	ASPC	Frmd4a
Maml2	9.51946e-288	1.96281	0.9	0.371	1.93759e-283	ASPC	Maml2
Sec24d	9.78402e-288	1.73354	0.578	0.119	1.99144e-283	ASPC	Sec24d
Arhgef10l	3.39092e-286	0.905291	0.26	0.017	6.90187e-282	ASPC	Arhgef10l
Pcdh7	3.23594e-284	2.05804	0.723	0.194	6.58643e-280	ASPC	Pcdh7
Plpp3	8.44473e-284	2.54212	0.821	0.296	1.71884e-279	ASPC	Plpp3
Auts2	1.87498e-283	1.99844	0.812	0.239	3.81634e-279	ASPC	Auts2
Mir99ahg	3.18678e-280	1.94277	0.977	0.722	6.48637e-276	ASPC	Mir99ahg
Mast4	7.99985e-276	2.06408	0.81	0.286	1.62829e-271	ASPC	Mast4
Thsd4	1.07999e-275	1.50536	0.264	0.018	2.19821e-271	ASPC	Thsd4
Tnik	4.2717e-272	1.31443	0.282	0.023	8.69463e-268	ASPC	Tnik
Scn7a	5.51509e-271	1.86875	0.711	0.201	1.12254e-266	ASPC	Scn7a
Clmp	1.12017e-270	1.53432	0.395	0.052	2.27999e-266	ASPC	Clmp
Fndc3b	1.37374e-269	1.85091	0.901	0.447	2.7961e-265	ASPC	Fndc3b
Dpysl3	1.12761e-264	1.26633	0.288	0.025	2.29513e-260	ASPC	Dpysl3
Ggt5	3.42143e-261	1.18983	0.275	0.023	6.96397e-257	ASPC	Ggt5
Itga9	2.40999e-260	1.11149	0.299	0.027	4.90529e-256	ASPC	Itga9
Tcf7l1	3.39973e-255	2.02953	0.803	0.292	6.9198e-251	ASPC	Tcf7l1
Fam114a1	4.19402e-251	1.34806	0.405	0.061	8.5365e-247	ASPC	Fam114a1
Cyth3	1.36151e-250	1.85273	0.571	0.133	2.77122e-246	ASPC	Cyth3
Kirrel	1.81216e-250	1.62899	0.648	0.165	3.68848e-246	ASPC	Kirrel
Cacna2d1	1.8806e-249	1.56431	0.438	0.072	3.82777e-245	ASPC	Cacna2d1
Mid1	8.84794e-249	2.09945	0.789	0.298	1.80091e-244	ASPC	Mid1
Mndal	1.51449e-247	1.16149	0.386	0.051	3.08259e-243	ASPC	Mndal
Elmo1	3.25727e-243	1.05628	0.495	0.082	6.62985e-239	ASPC	Elmo1
St5	1.26971e-241	1.66798	0.571	0.131	2.58436e-237	ASPC	St5
Cald1	3.99972e-240	1.35113	0.468	0.084	8.14103e-236	ASPC	Cald1
Hgf	1.58613e-237	1.95408	0.297	0.033	3.2284e-233	ASPC	Hgf
Dpp4	2.79017e-237	1.63035	0.262	0.023	5.67911e-233	ASPC	Dpp4
A4galt	6.82053e-237	1.01339	0.253	0.021	1.38825e-232	ASPC	A4galt
Csf1	1.12549e-234	0.974204	0.262	0.024	2.29082e-230	ASPC	Csf1
Man1c1	2.2007e-234	1.08407	0.353	0.045	4.47931e-230	ASPC	Man1c1
Rgl1	3.47878e-232	1.46791	0.612	0.158	7.08071e-228	ASPC	Rgl1
Sp100	3.97074e-231	1.29256	0.421	0.067	8.08205e-227	ASPC	Sp100
1700025G04Rik	2.05887e-226	1.0885	0.29	0.03	4.19062e-222	ASPC	1700025G04Rik
Cfh	1.33344e-225	1.62112	0.448	0.079	2.71409e-221	ASPC	Cfh
Col5a3	1.01188e-224	1.38264	0.336	0.045	2.05958e-220	ASPC	Col5a3
Bmper	4.94229e-224	2.67275	0.668	0.229	1.00595e-219	ASPC	Bmper
Sdc2	1.54632e-223	1.94516	0.512	0.117	3.14739e-219	ASPC	Sdc2
Ebf1	6.29831e-215	1.3931	0.993	0.898	1.28196e-210	ASPC	Ebf1
Pard3b	8.44218e-215	1.70598	0.901	0.526	1.71832e-210	ASPC	Pard3b
Aff3	7.46733e-212	1.53119	0.49	0.101	1.5199e-207	ASPC	Aff3
Myof	3.98899e-207	1.0045	0.286	0.033	8.11919e-203	ASPC	Myof
Sh3pxd2b	2.46937e-206	1.05207	0.301	0.038	5.02616e-202	ASPC	Sh3pxd2b
Fmo2	9.28821e-206	1.78998	0.307	0.04	1.89052e-201	ASPC	Fmo2
App	1.97364e-204	1.29178	0.663	0.197	4.01715e-200	ASPC	App
Psd3	4.6707e-203	1.2832	0.712	0.244	9.50675e-199	ASPC	Psd3
Vegfd	1.31901e-201	1.62038	0.464	0.104	2.68472e-197	ASPC	Vegfd
Dpysl2	9.30969e-200	0.903998	0.284	0.034	1.8949e-195	ASPC	Dpysl2
Sema6a	1.63869e-199	0.845686	0.307	0.039	3.33539e-195	ASPC	Sema6a
Rftn1	4.74933e-199	1.00435	0.364	0.056	9.66679e-195	ASPC	Rftn1
Lrrk1	2.42532e-198	1.1691	0.426	0.08	4.93649e-194	ASPC	Lrrk1
Maml3	1.08534e-197	1.79055	0.664	0.222	2.2091e-193	ASPC	Maml3
Srgap2	3.1461e-196	1.38524	0.719	0.258	6.40357e-192	ASPC	Srgap2
Coro2b	9.8481e-196	1.00081	0.284	0.035	2.00448e-191	ASPC	Coro2b
Lima1	5.56091e-194	1.57656	0.64	0.207	1.13187e-189	ASPC	Lima1
Loxl1	6.09907e-194	1.11668	0.3	0.041	1.24141e-189	ASPC	Loxl1
Klhl13	1.34449e-192	1.14567	0.271	0.033	2.73657e-188	ASPC	Klhl13
Gab2	1.78682e-192	1.60419	0.796	0.348	3.63689e-188	ASPC	Gab2
Dapk1	4.28132e-185	1.7128	0.805	0.37	8.7142e-181	ASPC	Dapk1
Ifi203	8.15069e-183	0.895703	0.274	0.034	1.65899e-178	ASPC	Ifi203
Ubtd2	2.22018e-180	1.19013	0.349	0.062	4.51895e-176	ASPC	Ubtd2
Plekhg1	2.34464e-179	1.0243	0.277	0.035	4.77227e-175	ASPC	Plekhg1
Crybg3	9.03657e-177	1.177	0.412	0.085	1.8393e-172	ASPC	Crybg3
Arhgap42	2.37435e-175	1.49446	0.596	0.186	4.83274e-171	ASPC	Arhgap42
Plcl1	1.23276e-172	1.68276	0.61	0.193	2.50915e-168	ASPC	Plcl1
Arhgef3	8.0457e-172	1.41985	0.568	0.168	1.63762e-167	ASPC	Arhgef3
Airn	2.0453e-171	1.48638	0.877	0.486	4.163e-167	ASPC	Airn
Cdc14a	4.98584e-170	1.3817	0.451	0.108	1.01482e-165	ASPC	Cdc14a
Dcbld2	2.2269e-169	1.23496	0.375	0.077	4.53264e-165	ASPC	Dcbld2
Peak1	2.46055e-169	1.58571	0.763	0.368	5.0082e-165	ASPC	Peak1
Cep112	9.83158e-169	1.45403	0.5	0.135	2.00112e-164	ASPC	Cep112
Meis1	9.98982e-169	1.63655	0.738	0.334	2.03333e-164	ASPC	Meis1
Ehbp1	1.08629e-164	1.58445	0.818	0.478	2.21103e-160	ASPC	Ehbp1
Csgalnact1	1.29695e-164	1.34299	0.39	0.082	2.63981e-160	ASPC	Csgalnact1
Apba1	2.2726e-164	1.05717	0.304	0.048	4.62564e-160	ASPC	Apba1
Sash1	1.44738e-163	1.36261	0.638	0.227	2.94599e-159	ASPC	Sash1
Ust	1.962e-163	1.86688	0.727	0.341	3.99346e-159	ASPC	Ust
Fkbp5	2.38485e-163	1.36614	0.736	0.279	4.85412e-159	ASPC	Fkbp5
St3gal2	1.59766e-162	0.995879	0.253	0.034	3.25187e-158	ASPC	St3gal2
Anxa3	1.93036e-161	1.18208	0.258	0.035	3.92906e-157	ASPC	Anxa3
Cpne8	6.34422e-160	1.33212	0.421	0.1	1.2913e-155	ASPC	Cpne8
Plekha5	6.35233e-160	1.60212	0.644	0.248	1.29295e-155	ASPC	Plekha5
Olfr1033	3.92548e-159	0.976939	0.455	0.108	7.98992e-155	ASPC	Olfr1033
Meis2	2.98063e-157	1.54238	0.793	0.413	6.06678e-153	ASPC	Meis2
Samd4	8.75297e-156	1.27237	0.474	0.126	1.78158e-151	ASPC	Samd4
Gli2	2.32919e-154	1.40359	0.379	0.085	4.74084e-150	ASPC	Gli2
Taok3	6.51848e-151	1.2289	0.534	0.163	1.32677e-146	ASPC	Taok3
Maf	4.42096e-150	1.34622	0.537	0.173	8.99842e-146	ASPC	Maf
Asap1	5.22312e-150	1.36481	0.848	0.512	1.06311e-145	ASPC	Asap1
Arhgap18	1.97015e-149	1.04936	0.426	0.099	4.01005e-145	ASPC	Arhgap18
Man2a1	4.95469e-147	1.8317	0.71	0.34	1.00848e-142	ASPC	Man2a1
Enox1	2.10356e-144	1.4005	0.423	0.111	4.28159e-140	ASPC	Enox1
Pbx1	4.40879e-144	1.34173	0.892	0.638	8.97365e-140	ASPC	Pbx1
Fam129a	4.44447e-144	1.36319	0.507	0.156	9.04628e-140	ASPC	Fam129a
Sparc	1.18214e-143	1.2394	0.51	0.16	2.40612e-139	ASPC	Sparc
Parp8	1.45386e-141	0.597589	0.326	0.06	2.95918e-137	ASPC	Parp8
Zbtb20	2.98725e-138	0.710442	0.997	0.986	6.08026e-134	ASPC	Zbtb20
Gulp1	1.98023e-137	1.21329	0.76	0.339	4.03056e-133	ASPC	Gulp1
Pam	2.98747e-137	1.23051	0.501	0.154	6.0807e-133	ASPC	Pam
Abi3bp	3.43961e-136	1.44665	0.612	0.241	7.00097e-132	ASPC	Abi3bp
Arhgef10	4.11283e-134	0.907067	0.271	0.049	8.37126e-130	ASPC	Arhgef10
Arhgap24	1.07933e-132	1.33547	0.949	0.804	2.19687e-128	ASPC	Arhgap24
Eif4g3	3.26993e-132	1.29215	0.747	0.38	6.65561e-128	ASPC	Eif4g3
Plekha2	1.16479e-131	0.954343	0.299	0.059	2.37081e-127	ASPC	Plekha2
Fmnl2	4.85868e-131	1.33954	0.756	0.372	9.88936e-127	ASPC	Fmnl2
Ank2	7.72448e-131	1.41439	0.812	0.448	1.57224e-126	ASPC	Ank2
Rbms1	1.83459e-130	1.19096	0.912	0.701	3.73412e-126	ASPC	Rbms1
Adamts10	3.30458e-129	1.11506	0.421	0.119	6.72614e-125	ASPC	Adamts10
Sntb2	6.2259e-127	1.31938	0.592	0.234	1.26722e-122	ASPC	Sntb2
Slc8a1	3.12081e-126	0.710803	0.347	0.074	6.35209e-122	ASPC	Slc8a1
Bcl2	3.4008e-124	1.42123	0.514	0.179	6.92198e-120	ASPC	Bcl2
Abi2	3.9154e-124	0.962609	0.268	0.051	7.96941e-120	ASPC	Abi2
Lamc1	9.5061e-124	1.4663	0.77	0.447	1.93487e-119	ASPC	Lamc1
Timp3	1.04676e-120	1.53277	0.389	0.105	2.13057e-116	ASPC	Timp3
Efemp1	1.29035e-120	1.6015	0.399	0.116	2.62637e-116	ASPC	Efemp1
Phactr1	7.04826e-120	1.07272	0.29	0.061	1.4346e-115	ASPC	Phactr1
Eya4	1.30625e-119	1.35328	0.671	0.31	2.65874e-115	ASPC	Eya4
Tspan9	1.65868e-113	1.03638	0.321	0.077	3.37607e-109	ASPC	Tspan9
Slco2b1	1.11867e-112	1.14276	0.353	0.091	2.27693e-108	ASPC	Slco2b1
Casp12	9.34586e-112	0.912297	0.29	0.065	1.90226e-107	ASPC	Casp12
Add3	6.43602e-111	1.22392	0.722	0.378	1.30999e-106	ASPC	Add3
Dlc1	2.38077e-110	1.00886	0.973	0.871	4.84582e-106	ASPC	Dlc1
Plcl2	6.72774e-110	0.968656	0.407	0.118	1.36936e-105	ASPC	Plcl2
Steap3	1.36633e-109	0.981313	0.355	0.094	2.78102e-105	ASPC	Steap3
Prickle1	7.8014e-109	1.52564	0.512	0.197	1.5879e-104	ASPC	Prickle1
Rassf2	1.22052e-108	0.876351	0.299	0.068	2.48425e-104	ASPC	Rassf2
Flna	6.13746e-108	0.863272	0.292	0.067	1.24922e-103	ASPC	Flna
Pir	5.7275e-106	0.964134	0.292	0.068	1.16578e-101	ASPC	Pir
Mir100hg	3.26947e-104	1.12839	0.815	0.516	6.65467e-100	ASPC	Mir100hg
Dse	1.27747e-103	0.915034	0.384	0.112	2.60015e-99	ASPC	Dse
Htra3	1.34464e-102	1.18022	0.464	0.167	2.73687e-98	ASPC	Htra3
Ptprj	1.84856e-102	0.658002	0.332	0.082	3.76255e-98	ASPC	Ptprj
Cdon	6.53362e-102	1.39022	0.421	0.143	1.32985e-97	ASPC	Cdon
Fam102b	6.81147e-102	0.871709	0.304	0.076	1.38641e-97	ASPC	Fam102b
Ksr1	4.39575e-101	1.23191	0.559	0.232	8.94711e-97	ASPC	Ksr1
1110051M20Rik	2.00428e-100	1.03636	0.303	0.077	4.0795e-96	ASPC	1110051M20Rik
Fam171a1	2.56248e-99	0.787229	0.26	0.057	5.21567e-95	ASPC	Fam171a1
Gm10125	4.69373e-99	1.08654	0.315	0.084	9.55361e-95	ASPC	Gm10125
Svil	2.05086e-98	1.12744	0.726	0.404	4.17431e-94	ASPC	Svil
Cdk14	2.30002e-98	0.995042	0.805	0.494	4.68145e-94	ASPC	Cdk14
Garnl3	1.84596e-97	1.17113	0.37	0.115	3.75726e-93	ASPC	Garnl3
Sptbn1	2.43648e-96	0.841192	0.93	0.719	4.95922e-92	ASPC	Sptbn1
Ext1	1.40769e-95	1.12741	0.911	0.731	2.86521e-91	ASPC	Ext1
Pid1	2.03148e-95	1.06268	0.766	0.463	4.13488e-91	ASPC	Pid1
Igfbp7	5.09292e-93	1.15982	0.396	0.126	1.03661e-88	ASPC	Igfbp7
Lrrk2	5.42332e-93	0.866602	0.319	0.09	1.10386e-88	ASPC	Lrrk2
Rora	1.41622e-90	0.892832	0.973	0.851	2.88257e-86	ASPC	Rora
Setbp1	5.84539e-90	1.23642	0.73	0.432	1.18977e-85	ASPC	Setbp1
Xdh	1.43916e-89	1.12379	0.678	0.362	2.92927e-85	ASPC	Xdh
Cped1	1.92907e-89	0.95628	0.912	0.728	3.92644e-85	ASPC	Cped1
Klhl29	9.25963e-89	0.95234	0.315	0.087	1.8847e-84	ASPC	Klhl29
Gls	7.15609e-88	1.00389	0.547	0.243	1.45655e-83	ASPC	Gls
Snx24	1.33381e-87	0.961295	0.412	0.141	2.71484e-83	ASPC	Snx24
Lifr	6.56178e-87	1.29499	0.622	0.332	1.33559e-82	ASPC	Lifr
Cd47	5.41387e-86	0.993142	0.467	0.19	1.10194e-81	ASPC	Cd47
Fam13c	1.55141e-85	0.907668	0.266	0.068	3.15774e-81	ASPC	Fam13c
Zeb1	1.90067e-80	0.983891	0.916	0.766	3.86862e-76	ASPC	Zeb1
Heg1	1.22181e-79	1.24917	0.744	0.498	2.48687e-75	ASPC	Heg1
Irak3	1.48302e-79	0.90859	0.327	0.104	3.01855e-75	ASPC	Irak3
Foxp2	2.77272e-78	1.42304	0.597	0.33	5.64359e-74	ASPC	Foxp2
Nr2f2	2.21711e-77	1.05187	0.282	0.082	4.51271e-73	ASPC	Nr2f2
Klf7	2.30363e-77	0.980953	0.412	0.158	4.6888e-73	ASPC	Klf7
Mcu	1.50901e-76	1.09584	0.545	0.26	3.07143e-72	ASPC	Mcu
Nbea	2.94479e-76	1.01526	0.588	0.297	5.99382e-72	ASPC	Nbea
Gm17167	3.53156e-75	1.0078	0.316	0.099	7.18814e-71	ASPC	Gm17167
Ppp1r2	9.1978e-75	1.12609	0.363	0.131	1.87212e-70	ASPC	Ppp1r2
Ackr3	1.05275e-74	0.959578	0.251	0.067	2.14277e-70	ASPC	Ackr3
Map4	8.17596e-74	0.969737	0.553	0.271	1.66414e-69	ASPC	Map4
Hdgfl3	2.11451e-73	0.790594	0.262	0.074	4.30388e-69	ASPC	Hdgfl3
Spred1	1.34309e-72	0.881154	0.455	0.195	2.73373e-68	ASPC	Spred1
Prickle2	3.81798e-72	0.792242	0.305	0.093	7.77112e-68	ASPC	Prickle2
Ccnd3	2.30909e-71	0.719211	0.34	0.109	4.69993e-67	ASPC	Ccnd3
Rhobtb3	5.5016e-71	0.784552	0.251	0.07	1.1198e-66	ASPC	Rhobtb3
Far1	6.69493e-71	0.732111	0.31	0.1	1.36269e-66	ASPC	Far1
Zcchc24	4.23754e-70	0.972989	0.537	0.265	8.62509e-66	ASPC	Zcchc24
Slc16a2	3.09898e-69	1.12638	0.377	0.143	6.30766e-65	ASPC	Slc16a2
Arhgap21	8.2166e-69	0.991297	0.615	0.354	1.67241e-64	ASPC	Arhgap21
Flnb	5.85613e-68	0.782012	0.341	0.119	1.19196e-63	ASPC	Flnb
Zfp36l1	1.45459e-67	0.774579	0.326	0.111	2.96068e-63	ASPC	Zfp36l1
Sh3rf1	4.43481e-67	1.02819	0.423	0.179	9.02662e-63	ASPC	Sh3rf1
Ammecr1	1.72805e-66	0.845003	0.285	0.092	3.51726e-62	ASPC	Ammecr1
Bach2	3.80565e-66	1.10333	0.351	0.129	7.74603e-62	ASPC	Bach2
Dock7	4.24338e-66	0.901981	0.588	0.328	8.63698e-62	ASPC	Dock7
Cyp27a1	1.40223e-65	0.801776	0.351	0.13	2.8541e-61	ASPC	Cyp27a1
Crppa	1.6625e-65	0.943855	0.285	0.092	3.38386e-61	ASPC	Crppa
Adarb1	1.92806e-65	0.848615	0.359	0.136	3.92438e-61	ASPC	Adarb1
Acvr2a	7.22904e-65	1.22863	0.538	0.299	1.4714e-60	ASPC	Acvr2a
Cntln	1.06578e-64	0.823059	0.318	0.112	2.16928e-60	ASPC	Cntln
Fgf10	4.65547e-64	1.44309	0.484	0.235	9.47574e-60	ASPC	Fgf10
2610035D17Rik	1.94424e-62	1.03932	0.356	0.138	3.95731e-58	ASPC	2610035D17Rik
Ncoa7	4.81318e-62	0.806886	0.523	0.253	9.79674e-58	ASPC	Ncoa7
Smad3	1.37386e-61	1.07406	0.586	0.329	2.79635e-57	ASPC	Smad3
Dip2c	3.45709e-61	0.842926	0.782	0.554	7.03655e-57	ASPC	Dip2c
Ece1	1.13767e-60	0.849496	0.425	0.186	2.3156e-56	ASPC	Ece1
P4ha1	1.48455e-60	0.81124	0.44	0.197	3.02166e-56	ASPC	P4ha1
Gk5	3.872e-60	0.714399	0.31	0.11	7.88106e-56	ASPC	Gk5
Tcaf1	6.11043e-60	0.695111	0.267	0.087	1.24372e-55	ASPC	Tcaf1
Stk3	2.98382e-59	0.804019	0.689	0.434	6.07326e-55	ASPC	Stk3
Gm16263	5.33096e-59	0.844213	0.258	0.085	1.08506e-54	ASPC	Gm16263
Svep1	8.93866e-59	0.890646	0.74	0.485	1.81937e-54	ASPC	Svep1
Plscr4	1.15701e-58	0.801706	0.334	0.131	2.35497e-54	ASPC	Plscr4
Acap2	1.28401e-57	0.856596	0.645	0.401	2.61347e-53	ASPC	Acap2
Pkd2	1.49921e-57	0.80116	0.451	0.217	3.0515e-53	ASPC	Pkd2
Slc44a1	5.25201e-57	0.994504	0.484	0.255	1.06899e-52	ASPC	Slc44a1
Disp1	1.88855e-56	0.76979	0.282	0.098	3.84395e-52	ASPC	Disp1
Prkca	3.15185e-56	1.04466	0.573	0.342	6.41527e-52	ASPC	Prkca
Nfib	3.57393e-56	0.685838	0.923	0.778	7.27437e-52	ASPC	Nfib
Samhd1	4.56747e-55	0.607917	0.288	0.1	9.29664e-51	ASPC	Samhd1
Tgfbr3	2.21733e-54	0.714024	0.868	0.678	4.51315e-50	ASPC	Tgfbr3
Bnc2	2.22364e-54	0.876679	0.526	0.275	4.526e-50	ASPC	Bnc2
Stag1	5.72676e-54	0.750025	0.79	0.606	1.16562e-49	ASPC	Stag1
Dlgap4	6.73499e-54	0.886528	0.467	0.241	1.37084e-49	ASPC	Dlgap4
Lrch1	8.33688e-54	0.732367	0.482	0.237	1.69689e-49	ASPC	Lrch1
Sgce	5.1519e-53	0.897843	0.353	0.151	1.04862e-48	ASPC	Sgce
Akap13	1.51958e-52	0.683923	0.855	0.699	3.09295e-48	ASPC	Akap13
Igfbp4	4.34985e-52	0.885908	0.319	0.131	8.85369e-48	ASPC	Igfbp4
C3	2.96759e-50	0.707894	0.271	0.097	6.04024e-46	ASPC	C3
Lpp	1.27085e-49	0.610392	0.87	0.698	2.58668e-45	ASPC	Lpp
Col4a1	1.46052e-49	1.12706	0.601	0.38	2.97274e-45	ASPC	Col4a1
Cask	2.02788e-49	0.785201	0.562	0.336	4.12755e-45	ASPC	Cask
Gm12216	2.0872e-49	0.837466	0.386	0.18	4.24829e-45	ASPC	Gm12216
Bbs9	2.79603e-49	0.809816	0.397	0.186	5.69105e-45	ASPC	Bbs9
Nin	4.79048e-49	0.656445	0.252	0.089	9.75053e-45	ASPC	Nin
Tanc2	7.83949e-49	0.356729	0.286	0.105	1.59565e-44	ASPC	Tanc2
Ppp2r3a	7.87604e-49	0.883471	0.634	0.421	1.60309e-44	ASPC	Ppp2r3a
Exoc6b	1.03283e-48	0.762982	0.695	0.494	2.10222e-44	ASPC	Exoc6b
Plce1	3.98357e-48	1.20839	0.529	0.331	8.10817e-44	ASPC	Plce1
Wsb1	4.30148e-48	0.649007	0.259	0.093	8.75523e-44	ASPC	Wsb1
Hspg2	4.32773e-48	0.793127	0.508	0.273	8.80866e-44	ASPC	Hspg2
Ttc28	4.33813e-48	0.737257	0.733	0.512	8.82982e-44	ASPC	Ttc28
Ptpn3	5.18532e-48	0.604034	0.266	0.097	1.05542e-43	ASPC	Ptpn3
Aig1	1.53995e-47	0.951157	0.359	0.162	3.13442e-43	ASPC	Aig1
Zeb2	1.66314e-47	0.505078	0.937	0.75	3.38516e-43	ASPC	Zeb2
Ebf2	2.15071e-47	0.849056	0.853	0.71	4.37755e-43	ASPC	Ebf2
Clcn5	1.2912e-46	0.692201	0.305	0.123	2.62811e-42	ASPC	Clcn5
Nfat5	3.5458e-46	0.699925	0.696	0.478	7.21712e-42	ASPC	Nfat5
Ftx	7.54396e-46	0.75725	0.322	0.14	1.5355e-41	ASPC	Ftx
Ssbp2	1.24839e-45	0.77752	0.681	0.475	2.54098e-41	ASPC	Ssbp2
Mitf	1.76557e-45	0.904424	0.61	0.395	3.59365e-41	ASPC	Mitf
Eda	4.98967e-45	0.947289	0.579	0.361	1.0156e-40	ASPC	Eda
Phf21a	7.03078e-45	0.65984	0.79	0.611	1.43104e-40	ASPC	Phf21a
Carmil1	8.77647e-45	0.756219	0.366	0.175	1.78636e-40	ASPC	Carmil1
Tmem178b	1.27109e-42	0.861847	0.263	0.104	2.58717e-38	ASPC	Tmem178b
Mapre2	2.25317e-41	0.64352	0.304	0.132	4.58611e-37	ASPC	Mapre2
Scmh1	2.85885e-41	0.811199	0.497	0.295	5.8189e-37	ASPC	Scmh1
Hoxc4	6.8572e-41	0.714849	0.27	0.112	1.39571e-36	ASPC	Hoxc4
Farp1	1.74517e-40	0.829771	0.425	0.23	3.55211e-36	ASPC	Farp1
Pdgfd	2.37551e-40	0.736376	0.547	0.322	4.83511e-36	ASPC	Pdgfd
Sbf2	2.4219e-40	0.634894	0.736	0.553	4.92954e-36	ASPC	Sbf2
Il6st	5.54759e-40	0.759735	0.453	0.258	1.12916e-35	ASPC	Il6st
Smurf2	1.51345e-39	0.931142	0.603	0.408	3.08047e-35	ASPC	Smurf2
Dock10	1.73584e-39	0.351106	0.374	0.176	3.53313e-35	ASPC	Dock10
Spred2	2.81244e-39	0.750029	0.444	0.241	5.72445e-35	ASPC	Spred2
Mpdz	6.62915e-38	0.664446	0.529	0.327	1.3493e-33	ASPC	Mpdz
Mecom	1.39978e-37	0.92106	0.341	0.168	2.84911e-33	ASPC	Mecom
Tcf4	1.56474e-37	0.685992	0.685	0.511	3.18488e-33	ASPC	Tcf4
Rab8b	1.90113e-37	0.48346	0.299	0.13	3.86956e-33	ASPC	Rab8b
Epb41l2	2.09952e-37	0.578587	0.773	0.574	4.27336e-33	ASPC	Epb41l2
E130307A14Rik	2.34295e-37	0.755136	0.353	0.176	4.76885e-33	ASPC	E130307A14Rik
Arhgap32	4.67674e-37	0.863011	0.575	0.394	9.51905e-33	ASPC	Arhgap32
Anapc5	7.18813e-37	0.635498	0.386	0.203	1.46307e-32	ASPC	Anapc5
Dnajc1	1.26794e-36	0.698733	0.641	0.457	2.58077e-32	ASPC	Dnajc1
Tut4	3.39305e-36	0.606584	0.501	0.298	6.90621e-32	ASPC	Tut4
Pds5b	7.26004e-36	0.66715	0.537	0.339	1.47771e-31	ASPC	Pds5b
Arl15	7.53975e-36	0.608658	0.855	0.717	1.53464e-31	ASPC	Arl15
Grk5	2.87582e-35	0.743098	0.551	0.355	5.85345e-31	ASPC	Grk5
Ttc3	5.13657e-35	0.66935	0.596	0.401	1.0455e-30	ASPC	Ttc3
Ube2e2	6.524e-35	0.581005	0.84	0.689	1.3279e-30	ASPC	Ube2e2
Fam172a	2.2554e-34	0.614968	0.773	0.607	4.59064e-30	ASPC	Fam172a
Tmem65	3.00297e-34	0.65398	0.459	0.275	6.11225e-30	ASPC	Tmem65
Palm	3.00585e-34	0.537272	0.288	0.13	6.1181e-30	ASPC	Palm
Setd7	5.61835e-34	0.612705	0.334	0.168	1.14356e-29	ASPC	Setd7
Kif13b	5.81313e-34	0.614989	0.59	0.4	1.18321e-29	ASPC	Kif13b
Phip	3.00206e-33	0.67821	0.592	0.404	6.11039e-29	ASPC	Phip
Atp2b1	4.53878e-33	0.53132	0.499	0.303	9.23823e-29	ASPC	Atp2b1
Eps15	4.94426e-33	0.577229	0.527	0.337	1.00635e-28	ASPC	Eps15
Nsmaf	1.24419e-32	0.58795	0.37	0.196	2.53243e-28	ASPC	Nsmaf
Snx18	2.7356e-32	0.572799	0.251	0.109	5.56804e-28	ASPC	Snx18
Mamld1	7.95615e-32	0.636465	0.301	0.145	1.61939e-27	ASPC	Mamld1
Spidr	1.27561e-31	0.647205	0.368	0.199	2.59637e-27	ASPC	Spidr
Crtc3	1.43011e-31	0.660148	0.47	0.297	2.91084e-27	ASPC	Crtc3
Map4k4	1.86514e-31	0.572309	0.641	0.454	3.7963e-27	ASPC	Map4k4
Spata6	2.27594e-31	0.599405	0.29	0.14	4.63244e-27	ASPC	Spata6
Tusc3	3.33895e-31	0.388273	0.26	0.113	6.7961e-27	ASPC	Tusc3
Jak1	5.59629e-31	0.686549	0.549	0.38	1.13907e-26	ASPC	Jak1
Klf9	7.98272e-31	0.724069	0.526	0.351	1.6248e-26	ASPC	Klf9
Invs	1.53982e-30	0.642711	0.274	0.13	3.13415e-26	ASPC	Invs
Cblb	2.18639e-30	0.4893	0.777	0.635	4.45018e-26	ASPC	Cblb
Tsc22d1	3.00374e-30	0.438689	0.312	0.15	6.1138e-26	ASPC	Tsc22d1
Cuedc1	3.42515e-30	0.575548	0.442	0.263	6.97156e-26	ASPC	Cuedc1
Fgfr1	3.95084e-30	0.576963	0.574	0.381	8.04155e-26	ASPC	Fgfr1
Myo9a	4.16154e-30	0.634351	0.521	0.345	8.4704e-26	ASPC	Myo9a
Daam1	4.76603e-30	0.742977	0.474	0.303	9.70078e-26	ASPC	Daam1
Sestd1	5.93644e-30	0.638004	0.371	0.21	1.2083e-25	ASPC	Sestd1
Ryk	1.05616e-29	0.546236	0.305	0.155	2.14971e-25	ASPC	Ryk
Dock1	1.11437e-29	0.55647	0.675	0.51	2.26818e-25	ASPC	Dock1
Gmds	1.24169e-29	0.73863	0.377	0.214	2.52734e-25	ASPC	Gmds
Hnrnph1	1.51998e-29	0.58302	0.662	0.499	3.09378e-25	ASPC	Hnrnph1
Rrbp1	1.67009e-29	0.602224	0.619	0.445	3.39931e-25	ASPC	Rrbp1
Smim14	3.38212e-29	0.608283	0.495	0.32	6.88397e-25	ASPC	Smim14
Dock4	3.56654e-29	0.832417	0.527	0.355	7.25934e-25	ASPC	Dock4
Zc3hav1	4.00819e-29	0.553025	0.316	0.161	8.15827e-25	ASPC	Zc3hav1
Ar	7.83348e-29	0.578177	0.512	0.32	1.59443e-24	ASPC	Ar
Cplane1	1.49676e-28	0.557898	0.334	0.18	3.0465e-24	ASPC	Cplane1
Kcnq1ot1	2.24765e-28	0.683561	0.641	0.476	4.57486e-24	ASPC	Kcnq1ot1
Pced1b	3.09352e-28	0.523327	0.3	0.151	6.29654e-24	ASPC	Pced1b
Prkd3	3.66496e-28	0.575507	0.279	0.138	7.45965e-24	ASPC	Prkd3
Wasf2	4.76891e-28	0.58724	0.51	0.34	9.70663e-24	ASPC	Wasf2
Cers6	5.71989e-28	0.363762	0.259	0.118	1.16423e-23	ASPC	Cers6
Mrtfa	1.07417e-27	0.60478	0.523	0.349	2.18636e-23	ASPC	Mrtfa
Arhgap35	1.1357e-27	0.638115	0.486	0.321	2.31161e-23	ASPC	Arhgap35
Phactr2	1.28057e-27	0.407746	0.252	0.118	2.60648e-23	ASPC	Phactr2
Calu	1.4892e-27	0.555811	0.332	0.18	3.03112e-23	ASPC	Calu
Stk39	2.28755e-27	0.540085	0.381	0.216	4.65608e-23	ASPC	Stk39
Myo9b	2.66531e-27	0.471133	0.323	0.171	5.42496e-23	ASPC	Myo9b
Ptpn12	3.83495e-27	0.616668	0.46	0.294	7.80565e-23	ASPC	Ptpn12
Ptpn9	8.49434e-27	0.593463	0.403	0.239	1.72894e-22	ASPC	Ptpn9
Dock11	9.88932e-27	0.540451	0.345	0.184	2.01287e-22	ASPC	Dock11
Dennd1b	2.50168e-26	0.526678	0.53	0.359	5.09191e-22	ASPC	Dennd1b
Camk1d	2.9782e-26	0.487589	0.793	0.671	6.06184e-22	ASPC	Camk1d
Tnpo1	3.25985e-26	0.550787	0.559	0.388	6.63509e-22	ASPC	Tnpo1
Rsu1	3.74511e-26	0.612853	0.527	0.36	7.6228e-22	ASPC	Rsu1
Sec31a	3.76888e-26	0.551817	0.486	0.324	7.67119e-22	ASPC	Sec31a
Eif2ak3	7.29982e-26	0.511508	0.296	0.156	1.4858e-21	ASPC	Eif2ak3
Ppfibp1	8.67261e-26	0.526731	0.425	0.261	1.76522e-21	ASPC	Ppfibp1
Pkd1	2.68795e-25	0.564485	0.447	0.284	5.47106e-21	ASPC	Pkd1
Lrp1	3.86674e-25	0.54915	0.579	0.416	7.87036e-21	ASPC	Lrp1
Hoxa3	4.14476e-25	0.569551	0.392	0.235	8.43625e-21	ASPC	Hoxa3
Spaca6	2.51703e-24	0.616667	0.358	0.209	5.12317e-20	ASPC	Spaca6
Rassf8	3.78842e-24	0.591552	0.326	0.186	7.71095e-20	ASPC	Rassf8
Chic2	1.08307e-23	0.558438	0.419	0.268	2.20448e-19	ASPC	Chic2
Sema5a	2.54491e-23	0.598445	0.353	0.206	5.17991e-19	ASPC	Sema5a
Pvt1	4.75169e-23	0.61691	0.273	0.143	9.67158e-19	ASPC	Pvt1
Serpinb6a	5.50995e-23	0.489077	0.258	0.133	1.12149e-18	ASPC	Serpinb6a
Lims1	6.2285e-23	0.606988	0.516	0.365	1.26775e-18	ASPC	Lims1
Ssh2	9.01334e-23	0.539275	0.712	0.574	1.83458e-18	ASPC	Ssh2
Prrc2b	1.11054e-22	0.488954	0.395	0.244	2.2604e-18	ASPC	Prrc2b
St3gal1	1.24018e-22	0.484018	0.305	0.165	2.52426e-18	ASPC	St3gal1
Agap1	1.31072e-22	0.629671	0.545	0.401	2.66784e-18	ASPC	Agap1
Abcc5	1.37895e-22	0.558442	0.455	0.309	2.80672e-18	ASPC	Abcc5
Zdhhc1	1.82865e-22	0.497583	0.271	0.142	3.72203e-18	ASPC	Zdhhc1
Eml4	2.34319e-22	0.604561	0.363	0.225	4.76932e-18	ASPC	Eml4
Sptlc2	2.52079e-22	0.476284	0.308	0.174	5.13082e-18	ASPC	Sptlc2
Cdk8	2.88307e-22	0.322237	0.885	0.783	5.86819e-18	ASPC	Cdk8
Rap1a	3.42572e-22	0.505551	0.471	0.322	6.9727e-18	ASPC	Rap1a
Ocrl	4.63526e-22	0.496984	0.256	0.134	9.4346e-18	ASPC	Ocrl
Cpq	6.33458e-22	0.554581	0.649	0.51	1.28934e-17	ASPC	Cpq
Col4a2	6.38587e-22	0.721774	0.519	0.376	1.29978e-17	ASPC	Col4a2
Cyfip1	9.65573e-22	0.54416	0.367	0.224	1.96533e-17	ASPC	Cyfip1
Bmpr2	1.25585e-21	0.564075	0.512	0.368	2.55615e-17	ASPC	Bmpr2
Rab30	1.37686e-21	0.567687	0.41	0.26	2.80247e-17	ASPC	Rab30
Nfkb1	1.60658e-21	0.525063	0.501	0.353	3.27003e-17	ASPC	Nfkb1
Rin2	1.97279e-21	0.636776	0.556	0.409	4.01541e-17	ASPC	Rin2
Cmip	2.05396e-21	0.326046	0.473	0.294	4.18064e-17	ASPC	Cmip
Rap1b	2.78317e-21	0.446003	0.305	0.174	5.66485e-17	ASPC	Rap1b
Heatr5a	3.05685e-21	0.472704	0.253	0.132	6.22192e-17	ASPC	Heatr5a
Mosmo	3.12368e-21	0.589543	0.348	0.215	6.35794e-17	ASPC	Mosmo
Tnrc18	4.15163e-21	0.442673	0.423	0.27	8.45023e-17	ASPC	Tnrc18
Copa	5.70505e-21	0.51951	0.471	0.333	1.16121e-16	ASPC	Copa
Cdc42bpa	6.51811e-21	0.48751	0.558	0.402	1.3267e-16	ASPC	Cdc42bpa
Creb3l2	8.65912e-21	0.545396	0.33	0.196	1.76248e-16	ASPC	Creb3l2
P2rx4	1.19007e-20	0.478313	0.296	0.168	2.42226e-16	ASPC	P2rx4
AY036118	1.30242e-20	0.512788	0.422	0.271	2.65095e-16	ASPC	AY036118
Magi3	2.22027e-20	0.487301	0.585	0.436	4.51915e-16	ASPC	Magi3
Esyt2	5.39501e-20	0.448507	0.662	0.516	1.0981e-15	ASPC	Esyt2
Zfp592	6.04023e-20	0.497914	0.405	0.264	1.22943e-15	ASPC	Zfp592
Kif2a	6.31175e-20	0.596927	0.325	0.197	1.28469e-15	ASPC	Kif2a
Magi1	7.31348e-20	0.284385	0.363	0.223	1.48859e-15	ASPC	Magi1
Foxo3	8.91907e-20	0.46849	0.399	0.254	1.81539e-15	ASPC	Foxo3
Arhgap17	1.19964e-19	0.428932	0.393	0.255	2.44175e-15	ASPC	Arhgap17
Nck1	2.24887e-19	0.539937	0.362	0.233	4.57735e-15	ASPC	Nck1
Lrrfip1	3.24982e-19	0.47337	0.256	0.141	6.61467e-15	ASPC	Lrrfip1
Sec23a	4.77109e-19	0.439434	0.285	0.166	9.71109e-15	ASPC	Sec23a
Fer	5.96304e-19	0.52247	0.536	0.403	1.21372e-14	ASPC	Fer
Clint1	1.91791e-18	0.498762	0.527	0.39	3.90371e-14	ASPC	Clint1
Zfp704	1.98599e-18	0.485428	0.315	0.189	4.04228e-14	ASPC	Zfp704
Ogt	2.39274e-18	0.348094	0.732	0.609	4.87018e-14	ASPC	Ogt
Srsf6	2.72236e-18	0.422747	0.334	0.207	5.54109e-14	ASPC	Srsf6
Map4k5	5.5461e-18	0.514587	0.385	0.26	1.12885e-13	ASPC	Map4k5
Fndc3a	7.58023e-18	0.500565	0.489	0.359	1.54288e-13	ASPC	Fndc3a
Kifap3	8.58016e-18	0.458385	0.266	0.153	1.74641e-13	ASPC	Kifap3
Rab2a	1.09535e-17	0.479878	0.504	0.378	2.22948e-13	ASPC	Rab2a
Ints6l	1.61814e-17	0.359005	0.262	0.146	3.29356e-13	ASPC	Ints6l
Appl1	1.77581e-17	0.428887	0.311	0.19	3.61449e-13	ASPC	Appl1
Tanc1	3.04504e-17	0.410152	0.329	0.207	6.19786e-13	ASPC	Tanc1
Ptk2	3.84408e-17	0.406438	0.529	0.39	7.82424e-13	ASPC	Ptk2
Ascc3	5.37006e-17	0.476683	0.488	0.357	1.09302e-12	ASPC	Ascc3
Ick	5.62357e-17	0.457048	0.318	0.199	1.14462e-12	ASPC	Ick
Cr1l	1.06341e-16	0.474467	0.316	0.2	2.16446e-12	ASPC	Cr1l
Eri3	1.66669e-16	0.460669	0.559	0.439	3.39237e-12	ASPC	Eri3
Atrnl1	2.78259e-16	0.372606	0.778	0.657	5.66369e-12	ASPC	Atrnl1
Fchsd2	3.07189e-16	0.419207	0.362	0.236	6.25253e-12	ASPC	Fchsd2
Iqgap1	3.23571e-16	0.319556	0.349	0.221	6.58596e-12	ASPC	Iqgap1
E130102H24Rik	4.43556e-16	0.395808	0.251	0.146	9.02815e-12	ASPC	E130102H24Rik
Uvrag	5.06432e-16	0.29305	0.545	0.403	1.03079e-11	ASPC	Uvrag
Tmcc3	5.2529e-16	0.515196	0.597	0.484	1.06918e-11	ASPC	Tmcc3
Commd10	6.51957e-16	0.545651	0.304	0.192	1.32699e-11	ASPC	Commd10
Dennd1a	7.12507e-16	0.320707	0.774	0.677	1.45024e-11	ASPC	Dennd1a
Ndfip1	9.10708e-16	0.418696	0.381	0.259	1.85365e-11	ASPC	Ndfip1
Npepps	1.13723e-15	0.504076	0.514	0.399	2.31471e-11	ASPC	Npepps
Trio	1.4443e-15	0.446993	0.607	0.489	2.93974e-11	ASPC	Trio
Rock2	1.55483e-15	0.455172	0.663	0.569	3.16471e-11	ASPC	Rock2
Zfand3	2.7503e-15	0.34669	0.819	0.735	5.59797e-11	ASPC	Zfand3
Add1	3.09116e-15	0.416139	0.356	0.238	6.29176e-11	ASPC	Add1
Ybx3	4.15565e-15	0.411459	0.27	0.163	8.45841e-11	ASPC	Ybx3
Laptm4a	5.09266e-15	0.427191	0.311	0.201	1.03656e-10	ASPC	Laptm4a
Ctdsp2	5.14367e-15	0.370851	0.311	0.196	1.04694e-10	ASPC	Ctdsp2
Snx6	5.41819e-15	0.42378	0.405	0.282	1.10282e-10	ASPC	Snx6
Ncoa3	5.69475e-15	0.341226	0.36	0.238	1.15911e-10	ASPC	Ncoa3
Dip2b	6.16776e-15	0.396444	0.404	0.284	1.25539e-10	ASPC	Dip2b
Iqsec2	6.17645e-15	0.420276	0.327	0.213	1.25716e-10	ASPC	Iqsec2
Papss2	7.20569e-15	0.554032	0.266	0.162	1.46665e-10	ASPC	Papss2
Dync2h1	8.72348e-15	0.448055	0.329	0.216	1.77558e-10	ASPC	Dync2h1
Gnaq	1.18143e-14	0.314835	0.778	0.667	2.40469e-10	ASPC	Gnaq
Cdk19	1.87103e-14	0.433729	0.322	0.209	3.8083e-10	ASPC	Cdk19
Wdr44	2.00235e-14	0.433185	0.253	0.153	4.07559e-10	ASPC	Wdr44
Sp3	2.41966e-14	0.442332	0.456	0.34	4.92498e-10	ASPC	Sp3
Parva	2.57332e-14	0.430111	0.485	0.354	5.23774e-10	ASPC	Parva
Rock1	3.31367e-14	0.362995	0.589	0.467	6.74465e-10	ASPC	Rock1
Fancc	4.49627e-14	0.55414	0.255	0.159	9.15172e-10	ASPC	Fancc
Mier1	6.02929e-14	0.406264	0.433	0.318	1.2272e-09	ASPC	Mier1
Slc38a2	6.06868e-14	0.376263	0.312	0.201	1.23522e-09	ASPC	Slc38a2
Ptpra	8.41815e-14	0.405587	0.444	0.329	1.71343e-09	ASPC	Ptpra
Ap3b1	1.12801e-13	0.384556	0.505	0.39	2.29595e-09	ASPC	Ap3b1
Phlpp1	1.5293e-13	0.47315	0.537	0.426	3.11274e-09	ASPC	Phlpp1
Pura	1.71365e-13	0.378296	0.314	0.209	3.48796e-09	ASPC	Pura
Btrc	1.76881e-13	0.465012	0.473	0.363	3.60023e-09	ASPC	Btrc
Scai	1.7958e-13	0.448977	0.356	0.247	3.65517e-09	ASPC	Scai
Limd1	1.98565e-13	0.381796	0.264	0.166	4.04159e-09	ASPC	Limd1
Adam12	2.09649e-13	0.918542	0.653	0.602	4.2672e-09	ASPC	Adam12
Lmbr1	2.83019e-13	0.425441	0.39	0.279	5.76058e-09	ASPC	Lmbr1
Micu1	2.92173e-13	0.417526	0.297	0.196	5.9469e-09	ASPC	Micu1
Zfp950	3.32149e-13	0.409704	0.382	0.272	6.76056e-09	ASPC	Zfp950
Smarca2	3.44078e-13	0.323679	0.549	0.421	7.00335e-09	ASPC	Smarca2
Bptf	4.57819e-13	0.402138	0.515	0.404	9.31844e-09	ASPC	Bptf
Ano6	4.61072e-13	0.354421	0.608	0.482	9.38465e-09	ASPC	Ano6
Pias1	5.06234e-13	0.305083	0.558	0.435	1.03039e-08	ASPC	Pias1
Stim2	7.2041e-13	0.409339	0.33	0.226	1.46632e-08	ASPC	Stim2
Slc23a2	7.56015e-13	0.392127	0.342	0.236	1.53879e-08	ASPC	Slc23a2
Gnai3	7.9293e-13	0.395476	0.29	0.19	1.61393e-08	ASPC	Gnai3
Crlf3	8.662e-13	0.314271	0.256	0.158	1.76306e-08	ASPC	Crlf3
Klc1	8.79013e-13	0.378925	0.381	0.269	1.78914e-08	ASPC	Klc1
Susd6	1.0349e-12	0.451338	0.453	0.348	2.10643e-08	ASPC	Susd6
Rbfox2	1.18604e-12	0.288629	0.801	0.67	2.41407e-08	ASPC	Rbfox2
Lats2	1.19204e-12	0.336023	0.267	0.169	2.42627e-08	ASPC	Lats2
Cep170	1.93905e-12	0.345648	0.486	0.374	3.94675e-08	ASPC	Cep170
Arpc2	2.444e-12	0.285228	0.297	0.194	4.97452e-08	ASPC	Arpc2
Fgd4	2.5373e-12	0.309758	0.371	0.256	5.16443e-08	ASPC	Fgd4
Akap11	2.7251e-12	0.356787	0.311	0.21	5.54667e-08	ASPC	Akap11
Diaph1	3.50234e-12	0.419502	0.312	0.214	7.12867e-08	ASPC	Diaph1
Aff1	3.52185e-12	0.376746	0.607	0.495	7.16837e-08	ASPC	Aff1
Umad1	4.30001e-12	0.391385	0.451	0.344	8.75224e-08	ASPC	Umad1
Usp24	5.18866e-12	0.355768	0.526	0.422	1.0561e-07	ASPC	Usp24
Nfix	5.45489e-12	0.336352	0.625	0.509	1.11029e-07	ASPC	Nfix
Tmod3	6.43597e-12	0.41313	0.345	0.243	1.30998e-07	ASPC	Tmod3
Peli1	6.57584e-12	0.398294	0.418	0.312	1.33845e-07	ASPC	Peli1
Fgfr1op2	7.96133e-12	0.400458	0.3	0.207	1.62045e-07	ASPC	Fgfr1op2
Hace1	1.39286e-11	0.376582	0.271	0.179	2.83502e-07	ASPC	Hace1
S100pbp	1.77578e-11	0.333519	0.279	0.186	3.61443e-07	ASPC	S100pbp
Mga	1.94042e-11	0.312314	0.475	0.366	3.94954e-07	ASPC	Mga
Wdpcp	2.2114e-11	0.432468	0.371	0.27	4.50109e-07	ASPC	Wdpcp
Tmem164	2.34651e-11	0.286755	0.493	0.373	4.77609e-07	ASPC	Tmem164
Fbxw8	2.39473e-11	0.371165	0.396	0.297	4.87422e-07	ASPC	Fbxw8
Kdm5b	3.77854e-11	0.352979	0.36	0.262	7.69084e-07	ASPC	Kdm5b
Mysm1	4.81029e-11	0.339155	0.296	0.203	9.79087e-07	ASPC	Mysm1
Ankrd44	5.46502e-11	0.330492	0.485	0.379	1.11235e-06	ASPC	Ankrd44
Arcn1	5.94853e-11	0.336786	0.295	0.203	1.21076e-06	ASPC	Arcn1
Nisch	6.09535e-11	0.33867	0.59	0.491	1.24065e-06	ASPC	Nisch
Rtn4	7.00198e-11	0.336639	0.475	0.368	1.42518e-06	ASPC	Rtn4
2023-09-07	9.2891e-11	0.390896	0.407	0.314	1.8907e-06	ASPC	2023-09-07
Peli2	1.26701e-10	0.329605	0.579	0.467	2.57888e-06	ASPC	Peli2
Elf1	1.52972e-10	0.408155	0.522	0.423	3.11359e-06	ASPC	Elf1
Washc4	1.55825e-10	0.310343	0.322	0.226	3.17166e-06	ASPC	Washc4
Exoc4	1.71224e-10	0.277402	0.756	0.673	3.48509e-06	ASPC	Exoc4
Klf3	1.88856e-10	0.429351	0.311	0.224	3.84398e-06	ASPC	Klf3
Rnf213	2.56351e-10	0.457295	0.282	0.196	5.21778e-06	ASPC	Rnf213
Zdhhc20	2.94968e-10	0.3547	0.366	0.27	6.00377e-06	ASPC	Zdhhc20
Csnk1g1	3.27621e-10	0.345224	0.422	0.325	6.6684e-06	ASPC	Csnk1g1
Pan3	4.76422e-10	0.300835	0.681	0.589	9.69709e-06	ASPC	Pan3
Ankrd10	8.1079e-10	0.344803	0.277	0.192	1.65028e-05	ASPC	Ankrd10
Itih5	9.54546e-10	0.385151	0.336	0.241	1.94288e-05	ASPC	Itih5
Prrg1	9.95447e-10	0.333748	0.256	0.172	2.02613e-05	ASPC	Prrg1
Phldb1	1.11106e-09	0.313038	0.401	0.303	2.26146e-05	ASPC	Phldb1
Atf7	1.13852e-09	0.291791	0.621	0.52	2.31734e-05	ASPC	Atf7
Tcf7l2	1.18149e-09	0.27329	0.775	0.664	2.4048e-05	ASPC	Tcf7l2
Cbfb	1.25874e-09	0.277844	0.333	0.238	2.56205e-05	ASPC	Cbfb
Cdc42	1.26946e-09	0.332282	0.445	0.353	2.58387e-05	ASPC	Cdc42
Dnaja1	1.271e-09	0.369871	0.311	0.223	2.587e-05	ASPC	Dnaja1
Stxbp5	1.31235e-09	0.353909	0.368	0.279	2.67116e-05	ASPC	Stxbp5
Glg1	1.32541e-09	0.346278	0.399	0.301	2.69773e-05	ASPC	Glg1
Fam13b	1.39971e-09	0.325279	0.379	0.289	2.84897e-05	ASPC	Fam13b
Pard3	1.50862e-09	0.263543	0.807	0.693	3.07065e-05	ASPC	Pard3
Pdcd4	1.76506e-09	0.394685	0.296	0.21	3.59259e-05	ASPC	Pdcd4
Rprd1a	1.78765e-09	0.407626	0.308	0.225	3.63858e-05	ASPC	Rprd1a
Stxbp3	1.79556e-09	0.278191	0.259	0.175	3.65469e-05	ASPC	Stxbp3
Nbeal1	1.86319e-09	0.323893	0.605	0.518	3.79233e-05	ASPC	Nbeal1
Tgfbr2	2.19156e-09	0.276453	0.463	0.351	4.4607e-05	ASPC	Tgfbr2
Tulp4	3.38297e-09	0.292873	0.463	0.369	6.8857e-05	ASPC	Tulp4
Slc12a6	3.39849e-09	0.283864	0.426	0.327	6.91729e-05	ASPC	Slc12a6
Phka1	3.52695e-09	0.387286	0.299	0.217	7.17876e-05	ASPC	Phka1
Ywhae	3.5792e-09	0.295571	0.442	0.352	7.28511e-05	ASPC	Ywhae
Thada	4.18252e-09	0.296079	0.474	0.377	8.5131e-05	ASPC	Thada
Otud7b	4.84208e-09	0.353089	0.384	0.295	9.85556e-05	ASPC	Otud7b
Chm	7.68859e-09	0.323102	0.263	0.185	0.000156493	ASPC	Chm
Lrp6	1.15849e-08	0.290034	0.599	0.516	0.000235799	ASPC	Lrp6
Nsd3	1.23562e-08	0.278976	0.636	0.55	0.000251498	ASPC	Nsd3
Mapk1	1.35396e-08	0.27647	0.493	0.402	0.000275584	ASPC	Mapk1
Dnmbp	1.45173e-08	0.326211	0.31	0.228	0.000295486	ASPC	Dnmbp
Igf1	1.59658e-08	0.511295	0.392	0.297	0.000324968	ASPC	Igf1
Diaph2	1.74244e-08	0.268443	0.756	0.691	0.000354657	ASPC	Diaph2
Abl1	1.93952e-08	0.281065	0.438	0.351	0.000394771	ASPC	Abl1
Slk	2.88571e-08	0.250549	0.34	0.252	0.000587358	ASPC	Slk
Sik3	3.2982e-08	0.255622	0.751	0.67	0.000671315	ASPC	Sik3
Foxp1	3.45185e-08	0.265309	0.827	0.783	0.00070259	ASPC	Foxp1
Clip1	3.76558e-08	0.330168	0.422	0.343	0.000766447	ASPC	Clip1
Srsf7	4.11834e-08	0.297057	0.281	0.205	0.000838246	ASPC	Srsf7
Tns2	4.16158e-08	0.28298	0.307	0.226	0.000847049	ASPC	Tns2
Hdac8	5.25902e-08	0.359913	0.486	0.406	0.00107042	ASPC	Hdac8
Yeats2	5.54403e-08	0.338609	0.259	0.185	0.00112843	ASPC	Yeats2
Xrn1	5.57498e-08	0.282303	0.481	0.396	0.00113473	ASPC	Xrn1
Rasa3	6.1311e-08	0.280324	0.452	0.353	0.00124792	ASPC	Rasa3
Itgb1	6.5467e-08	0.297295	0.344	0.265	0.00133251	ASPC	Itgb1
Arf4	6.78896e-08	0.363344	0.36	0.287	0.00138182	ASPC	Arf4
Cers5	7.78158e-08	0.379595	0.308	0.232	0.00158386	ASPC	Cers5
Dennd6a	9.32402e-08	0.325774	0.353	0.276	0.00189781	ASPC	Dennd6a
Hook3	9.83373e-08	0.318661	0.474	0.4	0.00200156	ASPC	Hook3
Uhrf2	1.086e-07	0.288678	0.388	0.309	0.00221044	ASPC	Uhrf2
Top2b	1.32765e-07	0.296878	0.378	0.3	0.0027023	ASPC	Top2b
Fam120b	1.93215e-07	0.262998	0.307	0.232	0.00393271	ASPC	Fam120b
Zfp608	2.32253e-07	0.328807	0.284	0.21	0.00472727	ASPC	Zfp608
Atp2c1	2.39595e-07	0.279078	0.318	0.24	0.00487671	ASPC	Atp2c1
Pola1	3.56251e-07	0.322334	0.262	0.189	0.00725114	ASPC	Pola1
Dis3l2	3.86501e-07	0.285569	0.455	0.376	0.00786684	ASPC	Dis3l2
Spop	4.79061e-07	0.323041	0.526	0.451	0.0097508	ASPC	Spop
Ski	5.20725e-07	0.259236	0.575	0.488	0.0105988	ASPC	Ski
Mta3	5.76578e-07	0.284366	0.358	0.28	0.0117357	ASPC	Mta3
Qser1	9.24172e-07	0.289037	0.277	0.206	0.0188106	ASPC	Qser1
St3gal4	1.20602e-06	0.31102	0.43	0.351	0.0245473	ASPC	St3gal4
Stat5b	1.25375e-06	0.304438	0.51	0.444	0.0255189	ASPC	Stat5b
Rc3h2	1.70018e-06	0.269742	0.396	0.322	0.0346055	ASPC	Rc3h2
Hmbox1	1.91642e-06	0.27265	0.389	0.319	0.0390067	ASPC	Hmbox1
2210408I21Rik	2.04259e-06	0.449229	0.379	0.311	0.0415749	ASPC	2210408I21Rik
Golim4	2.05023e-06	0.28342	0.292	0.223	0.0417305	ASPC	Golim4
Acsl1	0	3.58627	0.954	0.11	0	Adipocyte	Acsl1
Fam13a	0	3.41373	0.936	0.124	0	Adipocyte	Fam13a
Prkar2b	0	3.39163	0.959	0.109	0	Adipocyte	Prkar2b
Acaca	0	3.36678	0.916	0.128	0	Adipocyte	Acaca
Nrg4	0	3.30037	0.93	0.096	0	Adipocyte	Nrg4
Acacb	0	3.25332	0.957	0.109	0	Adipocyte	Acacb
Ppara	0	3.23972	0.851	0.104	0	Adipocyte	Ppara
Car3	0	3.23149	0.829	0.103	0	Adipocyte	Car3
Ppargc1b	0	3.09806	0.851	0.124	0	Adipocyte	Ppargc1b
Rgs7	0	3.04766	0.842	0.098	0	Adipocyte	Rgs7
Sik2	0	2.95121	0.95	0.304	0	Adipocyte	Sik2
Cidec	0	2.91446	0.78	0.079	0	Adipocyte	Cidec
Pck1	0	2.87933	0.808	0.088	0	Adipocyte	Pck1
Pde3b	0	2.8679	0.946	0.222	0	Adipocyte	Pde3b
Chpt1	0	2.8559	0.878	0.115	0	Adipocyte	Chpt1
Tspan18	0	2.82186	0.858	0.151	0	Adipocyte	Tspan18
Adipor2	0	2.80833	0.946	0.201	0	Adipocyte	Adipor2
Pcx	0	2.77212	0.823	0.099	0	Adipocyte	Pcx
Lipe	0	2.74596	0.893	0.104	0	Adipocyte	Lipe
Ralgapa2	0	2.72307	0.951	0.293	0	Adipocyte	Ralgapa2
Ghr	0	2.70238	0.937	0.429	0	Adipocyte	Ghr
Dgat2	0	2.70035	0.817	0.086	0	Adipocyte	Dgat2
Plin1	0	2.69356	0.818	0.078	0	Adipocyte	Plin1
A530053G22Rik	0	2.68498	0.695	0.079	0	Adipocyte	A530053G22Rik
Gm16168	0	2.6349	0.659	0.066	0	Adipocyte	Gm16168
Tmem45b	0	2.63288	0.566	0.058	0	Adipocyte	Tmem45b
Tenm4	0	2.60832	0.829	0.17	0	Adipocyte	Tenm4
Ctcflos	0	2.60186	0.745	0.074	0	Adipocyte	Ctcflos
Ntrk3	0	2.5986	0.8	0.239	0	Adipocyte	Ntrk3
Acvr1c	0	2.59529	0.722	0.07	0	Adipocyte	Acvr1c
Slc1a3	0	2.58074	0.856	0.236	0	Adipocyte	Slc1a3
Ankef1	0	2.55028	0.768	0.084	0	Adipocyte	Ankef1
Pmepa1	0	2.54967	0.741	0.098	0	Adipocyte	Pmepa1
Fgf14	0	2.548	0.684	0.106	0	Adipocyte	Fgf14
Acox1	0	2.54374	0.794	0.135	0	Adipocyte	Acox1
Hacd2	0	2.54185	0.765	0.122	0	Adipocyte	Hacd2
Slc1a5	0	2.53637	0.913	0.28	0	Adipocyte	Slc1a5
Mlxipl	0	2.52143	0.803	0.084	0	Adipocyte	Mlxipl
4933406I18Rik	0	2.46564	0.883	0.215	0	Adipocyte	4933406I18Rik
Cidea	0	2.40717	0.6	0.063	0	Adipocyte	Cidea
Ces1d	0	2.40691	0.759	0.073	0	Adipocyte	Ces1d
Ppp2r5a	0	2.3821	0.904	0.269	0	Adipocyte	Ppp2r5a
Por	0	2.36529	0.864	0.219	0	Adipocyte	Por
Slc27a1	0	2.36251	0.709	0.106	0	Adipocyte	Slc27a1
Fam214a	0	2.33351	0.879	0.289	0	Adipocyte	Fam214a
Tmem120b	0	2.33057	0.721	0.136	0	Adipocyte	Tmem120b
Adra1a	0	2.30745	0.597	0.07	0	Adipocyte	Adra1a
Aco2	0	2.30723	0.742	0.151	0	Adipocyte	Aco2
Slc36a2	0	2.30584	0.734	0.091	0	Adipocyte	Slc36a2
Atp1a2	0	2.30323	0.822	0.179	0	Adipocyte	Atp1a2
Plin4	0	2.30289	0.61	0.061	0	Adipocyte	Plin4
Gpd1	0	2.29161	0.686	0.074	0	Adipocyte	Gpd1
Smoc1	0	2.25286	0.589	0.089	0	Adipocyte	Smoc1
Pparg	0	2.25035	0.937	0.339	0	Adipocyte	Pparg
Akap1	0	2.24959	0.673	0.083	0	Adipocyte	Akap1
Prdm16	0	2.24616	0.771	0.177	0	Adipocyte	Prdm16
Kcnk3	0	2.20008	0.617	0.071	0	Adipocyte	Kcnk3
Txlng	0	2.1997	0.871	0.293	0	Adipocyte	Txlng
Vegfa	0	2.18332	0.771	0.111	0	Adipocyte	Vegfa
Esrrg	0	2.17397	0.68	0.19	0	Adipocyte	Esrrg
Lpin1	0	2.14419	0.736	0.131	0	Adipocyte	Lpin1
Pnpla3	0	2.14088	0.566	0.058	0	Adipocyte	Pnpla3
Gbe1	0	2.10734	0.817	0.286	0	Adipocyte	Gbe1
Sorbs1	0	2.09364	0.942	0.356	0	Adipocyte	Sorbs1
Hk2	0	2.09289	0.622	0.07	0	Adipocyte	Hk2
Sgcd	0	2.05089	0.843	0.287	0	Adipocyte	Sgcd
Neat1	0	2.04366	0.984	0.708	0	Adipocyte	Neat1
Art3	0	1.99696	0.632	0.105	0	Adipocyte	Art3
Aacs	0	1.98582	0.566	0.064	0	Adipocyte	Aacs
Fam126b	0	1.9656	0.67	0.159	0	Adipocyte	Fam126b
Prkag2	0	1.96249	0.842	0.444	0	Adipocyte	Prkag2
Cnnm2	0	1.93363	0.676	0.169	0	Adipocyte	Cnnm2
Lpl	0	1.89778	0.831	0.317	0	Adipocyte	Lpl
Acadm	0	1.88942	0.633	0.127	0	Adipocyte	Acadm
Pfkfb3	0	1.88936	0.751	0.232	0	Adipocyte	Pfkfb3
Tspan12	0	1.88552	0.662	0.128	0	Adipocyte	Tspan12
Pfkfb1	0	1.86969	0.586	0.068	0	Adipocyte	Pfkfb1
Thrb	0	1.86594	0.897	0.392	0	Adipocyte	Thrb
Bckdhb	0	1.85287	0.802	0.307	0	Adipocyte	Bckdhb
Sh2b2	0	1.85161	0.59	0.088	0	Adipocyte	Sh2b2
Negr1	0	1.84399	0.888	0.377	0	Adipocyte	Negr1
Miga2	0	1.84117	0.606	0.068	0	Adipocyte	Miga2
Tns1	0	1.83692	0.986	0.653	0	Adipocyte	Tns1
Pakap	0	1.83516	0.637	0.127	0	Adipocyte	Pakap
Gm26917	0	1.77854	0.986	0.673	0	Adipocyte	Gm26917
Gys1	0	1.76397	0.581	0.079	0	Adipocyte	Gys1
Slc22a23	0	1.74455	0.621	0.13	0	Adipocyte	Slc22a23
Ptpn4	0	1.68421	0.757	0.312	0	Adipocyte	Ptpn4
Fabp4	0	1.612	0.842	0.233	0	Adipocyte	Fabp4
Fry	0	1.56867	0.867	0.41	0	Adipocyte	Fry
Sox6	0	1.53418	0.778	0.169	0	Adipocyte	Sox6
Mical3	0	1.48952	0.803	0.348	0	Adipocyte	Mical3
Immp2l	0	1.44935	0.962	0.571	0	Adipocyte	Immp2l
Mgll	0	1.40106	0.815	0.243	0	Adipocyte	Mgll
Prkce	0	1.38019	0.924	0.647	0	Adipocyte	Prkce
Ptprd	0	1.34668	0.889	0.412	0	Adipocyte	Ptprd
Pde4d	0	1.29815	0.896	0.488	0	Adipocyte	Pde4d
Efna5	0	1.23573	0.849	0.327	0	Adipocyte	Efna5
Sox5	0	1.1537	0.941	0.476	0	Adipocyte	Sox5
Nfia	0	1.04013	0.991	0.82	0	Adipocyte	Nfia
Cd36	0	1.0359	0.882	0.379	0	Adipocyte	Cd36
Chchd3	2.70816e-303	1.36809	0.823	0.504	5.51219e-299	Adipocyte	Chchd3
Atl2	3.90128e-303	1.81002	0.635	0.171	7.94066e-299	Adipocyte	Atl2
Dpyd	1.60293e-302	1.17606	0.848	0.375	3.2626e-298	Adipocyte	Dpyd
Malat1	4.67524e-302	0.698571	1	1	9.51599e-298	Adipocyte	Malat1
Vwa8	4.12644e-300	1.52708	0.787	0.422	8.39896e-296	Adipocyte	Vwa8
Cyp2e1	2.17227e-298	2.46964	0.531	0.056	4.42144e-294	Adipocyte	Cyp2e1
Cdo1	2.87603e-298	1.91987	0.544	0.068	5.85387e-294	Adipocyte	Cdo1
Ptprm	1.68295e-294	0.781892	0.946	0.549	3.42548e-290	Adipocyte	Ptprm
Agmo	6.66535e-292	1.18424	0.872	0.504	1.35666e-287	Adipocyte	Agmo
Dgat1	1.61191e-291	1.74299	0.534	0.061	3.28089e-287	Adipocyte	Dgat1
Sntb1	1.31936e-284	2.0526	0.593	0.13	2.68543e-280	Adipocyte	Sntb1
Cgnl1	4.6392e-278	1.50954	0.669	0.206	9.44262e-274	Adipocyte	Cgnl1
Cpeb3	4.72173e-278	1.52322	0.689	0.276	9.61061e-274	Adipocyte	Cpeb3
Hsd17b12	6.83185e-278	1.87866	0.603	0.177	1.39055e-273	Adipocyte	Hsd17b12
Luc7l2	6.12586e-274	0.878259	0.937	0.823	1.24686e-269	Adipocyte	Luc7l2
Tkt	9.14764e-271	1.9045	0.545	0.099	1.86191e-266	Adipocyte	Tkt
Gnpat	1.12763e-269	1.60645	0.553	0.101	2.29518e-265	Adipocyte	Gnpat
Thrsp	2.10626e-269	1.75921	0.504	0.056	4.28707e-265	Adipocyte	Thrsp
Trarg1	1.42873e-267	1.63832	0.533	0.084	2.90804e-263	Adipocyte	Trarg1
Pank1	2.28401e-267	2.33202	0.524	0.084	4.64887e-263	Adipocyte	Pank1
Cluh	8.78709e-266	1.56881	0.519	0.074	1.78852e-261	Adipocyte	Cluh
Prkn	6.08449e-264	1.08724	0.869	0.564	1.23844e-259	Adipocyte	Prkn
Ephx2	6.84136e-264	1.68274	0.499	0.059	1.39249e-259	Adipocyte	Ephx2
Adrb3	6.26198e-263	1.85772	0.498	0.056	1.27456e-258	Adipocyte	Adrb3
Acss3	6.38353e-262	1.31404	0.767	0.341	1.2993e-257	Adipocyte	Acss3
Larp1b	3.86098e-260	1.57154	0.587	0.145	7.85865e-256	Adipocyte	Larp1b
Slc24a3	6.98028e-258	0.901764	0.861	0.396	1.42077e-253	Adipocyte	Slc24a3
Ywhag	4.2794e-255	1.46024	0.635	0.228	8.71028e-251	Adipocyte	Ywhag
Ppargc1a	1.07655e-250	2.22661	0.478	0.05	2.1912e-246	Adipocyte	Ppargc1a
Slc25a51	1.18892e-249	1.61885	0.56	0.142	2.41992e-245	Adipocyte	Slc25a51
Optn	8.66537e-249	1.50251	0.531	0.104	1.76375e-244	Adipocyte	Optn
Pik3r1	1.02742e-248	1.48479	0.846	0.595	2.0912e-244	Adipocyte	Pik3r1
Ak2	3.75079e-246	1.54861	0.539	0.109	7.63436e-242	Adipocyte	Ak2
Gpam	1.90144e-245	1.58682	0.54	0.112	3.87019e-241	Adipocyte	Gpam
Erbb4	1.24886e-243	2.45565	0.471	0.051	2.54193e-239	Adipocyte	Erbb4
Hibch	4.9017e-242	1.4729	0.566	0.15	9.97691e-238	Adipocyte	Hibch
Gtf2ird1	4.1539e-241	1.74463	0.535	0.127	8.45484e-237	Adipocyte	Gtf2ird1
Inca1	8.8934e-241	1.55901	0.457	0.044	1.81016e-236	Adipocyte	Inca1
Tob1	9.15702e-238	1.58163	0.468	0.056	1.86382e-233	Adipocyte	Tob1
Clybl	2.83575e-237	1.37903	0.664	0.261	5.77188e-233	Adipocyte	Clybl
Cav1	2.96324e-236	1.30382	0.667	0.224	6.03137e-232	Adipocyte	Cav1
Osbpl11	8.26753e-236	1.40221	0.671	0.296	1.68277e-231	Adipocyte	Osbpl11
Agpat2	8.21439e-235	1.56086	0.464	0.055	1.67196e-230	Adipocyte	Agpat2
Scd1	8.45829e-234	1.95668	0.488	0.077	1.7216e-229	Adipocyte	Scd1
Ctdspl	2.69519e-232	1.51461	0.676	0.302	5.4858e-228	Adipocyte	Ctdspl
Dcun1d3	2.63946e-229	1.44915	0.662	0.267	5.37235e-225	Adipocyte	Dcun1d3
Gpat4	4.14187e-229	1.5012	0.527	0.118	8.43037e-225	Adipocyte	Gpat4
Aifm2	2.09506e-228	1.46875	0.45	0.05	4.26428e-224	Adipocyte	Aifm2
Ppip5k1	1.2102e-226	1.41876	0.538	0.132	2.46325e-222	Adipocyte	Ppip5k1
Rgcc	3.57365e-226	1.34674	0.546	0.122	7.2738e-222	Adipocyte	Rgcc
Tmem120a	1.48017e-223	1.6302	0.444	0.051	3.01274e-219	Adipocyte	Tmem120a
Ifrd1	3.14184e-223	1.44181	0.564	0.171	6.3949e-219	Adipocyte	Ifrd1
Apol6	1.12401e-222	1.57153	0.434	0.042	2.28781e-218	Adipocyte	Apol6
Mmd	2.20105e-222	1.68864	0.488	0.096	4.48002e-218	Adipocyte	Mmd
Akt2	2.07427e-220	1.33722	0.551	0.15	4.22197e-216	Adipocyte	Akt2
Golgb1	2.23473e-215	1.31311	0.721	0.39	4.54857e-211	Adipocyte	Golgb1
Il15ra	3.67922e-215	1.2901	0.6	0.206	7.48868e-211	Adipocyte	Il15ra
Bnip3	3.69258e-215	1.52913	0.46	0.072	7.51587e-211	Adipocyte	Bnip3
Lncbate1	9.98857e-214	1.5574	0.424	0.045	2.03307e-209	Adipocyte	Lncbate1
Sh3pxd2a	2.17812e-213	1.31187	0.755	0.43	4.43335e-209	Adipocyte	Sh3pxd2a
Pex14	8.35402e-213	1.24151	0.673	0.3	1.70038e-208	Adipocyte	Pex14
Slc16a10	5.44585e-212	1.49704	0.555	0.161	1.10845e-207	Adipocyte	Slc16a10
Acss2	2.52841e-211	1.79309	0.469	0.082	5.14632e-207	Adipocyte	Acss2
Noct	4.31444e-211	1.67931	0.503	0.118	8.78161e-207	Adipocyte	Noct
Gpat3	6.57877e-209	1.6813	0.425	0.048	1.33904e-204	Adipocyte	Gpat3
Grina	7.71611e-209	1.3488	0.539	0.145	1.57054e-204	Adipocyte	Grina
Gstz1	2.09901e-207	1.39086	0.439	0.064	4.27232e-203	Adipocyte	Gstz1
Pdk4	4.24977e-207	1.97568	0.423	0.05	8.64999e-203	Adipocyte	Pdk4
Fasn	6.63703e-207	1.7057	0.427	0.051	1.3509e-202	Adipocyte	Fasn
Cat	9.8803e-207	1.39404	0.51	0.129	2.01104e-202	Adipocyte	Cat
Slc4a4	1.57247e-204	1.91708	0.733	0.392	3.20061e-200	Adipocyte	Slc4a4
Adhfe1	4.54386e-204	1.35921	0.496	0.114	9.24858e-200	Adipocyte	Adhfe1
Mpc1	1.73846e-202	1.36544	0.55	0.184	3.53847e-198	Adipocyte	Mpc1
Entpd5	4.40907e-201	1.46128	0.432	0.064	8.97423e-197	Adipocyte	Entpd5
Elovl6	6.33445e-200	2.03021	0.476	0.107	1.28931e-195	Adipocyte	Elovl6
Myl1	1.15417e-199	1.39001	0.414	0.049	2.34919e-195	Adipocyte	Myl1
Acadl	1.67139e-199	1.3169	0.566	0.194	3.40195e-195	Adipocyte	Acadl
Vgll4	2.61252e-198	1.28132	0.727	0.414	5.31753e-194	Adipocyte	Vgll4
Ddo	6.97845e-198	1.45704	0.464	0.095	1.42039e-193	Adipocyte	Ddo
Slc25a19	7.7104e-197	1.42013	0.407	0.049	1.56937e-192	Adipocyte	Slc25a19
Tob2	1.74476e-195	1.39181	0.515	0.146	3.55128e-191	Adipocyte	Tob2
D5Ertd579e	1.9922e-195	1.2603	0.657	0.334	4.05492e-191	Adipocyte	D5Ertd579e
Rbm47	6.19125e-195	1.06763	0.698	0.307	1.26017e-190	Adipocyte	Rbm47
Cnst	1.41565e-194	1.39443	0.531	0.163	2.88142e-190	Adipocyte	Cnst
Adipoq	1.70329e-194	1.36278	0.394	0.04	3.46687e-190	Adipocyte	Adipoq
Gm35552	2.67806e-193	1.39147	0.39	0.038	5.45092e-189	Adipocyte	Gm35552
Plaat3	4.57405e-193	1.59761	0.431	0.074	9.31002e-189	Adipocyte	Plaat3
Med12l	7.17157e-192	1.44493	0.462	0.098	1.4597e-187	Adipocyte	Med12l
Cpt1b	7.46188e-192	1.71224	0.393	0.041	1.51879e-187	Adipocyte	Cpt1b
Zfp423	2.06878e-191	1.25282	0.612	0.235	4.2108e-187	Adipocyte	Zfp423
Acad11	1.38302e-190	1.36584	0.411	0.057	2.81501e-186	Adipocyte	Acad11
Lama4	7.91889e-190	1.13629	0.759	0.444	1.61181e-185	Adipocyte	Lama4
Slc25a20	4.16336e-189	1.48075	0.452	0.096	8.4741e-185	Adipocyte	Slc25a20
Mrap	1.48575e-186	1.2653	0.38	0.037	3.0241e-182	Adipocyte	Mrap
Acyp2	1.40636e-185	1.1112	0.71	0.352	2.86251e-181	Adipocyte	Acyp2
Xrcc6	3.49015e-185	1.53889	0.398	0.052	7.10385e-181	Adipocyte	Xrcc6
Lonp2	2.48859e-184	1.08903	0.695	0.416	5.06528e-180	Adipocyte	Lonp2
Tmeff1	4.61821e-184	1.36208	0.396	0.049	9.39991e-180	Adipocyte	Tmeff1
Me1	3.93115e-183	1.76758	0.466	0.114	8.00146e-179	Adipocyte	Me1
Gk	4.02079e-179	2.24492	0.375	0.04	8.18392e-175	Adipocyte	Gk
Dlat	1.37356e-178	1.26508	0.49	0.14	2.79574e-174	Adipocyte	Dlat
Slc22a3	5.04494e-178	1.28096	0.404	0.063	1.02685e-173	Adipocyte	Slc22a3
Angpt1	2.08899e-177	1.38589	0.537	0.174	4.25193e-173	Adipocyte	Angpt1
Cfd	1.83354e-176	1.36575	0.368	0.036	3.73198e-172	Adipocyte	Cfd
Ivns1abp	9.98855e-176	1.29924	0.578	0.223	2.03307e-171	Adipocyte	Ivns1abp
Gm3289	1.29995e-174	1.24607	0.379	0.046	2.64593e-170	Adipocyte	Gm3289
Alas1	1.81596e-174	1.34624	0.45	0.107	3.6962e-170	Adipocyte	Alas1
Crat	4.21792e-174	1.21359	0.379	0.047	8.58515e-170	Adipocyte	Crat
Gucd1	5.06813e-174	1.52439	0.431	0.091	1.03157e-169	Adipocyte	Gucd1
Tef	3.49679e-173	1.08803	0.652	0.296	7.11737e-169	Adipocyte	Tef
Pkd2l2	1.33417e-170	1.22179	0.354	0.033	2.71558e-166	Adipocyte	Pkd2l2
Etfa	3.02041e-170	1.11352	0.628	0.305	6.14773e-166	Adipocyte	Etfa
Rnf152	4.9459e-170	1.74	0.412	0.079	1.00669e-165	Adipocyte	Rnf152
Abcd3	6.7525e-170	1.23596	0.593	0.271	1.3744e-165	Adipocyte	Abcd3
Hadhb	1.04492e-169	1.33865	0.529	0.196	2.12684e-165	Adipocyte	Hadhb
A830018L16Rik	2.29415e-169	1.58629	0.362	0.039	4.66952e-165	Adipocyte	A830018L16Rik
Chp1	3.59083e-169	1.22008	0.535	0.201	7.30878e-165	Adipocyte	Chp1
Lgals12	9.51926e-168	1.25118	0.37	0.047	1.93755e-163	Adipocyte	Lgals12
Pnpla2	2.12153e-165	1.17533	0.37	0.048	4.31817e-161	Adipocyte	Pnpla2
Aox1	2.43998e-165	1.15303	0.566	0.22	4.96634e-161	Adipocyte	Aox1
Gphn	1.12827e-164	0.607552	0.985	0.918	2.29647e-160	Adipocyte	Gphn
Msrb3	3.88761e-163	1.11187	0.618	0.284	7.91285e-159	Adipocyte	Msrb3
Sucla2	1.57151e-161	1.35007	0.504	0.181	3.19864e-157	Adipocyte	Sucla2
Gpd2	4.42771e-161	1.46843	0.516	0.204	9.01216e-157	Adipocyte	Gpd2
Irs1	1.56171e-160	1.23344	0.58	0.249	3.17871e-156	Adipocyte	Irs1
Slc25a42	5.7e-160	1.50284	0.383	0.064	1.16018e-155	Adipocyte	Slc25a42
Ltbp3	7.5868e-160	1.13116	0.478	0.141	1.54422e-155	Adipocyte	Ltbp3
Nampt	1.17032e-159	1.15694	0.618	0.303	2.38208e-155	Adipocyte	Nampt
Grk3	3.10973e-159	1.19948	0.565	0.226	6.32955e-155	Adipocyte	Grk3
Ppp1r3b	1.17852e-158	1.41002	0.339	0.033	2.39876e-154	Adipocyte	Ppp1r3b
Abcd2	2.91246e-157	1.42705	0.437	0.118	5.92803e-153	Adipocyte	Abcd2
Aplp2	3.59085e-157	0.989633	0.678	0.384	7.30881e-153	Adipocyte	Aplp2
Hadha	4.32388e-157	1.26693	0.508	0.193	8.80082e-153	Adipocyte	Hadha
Aco1	2.21663e-156	1.15095	0.503	0.182	4.51174e-152	Adipocyte	Aco1
Stau2	6.33066e-156	1.12463	0.542	0.211	1.28854e-151	Adipocyte	Stau2
Nedd4	3.21532e-155	0.742752	0.867	0.633	6.54447e-151	Adipocyte	Nedd4
Aldh6a1	4.94946e-155	1.15897	0.408	0.091	1.00741e-150	Adipocyte	Aldh6a1
Aspg	5.01726e-154	1.59296	0.341	0.039	1.02121e-149	Adipocyte	Aspg
Ppp1r9a	4.98154e-152	1.02353	0.617	0.284	1.01394e-147	Adipocyte	Ppp1r9a
4931406C07Rik	9.46314e-151	1.14047	0.448	0.13	1.92613e-146	Adipocyte	4931406C07Rik
Idh3a	2.80313e-150	1.12356	0.348	0.048	5.7055e-146	Adipocyte	Idh3a
Dusp10	1.432e-148	1.45554	0.373	0.073	2.9147e-144	Adipocyte	Dusp10
Pex13	3.60825e-146	1.10652	0.486	0.177	7.34423e-142	Adipocyte	Pex13
Srebf1	3.71756e-146	1.07766	0.357	0.059	7.56672e-142	Adipocyte	Srebf1
Itpr2	5.52461e-146	1.22823	0.745	0.532	1.12448e-141	Adipocyte	Itpr2
Gm35853	7.11866e-146	1.39723	0.347	0.053	1.44893e-141	Adipocyte	Gm35853
B3galt2	4.42489e-145	1.19494	0.305	0.024	9.00642e-141	Adipocyte	B3galt2
Palmd	6.90089e-144	0.984245	0.495	0.161	1.40461e-139	Adipocyte	Palmd
Insr	6.91114e-144	0.842053	0.743	0.503	1.40669e-139	Adipocyte	Insr
Rasl12	2.27882e-143	1.07371	0.419	0.102	4.63832e-139	Adipocyte	Rasl12
Pank3	3.09421e-143	1.28441	0.406	0.111	6.29796e-139	Adipocyte	Pank3
Hipk2	1.23385e-142	1.02388	0.646	0.362	2.51137e-138	Adipocyte	Hipk2
Coq8a	1.26348e-142	1.49796	0.331	0.046	2.57168e-138	Adipocyte	Coq8a
Prxl2a	4.4946e-142	1.04434	0.315	0.035	9.1483e-138	Adipocyte	Prxl2a
Kif1b	4.67398e-142	0.84675	0.755	0.519	9.51341e-138	Adipocyte	Kif1b
Sipa1l1	9.06889e-142	0.994771	0.681	0.409	1.84588e-137	Adipocyte	Sipa1l1
Sugct	1.10368e-140	1.16135	0.519	0.204	2.24642e-136	Adipocyte	Sugct
Nedd4l	1.66076e-140	1.05461	0.754	0.525	3.38032e-136	Adipocyte	Nedd4l
Cdip1	3.33913e-140	1.07482	0.548	0.253	6.79647e-136	Adipocyte	Cdip1
Nabp1	3.95009e-140	1.13134	0.43	0.121	8.04002e-136	Adipocyte	Nabp1
Pgm1	6.95907e-140	1.10956	0.455	0.151	1.41645e-135	Adipocyte	Pgm1
Nrip1	8.78959e-140	1.30116	0.705	0.501	1.78903e-135	Adipocyte	Nrip1
Blcap	1.02324e-139	1.1154	0.413	0.116	2.0827e-135	Adipocyte	Blcap
Macrod1	3.1557e-139	1.31446	0.382	0.088	6.42311e-135	Adipocyte	Macrod1
Sort1	4.11267e-139	1.06044	0.413	0.112	8.37093e-135	Adipocyte	Sort1
Tmem135	5.39557e-139	0.908591	0.734	0.536	1.09821e-134	Adipocyte	Tmem135
Bcl6	6.79544e-139	1.15795	0.516	0.211	1.38314e-134	Adipocyte	Bcl6
Aoc3	8.82494e-139	1.02599	0.338	0.051	1.79623e-134	Adipocyte	Aoc3
Ccnl2	2.09657e-138	0.927722	0.663	0.392	4.26737e-134	Adipocyte	Ccnl2
Clmn	3.45263e-138	1.31356	0.37	0.08	7.02747e-134	Adipocyte	Clmn
Ddhd2	1.44701e-136	1.18306	0.494	0.201	2.94524e-132	Adipocyte	Ddhd2
Rnf24	2.34806e-136	1.1565	0.39	0.098	4.77925e-132	Adipocyte	Rnf24
Glul	2.8663e-135	1.14934	0.459	0.155	5.83407e-131	Adipocyte	Glul
Car5b	1.21694e-134	1.23124	0.324	0.048	2.47697e-130	Adipocyte	Car5b
Dpf3	6.16187e-134	1.02408	0.427	0.117	1.25419e-129	Adipocyte	Dpf3
A530016L24Rik	1.65137e-133	1.11215	0.289	0.024	3.3612e-129	Adipocyte	A530016L24Rik
Adtrp	2.54556e-132	1.34048	0.302	0.036	5.18124e-128	Adipocyte	Adtrp
Ehhadh	1.86615e-131	1.33645	0.312	0.043	3.79836e-127	Adipocyte	Ehhadh
Tshr	1.08454e-130	1.81418	0.298	0.033	2.20748e-126	Adipocyte	Tshr
Ppa1	2.03493e-130	1.24457	0.324	0.054	4.14189e-126	Adipocyte	Ppa1
Arl4a	1.94414e-129	1.00372	0.359	0.078	3.95711e-125	Adipocyte	Arl4a
Abhd5	1.04623e-127	1.12827	0.395	0.113	2.1295e-123	Adipocyte	Abhd5
Plin2	3.43997e-127	1.02303	0.528	0.231	7.00171e-123	Adipocyte	Plin2
Acly	7.57562e-126	1.50935	0.412	0.14	1.54194e-121	Adipocyte	Acly
Acsm3	1.00372e-125	1.23365	0.283	0.029	2.04298e-121	Adipocyte	Acsm3
Ppp2r1b	3.10515e-125	1.00837	0.334	0.067	6.32022e-121	Adipocyte	Ppp2r1b
Bcl2l13	5.0153e-125	1.00174	0.446	0.164	1.02081e-120	Adipocyte	Bcl2l13
Eci1	3.01638e-124	1.02087	0.327	0.061	6.13954e-120	Adipocyte	Eci1
Itpr1	3.30833e-124	0.706055	0.769	0.488	6.73378e-120	Adipocyte	Itpr1
Hibadh	8.45099e-124	0.890601	0.665	0.405	1.72011e-119	Adipocyte	Hibadh
Sh3glb2	1.83737e-123	1.04405	0.28	0.029	3.73979e-119	Adipocyte	Sh3glb2
Acat1	2.43092e-123	1.05391	0.456	0.171	4.94789e-119	Adipocyte	Acat1
Ptpn14	2.58112e-123	0.873887	0.522	0.211	5.2536e-119	Adipocyte	Ptpn14
Ncor1	8.438e-123	0.714541	0.816	0.689	1.71747e-118	Adipocyte	Ncor1
Esrra	1.01979e-122	1.08939	0.407	0.129	2.07568e-118	Adipocyte	Esrra
Mtus1	3.29466e-122	0.875858	0.602	0.305	6.70594e-118	Adipocyte	Mtus1
Dnajc15	1.07975e-121	0.972633	0.416	0.136	2.19772e-117	Adipocyte	Dnajc15
Sfxn5	2.79526e-121	1.03717	0.443	0.155	5.68947e-117	Adipocyte	Sfxn5
Fbxo21	5.17002e-121	1.13111	0.351	0.083	1.05231e-116	Adipocyte	Fbxo21
Mpc2	8.23968e-121	1.07427	0.37	0.101	1.6771e-116	Adipocyte	Mpc2
Mknk2	1.01006e-120	0.940488	0.318	0.057	2.05588e-116	Adipocyte	Mknk2
Tmem132b	6.824e-120	1.42251	0.278	0.03	1.38896e-115	Adipocyte	Tmem132b
Mfn2	9.30222e-120	0.987052	0.355	0.087	1.89337e-115	Adipocyte	Mfn2
Dram1	2.2799e-119	1.20586	0.407	0.14	4.6405e-115	Adipocyte	Dram1
G0s2	5.3634e-119	1.03411	0.314	0.057	1.09167e-114	Adipocyte	G0s2
Echdc1	9.74359e-119	1.12073	0.352	0.089	1.98321e-114	Adipocyte	Echdc1
Chdh	4.22887e-118	0.988218	0.274	0.03	8.60744e-114	Adipocyte	Chdh
Dhdh	1.03174e-117	0.993185	0.434	0.156	2.09999e-113	Adipocyte	Dhdh
Nudt7	1.61231e-117	0.905307	0.305	0.051	3.28169e-113	Adipocyte	Nudt7
4931428L18Rik	2.21209e-117	1.11859	0.277	0.033	4.50249e-113	Adipocyte	4931428L18Rik
Nav2	2.96608e-117	1.57106	0.441	0.175	6.03716e-113	Adipocyte	Nav2
Ap3s1	8.84467e-117	0.920375	0.554	0.294	1.80024e-112	Adipocyte	Ap3s1
Deptor	1.45217e-116	0.931551	0.616	0.337	2.95576e-112	Adipocyte	Deptor
Csad	2.116e-116	0.94674	0.473	0.197	4.3069e-112	Adipocyte	Csad
4931406P16Rik	3.22962e-116	0.990782	0.627	0.35	6.57356e-112	Adipocyte	4931406P16Rik
Adk	4.94384e-116	0.797869	0.72	0.46	1.00627e-111	Adipocyte	Adk
Chd7	6.31635e-116	0.93043	0.531	0.247	1.28563e-111	Adipocyte	Chd7
Mettl24	5.6605e-115	1.10938	0.288	0.042	1.15214e-110	Adipocyte	Mettl24
Gse1	9.0041e-115	0.995834	0.744	0.473	1.83269e-110	Adipocyte	Gse1
Pus10	1.46358e-114	0.922354	0.477	0.198	2.97898e-110	Adipocyte	Pus10
Sh3kbp1	2.0668e-114	0.835996	0.669	0.402	4.20676e-110	Adipocyte	Sh3kbp1
Utrn	2.72716e-114	0.658127	0.874	0.742	5.55087e-110	Adipocyte	Utrn
4930402H24Rik	2.24536e-113	0.81345	0.699	0.475	4.5702e-109	Adipocyte	4930402H24Rik
A530065N20Rik	2.48214e-113	1.59607	0.276	0.037	5.05215e-109	Adipocyte	A530065N20Rik
Prkd1	3.5642e-113	1.02031	0.61	0.34	7.25458e-109	Adipocyte	Prkd1
Pdzrn3	6.23415e-113	0.967675	0.498	0.216	1.2689e-108	Adipocyte	Pdzrn3
Nr6a1	3.15696e-112	0.860867	0.556	0.27	6.42569e-108	Adipocyte	Nr6a1
Eif4g1	6.65521e-112	0.84636	0.632	0.375	1.3546e-107	Adipocyte	Eif4g1
Taldo1	1.01711e-111	0.939999	0.336	0.08	2.07023e-107	Adipocyte	Taldo1
Atxn2	3.04837e-111	0.838379	0.716	0.532	6.20465e-107	Adipocyte	Atxn2
Rbpms2	3.91785e-111	0.993322	0.299	0.054	7.97438e-107	Adipocyte	Rbpms2
Dgkd	5.24804e-111	0.768417	0.658	0.394	1.06819e-106	Adipocyte	Dgkd
Pon3	5.80482e-111	0.93618	0.386	0.12	1.18151e-106	Adipocyte	Pon3
Ogdh	8.56543e-111	1.00312	0.625	0.396	1.74341e-106	Adipocyte	Ogdh
Enpp2	1.50049e-110	0.821193	0.47	0.188	3.0541e-106	Adipocyte	Enpp2
Fggy	1.89819e-110	0.883874	0.511	0.239	3.86357e-106	Adipocyte	Fggy
Ubr5	1.07972e-109	0.689248	0.756	0.588	2.19766e-105	Adipocyte	Ubr5
Lrig1	7.70358e-109	1.11806	0.409	0.151	1.56799e-104	Adipocyte	Lrig1
Decr1	2.36483e-108	0.929019	0.382	0.123	4.81338e-104	Adipocyte	Decr1
Fmo1	5.16903e-107	0.885773	0.538	0.254	1.0521e-102	Adipocyte	Fmo1
Dbi	1.00114e-106	0.871864	0.303	0.062	2.03772e-102	Adipocyte	Dbi
Pakap.1	5.48086e-106	0.636017	0.723	0.438	1.11557e-101	Adipocyte	Pakap.1
2210408F21Rik	8.70628e-106	0.834395	0.61	0.348	1.77208e-101	Adipocyte	2210408F21Rik
Scp2	3.16598e-105	0.93811	0.349	0.1	6.44403e-101	Adipocyte	Scp2
Cecr2	5.33327e-105	0.890793	0.447	0.171	1.08553e-100	Adipocyte	Cecr2
Syap1	1.81323e-104	0.862421	0.382	0.125	3.69064e-100	Adipocyte	Syap1
Hadh	6.13661e-104	0.897762	0.35	0.101	1.24905e-99	Adipocyte	Hadh
Trak1	1.02556e-103	0.73314	0.726	0.521	2.08743e-99	Adipocyte	Trak1
Lctl	1.16446e-103	0.976857	0.255	0.032	2.37014e-99	Adipocyte	Lctl
Mpp7	2.00965e-103	0.982761	0.532	0.282	4.09044e-99	Adipocyte	Mpp7
Eml5	2.15747e-103	0.876015	0.352	0.104	4.39131e-99	Adipocyte	Eml5
Foxo1	3.83469e-101	0.843162	0.747	0.534	7.80513e-97	Adipocyte	Foxo1
Cyth1	4.10023e-101	0.676164	0.715	0.472	8.34562e-97	Adipocyte	Cyth1
Slc20a2	1.02159e-100	0.952447	0.482	0.23	2.07935e-96	Adipocyte	Slc20a2
Mgst1	1.22748e-100	0.881038	0.35	0.109	2.49842e-96	Adipocyte	Mgst1
C9orf72	3.13863e-100	0.954721	0.371	0.128	6.38837e-96	Adipocyte	C9orf72
Hsd17b4	3.85475e-100	0.868106	0.436	0.182	7.84595e-96	Adipocyte	Hsd17b4
Akap7	7.54505e-99	0.892008	0.55	0.306	1.53572e-94	Adipocyte	Akap7
Ptpa	7.62932e-99	0.896336	0.442	0.191	1.55287e-94	Adipocyte	Ptpa
Rere	2.22863e-98	0.51775	0.921	0.844	4.53615e-94	Adipocyte	Rere
Stat5a	2.44915e-98	0.874833	0.312	0.08	4.985e-94	Adipocyte	Stat5a
Mapt	4.16426e-98	0.92518	0.303	0.068	8.47593e-94	Adipocyte	Mapt
Tbc1d4	1.3434e-97	0.732983	0.668	0.41	2.73436e-93	Adipocyte	Tbc1d4
Aspa	1.55992e-97	0.844474	0.369	0.119	3.17506e-93	Adipocyte	Aspa
Dag1	2.85954e-97	0.897762	0.531	0.279	5.82031e-93	Adipocyte	Dag1
Fhit	2.86387e-97	0.710142	0.682	0.422	5.82912e-93	Adipocyte	Fhit
Hivep2	3.34353e-97	0.60198	0.854	0.698	6.80542e-93	Adipocyte	Hivep2
Mme	5.82608e-97	0.84486	0.329	0.09	1.18584e-92	Adipocyte	Mme
Afg3l2	6.69608e-97	0.946829	0.394	0.153	1.36292e-92	Adipocyte	Afg3l2
Ppm1b	7.56838e-97	0.82007	0.595	0.367	1.54047e-92	Adipocyte	Ppm1b
Zfhx3	6.45132e-96	0.668783	0.799	0.609	1.3131e-91	Adipocyte	Zfhx3
Galm	2.1927e-95	0.976281	0.297	0.071	4.46301e-91	Adipocyte	Galm
Faf1	2.85869e-95	0.695547	0.707	0.539	5.81857e-91	Adipocyte	Faf1
Hsdl2	5.12925e-94	0.835166	0.294	0.07	1.04401e-89	Adipocyte	Hsdl2
Mif4gd	6.1321e-94	0.869178	0.292	0.069	1.24813e-89	Adipocyte	Mif4gd
Pde7b	6.98755e-94	0.668265	0.467	0.196	1.42225e-89	Adipocyte	Pde7b
Pard31	2.82798e-93	0.560427	0.746	0.471	5.75607e-89	Adipocyte	Pard3
Dcaf6	3.53836e-93	0.81597	0.623	0.399	7.20198e-89	Adipocyte	Dcaf6
Ebf21	1.17504e-92	0.374066	0.777	0.423	2.39168e-88	Adipocyte	Ebf2
Cs	1.22237e-92	0.915638	0.442	0.204	2.48801e-88	Adipocyte	Cs
Pcca	6.31627e-92	0.798295	0.613	0.395	1.28561e-87	Adipocyte	Pcca
Apmap	2.70154e-91	0.880628	0.278	0.063	5.49871e-87	Adipocyte	Apmap
Shb	7.19034e-91	1.02617	0.478	0.241	1.46352e-86	Adipocyte	Shb
Chd4	1.24279e-90	0.819548	0.633	0.407	2.52957e-86	Adipocyte	Chd4
Mecr	2.34709e-90	0.832875	0.341	0.111	4.77727e-86	Adipocyte	Mecr
4732471J01Rik	4.96091e-90	0.833849	0.452	0.206	1.00974e-85	Adipocyte	4732471J01Rik
Srrm2	6.31212e-90	0.633397	0.832	0.68	1.28477e-85	Adipocyte	Srrm2
Ccdc80	2.34823e-89	1.35799	0.42	0.198	4.7796e-85	Adipocyte	Ccdc80
Pitpnm2	4.2255e-89	0.704972	0.434	0.181	8.60058e-85	Adipocyte	Pitpnm2
Etfdh	1.67741e-88	0.871427	0.32	0.099	3.4142e-84	Adipocyte	Etfdh
Dot1l	1.02906e-87	0.805911	0.367	0.137	2.09454e-83	Adipocyte	Dot1l
Tfrc	1.07926e-87	1.01958	0.344	0.113	2.19673e-83	Adipocyte	Tfrc
Bscl2	1.70792e-87	0.806871	0.275	0.065	3.4763e-83	Adipocyte	Bscl2
Epb41	1.87758e-87	0.62537	0.626	0.372	3.82163e-83	Adipocyte	Epb41
Ube2h	5.01401e-87	0.611987	0.789	0.64	1.02055e-82	Adipocyte	Ube2h
Bcar3	8.27739e-87	1.06748	0.403	0.17	1.68478e-82	Adipocyte	Bcar3
Pex5	8.6682e-87	0.794606	0.31	0.093	1.76433e-82	Adipocyte	Pex5
Stx18	1.91423e-86	0.783814	0.479	0.24	3.89623e-82	Adipocyte	Stx18
Mettl7a1	1.95027e-86	0.826042	0.361	0.133	3.96958e-82	Adipocyte	Mettl7a1
Ptgr2	7.48104e-86	0.809339	0.328	0.109	1.52269e-81	Adipocyte	Ptgr2
Adcy5	7.58596e-86	1.30643	0.273	0.068	1.54405e-81	Adipocyte	Adcy5
Trit1	2.1714e-85	0.791417	0.366	0.14	4.41968e-81	Adipocyte	Trit1
Ank	7.56504e-85	0.887658	0.478	0.241	1.53979e-80	Adipocyte	Ank
Adam121	1.99229e-84	0.259432	0.655	0.354	4.05511e-80	Adipocyte	Adam12
Cables1	6.29548e-84	0.912059	0.438	0.206	1.28138e-79	Adipocyte	Cables1
Gm42418	7.1243e-84	0.77429	0.997	0.987	1.45008e-79	Adipocyte	Gm42418
Msra	7.73632e-84	0.821106	0.466	0.232	1.57465e-79	Adipocyte	Msra
Chchd6	1.59447e-83	0.793724	0.373	0.145	3.24538e-79	Adipocyte	Chchd6
Parm1	5.91672e-82	1.27616	0.265	0.065	1.20429e-77	Adipocyte	Parm1
Rreb1	1.6335e-81	0.500476	0.798	0.635	3.32482e-77	Adipocyte	Rreb1
Etfb	3.29839e-81	0.709423	0.256	0.057	6.71354e-77	Adipocyte	Etfb
2023-03-05	6.93547e-81	0.750428	0.421	0.198	1.41164e-76	Adipocyte	2023-03-05
Mtch2	1.51185e-80	0.755667	0.401	0.175	3.07723e-76	Adipocyte	Mtch2
Cebpb	2.00447e-80	0.913336	0.293	0.087	4.07989e-76	Adipocyte	Cebpb
Cmtm4	3.38923e-80	0.818575	0.343	0.122	6.89843e-76	Adipocyte	Cmtm4
Msi2	3.88454e-80	0.579455	0.783	0.597	7.9066e-76	Adipocyte	Msi2
Ell2	3.92525e-80	0.85474	0.446	0.224	7.98946e-76	Adipocyte	Ell2
Vps13a	4.06463e-80	0.678309	0.634	0.413	8.27315e-76	Adipocyte	Vps13a
Nfyc	5.09314e-80	0.824131	0.532	0.321	1.03666e-75	Adipocyte	Nfyc
Pald1	5.39855e-80	0.956336	0.368	0.152	1.09882e-75	Adipocyte	Pald1
Resf1	8.9329e-80	1.03423	0.508	0.3	1.8182e-75	Adipocyte	Resf1
Agl	3.2512e-79	0.856992	0.389	0.172	6.61749e-75	Adipocyte	Agl
Isoc2a	1.0054e-78	0.809325	0.271	0.071	2.04639e-74	Adipocyte	Isoc2a
Mccc2	1.38422e-78	0.796864	0.329	0.12	2.81743e-74	Adipocyte	Mccc2
Tmem245	2.84722e-78	0.658293	0.562	0.344	5.79523e-74	Adipocyte	Tmem245
Ankrd17	8.5642e-78	0.554603	0.813	0.722	1.74316e-73	Adipocyte	Ankrd17
Nr3c2	1.897e-77	0.727893	0.665	0.457	3.86116e-73	Adipocyte	Nr3c2
Syne2	3.58999e-77	0.429435	0.722	0.471	7.30706e-73	Adipocyte	Syne2
Rsrp1	5.27286e-77	0.588242	0.828	0.674	1.07324e-72	Adipocyte	Rsrp1
Mbnl2	8.82153e-77	0.567981	0.823	0.722	1.79553e-72	Adipocyte	Mbnl2
Sod2	2.50837e-76	0.783831	0.344	0.134	5.10554e-72	Adipocyte	Sod2
Pygl	3.17627e-76	0.897874	0.313	0.11	6.46499e-72	Adipocyte	Pygl
Pdha1	6.16583e-76	0.793199	0.302	0.1	1.25499e-71	Adipocyte	Pdha1
Micall1	1.05568e-75	0.828177	0.335	0.127	2.14874e-71	Adipocyte	Micall1
Dock9	1.09212e-75	0.629285	0.702	0.481	2.22289e-71	Adipocyte	Dock9
A530020G20Rik	1.90524e-75	0.785122	0.364	0.154	3.87792e-71	Adipocyte	A530020G20Rik
Plcb1	1.24127e-74	0.344634	0.635	0.389	2.52647e-70	Adipocyte	Plcb1
Tmed5	2.87712e-74	0.828814	0.377	0.166	5.85608e-70	Adipocyte	Tmed5
Ivd	3.27387e-74	0.844814	0.354	0.149	6.66363e-70	Adipocyte	Ivd
Sun2	3.65605e-74	0.731831	0.261	0.07	7.44152e-70	Adipocyte	Sun2
Itpk1	8.48419e-74	0.97552	0.477	0.272	1.72687e-69	Adipocyte	Itpk1
2023-03-03	1.07303e-73	0.846665	0.615	0.406	2.18404e-69	Adipocyte	2023-03-03
Cog4	1.12878e-73	0.758591	0.433	0.219	2.29753e-69	Adipocyte	Cog4
Cobll1	1.7556e-73	0.463236	0.462	0.216	3.57335e-69	Adipocyte	Cobll1
Crls1	1.92194e-73	0.819553	0.276	0.085	3.91191e-69	Adipocyte	Crls1
Elmod3	4.0916e-73	0.736734	0.285	0.089	8.32805e-69	Adipocyte	Elmod3
Angptl4	9.673e-73	0.742619	0.304	0.105	1.96884e-68	Adipocyte	Angptl4
Prpf4b	2.42131e-72	0.668326	0.624	0.416	4.92834e-68	Adipocyte	Prpf4b
Aqp7	2.79265e-72	0.571086	0.263	0.069	5.68415e-68	Adipocyte	Aqp7
Cpeb4	4.10734e-72	0.757941	0.502	0.299	8.36009e-68	Adipocyte	Cpeb4
Cmc1	6.56614e-72	0.788966	0.344	0.141	1.33647e-67	Adipocyte	Cmc1
Chst11	1.03608e-71	0.775981	0.47	0.245	2.10884e-67	Adipocyte	Chst11
Vkorc1l1	5.2559e-71	0.727114	0.515	0.305	1.06979e-66	Adipocyte	Vkorc1l1
Pcsk6	5.8459e-71	0.448857	0.425	0.189	1.18987e-66	Adipocyte	Pcsk6
Adcy3	1.09715e-70	0.915353	0.322	0.125	2.23314e-66	Adipocyte	Adcy3
Dagla	1.52471e-70	0.831639	0.272	0.085	3.10339e-66	Adipocyte	Dagla
Focad	3.25356e-70	0.713283	0.425	0.211	6.62229e-66	Adipocyte	Focad
Epb41l1	3.74752e-70	0.588066	0.498	0.265	7.62769e-66	Adipocyte	Epb41l1
9530026P05Rik	4.64087e-70	0.34123	0.691	0.409	9.44602e-66	Adipocyte	9530026P05Rik
Ndufs3	8.08754e-70	0.730254	0.325	0.126	1.64614e-65	Adipocyte	Ndufs3
Caprin1	8.26214e-70	0.697379	0.576	0.399	1.68168e-65	Adipocyte	Caprin1
Acbd4	8.5804e-70	0.672727	0.264	0.078	1.74645e-65	Adipocyte	Acbd4
Camsap2	1.12312e-69	0.715413	0.451	0.243	2.286e-65	Adipocyte	Camsap2
Lgr4	1.29323e-69	0.702983	0.37	0.162	2.63225e-65	Adipocyte	Lgr4
Anxa6	1.57728e-69	0.738188	0.427	0.224	3.21039e-65	Adipocyte	Anxa6
Aldoa	6.56808e-69	0.71459	0.269	0.082	1.33687e-64	Adipocyte	Aldoa
Arhgap5	2.05335e-68	0.658597	0.543	0.337	4.17939e-64	Adipocyte	Arhgap5
Pcsk5	7.37628e-68	0.639752	0.462	0.234	1.50137e-63	Adipocyte	Pcsk5
Ebf3	1.6473e-67	0.575745	0.574	0.34	3.35292e-63	Adipocyte	Ebf3
Ntrk2	1.90914e-67	0.802232	0.325	0.128	3.88586e-63	Adipocyte	Ntrk2
Hmgcs1	2.90435e-67	0.706201	0.25	0.073	5.91151e-63	Adipocyte	Hmgcs1
Galnt2	2.96307e-67	0.702062	0.487	0.278	6.03104e-63	Adipocyte	Galnt2
Asph	3.14618e-67	0.922621	0.54	0.354	6.40373e-63	Adipocyte	Asph
Podn	5.1517e-67	0.747515	0.338	0.139	1.04858e-62	Adipocyte	Podn
Lin52	1.64179e-66	0.697373	0.465	0.257	3.3417e-62	Adipocyte	Lin52
Clpx	1.96968e-66	0.705434	0.428	0.227	4.00909e-62	Adipocyte	Clpx
Smad6	3.49544e-66	0.764564	0.387	0.186	7.11462e-62	Adipocyte	Smad6
Pabpn1	2.38152e-65	0.698726	0.578	0.388	4.84734e-61	Adipocyte	Pabpn1
Cpped1	3.46289e-65	0.693387	0.406	0.204	7.04836e-61	Adipocyte	Cpped1
Ifi27	4.44181e-65	0.659963	0.28	0.096	9.04086e-61	Adipocyte	Ifi27
Dlst	2.28947e-64	0.728981	0.404	0.208	4.65998e-60	Adipocyte	Dlst
Golga4	2.44802e-64	0.631821	0.547	0.349	4.98269e-60	Adipocyte	Golga4
Klhl2	5.21483e-64	0.817057	0.467	0.278	1.06143e-59	Adipocyte	Klhl2
Sfxn1	6.85574e-64	0.705116	0.394	0.196	1.39542e-59	Adipocyte	Sfxn1
Atp9a	7.64879e-64	0.608747	0.321	0.126	1.55683e-59	Adipocyte	Atp9a
Lrrc58	8.95163e-64	0.705512	0.43	0.235	1.82202e-59	Adipocyte	Lrrc58
Kansl1l	4.55199e-63	0.659435	0.58	0.392	9.26512e-59	Adipocyte	Kansl1l
Qk	5.58868e-63	0.443736	0.82	0.749	1.13752e-58	Adipocyte	Qk
Met	7.00137e-63	0.670306	0.302	0.116	1.42506e-58	Adipocyte	Met
Nadk	7.86444e-63	0.615377	0.496	0.287	1.60073e-58	Adipocyte	Nadk
Pex1	8.03451e-63	0.667352	0.311	0.124	1.63534e-58	Adipocyte	Pex1
Hivep1	9.47479e-63	0.687262	0.527	0.332	1.9285e-58	Adipocyte	Hivep1
Stk11	2.64442e-62	0.719832	0.394	0.196	5.38246e-58	Adipocyte	Stk11
1110019D14Rik	4.45092e-62	0.719561	0.283	0.104	9.05941e-58	Adipocyte	1110019D14Rik
Mcur1	1.08942e-61	0.627554	0.276	0.099	2.2174e-57	Adipocyte	Mcur1
Slc22a5	1.28485e-61	0.782818	0.37	0.183	2.61518e-57	Adipocyte	Slc22a5
Pag1	1.32396e-61	0.708761	0.394	0.196	2.69478e-57	Adipocyte	Pag1
Afg1l	3.06237e-61	0.666101	0.451	0.25	6.23315e-57	Adipocyte	Afg1l
Slc12a7	4.24558e-61	0.728667	0.294	0.112	8.64146e-57	Adipocyte	Slc12a7
Kif1c	8.73611e-61	0.649728	0.333	0.147	1.77815e-56	Adipocyte	Kif1c
Pdhb	1.01453e-60	0.621641	0.259	0.085	2.06498e-56	Adipocyte	Pdhb
Prpf38b	1.06387e-60	0.66388	0.631	0.443	2.1654e-56	Adipocyte	Prpf38b
Scarf1	1.7254e-60	0.712239	0.279	0.1	3.51188e-56	Adipocyte	Scarf1
Eepd1	2.17425e-60	0.951443	0.4	0.212	4.42546e-56	Adipocyte	Eepd1
Ganc	2.35481e-60	0.634732	0.296	0.116	4.79297e-56	Adipocyte	Ganc
Pnpla8	4.23412e-60	0.661984	0.47	0.279	8.61813e-56	Adipocyte	Pnpla8
Tom1l2	5.1134e-60	0.621285	0.645	0.473	1.04078e-55	Adipocyte	Tom1l2
Dhrs7b	7.5312e-60	0.63628	0.266	0.095	1.5329e-55	Adipocyte	Dhrs7b
Vcl	1.10278e-59	0.756704	0.461	0.274	2.2446e-55	Adipocyte	Vcl
Kif21a	1.81088e-59	0.633072	0.252	0.082	3.68587e-55	Adipocyte	Kif21a
Ehmt1	4.4034e-59	0.582913	0.7	0.563	8.96268e-55	Adipocyte	Ehmt1
Phka2	5.69053e-59	0.720685	0.453	0.27	1.15825e-54	Adipocyte	Phka2
Rhoq	5.85331e-59	0.663693	0.526	0.345	1.19138e-54	Adipocyte	Rhoq
Lzts2	7.16436e-59	0.6279	0.307	0.126	1.45823e-54	Adipocyte	Lzts2
Maob	1.19686e-58	0.650154	0.275	0.1	2.43608e-54	Adipocyte	Maob
Tapt1	2.43299e-58	0.638921	0.348	0.163	4.95212e-54	Adipocyte	Tapt1
Gtf2i	2.85177e-58	0.625718	0.558	0.371	5.8045e-54	Adipocyte	Gtf2i
Gnas	3.89627e-58	1.01749	0.622	0.467	7.93047e-54	Adipocyte	Gnas
Ahcyl1	1.2437e-57	0.728595	0.508	0.331	2.53142e-53	Adipocyte	Ahcyl1
Arhgap26	3.01702e-57	0.435763	0.721	0.525	6.14084e-53	Adipocyte	Arhgap26
Afap1	3.19658e-57	0.652571	0.49	0.303	6.50633e-53	Adipocyte	Afap1
Lpcat3	6.22189e-57	0.673654	0.375	0.187	1.2664e-52	Adipocyte	Lpcat3
Mmaa	7.85654e-57	0.618485	0.278	0.106	1.59912e-52	Adipocyte	Mmaa
Kank1	1.93873e-56	0.359998	0.389	0.18	3.94608e-52	Adipocyte	Kank1
Urgcp	1.09059e-55	0.628206	0.496	0.313	2.21979e-51	Adipocyte	Urgcp
Bcl9l	1.10454e-55	0.62362	0.349	0.167	2.24817e-51	Adipocyte	Bcl9l
Uqcc1	8.6759e-55	0.635672	0.415	0.23	1.76589e-50	Adipocyte	Uqcc1
Ndufs1	1.27889e-54	0.582396	0.397	0.211	2.60305e-50	Adipocyte	Ndufs1
Gnai1	2.26124e-54	0.648556	0.299	0.124	4.60252e-50	Adipocyte	Gnai1
Atrn	1.55986e-53	0.539305	0.462	0.273	3.17494e-49	Adipocyte	Atrn
Arel1	2.39511e-53	0.608123	0.33	0.155	4.87501e-49	Adipocyte	Arel1
Hspa9	2.98472e-53	0.625513	0.339	0.163	6.0751e-49	Adipocyte	Hspa9
Erc1	8.95408e-53	0.533687	0.506	0.315	1.82251e-48	Adipocyte	Erc1
Cyb5b	9.14915e-53	0.672191	0.4	0.228	1.86222e-48	Adipocyte	Cyb5b
Pygb	1.32876e-52	0.699861	0.32	0.153	2.70457e-48	Adipocyte	Pygb
Pde1a	1.94678e-52	0.554229	0.465	0.269	3.96248e-48	Adipocyte	Pde1a
2700097O09Rik	3.78491e-52	0.574748	0.333	0.154	7.70381e-48	Adipocyte	2700097O09Rik
Ldah	5.95507e-52	0.604852	0.425	0.244	1.21209e-47	Adipocyte	Ldah
Osbpl1a	6.31481e-52	0.665616	0.435	0.256	1.28532e-47	Adipocyte	Osbpl1a
Vldlr	7.08229e-52	0.595087	0.257	0.097	1.44153e-47	Adipocyte	Vldlr
Pum1	1.33211e-51	0.546341	0.66	0.533	2.71137e-47	Adipocyte	Pum1
Bckdha	2.68682e-51	0.616536	0.271	0.109	5.46875e-47	Adipocyte	Bckdha
Stard13	3.17543e-51	0.475346	0.604	0.405	6.46327e-47	Adipocyte	Stard13
Ywhab	4.04392e-51	0.594929	0.372	0.197	8.23099e-47	Adipocyte	Ywhab
Suclg1	6.88363e-51	0.628609	0.255	0.099	1.40109e-46	Adipocyte	Suclg1
Fign	8.46959e-51	0.635216	0.35	0.173	1.7239e-46	Adipocyte	Fign
Mtor	1.01085e-50	0.657843	0.421	0.251	2.05748e-46	Adipocyte	Mtor
Tomm40	1.51495e-50	0.553894	0.276	0.114	3.08353e-46	Adipocyte	Tomm40
Adcy9	1.61956e-50	0.641745	0.633	0.459	3.29646e-46	Adipocyte	Adcy9
Larp4	2.07849e-50	0.572179	0.441	0.261	4.23056e-46	Adipocyte	Larp4
Tln2	3.93947e-50	0.535411	0.308	0.136	8.01839e-46	Adipocyte	Tln2
Lncpint	7.01165e-50	0.385789	0.894	0.819	1.42715e-45	Adipocyte	Lncpint
Tacc1	1.71922e-49	0.596987	0.722	0.59	3.4993e-45	Adipocyte	Tacc1
Tead1	4.10266e-49	0.669869	0.58	0.404	8.35056e-45	Adipocyte	Tead1
Maco1	5.04182e-49	0.610044	0.377	0.207	1.02621e-44	Adipocyte	Maco1
Zkscan3	8.10558e-49	0.549686	0.452	0.28	1.64981e-44	Adipocyte	Zkscan3
Rtn3	8.24151e-49	0.495314	0.706	0.597	1.67748e-44	Adipocyte	Rtn3
Prkaca	9.03823e-49	0.504226	0.25	0.097	1.83964e-44	Adipocyte	Prkaca
Slmap	9.45172e-49	0.512332	0.643	0.497	1.9238e-44	Adipocyte	Slmap
Dnajb4	1.36987e-48	0.483215	0.255	0.1	2.78823e-44	Adipocyte	Dnajb4
Vps13d	2.34935e-48	0.504302	0.633	0.483	4.78186e-44	Adipocyte	Vps13d
Acaa2	2.72218e-48	0.710031	0.285	0.13	5.54073e-44	Adipocyte	Acaa2
N4bp2l1	2.74973e-48	0.459035	0.382	0.204	5.5968e-44	Adipocyte	N4bp2l1
Nmnat3	3.1903e-48	0.633629	0.367	0.197	6.49353e-44	Adipocyte	Nmnat3
Irs2	5.48835e-48	0.834032	0.252	0.104	1.1171e-43	Adipocyte	Irs2
Esr1	6.02676e-48	0.647373	0.49	0.316	1.22669e-43	Adipocyte	Esr1
Wipi2	6.59888e-48	0.668475	0.336	0.172	1.34314e-43	Adipocyte	Wipi2
Reep5	1.59902e-47	0.569009	0.29	0.133	3.25466e-43	Adipocyte	Reep5
Cox10	1.6002e-47	0.633429	0.291	0.135	3.25704e-43	Adipocyte	Cox10
Pnisr	3.16781e-47	0.50988	0.785	0.691	6.44776e-43	Adipocyte	Pnisr
Slc25a26	7.62833e-47	0.576363	0.286	0.131	1.55267e-42	Adipocyte	Slc25a26
Fut8	8.65745e-47	0.525856	0.585	0.415	1.76214e-42	Adipocyte	Fut8
Atg10	9.06702e-47	0.51395	0.578	0.411	1.8455e-42	Adipocyte	Atg10
C330007P06Rik	1.00429e-46	0.592586	0.292	0.135	2.04414e-42	Adipocyte	C330007P06Rik
Atp5f1	1.1199e-46	0.527049	0.299	0.141	2.27945e-42	Adipocyte	Atp5f1
Cavin2	1.92616e-46	0.43081	0.34	0.164	3.9205e-42	Adipocyte	Cavin2
Ophn1	2.3283e-46	0.388856	0.674	0.498	4.73902e-42	Adipocyte	Ophn1
Gramd1a	2.66091e-46	0.616519	0.343	0.18	5.41602e-42	Adipocyte	Gramd1a
Sulf2	2.97468e-46	0.598246	0.369	0.204	6.05467e-42	Adipocyte	Sulf2
Ahcyl2	6.558e-46	0.445933	0.551	0.372	1.33482e-41	Adipocyte	Ahcyl2
Bmpr1a	7.38803e-46	0.515014	0.488	0.308	1.50376e-41	Adipocyte	Bmpr1a
Gpbp1l1	1.29509e-45	0.558056	0.48	0.316	2.63603e-41	Adipocyte	Gpbp1l1
Atxn1	2.17326e-45	0.357001	0.827	0.699	4.42345e-41	Adipocyte	Atxn1
Amy1	2.25344e-45	0.557358	0.307	0.147	4.58665e-41	Adipocyte	Amy1
Mapk6	5.14777e-45	0.591914	0.294	0.141	1.04778e-40	Adipocyte	Mapk6
Kctd3	8.44925e-45	0.549732	0.29	0.138	1.71976e-40	Adipocyte	Kctd3
Rnf144a	1.41105e-44	0.531456	0.337	0.172	2.87205e-40	Adipocyte	Rnf144a
Atp5c1	1.8318e-44	0.528457	0.326	0.165	3.72844e-40	Adipocyte	Atp5c1
Nfe2l1	4.07163e-44	0.605097	0.284	0.132	8.2874e-40	Adipocyte	Nfe2l1
Mef2d	4.4906e-44	0.561123	0.468	0.3	9.14017e-40	Adipocyte	Mef2d
Zfp395	9.05323e-44	0.524424	0.336	0.177	1.84269e-39	Adipocyte	Zfp395
Adcy6	1.00606e-43	0.499061	0.334	0.17	2.04774e-39	Adipocyte	Adcy6
Mtss1	1.19025e-43	0.322569	0.725	0.544	2.42263e-39	Adipocyte	Mtss1
Svep11	1.40743e-43	0.326129	0.536	0.325	2.86468e-39	Adipocyte	Svep1
Tex2	1.80323e-43	0.592109	0.429	0.265	3.67029e-39	Adipocyte	Tex2
Timm23	4.64366e-43	0.479174	0.281	0.13	9.45171e-39	Adipocyte	Timm23
Ccl25	4.95974e-43	0.527551	0.304	0.15	1.00951e-38	Adipocyte	Ccl25
Apex2	1.83366e-42	0.642601	0.397	0.243	3.73224e-38	Adipocyte	Apex2
Ubac1	2.07899e-42	0.497898	0.255	0.113	4.23158e-38	Adipocyte	Ubac1
Per3	7.44375e-42	0.478077	0.27	0.123	1.5151e-37	Adipocyte	Per3
Wwox	1.46551e-41	0.346136	0.84	0.716	2.98291e-37	Adipocyte	Wwox
Mcph1	2.79204e-41	0.54468	0.325	0.173	5.68293e-37	Adipocyte	Mcph1
Lrpprc	3.96926e-41	0.619578	0.339	0.191	8.07903e-37	Adipocyte	Lrpprc
Glrx3	7.91537e-41	0.5407	0.329	0.177	1.6111e-36	Adipocyte	Glrx3
Psmd4	1.04558e-40	0.5	0.299	0.15	2.12817e-36	Adipocyte	Psmd4
Fam117a	1.10553e-40	0.581055	0.301	0.154	2.2502e-36	Adipocyte	Fam117a
Mtx2	1.13454e-40	0.506171	0.32	0.168	2.30925e-36	Adipocyte	Mtx2
Pex6	1.47057e-40	0.534616	0.251	0.112	2.99319e-36	Adipocyte	Pex6
Nhsl2	1.49931e-40	0.479978	0.397	0.23	3.05169e-36	Adipocyte	Nhsl2
Jarid2	1.93913e-40	0.437318	0.725	0.591	3.94691e-36	Adipocyte	Jarid2
Mgmt	2.69498e-40	0.552375	0.312	0.16	5.48536e-36	Adipocyte	Mgmt
2023-03-02	3.65095e-40	0.571539	0.293	0.148	7.43113e-36	Adipocyte	2023-03-02
Fzd4	3.75783e-40	0.448106	0.292	0.141	7.64869e-36	Adipocyte	Fzd4
Acer2	3.87402e-40	0.343518	0.283	0.129	7.88517e-36	Adipocyte	Acer2
Tbc1d20	4.419e-40	0.519721	0.259	0.12	8.99443e-36	Adipocyte	Tbc1d20
Lamb1	9.23207e-40	0.500437	0.4	0.239	1.8791e-35	Adipocyte	Lamb1
Baz1b	9.9695e-40	0.478734	0.586	0.438	2.02919e-35	Adipocyte	Baz1b
Trabd2b	2.31588e-39	0.774391	0.316	0.173	4.71373e-35	Adipocyte	Trabd2b
Hnrnpu	2.63605e-39	0.440808	0.673	0.558	5.36542e-35	Adipocyte	Hnrnpu
Taf1d	3.19774e-39	0.509277	0.311	0.165	6.50868e-35	Adipocyte	Taf1d
Suclg2	4.35087e-39	0.506926	0.463	0.304	8.85576e-35	Adipocyte	Suclg2
Dcun1d4	7.08347e-39	0.485626	0.253	0.116	1.44177e-34	Adipocyte	Dcun1d4
Ube2g1	7.96959e-39	0.479552	0.525	0.37	1.62213e-34	Adipocyte	Ube2g1
Immt	1.00302e-38	0.512171	0.364	0.212	2.04154e-34	Adipocyte	Immt
Usp33	1.05727e-38	0.499593	0.465	0.313	2.15197e-34	Adipocyte	Usp33
Sil1	1.28313e-38	0.457801	0.452	0.293	2.61169e-34	Adipocyte	Sil1
Snrk	3.08404e-38	0.312862	0.564	0.383	6.27726e-34	Adipocyte	Snrk
5031425E22Rik	3.22658e-38	0.498394	0.603	0.47	6.56737e-34	Adipocyte	5031425E22Rik
Clec16a	4.30186e-38	0.440477	0.403	0.247	8.756e-34	Adipocyte	Clec16a
Nacc2	6.65776e-38	0.452816	0.282	0.141	1.35512e-33	Adipocyte	Nacc2
Dlg2	9.23065e-38	0.441561	0.344	0.189	1.87881e-33	Adipocyte	Dlg2
Rcbtb2	1.16666e-37	0.463825	0.316	0.17	2.37462e-33	Adipocyte	Rcbtb2
Vps13c	2.71172e-37	0.432758	0.529	0.376	5.51943e-33	Adipocyte	Vps13c
Ndufv2	4.60552e-37	0.475569	0.319	0.174	9.37407e-33	Adipocyte	Ndufv2
Sec61a2	6.59505e-37	0.455066	0.31	0.168	1.34236e-32	Adipocyte	Sec61a2
Atp5b	7.06294e-37	0.468548	0.288	0.148	1.43759e-32	Adipocyte	Atp5b
Khdrbs3	1.46332e-36	0.673237	0.251	0.124	2.97844e-32	Adipocyte	Khdrbs3
Ctif	2.70848e-36	0.405007	0.497	0.341	5.51283e-32	Adipocyte	Ctif
Dnajc11	3.08687e-36	0.534588	0.287	0.151	6.28301e-32	Adipocyte	Dnajc11
Znrf3	3.80848e-36	0.411193	0.423	0.26	7.75179e-32	Adipocyte	Znrf3
Pkm	5.07863e-36	0.569593	0.262	0.134	1.0337e-31	Adipocyte	Pkm
Atp5a1	6.32746e-36	0.522729	0.27	0.137	1.28789e-31	Adipocyte	Atp5a1
Crem	1.0288e-35	0.512465	0.304	0.166	2.09403e-31	Adipocyte	Crem
Stk40	1.07814e-35	0.470335	0.284	0.147	2.19444e-31	Adipocyte	Stk40
Paip2	1.48076e-35	0.487411	0.443	0.294	3.01394e-31	Adipocyte	Paip2
Fermt2	2.02806e-35	0.445394	0.484	0.326	4.12792e-31	Adipocyte	Fermt2
Iars2	2.04953e-35	0.479047	0.313	0.172	4.17161e-31	Adipocyte	Iars2
Dym	6.27518e-35	0.455524	0.553	0.407	1.27725e-30	Adipocyte	Dym
Gpx4	7.97381e-35	0.472919	0.263	0.13	1.62299e-30	Adipocyte	Gpx4
1700012D14Rik	1.80017e-34	0.573101	0.298	0.164	3.66406e-30	Adipocyte	1700012D14Rik
Ube4b	3.03426e-34	0.478712	0.565	0.429	6.17593e-30	Adipocyte	Ube4b
Sdha	4.93448e-34	0.468466	0.386	0.242	1.00436e-29	Adipocyte	Sdha
Sec24b	4.95253e-34	0.490889	0.536	0.412	1.00804e-29	Adipocyte	Sec24b
Dtnbp1	5.67553e-34	0.425761	0.491	0.347	1.1552e-29	Adipocyte	Dtnbp1
Acbd5	6.57728e-34	0.449754	0.412	0.264	1.33874e-29	Adipocyte	Acbd5
Fam120c	9.66655e-34	0.514272	0.347	0.212	1.96753e-29	Adipocyte	Fam120c
Mipol1	1.02774e-33	0.505516	0.323	0.186	2.09187e-29	Adipocyte	Mipol1
Nudt13	1.17035e-33	0.436606	0.267	0.136	2.38213e-29	Adipocyte	Nudt13
Uqcrc2	1.42231e-33	0.460938	0.298	0.165	2.89496e-29	Adipocyte	Uqcrc2
Ptpn11	1.63014e-33	0.464812	0.336	0.195	3.31799e-29	Adipocyte	Ptpn11
Snta1	1.91631e-33	0.512757	0.287	0.156	3.90045e-29	Adipocyte	Snta1
Ggnbp2	2.04396e-33	0.425164	0.613	0.486	4.16028e-29	Adipocyte	Ggnbp2
Ubr4	2.4767e-33	0.46937	0.406	0.261	5.04107e-29	Adipocyte	Ubr4
Ranbp9	2.51479e-33	0.455491	0.606	0.484	5.11861e-29	Adipocyte	Ranbp9
Tnfaip8	2.54171e-33	0.430014	0.538	0.385	5.17341e-29	Adipocyte	Tnfaip8
Znrf1	3.55517e-33	0.459949	0.533	0.398	7.23619e-29	Adipocyte	Znrf1
Zfp438	3.56832e-33	0.445367	0.287	0.153	7.26296e-29	Adipocyte	Zfp438
Mapkapk2	3.87891e-33	0.612684	0.395	0.26	7.89513e-29	Adipocyte	Mapkapk2
Srsf11	4.23358e-33	0.421394	0.645	0.529	8.61703e-29	Adipocyte	Srsf11
Nrbp2	6.89821e-33	0.495806	0.296	0.163	1.40406e-28	Adipocyte	Nrbp2
Mark2	1.87548e-32	0.43267	0.621	0.506	3.81736e-28	Adipocyte	Mark2
Kif16b	2.97498e-32	0.439256	0.478	0.336	6.05527e-28	Adipocyte	Kif16b
Wapl	3.93426e-32	0.400292	0.628	0.505	8.0078e-28	Adipocyte	Wapl
Dido1	5.19693e-32	0.422509	0.475	0.34	1.05778e-27	Adipocyte	Dido1
Sec22a	6.30183e-32	0.47453	0.321	0.19	1.28267e-27	Adipocyte	Sec22a
Gnao1	6.95605e-32	0.480861	0.317	0.181	1.41584e-27	Adipocyte	Gnao1
Ilrun	7.71321e-32	0.468444	0.415	0.276	1.56995e-27	Adipocyte	Ilrun
Oxct1	8.67717e-32	0.526581	0.38	0.245	1.76615e-27	Adipocyte	Oxct1
Ppm1a	1.14e-31	0.427533	0.389	0.248	2.32036e-27	Adipocyte	Ppm1a
Snx10	1.35219e-31	0.489311	0.441	0.305	2.75224e-27	Adipocyte	Snx10
Ndel1	2.32174e-31	0.446928	0.405	0.266	4.72566e-27	Adipocyte	Ndel1
Irak2	2.53945e-31	0.411662	0.385	0.243	5.1688e-27	Adipocyte	Irak2
Bfar	2.89812e-31	0.480588	0.309	0.18	5.89883e-27	Adipocyte	Bfar
Lrmda	2.95507e-31	0.28299	0.856	0.761	6.01474e-27	Adipocyte	Lrmda
Stt3b	2.98175e-31	0.493976	0.429	0.296	6.06906e-27	Adipocyte	Stt3b
Cdk12	4.53671e-31	0.418959	0.598	0.474	9.23401e-27	Adipocyte	Cdk12
Nrp1	6.67564e-31	0.289271	0.745	0.598	1.35876e-26	Adipocyte	Nrp1
Taf15	8.13458e-31	0.437781	0.563	0.44	1.65571e-26	Adipocyte	Taf15
Psmd11	9.66911e-31	0.435873	0.358	0.222	1.96805e-26	Adipocyte	Psmd11
Zc3h6	9.9389e-31	0.521719	0.323	0.196	2.02296e-26	Adipocyte	Zc3h6
Rmdn1	1.07628e-30	0.462128	0.34	0.207	2.19066e-26	Adipocyte	Rmdn1
Gfm2	1.15169e-30	0.410742	0.33	0.195	2.34415e-26	Adipocyte	Gfm2
Srpk2	1.29058e-30	0.439982	0.555	0.432	2.62685e-26	Adipocyte	Srpk2
Nup188	1.81743e-30	0.394646	0.268	0.142	3.69919e-26	Adipocyte	Nup188
Pcf11	2.16413e-30	0.449241	0.449	0.316	4.40487e-26	Adipocyte	Pcf11
Clpb	3.683e-30	0.397455	0.25	0.129	7.49637e-26	Adipocyte	Clpb
Gpi1	3.77612e-30	0.525018	0.318	0.192	7.68591e-26	Adipocyte	Gpi1
Zhx2	4.39747e-30	0.374037	0.532	0.39	8.95061e-26	Adipocyte	Zhx2
Ikzf2	4.90718e-30	0.387392	0.347	0.207	9.98808e-26	Adipocyte	Ikzf2
Macrod2	7.94044e-30	0.304986	0.351	0.211	1.6162e-25	Adipocyte	Macrod2
Ylpm1	9.33689e-30	0.418275	0.533	0.406	1.90043e-25	Adipocyte	Ylpm1
1600020E01Rik	1.1311e-29	0.475071	0.267	0.146	2.30224e-25	Adipocyte	1600020E01Rik
Tnks2	1.37269e-29	0.419103	0.583	0.462	2.79398e-25	Adipocyte	Tnks2
Ric8b	1.44981e-29	0.44265	0.404	0.276	2.95095e-25	Adipocyte	Ric8b
Atf2	2.49694e-29	0.488277	0.521	0.401	5.08228e-25	Adipocyte	Atf2
Tomm70a	3.44371e-29	0.42532	0.337	0.209	7.00934e-25	Adipocyte	Tomm70a
Safb2	8.48028e-29	0.468368	0.453	0.323	1.72608e-24	Adipocyte	Safb2
Stard7	8.52339e-29	0.415709	0.305	0.178	1.73485e-24	Adipocyte	Stard7
Idh1	2.00955e-28	0.428057	0.329	0.203	4.09024e-24	Adipocyte	Idh1
Mafg	2.18752e-28	0.408826	0.34	0.21	4.45249e-24	Adipocyte	Mafg
Atf1	2.65395e-28	0.450534	0.372	0.242	5.40185e-24	Adipocyte	Atf1
Gm20732	3.43455e-28	0.4434	0.393	0.267	6.99069e-24	Adipocyte	Gm20732
Atp2b4	5.82722e-28	0.672533	0.3	0.189	1.18607e-23	Adipocyte	Atp2b4
Arfgef2	6.23743e-28	0.432087	0.467	0.336	1.26957e-23	Adipocyte	Arfgef2
Ddhd1	6.62704e-28	0.317697	0.488	0.35	1.34887e-23	Adipocyte	Ddhd1
Lrp12	7.56401e-28	0.40935	0.26	0.142	1.53958e-23	Adipocyte	Lrp12
Cdc27	1.57265e-27	0.40128	0.396	0.267	3.20097e-23	Adipocyte	Cdc27
Myl6	1.8156e-27	0.325402	0.267	0.146	3.69547e-23	Adipocyte	Myl6
Bcap31	1.91726e-27	0.364655	0.288	0.165	3.9024e-23	Adipocyte	Bcap31
Phrf1	2.84871e-27	0.412942	0.293	0.172	5.79827e-23	Adipocyte	Phrf1
Ccdc191	3.7513e-27	0.381775	0.26	0.144	7.6354e-23	Adipocyte	Ccdc191
Rad54l2	5.14815e-27	0.429501	0.325	0.202	1.04786e-22	Adipocyte	Rad54l2
Rai1	5.20602e-27	0.400963	0.531	0.404	1.05963e-22	Adipocyte	Rai1
Srek1	5.52432e-27	0.375541	0.618	0.496	1.12442e-22	Adipocyte	Srek1
Micos10	5.65857e-27	0.425848	0.28	0.164	1.15175e-22	Adipocyte	Micos10
Dcaf8	7.22357e-27	0.419006	0.47	0.344	1.47029e-22	Adipocyte	Dcaf8
Pde8a	7.26713e-27	0.378084	0.469	0.336	1.47915e-22	Adipocyte	Pde8a
Xpnpep3	7.33597e-27	0.355841	0.265	0.147	1.49316e-22	Adipocyte	Xpnpep3
Ppp1r10	1.00231e-26	0.423791	0.296	0.177	2.0401e-22	Adipocyte	Ppp1r10
Pcgf5	1.02906e-26	0.312729	0.392	0.261	2.09455e-22	Adipocyte	Pcgf5
Rbfox21	1.41157e-26	0.276798	0.702	0.558	2.8731e-22	Adipocyte	Rbfox2
Oip5os1	1.51877e-26	0.412299	0.339	0.217	3.0913e-22	Adipocyte	Oip5os1
Gm11266	2.41524e-26	0.412558	0.263	0.15	4.91598e-22	Adipocyte	Gm11266
Faf2	3.1495e-26	0.393373	0.334	0.21	6.41049e-22	Adipocyte	Faf2
Egln1	4.21722e-26	0.424464	0.271	0.157	8.58373e-22	Adipocyte	Egln1
Numa1	4.27538e-26	0.409149	0.476	0.351	8.70211e-22	Adipocyte	Numa1
Ubr3	6.24139e-26	0.349859	0.672	0.593	1.27037e-21	Adipocyte	Ubr3
Rps6ka5	7.15511e-26	0.351018	0.47	0.336	1.45635e-21	Adipocyte	Rps6ka5
Chd9	7.49563e-26	0.286426	0.828	0.746	1.52566e-21	Adipocyte	Chd9
Ndufs4	1.07683e-25	0.384255	0.478	0.353	2.19179e-21	Adipocyte	Ndufs4
Yap1	1.15029e-25	0.365908	0.38	0.25	2.3413e-21	Adipocyte	Yap1
Baz2a	1.53438e-25	0.419944	0.46	0.335	3.12309e-21	Adipocyte	Baz2a
Nr1d2	1.55268e-25	0.339093	0.526	0.39	3.16033e-21	Adipocyte	Nr1d2
Pnn	1.55716e-25	0.443554	0.393	0.271	3.16944e-21	Adipocyte	Pnn
Piezo1	1.63408e-25	0.412028	0.352	0.231	3.32601e-21	Adipocyte	Piezo1
Trappc9	4.33365e-25	0.296785	0.541	0.417	8.82071e-21	Adipocyte	Trappc9
Bicd2	4.69154e-25	0.471043	0.26	0.151	9.54916e-21	Adipocyte	Bicd2
Hipk3	4.87332e-25	0.481117	0.47	0.359	9.91916e-21	Adipocyte	Hipk3
Ttc19	7.53845e-25	0.334101	0.334	0.212	1.53438e-20	Adipocyte	Ttc19
Ube2b	9.47595e-25	0.396985	0.5	0.382	1.92873e-20	Adipocyte	Ube2b
Uty	1.14605e-24	0.380664	0.652	0.572	2.33268e-20	Adipocyte	Uty
Naa50	1.24247e-24	0.348107	0.278	0.164	2.52891e-20	Adipocyte	Naa50
Atl3	1.24873e-24	0.399227	0.446	0.327	2.54166e-20	Adipocyte	Atl3
Atp2a2	1.45377e-24	0.389077	0.472	0.352	2.95901e-20	Adipocyte	Atp2a2
Map3k5	1.48109e-24	0.332403	0.616	0.502	3.01462e-20	Adipocyte	Map3k5
Rc3h1	1.65147e-24	0.3755	0.568	0.459	3.36141e-20	Adipocyte	Rc3h1
0610010F05Rik	1.69224e-24	0.344176	0.305	0.187	3.44439e-20	Adipocyte	0610010F05Rik
Eprs	1.98087e-24	0.38693	0.306	0.192	4.03186e-20	Adipocyte	Eprs
Lypla1	2.4493e-24	0.368237	0.311	0.192	4.9853e-20	Adipocyte	Lypla1
Kcmf1	2.54168e-24	0.380969	0.565	0.453	5.17333e-20	Adipocyte	Kcmf1
Brwd1	2.66151e-24	0.373123	0.616	0.509	5.41724e-20	Adipocyte	Brwd1
St3gal3	2.8338e-24	0.392786	0.415	0.29	5.76791e-20	Adipocyte	St3gal3
Sgpl1	2.90236e-24	0.395716	0.338	0.221	5.90747e-20	Adipocyte	Sgpl1
Srr	3.26545e-24	0.352154	0.264	0.153	6.64651e-20	Adipocyte	Srr
Pxdn	4.64714e-24	0.419158	0.283	0.172	9.4588e-20	Adipocyte	Pxdn
Txnip	5.28768e-24	0.389036	0.52	0.398	1.07626e-19	Adipocyte	Txnip
Safb	5.46475e-24	0.394353	0.46	0.337	1.1123e-19	Adipocyte	Safb
Rarb	5.69015e-24	0.390074	0.272	0.161	1.15817e-19	Adipocyte	Rarb
Zbtb38	6.05021e-24	0.369	0.351	0.234	1.23146e-19	Adipocyte	Zbtb38
Siah1a	7.49552e-24	0.344828	0.31	0.191	1.52564e-19	Adipocyte	Siah1a
Ube2k	1.1274e-23	0.344245	0.668	0.584	2.29471e-19	Adipocyte	Ube2k
Pptc7	2.51968e-23	0.403578	0.274	0.167	5.12855e-19	Adipocyte	Pptc7
Tsc22d3	2.7728e-23	0.498982	0.335	0.226	5.64376e-19	Adipocyte	Tsc22d3
Ube4a	3.29891e-23	0.387105	0.355	0.24	6.7146e-19	Adipocyte	Ube4a
Cavin1	3.81559e-23	0.270631	0.258	0.147	7.76625e-19	Adipocyte	Cavin1
Ubqln1	3.95921e-23	0.317427	0.27	0.159	8.05857e-19	Adipocyte	Ubqln1
Amotl2	5.66882e-23	0.387057	0.275	0.169	1.15383e-18	Adipocyte	Amotl2
Zfp91	8.40085e-23	0.317277	0.389	0.267	1.70991e-18	Adipocyte	Zfp91
Fbxo3	1.16105e-22	0.342463	0.341	0.225	2.36319e-18	Adipocyte	Fbxo3
Nktr	1.17121e-22	0.319841	0.671	0.577	2.38389e-18	Adipocyte	Nktr
Slc25a17	1.29204e-22	0.386336	0.271	0.166	2.62983e-18	Adipocyte	Slc25a17
G3bp2	2.16825e-22	0.327403	0.313	0.198	4.41327e-18	Adipocyte	G3bp2
Pcbd2	2.32353e-22	0.401313	0.289	0.181	4.7293e-18	Adipocyte	Pcbd2
Herc3	2.66915e-22	0.388688	0.253	0.151	5.4328e-18	Adipocyte	Herc3
Rars2	3.64967e-22	0.3303	0.276	0.17	7.42855e-18	Adipocyte	Rars2
Zbtb11	4.28214e-22	0.398939	0.332	0.222	8.71587e-18	Adipocyte	Zbtb11
Map2k5	5.77523e-22	0.335996	0.555	0.452	1.17549e-17	Adipocyte	Map2k5
Snx14	6.06216e-22	0.309225	0.314	0.2	1.23389e-17	Adipocyte	Snx14
Lncppara	6.84368e-22	0.342405	0.508	0.39	1.39296e-17	Adipocyte	Lncppara
Hnrnpc	8.1791e-22	0.343822	0.549	0.45	1.66477e-17	Adipocyte	Hnrnpc
Ptcd3	8.96856e-22	0.410217	0.311	0.206	1.82546e-17	Adipocyte	Ptcd3
Kansl3	9.19592e-22	0.367775	0.338	0.225	1.87174e-17	Adipocyte	Kansl3
Atg2b	1.14036e-21	0.341514	0.257	0.155	2.3211e-17	Adipocyte	Atg2b
Scaf4	1.24357e-21	0.355502	0.469	0.353	2.53117e-17	Adipocyte	Scaf4
Amn1	1.55351e-21	0.426469	0.332	0.225	3.16202e-17	Adipocyte	Amn1
Akap8l	1.82963e-21	0.373082	0.498	0.392	3.72403e-17	Adipocyte	Akap8l
Supt3	2.06464e-21	0.269765	0.502	0.379	4.20238e-17	Adipocyte	Supt3
Ubap1	2.45971e-21	0.315655	0.325	0.212	5.00649e-17	Adipocyte	Ubap1
Rnf214	2.89613e-21	0.339869	0.316	0.207	5.89479e-17	Adipocyte	Rnf214
Ptms	3.18469e-21	0.375849	0.25	0.151	6.48212e-17	Adipocyte	Ptms
Eif3j1	4.10975e-21	0.312387	0.26	0.157	8.36499e-17	Adipocyte	Eif3j1
Dpm1	5.37345e-21	0.320362	0.265	0.162	1.09371e-16	Adipocyte	Dpm1
Zmat1	5.38371e-21	0.351303	0.253	0.152	1.0958e-16	Adipocyte	Zmat1
Rhot1	6.31943e-21	0.357323	0.403	0.293	1.28626e-16	Adipocyte	Rhot1
Ano10	1.09492e-20	0.293248	0.269	0.164	2.2286e-16	Adipocyte	Ano10
Fyco1	1.3236e-20	0.282348	0.324	0.213	2.69406e-16	Adipocyte	Fyco1
Vcp	1.47575e-20	0.362627	0.342	0.232	3.00375e-16	Adipocyte	Vcp
2023-03-06	1.65896e-20	0.347789	0.47	0.359	3.37664e-16	Adipocyte	2023-03-06
Nploc4	1.73393e-20	0.349929	0.297	0.192	3.52923e-16	Adipocyte	Nploc4
Zbtb16	2.34878e-20	0.449159	0.763	0.686	4.7807e-16	Adipocyte	Zbtb16
Zscan26	3.10009e-20	0.342064	0.394	0.282	6.30992e-16	Adipocyte	Zscan26
Ankrd28	3.30002e-20	0.312788	0.323	0.213	6.71685e-16	Adipocyte	Ankrd28
2610507B11Rik	4.61604e-20	0.328913	0.359	0.246	9.39549e-16	Adipocyte	2610507B11Rik
Zfand5	4.62104e-20	0.287979	0.359	0.247	9.40567e-16	Adipocyte	Zfand5
Ammecr1l	5.13338e-20	0.304691	0.294	0.189	1.04485e-15	Adipocyte	Ammecr1l
Tfcp2	5.55649e-20	0.325043	0.281	0.177	1.13097e-15	Adipocyte	Tfcp2
Cpeb1	6.10416e-20	0.298944	0.374	0.263	1.24244e-15	Adipocyte	Cpeb1
Upp2	6.15032e-20	0.340721	0.327	0.22	1.25184e-15	Adipocyte	Upp2
Firre	1.27203e-19	0.293524	0.357	0.243	2.58908e-15	Adipocyte	Firre
Zranb1	1.48484e-19	0.346989	0.446	0.341	3.02224e-15	Adipocyte	Zranb1
Psmd1	1.86925e-19	0.301137	0.324	0.216	3.80468e-15	Adipocyte	Psmd1
Slc7a6	2.17419e-19	0.411566	0.273	0.178	4.42535e-15	Adipocyte	Slc7a6
Sec24a	2.20769e-19	0.320145	0.443	0.333	4.49354e-15	Adipocyte	Sec24a
Cul4a	2.45883e-19	0.32046	0.325	0.218	5.0047e-15	Adipocyte	Cul4a
Rab10	2.58279e-19	0.304451	0.606	0.508	5.25701e-15	Adipocyte	Rab10
Txndc11	3.06564e-19	0.316224	0.375	0.266	6.23981e-15	Adipocyte	Txndc11
Hdlbp	3.43573e-19	0.336016	0.426	0.318	6.99309e-15	Adipocyte	Hdlbp
Lrrc8d	4.4973e-19	0.279278	0.478	0.36	9.15381e-15	Adipocyte	Lrrc8d
Tbc1d32	5.99148e-19	0.339891	0.278	0.181	1.21951e-14	Adipocyte	Tbc1d32
Zfp532	7.17333e-19	0.255357	0.374	0.26	1.46006e-14	Adipocyte	Zfp532
Klhl7	1.27005e-18	0.282451	0.313	0.206	2.58507e-14	Adipocyte	Klhl7
Fam193b	1.7463e-18	0.333595	0.448	0.339	3.55443e-14	Adipocyte	Fam193b
Extl3	1.80426e-18	0.291934	0.382	0.272	3.67238e-14	Adipocyte	Extl3
Trpm7	2.10243e-18	0.316043	0.631	0.544	4.27928e-14	Adipocyte	Trpm7
St3gal6	2.28524e-18	0.427494	0.284	0.188	4.65139e-14	Adipocyte	St3gal6
Orc3	4.77857e-18	0.333498	0.34	0.237	9.7263e-14	Adipocyte	Orc3
Mrps9	6.20517e-18	0.305304	0.286	0.19	1.263e-13	Adipocyte	Mrps9
Smarcc2	6.20862e-18	0.337516	0.435	0.332	1.2637e-13	Adipocyte	Smarcc2
Zyg11b	7.00353e-18	0.341126	0.352	0.251	1.4255e-13	Adipocyte	Zyg11b
Ccnl1	1.34595e-17	0.318577	0.553	0.464	2.73954e-13	Adipocyte	Ccnl1
Fam193a	1.51482e-17	0.260991	0.69	0.621	3.08326e-13	Adipocyte	Fam193a
Eif4g2	1.51948e-17	0.347274	0.362	0.26	3.09274e-13	Adipocyte	Eif4g2
Tle3	1.59437e-17	0.35344	0.279	0.188	3.24518e-13	Adipocyte	Tle3
Ubxn4	2.11478e-17	0.312869	0.401	0.298	4.30442e-13	Adipocyte	Ubxn4
Nr3c1	2.82459e-17	0.313794	0.659	0.596	5.74917e-13	Adipocyte	Nr3c1
Trmt1l	2.90802e-17	0.347271	0.37	0.27	5.91899e-13	Adipocyte	Trmt1l
N4bp2l2	3.02557e-17	0.324742	0.496	0.401	6.15825e-13	Adipocyte	N4bp2l2
Mat2a	3.99688e-17	0.330572	0.38	0.281	8.13525e-13	Adipocyte	Mat2a
Ell	4.00415e-17	0.290023	0.264	0.17	8.15004e-13	Adipocyte	Ell
Ube2q2	4.52928e-17	0.294211	0.347	0.247	9.21891e-13	Adipocyte	Ube2q2
Mbtd1	5.68929e-17	0.297728	0.543	0.447	1.158e-12	Adipocyte	Mbtd1
Eif4b	6.02159e-17	0.29445	0.291	0.197	1.22563e-12	Adipocyte	Eif4b
Stim1	7.2308e-17	0.281871	0.587	0.49	1.47176e-12	Adipocyte	Stim1
Megf9	1.22187e-16	0.310104	0.286	0.193	2.48699e-12	Adipocyte	Megf9
Pcnx	1.43558e-16	0.254595	0.435	0.329	2.92197e-12	Adipocyte	Pcnx
Ppp2ca	1.44243e-16	0.300191	0.396	0.294	2.93593e-12	Adipocyte	Ppp2ca
Hnrnph3	1.85241e-16	0.31573	0.378	0.28	3.7704e-12	Adipocyte	Hnrnph3
Rbm25	1.89288e-16	0.262486	0.771	0.696	3.85276e-12	Adipocyte	Rbm25
Phldb11	2.03557e-16	0.274681	0.325	0.225	4.14319e-12	Adipocyte	Phldb1
Larp1	2.301e-16	0.270574	0.423	0.321	4.68345e-12	Adipocyte	Larp1
Metap1d	2.30357e-16	0.338852	0.336	0.24	4.68868e-12	Adipocyte	Metap1d
Clk4	2.44797e-16	0.3	0.436	0.337	4.9826e-12	Adipocyte	Clk4
Rev1	2.62744e-16	0.27795	0.406	0.303	5.3479e-12	Adipocyte	Rev1
4930523C07Rik	3.58971e-16	0.291336	0.277	0.186	7.3065e-12	Adipocyte	4930523C07Rik
Lrig2	3.7753e-16	0.305759	0.356	0.259	7.68424e-12	Adipocyte	Lrig2
Pcmtd1	3.83469e-16	0.296842	0.549	0.461	7.80512e-12	Adipocyte	Pcmtd1
Uhrf1bp1l	4.62478e-16	0.363196	0.364	0.273	9.41328e-12	Adipocyte	Uhrf1bp1l
Bag3	5.04376e-16	0.307409	0.261	0.173	1.02661e-11	Adipocyte	Bag3
Uap1	5.80235e-16	0.325476	0.303	0.212	1.18101e-11	Adipocyte	Uap1
Abhd18	7.79263e-16	0.286371	0.277	0.187	1.58611e-11	Adipocyte	Abhd18
Rbbp6	8.69848e-16	0.329471	0.489	0.397	1.77049e-11	Adipocyte	Rbbp6
U2surp	8.71835e-16	0.343136	0.459	0.369	1.77453e-11	Adipocyte	U2surp
Camta2	2.08096e-15	0.288472	0.27	0.182	4.23559e-11	Adipocyte	Camta2
Zfp654	2.08416e-15	0.298842	0.326	0.235	4.24211e-11	Adipocyte	Zfp654
Nmt2	2.20455e-15	0.250788	0.359	0.261	4.48714e-11	Adipocyte	Nmt2
Nfatc3	3.67058e-15	0.31492	0.428	0.332	7.4711e-11	Adipocyte	Nfatc3
Ube2w	5.9724e-15	0.281855	0.452	0.361	1.21562e-10	Adipocyte	Ube2w
Fbh1	8.45603e-15	0.262173	0.272	0.185	1.72114e-10	Adipocyte	Fbh1
Rabgef1	1.54832e-14	0.268613	0.306	0.214	3.15145e-10	Adipocyte	Rabgef1
Huwe1	2.10157e-14	0.251545	0.681	0.613	4.27753e-10	Adipocyte	Huwe1
Upf3b	3.29576e-14	0.359204	0.292	0.209	6.70818e-10	Adipocyte	Upf3b
Opa1	4.68878e-14	0.28102	0.381	0.289	9.54355e-10	Adipocyte	Opa1
Luc7l3	7.55023e-14	0.342708	0.594	0.511	1.53677e-09	Adipocyte	Luc7l3
Srsf10	8.32965e-14	0.289149	0.368	0.279	1.69542e-09	Adipocyte	Srsf10
Gigyf2	8.99264e-14	0.261341	0.546	0.466	1.83036e-09	Adipocyte	Gigyf2
Cyb5a	9.15645e-14	0.354698	0.371	0.29	1.8637e-09	Adipocyte	Cyb5a
Slc25a46	9.18574e-14	0.282195	0.26	0.18	1.86967e-09	Adipocyte	Slc25a46
Akap9	1.02404e-13	0.304796	0.513	0.423	2.08433e-09	Adipocyte	Akap9
Lpgat1	1.35665e-13	0.405274	0.347	0.268	2.76132e-09	Adipocyte	Lpgat1
Dnm1l	1.4748e-13	0.264762	0.372	0.282	3.00181e-09	Adipocyte	Dnm1l
Hnrnpll	1.63928e-13	0.283699	0.336	0.25	3.33659e-09	Adipocyte	Hnrnpll
Crebrf	1.66881e-13	0.266888	0.473	0.38	3.3967e-09	Adipocyte	Crebrf
Dcaf10	1.75921e-13	0.267417	0.282	0.198	3.58069e-09	Adipocyte	Dcaf10
Agpat3	1.82791e-13	0.325263	0.319	0.236	3.72053e-09	Adipocyte	Agpat3
Fxr2	1.9625e-13	0.269196	0.253	0.172	3.99448e-09	Adipocyte	Fxr2
Plgrkt	2.94144e-13	0.278681	0.299	0.214	5.98701e-09	Adipocyte	Plgrkt
Ptpn2	4.11026e-13	0.256224	0.322	0.237	8.36602e-09	Adipocyte	Ptpn2
Hnrnpl	4.13781e-13	0.285827	0.455	0.372	8.4221e-09	Adipocyte	Hnrnpl
Trip11	4.31433e-13	0.291589	0.499	0.415	8.78139e-09	Adipocyte	Trip11
Auh	5.95639e-13	0.267934	0.28	0.198	1.21236e-08	Adipocyte	Auh
Bach1	6.30255e-13	0.360545	0.26	0.186	1.28282e-08	Adipocyte	Bach1
9930021J03Rik	7.28198e-13	0.260631	0.461	0.374	1.48217e-08	Adipocyte	9930021J03Rik
Elavl1	7.58644e-13	0.25011	0.388	0.299	1.54414e-08	Adipocyte	Elavl1
Stimate	8.28224e-13	0.258187	0.334	0.247	1.68577e-08	Adipocyte	Stimate
B4galt1	8.66396e-13	0.334069	0.552	0.479	1.76346e-08	Adipocyte	B4galt1
Zc3h13	1.05164e-12	0.304769	0.373	0.287	2.1405e-08	Adipocyte	Zc3h13
Dnajc7	1.21144e-12	0.311617	0.491	0.407	2.46577e-08	Adipocyte	Dnajc7
Ranbp2	1.56515e-12	0.287268	0.465	0.382	3.1857e-08	Adipocyte	Ranbp2
Ccar1	3.01303e-12	0.300708	0.486	0.409	6.13273e-08	Adipocyte	Ccar1
Sav1	1.08445e-11	0.261061	0.28	0.206	2.2073e-07	Adipocyte	Sav1
Gnptab	1.69051e-11	0.293744	0.258	0.189	3.44086e-07	Adipocyte	Gnptab
Luc7l	1.8251e-11	0.272958	0.381	0.302	3.71482e-07	Adipocyte	Luc7l
Ergic1	1.92727e-11	0.270515	0.314	0.237	3.92277e-07	Adipocyte	Ergic1
Cdk7	2.27867e-11	0.272505	0.299	0.225	4.638e-07	Adipocyte	Cdk7
Pkn1	2.45433e-11	0.275835	0.356	0.281	4.99554e-07	Adipocyte	Pkn1
Zmym5	4.86219e-11	0.283888	0.418	0.34	9.89649e-07	Adipocyte	Zmym5
Mgrn1	5.47691e-11	0.259897	0.289	0.216	1.11477e-06	Adipocyte	Mgrn1
Kdm5a	1.93513e-10	0.250929	0.462	0.387	3.93876e-06	Adipocyte	Kdm5a
Sos2	2.51763e-10	0.255365	0.471	0.398	5.12438e-06	Adipocyte	Sos2
Rnf217	8.08126e-10	0.25469	0.291	0.223	1.64486e-05	Adipocyte	Rnf217
Ahdc1	1.79476e-09	0.283472	0.331	0.259	3.65306e-05	Adipocyte	Ahdc1
F13a1	0	4.86959	0.58	0.002	0	Macrophage	F13a1
Mctp1	0	4.67962	0.793	0.012	0	Macrophage	Mctp1
Slc9a9	0	4.54252	0.819	0.025	0	Macrophage	Slc9a9
Dock2	0	4.48503	0.962	0.011	0	Macrophage	Dock2
Rbpj	0	4.40367	0.832	0.262	0	Macrophage	Rbpj
Arhgap15	0	4.38384	0.891	0.021	0	Macrophage	Arhgap15
Mrc1	0	4.05643	0.565	0.002	0	Macrophage	Mrc1
Epsti1	0	4.02008	0.693	0.005	0	Macrophage	Epsti1
Ptprj1	0	3.9427	0.914	0.055	0	Macrophage	Ptprj
Slc8a11	0	3.92772	0.815	0.054	0	Macrophage	Slc8a1
Hdac9	0	3.90226	0.753	0.04	0	Macrophage	Hdac9
Pip4k2a	0	3.84842	0.912	0.073	0	Macrophage	Pip4k2a
Runx1	0	3.78459	0.805	0.029	0	Macrophage	Runx1
Ptprc	0	3.78365	0.831	0.009	0	Macrophage	Ptprc
Wdfy4	0	3.45093	0.561	0.005	0	Macrophage	Wdfy4
Prkcb	0	3.4372	0.731	0.014	0	Macrophage	Prkcb
Frmd4b1	0	3.37152	0.708	0.081	0	Macrophage	Frmd4b
Parp81	0	3.3463	0.765	0.04	0	Macrophage	Parp8
Dab2	0	3.31815	0.513	0.031	0	Macrophage	Dab2
Tanc21	0	3.19388	0.634	0.09	0	Macrophage	Tanc2
Dock101	0	3.18332	0.731	0.16	0	Macrophage	Dock10
Fyb	0	3.17781	0.737	0.005	0	Macrophage	Fyb
Dock8	0	3.16858	0.775	0.055	0	Macrophage	Dock8
Elmo11	0	3.15214	0.832	0.07	0	Macrophage	Elmo1
Lyn	0	3.09354	0.81	0.074	0	Macrophage	Lyn
Vav3	0	3.08983	0.71	0.036	0	Macrophage	Vav3
Inpp5d	0	2.98567	0.77	0.012	0	Macrophage	Inpp5d
Cd74	0	2.97496	0.651	0.006	0	Macrophage	Cd74
Bank1	0	2.9742	0.525	0.01	0	Macrophage	Bank1
Lcp1	0	2.97318	0.693	0.008	0	Macrophage	Lcp1
Gm26740	0	2.90117	0.691	0.008	0	Macrophage	Gm26740
Ctsc	0	2.86714	0.611	0.051	0	Macrophage	Ctsc
Plcl21	0	2.86591	0.779	0.102	0	Macrophage	Plcl2
Tbxas1	0	2.82209	0.57	0.012	0	Macrophage	Tbxas1
Iqgap2	0	2.73828	0.66	0.03	0	Macrophage	Iqgap2
Ubash3b	0	2.73714	0.566	0.016	0	Macrophage	Ubash3b
Syk	0	2.72813	0.646	0.006	0	Macrophage	Syk
Ikzf1	0	2.71838	0.648	0.009	0	Macrophage	Ikzf1
Mef2c	0	2.69737	0.592	0.045	0	Macrophage	Mef2c
Nrros	0	2.67615	0.656	0.012	0	Macrophage	Nrros
Plxnc1	0	2.6729	0.491	0.007	0	Macrophage	Plxnc1
Stab1	0	2.63024	0.458	0.007	0	Macrophage	Stab1
Trerf11	0	2.61785	0.627	0.085	0	Macrophage	Trerf1
Rab8b1	0	2.60109	0.734	0.11	0	Macrophage	Rab8b
Wipf11	0	2.58707	0.767	0.07	0	Macrophage	Wipf1
Fli1	0	2.58324	0.765	0.044	0	Macrophage	Fli1
Aoah	0	2.5759	0.434	0.002	0	Macrophage	Aoah
Pik3ap1	0	2.57136	0.594	0.007	0	Macrophage	Pik3ap1
H2-Eb1	0	2.57114	0.516	0.004	0	Macrophage	H2-Eb1
2023-03-01	0	2.56494	0.566	0.007	0	Macrophage	2023-03-01
H2-Aa	0	2.56337	0.528	0.005	0	Macrophage	H2-Aa
Myo1f	0	2.56257	0.603	0.003	0	Macrophage	Myo1f
Phactr21	0	2.49456	0.618	0.101	0	Macrophage	Phactr2
P3h2	0	2.47787	0.435	0.012	0	Macrophage	P3h2
Man1c11	0	2.46979	0.539	0.039	0	Macrophage	Man1c1
Itga4	0	2.46767	0.506	0.006	0	Macrophage	Itga4
Serinc3	0	2.46469	0.703	0.113	0	Macrophage	Serinc3
Adgre1	0	2.45391	0.463	0.002	0	Macrophage	Adgre1
Ppm1h	0	2.4351	0.717	0.111	0	Macrophage	Ppm1h
Apba11	0	2.43176	0.537	0.039	0	Macrophage	Apba1
St8sia4	0	2.40214	0.489	0.013	0	Macrophage	St8sia4
Tbc1d9	0	2.38775	0.461	0.013	0	Macrophage	Tbc1d9
Ciita	0	2.38184	0.459	0.004	0	Macrophage	Ciita
Cd86	0	2.37403	0.485	0.001	0	Macrophage	Cd86
Cers61	0	2.36633	0.637	0.1	0	Macrophage	Cers6
Rftn11	0	2.36581	0.57	0.049	0	Macrophage	Rftn1
Inpp4b	0	2.35406	0.418	0.025	0	Macrophage	Inpp4b
Akt31	0	2.3484	0.615	0.078	0	Macrophage	Akt3
Nav11	0	2.34689	0.819	0.196	0	Macrophage	Nav1
H2-Ab1	0	2.34008	0.492	0.003	0	Macrophage	H2-Ab1
Tsc22d11	0	2.3371	0.689	0.132	0	Macrophage	Tsc22d1
Arhgap45	0	2.32421	0.585	0.006	0	Macrophage	Arhgap45
Gas71	0	2.30883	0.511	0.036	0	Macrophage	Gas7
Ly86	0	2.29149	0.554	0.009	0	Macrophage	Ly86
Cd163	0	2.27597	0.299	0.001	0	Macrophage	Cd163
Nedd9	0	2.24653	0.615	0.09	0	Macrophage	Nedd9
Apobec1	0	2.20631	0.472	0.047	0	Macrophage	Apobec1
Samhd11	0	2.18976	0.625	0.085	0	Macrophage	Samhd1
Apbb1ip1	0	2.18724	0.594	0.039	0	Macrophage	Apbb1ip
Tns3	0	2.17844	0.585	0.035	0	Macrophage	Tns3
Unc93b1	0	2.17492	0.656	0.106	0	Macrophage	Unc93b1
Gsap	0	2.16797	0.509	0.014	0	Macrophage	Gsap
Arhgap181	0	2.16714	0.632	0.093	0	Macrophage	Arhgap18
Entpd1	0	2.16526	0.468	0.02	0	Macrophage	Entpd1
Abca91	0	2.14814	0.459	0.032	0	Macrophage	Abca9
Sirpa	0	2.13316	0.508	0.066	0	Macrophage	Sirpa
Apobec3	0	2.13009	0.518	0.027	0	Macrophage	Apobec3
Gng2	0	2.11135	0.499	0.012	0	Macrophage	Gng2
Lyz2	0	2.10526	0.371	0.001	0	Macrophage	Lyz2
Hpcal1	0	2.0959	0.632	0.092	0	Macrophage	Hpcal1
Cd44	0	2.09164	0.37	0.016	0	Macrophage	Cd44
Pstpip2	0	2.07419	0.389	0.011	0	Macrophage	Pstpip2
Lrrk11	0	2.07119	0.566	0.077	0	Macrophage	Lrrk1
Kcnk13	0	2.06699	0.342	0.003	0	Macrophage	Kcnk13
Kynu	0	2.05676	0.259	0.004	0	Macrophage	Kynu
Adap2	0	2.05025	0.501	0.048	0	Macrophage	Adap2
Prex1	0	2.0393	0.487	0.018	0	Macrophage	Prex1
Eps81	0	2.03129	0.57	0.057	0	Macrophage	Eps8
Pik3cd	0	2.01491	0.494	0.006	0	Macrophage	Pik3cd
Clec10a	0	2.00465	0.332	0.001	0	Macrophage	Clec10a
Mndal1	0	1.98006	0.549	0.047	0	Macrophage	Mndal
Spi1	0	1.97627	0.518	0.002	0	Macrophage	Spi1
Tbc1d1	0	1.97135	0.475	0.028	0	Macrophage	Tbc1d1
Rcsd1	0	1.96553	0.501	0.022	0	Macrophage	Rcsd1
Csf1r	0	1.95109	0.427	0.003	0	Macrophage	Csf1r
Tpd52	0	1.93014	0.525	0.05	0	Macrophage	Tpd52
Nckap1l	0	1.92584	0.518	0.002	0	Macrophage	Nckap1l
Arhgap30	0	1.90289	0.525	0.003	0	Macrophage	Arhgap30
Cbfa2t3	0	1.89487	0.411	0.039	0	Macrophage	Cbfa2t3
Tmsb4x	0	1.89072	0.497	0.018	0	Macrophage	Tmsb4x
Plcg2	0	1.8785	0.461	0.007	0	Macrophage	Plcg2
Stard8	0	1.86655	0.38	0.026	0	Macrophage	Stard8
Cmah	0	1.86391	0.339	0.019	0	Macrophage	Cmah
Rab31	0	1.8584	0.485	0.029	0	Macrophage	Rab31
Tec	0	1.85384	0.444	0.016	0	Macrophage	Tec
Mir142hg	0	1.84182	0.449	0.005	0	Macrophage	Mir142hg
Chn2	0	1.83799	0.32	0.021	0	Macrophage	Chn2
Ctss	0	1.82516	0.463	0.003	0	Macrophage	Ctss
Tm6sf1	0	1.82295	0.428	0.006	0	Macrophage	Tm6sf1
Specc1	0	1.82245	0.349	0.01	0	Macrophage	Specc1
Abcg3	0	1.81838	0.309	0.003	0	Macrophage	Abcg3
Lrrc8c	0	1.81815	0.397	0.033	0	Macrophage	Lrrc8c
Nfatc2	0	1.81617	0.42	0.007	0	Macrophage	Nfatc2
Lilrb4a	0	1.81507	0.37	0.001	0	Macrophage	Lilrb4a
Trim30a	0	1.79503	0.491	0.041	0	Macrophage	Trim30a
Tnfrsf11a	0	1.78106	0.399	0.007	0	Macrophage	Tnfrsf11a
Otulinl	0	1.76881	0.404	0.003	0	Macrophage	Otulinl
Blnk	0	1.7625	0.394	0.006	0	Macrophage	Blnk
Dapp1	0	1.75747	0.444	0.01	0	Macrophage	Dapp1
Aim2	0	1.7474	0.439	0.003	0	Macrophage	Aim2
Prcp	0	1.73353	0.478	0.028	0	Macrophage	Prcp
Adam191	0	1.73185	0.421	0.039	0	Macrophage	Adam19
Prkcd	0	1.72374	0.453	0.019	0	Macrophage	Prkcd
Cd48	0	1.72036	0.459	0.003	0	Macrophage	Cd48
Ehd4	0	1.70933	0.383	0.016	0	Macrophage	Ehd4
Ptafr	0	1.68888	0.344	0.001	0	Macrophage	Ptafr
Nlrp1b	0	1.68112	0.349	0.001	0	Macrophage	Nlrp1b
2610203C22Rik	0	1.68107	0.302	0.012	0	Macrophage	2610203C22Rik
Atp8b4	0	1.68066	0.304	0.003	0	Macrophage	Atp8b4
Ctsh	0	1.67639	0.43	0.011	0	Macrophage	Ctsh
Adam22	0	1.67595	0.333	0.013	0	Macrophage	Adam22
Lcp2	0	1.67383	0.358	0.003	0	Macrophage	Lcp2
Cd84	0	1.67045	0.335	0.003	0	Macrophage	Cd84
Mfhas1	0	1.66446	0.418	0.039	0	Macrophage	Mfhas1
C1qc	0	1.65587	0.292	0	0	Macrophage	C1qc
Cerk	0	1.65131	0.397	0.021	0	Macrophage	Cerk
C1qa	0	1.64963	0.302	0	0	Macrophage	C1qa
Pld4	0	1.64879	0.383	0.001	0	Macrophage	Pld4
Pik3r5	0	1.64698	0.37	0.005	0	Macrophage	Pik3r5
Lrmp	0	1.6451	0.411	0.003	0	Macrophage	Lrmp
Irf8	0	1.61836	0.304	0.006	0	Macrophage	Irf8
Gm35154	0	1.6144	0.276	0.001	0	Macrophage	Gm35154
Gm21188	0	1.61129	0.34	0	0	Macrophage	Gm21188
F630028O10Rik	0	1.61004	0.299	0.001	0	Macrophage	F630028O10Rik
Cd200r1	0	1.6094	0.307	0.001	0	Macrophage	Cd200r1
Slc9a7	0	1.59619	0.283	0.006	0	Macrophage	Slc9a7
B4galt6	0	1.57113	0.34	0.011	0	Macrophage	B4galt6
Il10ra	0	1.56674	0.38	0.001	0	Macrophage	Il10ra
Myof1	0	1.56239	0.389	0.031	0	Macrophage	Myof
Ptpn22	0	1.56074	0.333	0.005	0	Macrophage	Ptpn22
Basp1	0	1.54738	0.276	0.009	0	Macrophage	Basp1
Rp2	0	1.54689	0.406	0.03	0	Macrophage	Rp2
Adcy7	0	1.54412	0.39	0.007	0	Macrophage	Adcy7
Cyth4	0	1.54359	0.394	0.001	0	Macrophage	Cyth4
BC035044	0	1.53049	0.295	0.002	0	Macrophage	BC035044
Lair1	0	1.5236	0.268	0	0	Macrophage	Lair1
Elf4	0	1.52134	0.43	0.029	0	Macrophage	Elf4
Ms4a6b	0	1.51734	0.328	0.001	0	Macrophage	Ms4a6b
Rell1	0	1.51713	0.337	0.016	0	Macrophage	Rell1
Abr	0	1.51579	0.345	0.021	0	Macrophage	Abr
Rassf4	0	1.51554	0.394	0.007	0	Macrophage	Rassf4
Laptm5	0	1.51083	0.38	0.002	0	Macrophage	Laptm5
Tnfrsf1b	0	1.5026	0.335	0.018	0	Macrophage	Tnfrsf1b
Ptpro	0	1.49797	0.342	0.001	0	Macrophage	Ptpro
Ptpre	0	1.49752	0.33	0.022	0	Macrophage	Ptpre
Pou2f2	0	1.47271	0.278	0.007	0	Macrophage	Pou2f2
Arhgap25	0	1.46409	0.34	0.006	0	Macrophage	Arhgap25
P2ry6	0	1.46046	0.313	0.001	0	Macrophage	P2ry6
Rnf180	0	1.44754	0.306	0.005	0	Macrophage	Rnf180
Adgrg6	0	1.4339	0.297	0.009	0	Macrophage	Adgrg6
Fgd2	0	1.40933	0.342	0.002	0	Macrophage	Fgd2
Nfam1	0	1.40772	0.325	0.001	0	Macrophage	Nfam1
Itgam	0	1.39733	0.271	0.001	0	Macrophage	Itgam
Cd180	0	1.39268	0.316	0.004	0	Macrophage	Cd180
Ms4a7	0	1.38316	0.275	0	0	Macrophage	Ms4a7
Rasgrp3	0	1.38045	0.314	0.018	0	Macrophage	Rasgrp3
Pak1	0	1.37566	0.314	0.002	0	Macrophage	Pak1
Fcgr2b	0	1.37448	0.306	0.002	0	Macrophage	Fcgr2b
P2rx7	0	1.36741	0.287	0.007	0	Macrophage	P2rx7
Btk	0	1.34922	0.354	0.002	0	Macrophage	Btk
Prkch	0	1.34815	0.439	0.04	0	Macrophage	Prkch
Ncf2	0	1.3365	0.311	0.002	0	Macrophage	Ncf2
C1qb	0	1.32428	0.264	0.001	0	Macrophage	C1qb
Fermt3	0	1.3231	0.32	0.006	0	Macrophage	Fermt3
Rasa4	0	1.31757	0.332	0.014	0	Macrophage	Rasa4
Cybb	0	1.30599	0.261	0.001	0	Macrophage	Cybb
Hpgds	0	1.29225	0.252	0.003	0	Macrophage	Hpgds
Plek	0	1.2867	0.278	0.008	0	Macrophage	Plek
Pik3r6	0	1.25418	0.304	0.006	0	Macrophage	Pik3r6
Selplg	0	1.24066	0.283	0.002	0	Macrophage	Selplg
A630001G21Rik	0	1.2392	0.337	0.022	0	Macrophage	A630001G21Rik
Hck	0	1.23879	0.278	0.002	0	Macrophage	Hck
Cd53	0	1.23517	0.309	0.004	0	Macrophage	Cd53
Vav1	0	1.22722	0.318	0.005	0	Macrophage	Vav1
Sdc3	0	1.22534	0.287	0.01	0	Macrophage	Sdc3
Naip2	0	1.18667	0.287	0.004	0	Macrophage	Naip2
Ms4a6c	0	1.1128	0.25	0.001	0	Macrophage	Ms4a6c
Arrb2	0	1.09289	0.257	0.01	0	Macrophage	Arrb2
Pirb	0	1.09168	0.268	0	0	Macrophage	Pirb
Cotl1	0	1.0658	0.259	0.009	0	Macrophage	Cotl1
Cmtm7	0	1.05789	0.268	0.01	0	Macrophage	Cmtm7
Irf5	0	1.052	0.257	0.003	0	Macrophage	Irf5
Rgs10	0	1.03691	0.256	0.002	0	Macrophage	Rgs10
Ncf1	0	1.02256	0.273	0.001	0	Macrophage	Ncf1
Tgfb1	6.80209e-306	0.996722	0.254	0.012	1.3845e-301	Macrophage	Tgfb1
Evl	7.8369e-305	1.14112	0.282	0.016	1.59512e-300	Macrophage	Evl
Rassf21	7.80594e-301	1.73646	0.485	0.061	1.58882e-296	Macrophage	Rassf2
Shtn1	6.29825e-297	1.92333	0.577	0.094	1.28195e-292	Macrophage	Shtn1
Dclre1c	4.47507e-294	2.19344	0.544	0.086	9.10855e-290	Macrophage	Dclre1c
Tgfbi	6.80635e-293	1.19729	0.266	0.014	1.38536e-288	Macrophage	Tgfbi
Rtn1	4.49855e-291	1.70655	0.32	0.024	9.15634e-287	Macrophage	Rtn1
Ifi2031	6.42494e-288	1.44195	0.364	0.033	1.30773e-283	Macrophage	Ifi203
Reps21	5.45914e-287	1.93522	0.368	0.034	1.11115e-282	Macrophage	Reps2
Pde4b	6.10924e-286	1.1491	0.309	0.022	1.24347e-281	Macrophage	Pde4b
Ifi2071	1.86097e-284	1.58762	0.383	0.037	3.78782e-280	Macrophage	Ifi207
Gab3	3.34253e-278	1.66014	0.377	0.038	6.80339e-274	Macrophage	Gab3
Stard91	3.22047e-277	1.49592	0.416	0.046	6.55494e-273	Macrophage	Stard9
Elk3	2.30448e-272	1.17989	0.344	0.03	4.69054e-268	Macrophage	Elk3
Taok31	1.69834e-271	1.97688	0.694	0.159	3.45679e-267	Macrophage	Taok3
Swap70	7.80016e-270	1.71739	0.468	0.063	1.58764e-265	Macrophage	Swap70
Nrg2	1.43037e-269	1.64366	0.302	0.023	2.91137e-265	Macrophage	Nrg2
Ccnd31	4.2844e-267	2.20511	0.573	0.1	8.72048e-263	Macrophage	Ccnd3
Far11	2.99356e-264	1.69778	0.534	0.091	6.09309e-260	Macrophage	Far1
Fmn1	1.59107e-263	1.29643	0.304	0.024	3.23847e-259	Macrophage	Fmn1
St6gal1	1.5185e-254	1.92406	0.572	0.106	3.09075e-250	Macrophage	St6gal1
Trim30d	2.17869e-254	1.14217	0.282	0.021	4.43451e-250	Macrophage	Trim30d
Arhgap22	6.17277e-254	1.77563	0.328	0.031	1.25641e-249	Macrophage	Arhgap22
Man1a1	3.98839e-249	2.21288	0.634	0.138	8.11796e-245	Macrophage	Man1a
Atp2b11	4.76362e-248	2.32059	0.82	0.288	9.69588e-244	Macrophage	Atp2b1
Fchsd21	3.20892e-246	2.37213	0.734	0.218	6.53144e-242	Macrophage	Fchsd2
Dse1	1.2344e-245	2.05416	0.553	0.107	2.51249e-241	Macrophage	Dse
App1	1.27362e-242	2.25757	0.736	0.2	2.59233e-238	Macrophage	App
Vrk2	3.81455e-242	2.26115	0.686	0.184	7.76413e-238	Macrophage	Vrk2
Sp1001	8.07171e-240	1.45777	0.468	0.069	1.64292e-235	Macrophage	Sp100
Lgmn	1.32307e-238	1.65479	0.373	0.044	2.69297e-234	Macrophage	Lgmn
Rassf3	9.06417e-238	1.38039	0.342	0.037	1.84492e-233	Macrophage	Rassf3
Myo5a	2.71426e-236	2.36087	0.775	0.265	5.5246e-232	Macrophage	Myo5a
Stk10	1.02225e-232	1.29428	0.326	0.033	2.08069e-228	Macrophage	Stk10
Srgap21	1.28218e-232	2.19891	0.782	0.261	2.60974e-228	Macrophage	Srgap2
Ly6e	2.03946e-229	1.00774	0.271	0.022	4.15112e-225	Macrophage	Ly6e
Zswim6	9.91792e-229	2.52039	0.793	0.283	2.01869e-224	Macrophage	Zswim6
Kctd12	1.40976e-227	1.10291	0.263	0.021	2.86942e-223	Macrophage	Kctd12
Csf2ra	3.21841e-224	1.06081	0.259	0.02	6.55075e-220	Macrophage	Csf2ra
Cmip1	1.4754e-223	1.84747	0.827	0.278	3.00302e-219	Macrophage	Cmip
Skap2	6.48923e-223	2.02482	0.87	0.405	1.32082e-218	Macrophage	Skap2
Fam49b	5.42304e-220	2.15593	0.836	0.356	1.10381e-215	Macrophage	Fam49b
Cfh1	7.76216e-217	2.43362	0.468	0.083	1.57991e-212	Macrophage	Cfh
Arhgef31	2.71837e-216	2.22369	0.649	0.169	5.53298e-212	Macrophage	Arhgef3
Crlf31	3.58601e-216	1.64718	0.603	0.142	7.29896e-212	Macrophage	Crlf3
Notch2	4.88169e-214	1.86055	0.774	0.269	9.93619e-210	Macrophage	Notch2
Alcam	1.00546e-211	2.70733	0.432	0.071	2.04652e-207	Macrophage	Alcam
Disc1	1.03235e-209	1.00237	0.263	0.023	2.10125e-205	Macrophage	Disc1
Lsp11	6.01873e-209	1.18051	0.252	0.021	1.22505e-204	Macrophage	Lsp1
Tbc1d8	2.74663e-208	2.20451	0.44	0.076	5.5905e-204	Macrophage	Tbc1d8
Selenop	5.02701e-208	1.96826	0.444	0.079	1.0232e-203	Macrophage	Selenop
Birc3	2.52166e-207	1.72147	0.494	0.097	5.13258e-203	Macrophage	Birc3
Lrch11	5.76834e-207	1.94201	0.715	0.228	1.17409e-202	Macrophage	Lrch1
Camk1d1	1.14138e-204	1.91203	0.981	0.663	2.32317e-200	Macrophage	Camk1d
Dip2b1	1.41948e-202	1.86335	0.76	0.268	2.8892e-198	Macrophage	Dip2b
B4galt5	1.44767e-202	1.29054	0.351	0.046	2.94658e-198	Macrophage	B4galt5
Slc41a2	3.53125e-202	1.10796	0.263	0.024	7.18751e-198	Macrophage	Slc41a2
Stk17b	1.03612e-201	1.38048	0.349	0.046	2.10892e-197	Macrophage	Stk17b
Timp21	6.14146e-201	1.23441	0.318	0.036	1.25003e-196	Macrophage	Timp2
Mpp6	4.9639e-199	1.44846	0.409	0.064	1.01035e-194	Macrophage	Mpp6
Dock111	5.97595e-199	1.64954	0.646	0.171	1.21634e-194	Macrophage	Dock11
Plekhg5	1.11344e-195	2.44355	0.47	0.097	2.2663e-191	Macrophage	Plekhg5
Dgkz	6.10836e-194	1.1105	0.304	0.035	1.2433e-189	Macrophage	Dgkz
Slc7a7	3.76755e-192	1.2724	0.28	0.029	7.66847e-188	Macrophage	Slc7a7
Ankrd441	3.89344e-192	1.85461	0.826	0.363	7.9247e-188	Macrophage	Ankrd44
Pid11	4.78676e-191	2.8362	0.845	0.463	9.74297e-187	Macrophage	Pid1
Ripor2	2.99399e-189	1.48004	0.33	0.043	6.09397e-185	Macrophage	Ripor2
Cdc42se2	4.53404e-189	1.52989	0.556	0.134	9.22858e-185	Macrophage	Cdc42se2
Lacc1	1.16021e-187	1.00161	0.256	0.025	2.36149e-183	Macrophage	Lacc1
Iqgap11	1.26492e-187	1.71447	0.667	0.206	2.57463e-183	Macrophage	Iqgap1
Arhgap31	2.44735e-187	1.82305	0.499	0.103	4.98133e-183	Macrophage	Arhgap31
Zdhhc14	9.76571e-187	2.55501	0.699	0.242	1.98771e-182	Macrophage	Zdhhc14
Marcks	3.82489e-185	1.45387	0.416	0.075	7.78519e-181	Macrophage	Marcks
Acer3	1.3192e-184	1.88553	0.591	0.16	2.6851e-180	Macrophage	Acer3
Il15	2.23162e-183	1.8135	0.508	0.113	4.54224e-179	Macrophage	Il15
H2-D1	1.43543e-182	1.50892	0.518	0.118	2.92168e-178	Macrophage	H2-D1
Filip1l	5.98258e-181	0.943877	0.273	0.029	1.21769e-176	Macrophage	Filip1l
Sh3bp2	6.9104e-180	0.941945	0.25	0.025	1.40654e-175	Macrophage	Sh3bp2
Alpk1	2.89064e-179	1.33684	0.383	0.063	5.88361e-175	Macrophage	Alpk1
Gab21	6.22979e-178	1.89829	0.827	0.353	1.26801e-173	Macrophage	Gab2
Cd471	2.30267e-177	1.71668	0.618	0.186	4.68686e-173	Macrophage	Cd47
Wsb11	2.72144e-176	1.30579	0.44	0.086	5.53922e-172	Macrophage	Wsb1
Fnbp1	4.90781e-175	1.9326	0.864	0.503	9.98936e-171	Macrophage	Fnbp1
Rap1b1	5.78987e-175	1.59934	0.585	0.161	1.17847e-170	Macrophage	Rap1b
Snx8	8.82578e-173	1.53495	0.449	0.093	1.7964e-168	Macrophage	Snx8
Litaf	7.6867e-172	1.31225	0.347	0.053	1.56455e-167	Macrophage	Litaf
Arhgap171	7.78188e-172	1.75723	0.68	0.242	1.58392e-167	Macrophage	Arhgap17
Itpkb	1.65732e-171	1.31736	0.487	0.104	3.37331e-167	Macrophage	Itpkb
Snx5	7.30726e-171	1.55493	0.501	0.118	1.48732e-166	Macrophage	Snx5
Ifngr2	6.73726e-170	1.02614	0.285	0.036	1.3713e-165	Macrophage	Ifngr2
Psd31	1.07666e-165	3.11898	0.66	0.253	2.19143e-161	Macrophage	Psd3
Mgat4a	3.18507e-159	1.19884	0.288	0.039	6.4829e-155	Macrophage	Mgat4a
Kitl	9.14386e-159	1.25977	0.295	0.04	1.86114e-154	Macrophage	Kitl
Hps3	3.41893e-157	1.39261	0.461	0.107	6.95889e-153	Macrophage	Hps3
Uvrag1	1.04721e-156	1.92538	0.788	0.392	2.13149e-152	Macrophage	Uvrag
Pltp	2.09979e-155	1.64407	0.335	0.057	4.27391e-151	Macrophage	Pltp
Arhgef6	2.85434e-155	1.40614	0.475	0.115	5.80972e-151	Macrophage	Arhgef6
Pbx3	1.06243e-154	1.73112	0.513	0.133	2.16248e-150	Macrophage	Pbx3
Rtn41	4.77742e-154	1.69889	0.765	0.355	9.72396e-150	Macrophage	Rtn4
Galnt10	4.71986e-151	1.28565	0.373	0.069	9.60681e-147	Macrophage	Galnt10
Actb	5.71539e-150	1.63356	0.554	0.166	1.16331e-145	Macrophage	Actb
Retreg1	4.58649e-149	1.05079	0.28	0.038	9.33534e-145	Macrophage	Retreg1
Maf1	3.12437e-146	2.33143	0.551	0.177	6.35935e-142	Macrophage	Maf
Apoe	2.13952e-143	2.41831	0.475	0.129	4.35477e-139	Macrophage	Apoe
Synj1	3.59278e-143	1.49094	0.632	0.231	7.31274e-139	Macrophage	Synj1
Ncoa31	6.93518e-143	1.47818	0.637	0.226	1.41159e-138	Macrophage	Ncoa3
Aff31	2.76862e-142	2.11833	0.446	0.109	5.63524e-138	Macrophage	Aff3
Grb2	1.14559e-140	1.45508	0.689	0.277	2.33174e-136	Macrophage	Grb2
Rnf130	2.81027e-140	1.48631	0.541	0.163	5.72003e-136	Macrophage	Rnf130
Eml6	3.06366e-140	1.47242	0.361	0.071	6.23577e-136	Macrophage	Eml6
Arhgef2	8.21459e-139	1.2601	0.43	0.103	1.672e-134	Macrophage	Arhgef2
Frmd4a1	1.94651e-138	1.42235	0.304	0.049	3.96192e-134	Macrophage	Frmd4a
Rab43	3.90476e-137	1.55703	0.418	0.097	7.94776e-133	Macrophage	Rab43
Plekha21	2.46897e-136	1.03735	0.332	0.061	5.02534e-132	Macrophage	Plekha2
[truncated: 2,788 more rows]

## Sheet: mPRAT-Adipocytes
	p_val	avg_log2FC	pct.1	pct.2	p_val_adj	cluster	gene
Ucp1	0	2.13832	0.48	0.075	0	mPRAT-ad1	Ucp1
Gk	0	1.93979	0.599	0.246	0	mPRAT-ad1	Gk
Slc4a4	0	1.92464	0.908	0.634	0	mPRAT-ad1	Slc4a4
Pdk4	0	1.63911	0.655	0.292	0	mPRAT-ad1	Pdk4
Pank1	0	1.60847	0.812	0.359	0	mPRAT-ad1	Pank1
Ppara	0	1.59257	0.987	0.77	0	mPRAT-ad1	Ppara
Esrrg	0	1.55834	0.927	0.536	0	mPRAT-ad1	Esrrg
2023-09-09	0	1.55814	0.504	0.14	0	mPRAT-ad1	2023-09-09
Rnf152	0	1.52262	0.654	0.273	0	mPRAT-ad1	Rnf152
Cpt1b	0	1.51015	0.656	0.241	0	mPRAT-ad1	Cpt1b
Pitpnc1	0	1.44336	0.561	0.194	0	mPRAT-ad1	Pitpnc1
Nav2	0	1.42358	0.678	0.305	0	mPRAT-ad1	Nav2
Ppargc1b	0	1.41615	0.97	0.782	0	mPRAT-ad1	Ppargc1b
Adra1a	0	1.28764	0.785	0.49	0	mPRAT-ad1	Adra1a
Itpr2	0	1.22647	0.907	0.651	0	mPRAT-ad1	Itpr2
Cidea	0	1.22055	0.814	0.478	0	mPRAT-ad1	Cidea
Prkag2	0	1.13091	0.924	0.794	0	mPRAT-ad1	Prkag2
Aco2	0	1.00708	0.856	0.678	0	mPRAT-ad1	Aco2
Slc25a42	2.64699e-276	1.43931	0.574	0.274	5.26699e-272	mPRAT-ad1	Slc25a42
A530065N20Rik	1.72333e-269	1.172	0.492	0.153	3.42908e-265	mPRAT-ad1	A530065N20Rik
Akap1	1.87284e-268	1.07348	0.784	0.61	3.72658e-264	mPRAT-ad1	Akap1
Ntrk3	2.00962e-245	0.804098	0.92	0.732	3.99874e-241	mPRAT-ad1	Ntrk3
Tspan18	7.69667e-242	0.79976	0.931	0.816	1.53148e-237	mPRAT-ad1	Tspan18
Gnas	5.04356e-240	1.53314	0.719	0.566	1.00357e-235	mPRAT-ad1	Gnas
Slc27a2	9.29345e-225	1.12023	0.344	0.09	1.84921e-220	mPRAT-ad1	Slc27a2
Coq8a	2.12243e-222	1.04797	0.525	0.218	4.22321e-218	mPRAT-ad1	Coq8a
Nrp2	2.57149e-215	1.16562	0.517	0.234	5.11675e-211	mPRAT-ad1	Nrp2
Ogdh	3.54203e-214	1.00566	0.722	0.57	7.04794e-210	mPRAT-ad1	Ogdh
Gpd1	2.00438e-209	0.916564	0.779	0.633	3.98831e-205	mPRAT-ad1	Gpd1
Aspg	8.00016e-207	1.0241	0.531	0.232	1.59187e-202	mPRAT-ad1	Aspg
Sucla2	2.40331e-206	1.0798	0.642	0.425	4.78211e-202	mPRAT-ad1	Sucla2
Xrcc6	1.00383e-197	1.119	0.56	0.307	1.99742e-193	mPRAT-ad1	Xrcc6
Itpk1	7.05048e-195	1.17523	0.624	0.393	1.4029e-190	mPRAT-ad1	Itpk1
Vwa8	3.3691e-193	0.804534	0.821	0.769	6.70383e-189	mPRAT-ad1	Vwa8
Kcnk3	6.69229e-184	0.943946	0.738	0.548	1.33163e-179	mPRAT-ad1	Kcnk3
Acot11	1.51299e-183	1.06557	0.387	0.138	3.01054e-179	mPRAT-ad1	Acot11
Grk3	6.86582e-183	0.874259	0.705	0.484	1.36616e-178	mPRAT-ad1	Grk3
Pde3a	4.52799e-174	1.11444	0.255	0.057	9.00979e-170	mPRAT-ad1	Pde3a
Prdm16	7.16776e-174	0.807036	0.856	0.722	1.42624e-169	mPRAT-ad1	Prdm16
Gpd2	5.97003e-173	1.05583	0.633	0.451	1.18792e-168	mPRAT-ad1	Gpd2
Gm26917	3.89314e-165	0.596258	0.994	0.981	7.74657e-161	mPRAT-ad1	Gm26917
Gtf2ird1	2.77457e-163	0.973673	0.645	0.473	5.52084e-159	mPRAT-ad1	Gtf2ird1
Elovl6	5.6268e-163	1.04425	0.629	0.388	1.11962e-158	mPRAT-ad1	Elovl6
Ppargc1a	1.39318e-161	1.42847	0.597	0.411	2.77215e-157	mPRAT-ad1	Ppargc1a
Pakap.1	6.56452e-160	0.785904	0.796	0.68	1.30621e-155	mPRAT-ad1	Pakap.1
Hadhb	9.95093e-157	0.971823	0.631	0.47	1.98004e-152	mPRAT-ad1	Hadhb
Macf1	8.96271e-149	0.799106	0.816	0.762	1.7834e-144	mPRAT-ad1	Macf1
Adam12	3.68345e-148	0.919081	0.747	0.603	7.32934e-144	mPRAT-ad1	Adam12
Acadm	5.24884e-145	0.777442	0.729	0.581	1.04441e-140	mPRAT-ad1	Acadm
Atxn2	2.48191e-143	0.714309	0.756	0.694	4.93851e-139	mPRAT-ad1	Atxn2
Slc25a20	1.00695e-141	0.930696	0.573	0.383	2.00363e-137	mPRAT-ad1	Slc25a20
Zfp827	5.24953e-138	0.874079	0.286	0.093	1.04455e-133	mPRAT-ad1	Zfp827
Itpr1	6.48493e-137	0.618942	0.815	0.744	1.29037e-132	mPRAT-ad1	Itpr1
Nol4l	1.04544e-135	0.985512	0.337	0.134	2.08022e-131	mPRAT-ad1	Nol4l
Pald1	2.88835e-133	0.901492	0.507	0.287	5.74724e-129	mPRAT-ad1	Pald1
Chchd3	1.34905e-126	0.570057	0.843	0.812	2.68433e-122	mPRAT-ad1	Chchd3
Gm42418	1.39766e-125	0.591728	0.999	0.996	2.78107e-121	mPRAT-ad1	Gm42418
Acss1	1.11742e-123	0.936975	0.333	0.139	2.22345e-119	mPRAT-ad1	Acss1
Atp1a2	3.13047e-116	0.692194	0.856	0.802	6.22901e-112	mPRAT-ad1	Atp1a2
Rgs7	4.79794e-116	0.561222	0.895	0.811	9.54695e-112	mPRAT-ad1	Rgs7
Nedd4l	2.96992e-112	0.703641	0.786	0.735	5.90955e-108	mPRAT-ad1	Nedd4l
Slc36a2	3.93123e-111	0.584917	0.772	0.714	7.82237e-107	mPRAT-ad1	Slc36a2
Pakap	9.39866e-110	0.741675	0.71	0.596	1.87015e-105	mPRAT-ad1	Pakap
Hadha	7.07936e-107	0.80609	0.587	0.463	1.40865e-102	mPRAT-ad1	Hadha
Col27a1	7.59796e-107	0.819626	0.317	0.139	1.51184e-102	mPRAT-ad1	Col27a1
Slc24a3	3.89161e-105	0.51002	0.889	0.846	7.74352e-101	mPRAT-ad1	Slc24a3
Slc25a51	5.43208e-105	0.731736	0.643	0.513	1.08088e-100	mPRAT-ad1	Slc25a51
Khdrbs3	1.18571e-103	0.898647	0.365	0.186	2.35933e-99	mPRAT-ad1	Khdrbs3
Ahcyl1	2.41294e-103	0.77095	0.594	0.46	4.80126e-99	mPRAT-ad1	Ahcyl1
Ank2	6.22181e-95	0.728082	0.589	0.415	1.23802e-90	mPRAT-ad1	Ank2
Gm19951	1.50368e-92	0.706751	0.649	0.479	2.99201e-88	mPRAT-ad1	Gm19951
Acacb	1.36352e-91	0.34674	0.979	0.944	2.71312e-87	mPRAT-ad1	Acacb
Abcd3	4.88002e-90	0.711718	0.639	0.568	9.71027e-86	mPRAT-ad1	Abcd3
Arhgap26	9.90928e-87	0.56437	0.756	0.701	1.97175e-82	mPRAT-ad1	Arhgap26
Ebf2	2.50776e-86	0.610915	0.826	0.749	4.98993e-82	mPRAT-ad1	Ebf2
Acaa2	6.40397e-86	0.763902	0.391	0.224	1.27426e-81	mPRAT-ad1	Acaa2
Cmss1	7.79636e-84	0.629706	0.897	0.816	1.55132e-79	mPRAT-ad1	Cmss1
Pde4d	7.52416e-82	0.436848	0.912	0.887	1.49716e-77	mPRAT-ad1	Pde4d
Pdgfd	6.31865e-79	0.749508	0.432	0.265	1.25729e-74	mPRAT-ad1	Pdgfd
Pkm	6.39052e-79	0.686443	0.361	0.206	1.27159e-74	mPRAT-ad1	Pkm
Tfrc	7.72415e-75	0.907554	0.439	0.289	1.53695e-70	mPRAT-ad1	Tfrc
Ahdc1	1.06017e-72	0.798001	0.42	0.28	2.10953e-68	mPRAT-ad1	Ahdc1
Prex2	8.60226e-72	0.55693	0.639	0.525	1.71168e-67	mPRAT-ad1	Prex2
Adcy9	1.03276e-69	0.594459	0.696	0.596	2.055e-65	mPRAT-ad1	Adcy9
Lars2	1.98921e-69	0.590719	0.769	0.671	3.95813e-65	mPRAT-ad1	Lars2
Msi2	2.27014e-69	0.467798	0.8	0.774	4.51712e-65	mPRAT-ad1	Msi2
Etfdh	2.60982e-69	0.721859	0.404	0.273	5.19302e-65	mPRAT-ad1	Etfdh
Mbnl2	3.5511e-69	0.456173	0.823	0.824	7.06597e-65	mPRAT-ad1	Mbnl2
Gnao1	6.58375e-69	0.714779	0.409	0.266	1.31003e-64	mPRAT-ad1	Gnao1
Adtrp	3.08782e-68	0.786124	0.394	0.25	6.14415e-64	mPRAT-ad1	Adtrp
Pkn1	1.26157e-66	0.676683	0.441	0.308	2.51028e-62	mPRAT-ad1	Pkn1
Cmtm4	6.67473e-64	0.721999	0.427	0.294	1.32814e-59	mPRAT-ad1	Cmtm4
Cdh2	4.50922e-63	0.711713	0.31	0.171	8.97245e-59	mPRAT-ad1	Cdh2
Immp2l	4.28727e-62	0.308354	0.968	0.958	8.53081e-58	mPRAT-ad1	Immp2l
Cdk8	8.78892e-61	0.525456	0.82	0.775	1.74882e-56	mPRAT-ad1	Cdk8
Adcy3	3.88177e-60	0.722006	0.406	0.275	7.72394e-56	mPRAT-ad1	Adcy3
Suclg1	2.58386e-59	0.66775	0.337	0.209	5.14136e-55	mPRAT-ad1	Suclg1
Mapkapk2	6.41069e-59	0.805227	0.463	0.354	1.2756e-54	mPRAT-ad1	Mapkapk2
Slc22a5	2.14697e-58	0.772716	0.438	0.331	4.27203e-54	mPRAT-ad1	Slc22a5
Txnip	6.1583e-58	0.609121	0.579	0.486	1.22538e-53	mPRAT-ad1	Txnip
Srl	1.82017e-56	0.644787	0.253	0.134	3.62178e-52	mPRAT-ad1	Srl
Mapt	5.32384e-56	0.750806	0.38	0.26	1.05934e-51	mPRAT-ad1	Mapt
Tkt	1.10731e-54	0.531213	0.605	0.511	2.20333e-50	mPRAT-ad1	Tkt
Camk1d	1.14947e-54	0.576782	0.695	0.619	2.28721e-50	mPRAT-ad1	Camk1d
Tmed5	5.00576e-54	0.633219	0.448	0.336	9.96046e-50	mPRAT-ad1	Tmed5
Slc25a19	3.28965e-52	0.562268	0.479	0.367	6.54575e-48	mPRAT-ad1	Slc25a19
Ablim1	4.51923e-52	0.429887	0.805	0.78	8.99236e-48	mPRAT-ad1	Ablim1
Kctd1	8.34808e-52	0.544445	0.25	0.134	1.6611e-47	mPRAT-ad1	Kctd1
Plin2	1.61473e-51	0.656862	0.563	0.509	3.21299e-47	mPRAT-ad1	Plin2
Hk2	3.65593e-51	0.613025	0.633	0.617	7.27457e-47	mPRAT-ad1	Hk2
Tob2	1.43125e-50	0.545126	0.57	0.482	2.84791e-46	mPRAT-ad1	Tob2
Dusp10	2.63302e-50	0.81302	0.437	0.338	5.23918e-46	mPRAT-ad1	Dusp10
Gm35853	1.07791e-49	0.620841	0.426	0.301	2.14483e-45	mPRAT-ad1	Gm35853
Abcc4	2.12286e-49	0.68265	0.349	0.23	4.22407e-45	mPRAT-ad1	Abcc4
Gm17276	2.15758e-49	0.823166	0.287	0.177	4.29316e-45	mPRAT-ad1	Gm17276
P2rx5	6.95165e-49	0.612084	0.281	0.168	1.38324e-44	mPRAT-ad1	P2rx5
Zfp652	2.86466e-48	0.722009	0.343	0.235	5.7001e-44	mPRAT-ad1	Zfp652
Shb	3.18465e-48	0.663726	0.533	0.446	6.33681e-44	mPRAT-ad1	Shb
Sh3kbp1	3.26973e-48	0.448534	0.694	0.657	6.5061e-44	mPRAT-ad1	Sh3kbp1
Idh3a	1.99702e-47	0.625283	0.412	0.311	3.97367e-43	mPRAT-ad1	Idh3a
Esrra	2.02648e-46	0.595623	0.469	0.371	4.0323e-42	mPRAT-ad1	Esrra
Lrpprc	5.87792e-46	0.621733	0.403	0.302	1.16959e-41	mPRAT-ad1	Lrpprc
Nfyc	4.57121e-44	0.552543	0.565	0.514	9.09579e-40	mPRAT-ad1	Nfyc
Cox10	1.53279e-43	0.624101	0.357	0.254	3.04994e-39	mPRAT-ad1	Cox10
Scarf1	7.64118e-43	0.55134	0.352	0.238	1.52044e-38	mPRAT-ad1	Scarf1
Ankrd17	9.25067e-42	0.323554	0.799	0.821	1.8407e-37	mPRAT-ad1	Ankrd17
Acadl	1.17205e-40	0.503704	0.595	0.551	2.33214e-36	mPRAT-ad1	Acadl
Sipa1l1	1.75504e-40	0.412818	0.703	0.67	3.49219e-36	mPRAT-ad1	Sipa1l1
Rere	4.42617e-40	0.256053	0.915	0.926	8.8072e-36	mPRAT-ad1	Rere
Wipi2	1.87769e-39	0.638327	0.396	0.302	3.73623e-35	mPRAT-ad1	Wipi2
Foxn3	2.54096e-39	0.413287	0.775	0.763	5.056e-35	mPRAT-ad1	Foxn3
Sik3	3.11976e-38	0.403872	0.682	0.674	6.2077e-34	mPRAT-ad1	Sik3
Pim1	5.71419e-38	0.488622	0.267	0.164	1.13701e-33	mPRAT-ad1	Pim1
Clstn3	8.07565e-38	0.540508	0.312	0.213	1.60689e-33	mPRAT-ad1	Clstn3
Ddhd1	3.28201e-37	0.526221	0.534	0.463	6.53054e-33	mPRAT-ad1	Ddhd1
Cs	3.69015e-37	0.570322	0.485	0.419	7.34267e-33	mPRAT-ad1	Cs
Txlng	5.8223e-37	0.302693	0.862	0.876	1.15852e-32	mPRAT-ad1	Txlng
Acyp2	7.77133e-37	0.437257	0.732	0.698	1.54634e-32	mPRAT-ad1	Acyp2
Egln1	1.35703e-36	0.620813	0.328	0.239	2.70022e-32	mPRAT-ad1	Egln1
AY036118	3.14824e-36	0.569876	0.31	0.208	6.26437e-32	mPRAT-ad1	AY036118
Gse1	5.76639e-36	0.49847	0.756	0.735	1.1474e-31	mPRAT-ad1	Gse1
Mef2d	8.41473e-36	0.568981	0.506	0.447	1.67436e-31	mPRAT-ad1	Mef2d
Bcl6	8.7013e-36	0.496761	0.56	0.49	1.73138e-31	mPRAT-ad1	Bcl6
Slc25a17	1.08994e-35	0.57825	0.327	0.24	2.16877e-31	mPRAT-ad1	Slc25a17
Neat1	1.74227e-35	0.333318	0.982	0.985	3.46677e-31	mPRAT-ad1	Neat1
Plbd1	5.19058e-35	0.559138	0.3	0.206	1.03282e-30	mPRAT-ad1	Plbd1
Dlst	7.37366e-35	0.578726	0.448	0.38	1.46721e-30	mPRAT-ad1	Dlst
Mlxipl	6.99806e-34	0.294403	0.802	0.803	1.39247e-29	mPRAT-ad1	Mlxipl
Atf2	2.58757e-33	0.50475	0.542	0.509	5.14875e-29	mPRAT-ad1	Atf2
Mtor	2.65617e-33	0.539736	0.463	0.398	5.28524e-29	mPRAT-ad1	Mtor
Gucd1	1.29928e-32	0.484553	0.483	0.401	2.58532e-28	mPRAT-ad1	Gucd1
Zfp710	1.54841e-31	0.562707	0.315	0.225	3.08103e-27	mPRAT-ad1	Zfp710
Ppp1r3b	2.20444e-31	0.498108	0.398	0.306	4.3864e-27	mPRAT-ad1	Ppp1r3b
Cdk17	3.27078e-31	0.569485	0.352	0.271	6.50821e-27	mPRAT-ad1	Cdk17
Eda	3.6187e-31	0.556077	0.441	0.35	7.20049e-27	mPRAT-ad1	Eda
Nr6a1	4.72146e-31	0.499473	0.574	0.547	9.39476e-27	mPRAT-ad1	Nr6a1
Sirt3	5.77559e-31	0.494647	0.273	0.185	1.14923e-26	mPRAT-ad1	Sirt3
Cebpb	1.06162e-30	0.545056	0.349	0.261	2.11241e-26	mPRAT-ad1	Cebpb
Noct	1.13134e-30	0.507542	0.543	0.48	2.25113e-26	mPRAT-ad1	Noct
Psap	1.18041e-30	0.535917	0.467	0.407	2.34877e-26	mPRAT-ad1	Psap
Slc7a6	1.2169e-30	0.50584	0.327	0.241	2.42139e-26	mPRAT-ad1	Slc7a6
Tom1l2	2.31727e-30	0.422985	0.658	0.637	4.6109e-26	mPRAT-ad1	Tom1l2
Cyth1	2.78074e-30	0.326808	0.725	0.71	5.53312e-26	mPRAT-ad1	Cyth1
Foxo1	3.9381e-30	0.438437	0.748	0.745	7.83604e-26	mPRAT-ad1	Foxo1
Agpat3	7.9816e-30	0.563962	0.368	0.291	1.58818e-25	mPRAT-ad1	Agpat3
Atl2	1.02743e-29	0.456899	0.65	0.628	2.04437e-25	mPRAT-ad1	Atl2
Dlat	5.96181e-29	0.443807	0.526	0.47	1.18628e-24	mPRAT-ad1	Dlat
Gnpat	6.29386e-29	0.462247	0.569	0.546	1.25235e-24	mPRAT-ad1	Gnpat
Afg3l2	9.65203e-29	0.499166	0.437	0.37	1.92056e-24	mPRAT-ad1	Afg3l2
Chd4	1.17339e-28	0.421048	0.64	0.629	2.33482e-24	mPRAT-ad1	Chd4
F11r	1.03063e-26	0.453463	0.253	0.171	2.05075e-22	mPRAT-ad1	F11r
Sh3pxd2a	3.59981e-26	0.341571	0.762	0.752	7.16289e-22	mPRAT-ad1	Sh3pxd2a
Add3	1.68917e-25	0.557602	0.412	0.342	3.36112e-21	mPRAT-ad1	Add3
Rsrp1	4.4098e-25	0.273945	0.813	0.835	8.77462e-21	mPRAT-ad1	Rsrp1
Gpi1	9.61505e-25	0.512472	0.365	0.293	1.9132e-20	mPRAT-ad1	Gpi1
Dagla	1.21486e-24	0.546831	0.319	0.245	2.41733e-20	mPRAT-ad1	Dagla
Rarb	1.31985e-24	0.490212	0.322	0.243	2.62623e-20	mPRAT-ad1	Rarb
Stim1	1.40137e-24	0.40963	0.603	0.578	2.78845e-20	mPRAT-ad1	Stim1
Rbpms2	2.24267e-24	0.524077	0.343	0.274	4.46247e-20	mPRAT-ad1	Rbpms2
Fam234a	6.50924e-24	0.503024	0.324	0.25	1.29521e-19	mPRAT-ad1	Fam234a
Etfa	7.04508e-23	0.354217	0.625	0.631	1.40183e-18	mPRAT-ad1	Etfa
Znrf1	7.58752e-23	0.429262	0.55	0.524	1.50977e-18	mPRAT-ad1	Znrf1
Arfgef2	9.71797e-23	0.479966	0.493	0.452	1.93368e-18	mPRAT-ad1	Arfgef2
Vgll4	1.15121e-22	0.36118	0.72	0.732	2.29068e-18	mPRAT-ad1	Vgll4
Ncoa7	1.56445e-22	0.422431	0.293	0.217	3.11294e-18	mPRAT-ad1	Ncoa7
A830018L16Rik	4.47741e-22	0.448273	0.41	0.336	8.90915e-18	mPRAT-ad1	A830018L16Rik
Dnajc11	4.54392e-22	0.485127	0.331	0.263	9.0415e-18	mPRAT-ad1	Dnajc11
Ctcflos	1.12762e-21	0.327835	0.744	0.748	2.24374e-17	mPRAT-ad1	Ctcflos
Ank	1.57353e-21	0.428571	0.511	0.46	3.13102e-17	mPRAT-ad1	Ank
Hectd1	3.35767e-21	0.443037	0.505	0.48	6.68108e-17	mPRAT-ad1	Hectd1
Sod2	3.74733e-21	0.452657	0.382	0.322	7.45643e-17	mPRAT-ad1	Sod2
Flcn	5.24808e-21	0.441587	0.279	0.211	1.04426e-16	mPRAT-ad1	Flcn
Ntrk2	1.32631e-20	0.49329	0.367	0.3	2.63909e-16	mPRAT-ad1	Ntrk2
Cdk6	1.62239e-20	0.372671	0.348	0.271	3.22822e-16	mPRAT-ad1	Cdk6
Epb41	1.7866e-20	0.364625	0.629	0.625	3.55499e-16	mPRAT-ad1	Epb41
Vldlr	5.12722e-20	0.460466	0.296	0.234	1.02021e-15	mPRAT-ad1	Vldlr
Micos10	3.52623e-19	0.460727	0.317	0.259	7.01649e-15	mPRAT-ad1	Micos10
Ube4b	8.92007e-19	0.394732	0.569	0.563	1.77491e-14	mPRAT-ad1	Ube4b
Etv6	1.57793e-18	0.36875	0.586	0.586	3.13977e-14	mPRAT-ad1	Etv6
Mecr	3.53203e-18	0.456521	0.373	0.324	7.02803e-14	mPRAT-ad1	Mecr
Gpat4	4.10281e-18	0.44317	0.537	0.522	8.16376e-14	mPRAT-ad1	Gpat4
Hsdl2	4.26535e-18	0.457877	0.329	0.274	8.48718e-14	mPRAT-ad1	Hsdl2
Dlg1	5.70559e-18	0.413808	0.543	0.556	1.1353e-13	mPRAT-ad1	Dlg1
Atp2a2	6.61926e-18	0.459962	0.48	0.469	1.3171e-13	mPRAT-ad1	Atp2a2
Ucp3	8.07071e-18	0.407704	0.26	0.201	1.60591e-13	mPRAT-ad1	Ucp3
Cgnl1	1.05395e-17	0.274465	0.675	0.668	2.09715e-13	mPRAT-ad1	Cgnl1
Rmdn1	1.25034e-17	0.505271	0.367	0.326	2.48793e-13	mPRAT-ad1	Rmdn1
Rab3ip	3.03419e-17	0.45628	0.261	0.2	6.03744e-13	mPRAT-ad1	Rab3ip
Atp5a1	2.17813e-16	0.456771	0.304	0.25	4.33404e-12	mPRAT-ad1	Atp5a1
Lncbate1	3.29656e-16	0.409621	0.448	0.411	6.5595e-12	mPRAT-ad1	Lncbate1
Ddhd2	5.05458e-16	0.451523	0.496	0.493	1.00576e-11	mPRAT-ad1	Ddhd2
Parm1	8.19084e-16	0.58988	0.303	0.244	1.62981e-11	mPRAT-ad1	Parm1
Eci1	1.07115e-15	0.442211	0.357	0.31	2.13137e-11	mPRAT-ad1	Eci1
Rmnd1	3.67273e-15	0.403293	0.285	0.228	7.30801e-11	mPRAT-ad1	Rmnd1
Dnajc7	4.02045e-15	0.409955	0.504	0.485	7.99989e-11	mPRAT-ad1	Dnajc7
Afg1l	4.7581e-15	0.384423	0.467	0.442	9.46767e-11	mPRAT-ad1	Afg1l
Ergic1	5.33837e-15	0.453652	0.339	0.3	1.06223e-10	mPRAT-ad1	Ergic1
Nampt	9.32916e-15	0.341485	0.618	0.619	1.85632e-10	mPRAT-ad1	Nampt
Kcmf1	1.45295e-14	0.326169	0.566	0.566	2.89107e-10	mPRAT-ad1	Kcmf1
Phlpp1	2.06914e-14	0.38947	0.45	0.412	4.11717e-10	mPRAT-ad1	Phlpp1
Macrod1	2.07942e-14	0.455433	0.409	0.367	4.13762e-10	mPRAT-ad1	Macrod1
Dag1	3.04737e-14	0.390026	0.533	0.53	6.06365e-10	mPRAT-ad1	Dag1
Cnst	5.72263e-14	0.30919	0.542	0.526	1.13869e-09	mPRAT-ad1	Cnst
Nrp1	1.58407e-13	0.303982	0.725	0.759	3.15197e-09	mPRAT-ad1	Nrp1
Apmap	1.86537e-13	0.406738	0.308	0.261	3.71172e-09	mPRAT-ad1	Apmap
Ndufs4	2.45272e-13	0.365742	0.483	0.473	4.88042e-09	mPRAT-ad1	Ndufs4
Fgd4	2.95263e-13	0.359591	0.281	0.228	5.87515e-09	mPRAT-ad1	Fgd4
Sgpl1	3.36913e-13	0.440472	0.36	0.325	6.70389e-09	mPRAT-ad1	Sgpl1
Mpc2	1.12079e-12	0.372681	0.392	0.358	2.23016e-08	mPRAT-ad1	Mpc2
Aldoa	1.33715e-12	0.34499	0.299	0.252	2.66067e-08	mPRAT-ad1	Aldoa
Decr1	1.93858e-12	0.358234	0.401	0.374	3.85739e-08	mPRAT-ad1	Decr1
Chst11	2.08745e-12	0.474425	0.479	0.465	4.15361e-08	mPRAT-ad1	Chst11
Ptprg	3.76831e-12	0.267478	0.684	0.694	7.49819e-08	mPRAT-ad1	Ptprg
Dleu2	4.17091e-12	0.299621	0.673	0.671	8.29929e-08	mPRAT-ad1	Dleu2
Tex2	4.69195e-12	0.421353	0.439	0.423	9.33604e-08	mPRAT-ad1	Tex2
Cluh	5.37706e-12	0.35892	0.517	0.521	1.06993e-07	mPRAT-ad1	Cluh
Cecr2	1.25345e-11	0.361845	0.465	0.437	2.49412e-07	mPRAT-ad1	Cecr2
Mlxip	1.55149e-11	0.373277	0.319	0.275	3.08715e-07	mPRAT-ad1	Mlxip
Itprid2	1.7608e-11	0.354231	0.263	0.218	3.50364e-07	mPRAT-ad1	Itprid2
Pptc7	2.6359e-11	0.400265	0.3	0.26	5.24491e-07	mPRAT-ad1	Pptc7
Dpf3	3.76647e-11	0.363753	0.445	0.417	7.49453e-07	mPRAT-ad1	Dpf3
Mid1	4.41433e-11	0.395686	0.333	0.292	8.78363e-07	mPRAT-ad1	Mid1
Rbpms	5.30799e-11	0.289828	0.648	0.673	1.05618e-06	mPRAT-ad1	Rbpms
Mif4gd	2.0295e-10	0.354567	0.316	0.279	4.0383e-06	mPRAT-ad1	Mif4gd
Raph1	3.59973e-10	0.326283	0.355	0.317	7.16273e-06	mPRAT-ad1	Raph1
Ddo	3.82388e-10	0.293443	0.48	0.454	7.60876e-06	mPRAT-ad1	Ddo
Sbno2	4.77891e-10	0.396945	0.304	0.268	9.50908e-06	mPRAT-ad1	Sbno2
Agl	4.79212e-10	0.354462	0.408	0.38	9.53535e-06	mPRAT-ad1	Agl
R3hdm1	5.1027e-10	0.336098	0.511	0.534	1.01533e-05	mPRAT-ad1	R3hdm1
Angptl4	5.57931e-10	0.404848	0.324	0.295	1.11017e-05	mPRAT-ad1	Angptl4
Stau2	1.00628e-09	0.295564	0.544	0.542	2.0023e-05	mPRAT-ad1	Stau2
Adck1	1.34382e-09	0.368957	0.258	0.218	2.67392e-05	mPRAT-ad1	Adck1
Dennd5a	1.40442e-09	0.370245	0.366	0.343	2.79451e-05	mPRAT-ad1	Dennd5a
Sdhb	1.43118e-09	0.3761	0.266	0.227	2.84776e-05	mPRAT-ad1	Sdhb
Limch1	2.58914e-09	0.289801	0.283	0.237	5.15187e-05	mPRAT-ad1	Limch1
Tomm40	5.60041e-09	0.370109	0.296	0.265	0.000111437	mPRAT-ad1	Tomm40
Snrk	8.23473e-09	0.376415	0.545	0.575	0.000163855	mPRAT-ad1	Snrk
Aifm2	1.02676e-08	0.326022	0.456	0.447	0.000204305	mPRAT-ad1	Aifm2
Rabgef1	1.12663e-08	0.40152	0.325	0.295	0.000224178	mPRAT-ad1	Rabgef1
Mcu	1.36318e-08	0.339725	0.268	0.231	0.000271246	mPRAT-ad1	Mcu
Entpd5	2.40873e-08	0.372845	0.442	0.429	0.000479289	mPRAT-ad1	Entpd5
Etfb	3.93376e-08	0.314597	0.277	0.245	0.000782739	mPRAT-ad1	Etfb
Slc12a7	6.51935e-08	0.425125	0.31	0.284	0.00129722	mPRAT-ad1	Slc12a7
Ehhadh	7.0775e-08	0.603319	0.322	0.307	0.00140828	mPRAT-ad1	Ehhadh
Hsp90ab1	8.97451e-08	0.433018	0.26	0.231	0.00178575	mPRAT-ad1	Hsp90ab1
Ptpn2	1.05975e-07	0.324896	0.337	0.314	0.00210868	mPRAT-ad1	Ptpn2
Fam210a	1.12937e-07	0.274778	0.261	0.226	0.00224722	mPRAT-ad1	Fam210a
Tbc1d20	1.35618e-07	0.305762	0.278	0.249	0.00269852	mPRAT-ad1	Tbc1d20
Resf1	1.36066e-07	0.285873	0.518	0.502	0.00270744	mPRAT-ad1	Resf1
Rgs2	2.71896e-07	0.336372	0.259	0.226	0.00541018	mPRAT-ad1	Rgs2
Fam49a	2.81808e-07	0.383572	0.252	0.222	0.00560742	mPRAT-ad1	Fam49a
Ifi27	4.02339e-07	0.31884	0.297	0.269	0.00800574	mPRAT-ad1	Ifi27
Hivep1	6.31417e-07	0.282192	0.522	0.53	0.0125639	mPRAT-ad1	Hivep1
Ndufv2	6.51117e-07	0.338989	0.331	0.312	0.0129559	mPRAT-ad1	Ndufv2
Sdhc	7.39423e-07	0.279722	0.265	0.234	0.014713	mPRAT-ad1	Sdhc
Ctnnbl1	8.0862e-07	0.317938	0.276	0.249	0.0160899	mPRAT-ad1	Ctnnbl1
Uqcc1	8.15388e-07	0.32325	0.415	0.417	0.0162246	mPRAT-ad1	Uqcc1
Mtch2	9.45083e-07	0.311548	0.403	0.401	0.0188053	mPRAT-ad1	Mtch2
Srsf2	1.0083e-06	0.280951	0.532	0.548	0.0200632	mPRAT-ad1	Srsf2
Bag3	1.20702e-06	0.359873	0.277	0.252	0.0240172	mPRAT-ad1	Bag3
Sec24a	1.5697e-06	0.290581	0.441	0.443	0.0312338	mPRAT-ad1	Sec24a
2610507B11Rik	2.10293e-06	0.350028	0.367	0.354	0.041844	mPRAT-ad1	2610507B11Rik
Sh3bgrl	2.10759e-06	0.322605	0.335	0.315	0.0419369	mPRAT-ad1	Sh3bgrl
Bicd2	2.1439e-06	0.296293	0.278	0.25	0.0426592	mPRAT-ad1	Bicd2
Ntrk31	1.33591e-114	0.579818	0.922	0.749	2.6582e-110	mPRAT-ad2	Ntrk3
Acaca	2.73113e-104	0.65624	0.949	0.903	5.4344e-100	mPRAT-ad2	Acaca
Tmem132b	2.61924e-86	0.790866	0.409	0.222	5.21177e-82	mPRAT-ad2	Tmem132b
Acly	4.55467e-83	0.770597	0.54	0.357	9.06288e-79	mPRAT-ad2	Acly
Acacb1	1.9684e-73	0.399329	0.983	0.945	3.91672e-69	mPRAT-ad2	Acacb
Sorcs2	4.10478e-66	0.684011	0.268	0.125	8.1677e-62	mPRAT-ad2	Sorcs2
Fasn	1.91372e-49	0.548301	0.523	0.387	3.80793e-45	mPRAT-ad2	Fasn
Immp2l1	5.54461e-46	0.274877	0.974	0.956	1.10327e-41	mPRAT-ad2	Immp2l
Cidea1	1.20552e-44	0.263844	0.747	0.539	2.39874e-40	mPRAT-ad2	Cidea
Tspan181	2.64043e-44	0.303795	0.909	0.837	5.25392e-40	mPRAT-ad2	Tspan18
Ppp1r3b1	1.03052e-39	0.409095	0.435	0.299	2.05053e-35	mPRAT-ad2	Ppp1r3b
Tgfbr2	3.33988e-38	0.505168	0.417	0.3	6.64569e-34	mPRAT-ad2	Tgfbr2
Dleu21	2.66056e-36	0.37305	0.728	0.647	5.29399e-32	mPRAT-ad2	Dleu2
Gucd11	4.35209e-34	0.484333	0.509	0.397	8.65979e-30	mPRAT-ad2	Gucd1
Tkt1	1.26623e-33	0.411645	0.617	0.515	2.51955e-29	mPRAT-ad2	Tkt
Ddo1	1.01098e-32	0.388455	0.538	0.432	2.01164e-28	mPRAT-ad2	Ddo
Tmem45b	9.2512e-31	0.312793	0.655	0.527	1.8408e-26	mPRAT-ad2	Tmem45b
Adcy91	1.8351e-29	0.355323	0.683	0.611	3.65149e-25	mPRAT-ad2	Adcy9
Dpyd	1.7475e-28	0.258923	0.873	0.839	3.47717e-24	mPRAT-ad2	Dpyd
Vat1l	1.4254e-27	0.460226	0.268	0.172	2.83625e-23	mPRAT-ad2	Vat1l
Acss2	1.95931e-26	0.50814	0.536	0.441	3.89863e-22	mPRAT-ad2	Acss2
St3gal6	9.79626e-26	0.440756	0.352	0.254	1.94926e-21	mPRAT-ad2	St3gal6
Fam13a	2.82908e-25	0.365144	0.938	0.935	5.62931e-21	mPRAT-ad2	Fam13a
Gm358531	4.45082e-24	0.271882	0.425	0.314	8.85624e-20	mPRAT-ad2	Gm35853
Pim11	2.8624e-23	0.254183	0.266	0.174	5.6956e-19	mPRAT-ad2	Pim1
Svep1	5.96821e-23	0.3739	0.591	0.513	1.18755e-18	mPRAT-ad2	Svep1
Limch11	6.44198e-23	0.362643	0.315	0.228	1.28182e-18	mPRAT-ad2	Limch1
Cnst1	7.32393e-23	0.339924	0.586	0.508	1.45732e-18	mPRAT-ad2	Cnst
Deptor	2.38621e-22	0.272614	0.671	0.593	4.74808e-18	mPRAT-ad2	Deptor
Scd1	3.53277e-22	0.412255	0.548	0.463	7.0295e-18	mPRAT-ad2	Scd1
Ivns1abp	4.79626e-22	0.279084	0.636	0.552	9.54359e-18	mPRAT-ad2	Ivns1abp
Dock9	4.00749e-20	0.256933	0.753	0.68	7.9741e-16	mPRAT-ad2	Dock9
Ank1	1.05183e-19	0.35878	0.528	0.457	2.09293e-15	mPRAT-ad2	Ank
D10Wsu102e	1.50297e-18	0.378978	0.256	0.185	2.99061e-14	mPRAT-ad2	D10Wsu102e
Pde8a	2.68965e-18	0.298362	0.519	0.447	5.35186e-14	mPRAT-ad2	Pde8a
Parm11	1.02471e-17	0.327288	0.321	0.241	2.03897e-13	mPRAT-ad2	Parm1
Inca11	8.09063e-16	0.261391	0.505	0.437	1.60987e-11	mPRAT-ad2	Inca1
Cdk61	1.40056e-15	0.286473	0.354	0.276	2.78684e-11	mPRAT-ad2	Cdk6
Mettl24	1.57828e-15	0.320242	0.337	0.268	3.14046e-11	mPRAT-ad2	Mettl24
Cecr21	7.38926e-15	0.288701	0.492	0.428	1.47032e-10	mPRAT-ad2	Cecr2
Aacs	1.01741e-14	0.328109	0.604	0.55	2.02444e-10	mPRAT-ad2	Aacs
Sugct	1.04325e-14	0.279222	0.567	0.499	2.07586e-10	mPRAT-ad2	Sugct
Tob1	1.52973e-13	0.304793	0.506	0.453	3.04385e-09	mPRAT-ad2	Tob1
Tmem131l	1.28047e-11	0.259844	0.358	0.299	2.54789e-07	mPRAT-ad2	Tmem131l
Resf11	6.13098e-11	0.318822	0.533	0.497	1.21994e-06	mPRAT-ad2	Resf1
Picalm	1.44447e-06	0.310879	0.668	0.659	0.028742	mPRAT-ad2	Picalm
Me1	1.65002e-06	0.446112	0.487	0.457	0.0328321	mPRAT-ad2	Me1
Slit3	0	1.89719	0.868	0.381	0	mPRAT-ad3	Slit3
Cachd1	0	1.74418	0.694	0.178	0	mPRAT-ad3	Cachd1
Trabd2b	0	1.67021	0.654	0.207	0	mPRAT-ad3	Trabd2b
Atp2b4	0	1.6394	0.658	0.185	0	mPRAT-ad3	Atp2b4
Cyp2e1	0	1.51683	0.887	0.417	0	mPRAT-ad3	Cyp2e1
Bcar3	0	1.43159	0.72	0.301	0	mPRAT-ad3	Bcar3
Ccdc80	0	1.38307	0.727	0.322	0	mPRAT-ad3	Ccdc80
Cmip	0	1.35404	0.538	0.148	0	mPRAT-ad3	Cmip
Gm31522	0	1.32246	0.285	0.03	0	mPRAT-ad3	Gm31522
Smoc1	0	1.25654	0.843	0.507	0	mPRAT-ad3	Smoc1
Ghr	0	1.22457	0.99	0.921	0	mPRAT-ad3	Ghr
Car3	0	1.20958	0.981	0.78	0	mPRAT-ad3	Car3
Slc1a3	0	1.16718	0.975	0.818	0	mPRAT-ad3	Slc1a3
Chst1	0	1.15646	0.468	0.111	0	mPRAT-ad3	Chst1
Tshr	4.95221e-292	1.56756	0.584	0.208	9.85391e-288	mPRAT-ad3	Tshr
Utrn	2.31111e-291	0.823599	0.966	0.845	4.59865e-287	mPRAT-ad3	Utrn
Olfr1033	3.08085e-290	1.94061	0.303	0.043	6.13028e-286	mPRAT-ad3	Olfr1033
Nrip1	3.05259e-289	1.11581	0.897	0.643	6.07405e-285	mPRAT-ad3	Nrip1
Slc7a10	2.67586e-287	1.15584	0.493	0.13	5.32443e-283	mPRAT-ad3	Slc7a10
Tenm4	2.12242e-286	0.924248	0.948	0.791	4.22319e-282	mPRAT-ad3	Tenm4
Sntb1	1.87941e-278	1.17098	0.831	0.517	3.73966e-274	mPRAT-ad3	Sntb1
Cidec	6.76131e-275	1.02328	0.931	0.732	1.34537e-270	mPRAT-ad3	Cidec
Rbms3	7.06191e-274	1.27463	0.545	0.184	1.40518e-269	mPRAT-ad3	Rbms3
Gm12811	7.13808e-273	1.29684	0.384	0.086	1.42034e-268	mPRAT-ad3	Gm12811
Plcl1	1.69869e-272	1.42952	0.399	0.093	3.38005e-268	mPRAT-ad3	Plcl1
Adcy5	2.4218e-269	1.4888	0.54	0.187	4.81891e-265	mPRAT-ad3	Adcy5
Slc1a5	2.51966e-268	0.790008	0.977	0.893	5.01363e-264	mPRAT-ad3	Slc1a5
Clmn	1.51239e-262	1.16149	0.654	0.278	3.00936e-258	mPRAT-ad3	Clmn
Igf1	1.54728e-257	1.30888	0.577	0.216	3.07879e-253	mPRAT-ad3	Igf1
Auts2	1.06283e-252	1.36453	0.476	0.141	2.11482e-248	mPRAT-ad3	Auts2
Prr16	1.05618e-250	1.27435	0.469	0.138	2.10159e-246	mPRAT-ad3	Prr16
Ifi27l2a	2.58769e-250	1.13499	0.447	0.132	5.14899e-246	mPRAT-ad3	Ifi27l2a
Ar	6.16478e-241	1.27971	0.607	0.262	1.22667e-236	mPRAT-ad3	Ar
Lrmda	2.05311e-239	0.840851	0.96	0.823	4.08528e-235	mPRAT-ad3	Lrmda
Adamts12	3.7535e-236	1.13355	0.637	0.29	7.46872e-232	mPRAT-ad3	Adamts12
Apol6	2.25321e-232	0.988518	0.695	0.35	4.48344e-228	mPRAT-ad3	Apol6
Nnat	7.10534e-232	1.50779	0.442	0.13	1.41382e-227	mPRAT-ad3	Nnat
Celsr2	1.46098e-231	0.792067	0.298	0.054	2.90706e-227	mPRAT-ad3	Celsr2
Tcf7l2	1.51575e-230	0.96395	0.869	0.615	3.01604e-226	mPRAT-ad3	Tcf7l2
Plin4	2.96217e-228	1.00572	0.82	0.542	5.89413e-224	mPRAT-ad3	Plin4
Scn7a	2.60649e-219	0.970499	0.455	0.146	5.1864e-215	mPRAT-ad3	Scn7a
Dst	3.55831e-218	0.924242	0.838	0.579	7.08032e-214	mPRAT-ad3	Dst
Abi3bp	5.81348e-216	1.14256	0.482	0.179	1.15677e-211	mPRAT-ad3	Abi3bp
Ednra	1.34152e-214	0.874305	0.274	0.05	2.66936e-210	mPRAT-ad3	Ednra
Podn	1.08229e-213	1.04544	0.587	0.258	2.15355e-209	mPRAT-ad3	Podn
Ctdspl	1.19258e-210	0.902061	0.885	0.609	2.373e-206	mPRAT-ad3	Ctdspl
Fmnl2	4.20397e-210	1.13911	0.615	0.291	8.36506e-206	mPRAT-ad3	Fmnl2
Retn	7.42025e-210	0.913497	0.419	0.129	1.47648e-205	mPRAT-ad3	Retn
Plcb1	6.34407e-208	0.909324	0.851	0.565	1.26234e-203	mPRAT-ad3	Plcb1
Art3	2.66703e-202	0.929943	0.826	0.569	5.30685e-198	mPRAT-ad3	Art3
Plaat3	5.65362e-200	1.12654	0.662	0.357	1.12496e-195	mPRAT-ad3	Plaat3
Dram1	1.31899e-198	0.973149	0.654	0.328	2.62453e-194	mPRAT-ad3	Dram1
Gulp1	1.14885e-193	1.31202	0.58	0.27	2.28598e-189	mPRAT-ad3	Gulp1
Zeb2	5.18153e-187	0.883881	0.902	0.722	1.03102e-182	mPRAT-ad3	Zeb2
Pank3	5.66127e-186	0.998249	0.63	0.336	1.12648e-181	mPRAT-ad3	Pank3
Abcd2	1.61292e-185	1.00144	0.668	0.364	3.20939e-181	mPRAT-ad3	Abcd2
Trf	4.09215e-185	1.12219	0.31	0.079	8.14256e-181	mPRAT-ad3	Trf
Dock11	2.26959e-184	1.05848	0.338	0.094	4.51603e-180	mPRAT-ad3	Dock11
Eepd1	2.68832e-175	0.867887	0.641	0.323	5.34921e-171	mPRAT-ad3	Eepd1
Car5b	7.1928e-174	0.923636	0.551	0.252	1.43122e-169	mPRAT-ad3	Car5b
Sorbs1	6.13366e-172	0.569843	0.984	0.929	1.22048e-167	mPRAT-ad3	Sorbs1
Acvr1c	8.91604e-172	0.798696	0.87	0.676	1.77411e-167	mPRAT-ad3	Acvr1c
Tmem120b	9.043e-171	0.814157	0.889	0.668	1.79938e-166	mPRAT-ad3	Tmem120b
Asph	8.01068e-169	0.844831	0.769	0.467	1.59397e-164	mPRAT-ad3	Asph
Rasa3	1.63651e-167	0.951246	0.586	0.282	3.25632e-163	mPRAT-ad3	Rasa3
Cfd	2.5938e-167	0.920922	0.588	0.299	5.16114e-163	mPRAT-ad3	Cfd
Igfbp4	4.90312e-165	0.728993	0.287	0.075	9.75623e-161	mPRAT-ad3	Igfbp4
Igfbp7	1.17397e-161	1.05194	0.26	0.061	2.33597e-157	mPRAT-ad3	Igfbp7
Plpp3	5.43783e-159	0.972053	0.513	0.231	1.08202e-154	mPRAT-ad3	Plpp3
Gda	1.49401e-158	0.915452	0.328	0.103	2.97279e-154	mPRAT-ad3	Gda
Por	7.53125e-155	0.654964	0.946	0.838	1.49857e-150	mPRAT-ad3	Por
B3galt2	2.38796e-154	0.857222	0.514	0.237	4.75156e-150	mPRAT-ad3	B3galt2
Mir99ahg	6.2486e-153	0.815772	0.861	0.709	1.24335e-148	mPRAT-ad3	Mir99ahg
Mfng	1.80195e-152	0.682942	0.273	0.073	3.58553e-148	mPRAT-ad3	Mfng
Pdzrn3	4.91926e-152	0.895973	0.707	0.432	9.78835e-148	mPRAT-ad3	Pdzrn3
Ces1f	1.58513e-148	0.800905	0.443	0.184	3.1541e-144	mPRAT-ad3	Ces1f
Cadps2	2.91918e-147	0.898764	0.403	0.157	5.80858e-143	mPRAT-ad3	Cadps2
Pde3b	2.50085e-145	0.577604	0.977	0.936	4.9762e-141	mPRAT-ad3	Pde3b
Gsn	1.89996e-144	0.77309	0.459	0.193	3.78054e-140	mPRAT-ad3	Gsn
Lgals12	6.85782e-143	0.824899	0.572	0.305	1.36457e-138	mPRAT-ad3	Lgals12
Mapk6	1.56085e-141	0.843176	0.493	0.23	3.10578e-137	mPRAT-ad3	Mapk6
Papss2	4.01903e-136	0.691216	0.322	0.108	7.99706e-132	mPRAT-ad3	Papss2
Klhl2	5.92694e-136	0.820446	0.667	0.403	1.17934e-131	mPRAT-ad3	Klhl2
Sema5a	5.18197e-135	0.886603	0.382	0.151	1.03111e-130	mPRAT-ad3	Sema5a
Fgfr1	3.32406e-134	0.793727	0.593	0.331	6.61422e-130	mPRAT-ad3	Fgfr1
Erbb4	1.12356e-133	1.28046	0.635	0.42	2.23565e-129	mPRAT-ad3	Erbb4
Dock91	5.11082e-133	0.783013	0.854	0.654	1.01695e-128	mPRAT-ad3	Dock9
Pik3r1	2.75109e-127	0.704783	0.937	0.817	5.47412e-123	mPRAT-ad3	Pik3r1
Phldb1	3.85934e-127	0.713917	0.522	0.262	7.67932e-123	mPRAT-ad3	Phldb1
Tshz2	4.79697e-127	0.826502	0.531	0.266	9.545e-123	mPRAT-ad3	Tshz2
Bcl2	1.99074e-126	0.909486	0.319	0.115	3.96118e-122	mPRAT-ad3	Bcl2
Nbea	2.94375e-126	0.761877	0.481	0.233	5.85748e-122	mPRAT-ad3	Nbea
Bcat2	1.73824e-125	0.712946	0.425	0.184	3.45874e-121	mPRAT-ad3	Bcat2
Pcx	1.78201e-125	0.585977	0.914	0.794	3.54584e-121	mPRAT-ad3	Pcx
Fry	1.63485e-122	0.563382	0.928	0.847	3.25302e-118	mPRAT-ad3	Fry
Lhfpl2	1.07374e-119	0.895403	0.304	0.108	2.13653e-115	mPRAT-ad3	Lhfpl2
Sh3glb2	1.32844e-118	0.666599	0.468	0.219	2.64333e-114	mPRAT-ad3	Sh3glb2
Fgf10	1.62136e-117	1.06603	0.43	0.205	3.22618e-113	mPRAT-ad3	Fgf10
Mcam	4.0096e-117	0.67007	0.406	0.18	7.97831e-113	mPRAT-ad3	Mcam
Cmklr1	3.66771e-116	0.606408	0.277	0.09	7.29801e-112	mPRAT-ad3	Cmklr1
Rhobtb1	1.36718e-114	0.706394	0.495	0.252	2.72042e-110	mPRAT-ad3	Rhobtb1
Heph	1.74002e-112	0.66795	0.368	0.153	3.46228e-108	mPRAT-ad3	Heph
St6galnac5	5.31017e-112	1.22906	0.335	0.137	1.05662e-107	mPRAT-ad3	St6galnac5
Tmem120a	4.38974e-111	0.718264	0.634	0.382	8.73471e-107	mPRAT-ad3	Tmem120a
Sulf2	5.87373e-110	0.701073	0.553	0.311	1.16875e-105	mPRAT-ad3	Sulf2
Trps1	1.51725e-109	0.724966	0.759	0.567	3.01901e-105	mPRAT-ad3	Trps1
Hipk2	3.78046e-109	0.684444	0.785	0.601	7.52236e-105	mPRAT-ad3	Hipk2
Atxn10	1.98572e-108	0.674157	0.552	0.311	3.95118e-104	mPRAT-ad3	Atxn10
Ankef1	3.13159e-108	0.537621	0.882	0.733	6.23125e-104	mPRAT-ad3	Ankef1
Dapk1	6.13234e-106	0.753058	0.554	0.304	1.22021e-101	mPRAT-ad3	Dapk1
Sgcd	7.26998e-106	0.529857	0.925	0.818	1.44658e-101	mPRAT-ad3	Sgcd
Phka2	1.44201e-105	0.780184	0.615	0.401	2.86931e-101	mPRAT-ad3	Phka2
Plce1	1.56684e-105	0.758031	0.521	0.291	3.1177e-101	mPRAT-ad3	Plce1
Gstz1	1.69144e-105	0.624546	0.62	0.38	3.36562e-101	mPRAT-ad3	Gstz1
Palm	8.46145e-104	0.547566	0.261	0.089	1.68366e-99	mPRAT-ad3	Palm
C9orf72	1.47548e-103	0.698577	0.544	0.316	2.9359e-99	mPRAT-ad3	C9orf72
Prnp	2.41402e-103	0.57073	0.269	0.095	4.80342e-99	mPRAT-ad3	Prnp
Gm16168	3.10144e-103	0.714464	0.795	0.617	6.17124e-99	mPRAT-ad3	Gm16168
Ehd2	9.17343e-101	0.592643	0.412	0.196	1.82533e-96	mPRAT-ad3	Ehd2
Irs1	2.52071e-100	0.670256	0.738	0.529	5.01572e-96	mPRAT-ad3	Irs1
Lama4	5.6914e-100	0.616605	0.855	0.729	1.13247e-95	mPRAT-ad3	Lama4
Glb1l2	1.6832e-99	0.59322	0.315	0.126	3.34923e-95	mPRAT-ad3	Glb1l2
Abca1	2.67391e-99	0.545522	0.841	0.652	5.32054e-95	mPRAT-ad3	Abca1
Gm5627	5.68016e-98	0.692834	0.266	0.097	1.13024e-93	mPRAT-ad3	Gm5627
A530016L24Rik	5.98356e-98	0.620492	0.465	0.233	1.19061e-93	mPRAT-ad3	A530016L24Rik
Dock10	1.30319e-97	0.668547	0.266	0.095	2.59309e-93	mPRAT-ad3	Dock10
Kcns3	4.96056e-96	0.569428	0.298	0.119	9.87052e-92	mPRAT-ad3	Kcns3
Gpat3	2.63579e-94	0.709127	0.6	0.37	5.24469e-90	mPRAT-ad3	Gpat3
Fkbp5	6.82529e-94	0.783021	0.425	0.207	1.3581e-89	mPRAT-ad3	Fkbp5
Ywhab	1.08495e-92	0.644866	0.539	0.319	2.15883e-88	mPRAT-ad3	Ywhab
Cept1	1.24629e-92	0.645217	0.506	0.293	2.47987e-88	mPRAT-ad3	Cept1
Gm16685	2.34288e-92	0.678228	0.336	0.149	4.66187e-88	mPRAT-ad3	Gm16685
Adgrg2	4.22295e-92	0.637867	0.3	0.123	8.40283e-88	mPRAT-ad3	Adgrg2
Pdzd2	8.79241e-92	0.61516	0.801	0.61	1.74951e-87	mPRAT-ad3	Pdzd2
9530026P05Rik	2.22308e-91	0.651265	0.816	0.651	4.42349e-87	mPRAT-ad3	9530026P05Rik
B3galt1	4.63214e-91	0.984926	0.261	0.099	9.21702e-87	mPRAT-ad3	B3galt1
Nnmt	7.83229e-91	0.559647	0.282	0.112	1.55847e-86	mPRAT-ad3	Nnmt
Syne1	7.90269e-91	0.633972	0.59	0.366	1.57248e-86	mPRAT-ad3	Syne1
Fgf14	1.63733e-89	0.760079	0.791	0.651	3.25796e-85	mPRAT-ad3	Fgf14
Mob3b	2.90602e-89	0.659679	0.505	0.289	5.78241e-85	mPRAT-ad3	Mob3b
Pxdn	2.26299e-88	0.721904	0.434	0.233	4.50291e-84	mPRAT-ad3	Pxdn
B2m	3.2577e-88	0.521147	0.383	0.182	6.48217e-84	mPRAT-ad3	B2m
Rexo5	3.5463e-88	0.598474	0.36	0.169	7.05644e-84	mPRAT-ad3	Rexo5
Slc27a1	6.83962e-88	0.620825	0.85	0.663	1.36095e-83	mPRAT-ad3	Slc27a1
Sybu	4.17421e-87	0.65085	0.357	0.169	8.30585e-83	mPRAT-ad3	Sybu
Pik3cb	2.19874e-85	0.633311	0.488	0.279	4.37506e-81	mPRAT-ad3	Pik3cb
Maml2	5.91827e-85	0.801837	0.482	0.276	1.17762e-80	mPRAT-ad3	Maml2
Zyg11a	6.05368e-85	0.668684	0.275	0.112	1.20456e-80	mPRAT-ad3	Zyg11a
Carmn	3.4718e-84	0.564989	0.332	0.148	6.90819e-80	mPRAT-ad3	Carmn
Negr1	4.06162e-84	0.4719	0.949	0.869	8.0818e-80	mPRAT-ad3	Negr1
Eya4	3.54898e-82	0.604576	0.503	0.287	7.06175e-78	mPRAT-ad3	Eya4
Snhg11	1.53753e-81	0.536211	0.273	0.108	3.05939e-77	mPRAT-ad3	Snhg11
Sdccag8	2.71711e-81	0.600327	0.66	0.462	5.40651e-77	mPRAT-ad3	Sdccag8
Pdgfc	1.7195e-80	0.6581	0.436	0.241	3.42145e-76	mPRAT-ad3	Pdgfc
Htra3	5.85555e-80	0.550639	0.314	0.142	1.16514e-75	mPRAT-ad3	Htra3
Malat1	6.56823e-80	0.292913	1	1	1.30695e-75	mPRAT-ad3	Malat1
Pygb	1.44423e-79	0.603557	0.473	0.272	2.87372e-75	mPRAT-ad3	Pygb
Hivep3	1.83541e-79	0.717475	0.485	0.285	3.65211e-75	mPRAT-ad3	Hivep3
Tmcc3	3.22124e-78	0.584292	0.623	0.415	6.40963e-74	mPRAT-ad3	Tmcc3
Mgst1	5.35751e-77	0.528512	0.507	0.3	1.06604e-72	mPRAT-ad3	Mgst1
Wscd2	2.20406e-75	0.494782	0.255	0.104	4.38563e-71	mPRAT-ad3	Wscd2
Dlc1	1.07489e-74	0.436124	0.952	0.913	2.13882e-70	mPRAT-ad3	Dlc1
Prr5l	1.6581e-74	0.513031	0.254	0.104	3.2993e-70	mPRAT-ad3	Prr5l
Cep170	4.07528e-74	0.641498	0.507	0.321	8.109e-70	mPRAT-ad3	Cep170
Zbtb20	1.87469e-73	0.287992	0.99	0.987	3.73026e-69	mPRAT-ad3	Zbtb20
Arap2	3.39034e-73	0.517715	0.277	0.123	6.7461e-69	mPRAT-ad3	Arap2
Adipoq	8.99552e-73	0.562509	0.544	0.347	1.78993e-68	mPRAT-ad3	Adipoq
Cdk14	9.23622e-73	0.540579	0.636	0.432	1.83782e-68	mPRAT-ad3	Cdk14
Dlg2	6.58298e-72	0.653441	0.492	0.298	1.30988e-67	mPRAT-ad3	Dlg2
Iqsec1	1.12865e-71	0.531508	0.534	0.336	2.24579e-67	mPRAT-ad3	Iqsec1
Dab2ip	1.37979e-71	0.453606	0.407	0.218	2.74551e-67	mPRAT-ad3	Dab2ip
Gm4876	2.03823e-71	0.586064	0.278	0.122	4.05566e-67	mPRAT-ad3	Gm4876
Pcdh7	1.09084e-70	0.696614	0.323	0.156	2.17055e-66	mPRAT-ad3	Pcdh7
Kdm7a	1.3427e-70	0.54276	0.572	0.374	2.6717e-66	mPRAT-ad3	Kdm7a
Nlrc5	1.63424e-70	0.484734	0.385	0.204	3.25181e-66	mPRAT-ad3	Nlrc5
Tcf7l1	2.42013e-70	0.633744	0.425	0.235	4.81558e-66	mPRAT-ad3	Tcf7l1
Abca8a	7.24149e-70	0.484336	0.276	0.118	1.44091e-65	mPRAT-ad3	Abca8a
Acvr1	3.40279e-69	0.587171	0.496	0.3	6.77088e-65	mPRAT-ad3	Acvr1
Hspg2	1.01241e-68	0.495545	0.419	0.231	2.0145e-64	mPRAT-ad3	Hspg2
Ttyh2	1.06105e-68	0.457926	0.306	0.145	2.11128e-64	mPRAT-ad3	Ttyh2
Phyhd1	2.8322e-67	0.557468	0.359	0.188	5.63551e-63	mPRAT-ad3	Phyhd1
Cpeb4	3.36979e-67	0.597406	0.637	0.461	6.70521e-63	mPRAT-ad3	Cpeb4
Mpp1	4.81131e-67	0.572543	0.353	0.185	9.57355e-63	mPRAT-ad3	Mpp1
Adrb3	1.06998e-66	0.507941	0.654	0.449	2.12905e-62	mPRAT-ad3	Adrb3
Atrnl1	1.41158e-66	0.482955	0.78	0.63	2.80877e-62	mPRAT-ad3	Atrnl1
Lima1	3.04058e-66	0.49656	0.306	0.147	6.05015e-62	mPRAT-ad3	Lima1
Slc22a4	3.96408e-66	0.545806	0.256	0.113	7.88773e-62	mPRAT-ad3	Slc22a4
Amotl2	4.34682e-66	0.482852	0.413	0.231	8.64931e-62	mPRAT-ad3	Amotl2
Mmd	4.57116e-66	0.564909	0.631	0.443	9.0957e-62	mPRAT-ad3	Mmd
Cast	5.20815e-66	0.585811	0.583	0.401	1.03632e-61	mPRAT-ad3	Cast
Kat2b	5.53943e-66	0.512246	0.665	0.482	1.10224e-61	mPRAT-ad3	Kat2b
Atxn1	1.3579e-65	0.474031	0.904	0.803	2.70194e-61	mPRAT-ad3	Atxn1
Aldh1l1	3.25734e-65	0.48065	0.312	0.151	6.48146e-61	mPRAT-ad3	Aldh1l1
Camk2d	2.19179e-64	0.492634	0.811	0.678	4.36121e-60	mPRAT-ad3	Camk2d
Rnf217	5.69089e-64	0.569037	0.428	0.247	1.13237e-59	mPRAT-ad3	Rnf217
Zfp423	8.42105e-64	0.49524	0.741	0.571	1.67562e-59	mPRAT-ad3	Zfp423
Baiap2	7.02378e-63	0.447544	0.253	0.113	1.39759e-58	mPRAT-ad3	Baiap2
Echdc1	7.83453e-63	0.596893	0.489	0.31	1.55892e-58	mPRAT-ad3	Echdc1
Lipe	1.68304e-61	0.339577	0.945	0.878	3.34891e-57	mPRAT-ad3	Lipe
A530020G20Rik	2.31626e-61	0.434052	0.503	0.32	4.6089e-57	mPRAT-ad3	A530020G20Rik
Net1	2.56606e-61	0.535881	0.347	0.184	5.10595e-57	mPRAT-ad3	Net1
Sfxn1	4.25113e-61	0.487959	0.535	0.348	8.45891e-57	mPRAT-ad3	Sfxn1
Epb41l2	2.71414e-60	0.524974	0.691	0.541	5.4006e-56	mPRAT-ad3	Epb41l2
Ivd	3.94949e-60	0.468715	0.497	0.308	7.85869e-56	mPRAT-ad3	Ivd
Ldah	5.07083e-60	0.498425	0.567	0.38	1.00899e-55	mPRAT-ad3	Ldah
Angpt1	1.03006e-58	0.550509	0.67	0.494	2.04962e-54	mPRAT-ad3	Angpt1
Gpc4	3.18904e-58	0.591021	0.346	0.191	6.34555e-54	mPRAT-ad3	Gpc4
Pten	4.42236e-58	0.534736	0.719	0.583	8.7996e-54	mPRAT-ad3	Pten
Angptl2	8.26149e-58	0.455074	0.299	0.151	1.64387e-53	mPRAT-ad3	Angptl2
Zfp697	8.59851e-58	0.494121	0.368	0.206	1.71093e-53	mPRAT-ad3	Zfp697
Acss3	1.67054e-57	0.41107	0.866	0.737	3.32404e-53	mPRAT-ad3	Acss3
Cyb5a	9.16345e-57	0.457385	0.513	0.325	1.82334e-52	mPRAT-ad3	Cyb5a
Srpk2	1.53052e-56	0.47336	0.68	0.515	3.04543e-52	mPRAT-ad3	Srpk2
Fign	1.95139e-56	0.558966	0.48	0.309	3.88287e-52	mPRAT-ad3	Fign
Gnai1	6.25921e-56	0.496715	0.431	0.257	1.24546e-51	mPRAT-ad3	Gnai1
Gnaq	1.08175e-54	0.393148	0.77	0.609	2.15246e-50	mPRAT-ad3	Gnaq
Cbfb	1.43063e-54	0.469775	0.335	0.184	2.84667e-50	mPRAT-ad3	Cbfb
Pard3b	1.78671e-54	0.467523	0.664	0.49	3.5552e-50	mPRAT-ad3	Pard3b
Acap2	1.81192e-54	0.455427	0.517	0.338	3.60535e-50	mPRAT-ad3	Acap2
Cep85l	1.81624e-54	0.439703	0.478	0.301	3.61395e-50	mPRAT-ad3	Cep85l
Phip	2.36835e-54	0.500914	0.512	0.339	4.71253e-50	mPRAT-ad3	Phip
Map4k3	3.8743e-54	0.425982	0.683	0.514	7.70908e-50	mPRAT-ad3	Map4k3
H2-K1	6.04286e-54	0.518238	0.417	0.247	1.20241e-49	mPRAT-ad3	H2-K1
Bnc2	1.10891e-53	0.550552	0.411	0.248	2.20651e-49	mPRAT-ad3	Bnc2
4933406I18Rik	1.62935e-53	0.357814	0.937	0.866	3.24207e-49	mPRAT-ad3	4933406I18Rik
Tns2	1.02025e-52	0.398892	0.358	0.201	2.03009e-48	mPRAT-ad3	Tns2
Mocs1	1.44799e-52	0.377175	0.299	0.157	2.88121e-48	mPRAT-ad3	Mocs1
Mat2a	1.97167e-52	0.474556	0.507	0.341	3.92323e-48	mPRAT-ad3	Mat2a
Wdpcp	1.39569e-51	0.503193	0.392	0.233	2.77714e-47	mPRAT-ad3	Wdpcp
Pfkfb1	2.10513e-51	0.410917	0.707	0.547	4.18879e-47	mPRAT-ad3	Pfkfb1
Me11	2.82584e-51	0.510991	0.597	0.424	5.62285e-47	mPRAT-ad3	Me1
Epb41l1	5.15854e-51	0.410425	0.635	0.453	1.02645e-46	mPRAT-ad3	Epb41l1
Adamts6	5.64609e-51	0.479505	0.253	0.127	1.12346e-46	mPRAT-ad3	Adamts6
Znrf2	8.30029e-51	0.477708	0.507	0.338	1.65159e-46	mPRAT-ad3	Znrf2
Msrb3	9.90806e-51	0.426455	0.738	0.581	1.9715e-46	mPRAT-ad3	Msrb3
Rbm47	1.4516e-50	0.450958	0.795	0.667	2.8884e-46	mPRAT-ad3	Rbm47
Fndc3b	1.90825e-50	0.359429	0.578	0.386	3.79704e-46	mPRAT-ad3	Fndc3b
Tle1	1.17405e-49	0.44266	0.409	0.251	2.33612e-45	mPRAT-ad3	Tle1
Gm12216	1.28533e-49	0.385517	0.275	0.142	2.55755e-45	mPRAT-ad3	Gm12216
Srebf1	1.1063e-48	0.376868	0.487	0.315	2.20131e-44	mPRAT-ad3	Srebf1
Stat1	2.51026e-48	0.339971	0.367	0.212	4.99492e-44	mPRAT-ad3	Stat1
Xdh	2.86921e-48	0.463409	0.485	0.314	5.70916e-44	mPRAT-ad3	Xdh
Slc16a7	5.29783e-48	0.439395	0.473	0.311	1.05416e-43	mPRAT-ad3	Slc16a7
Chdh	1.96693e-47	0.475603	0.388	0.236	3.9138e-43	mPRAT-ad3	Chdh
Gmds	2.38791e-47	0.469753	0.299	0.164	4.75147e-43	mPRAT-ad3	Gmds
Sec24b	2.49557e-47	0.427756	0.662	0.497	4.96569e-43	mPRAT-ad3	Sec24b
Prkd1	3.30131e-47	0.455517	0.722	0.575	6.56895e-43	mPRAT-ad3	Prkd1
Abhd15	5.24736e-47	0.404504	0.347	0.202	1.04412e-42	mPRAT-ad3	Abhd15
Chd7	8.6989e-47	0.435133	0.65	0.493	1.73091e-42	mPRAT-ad3	Chd7
Tead1	5.50106e-46	0.403666	0.726	0.532	1.0946e-41	mPRAT-ad3	Tead1
Hlcs	7.1232e-46	0.440631	0.322	0.182	1.41737e-41	mPRAT-ad3	Hlcs
Celf2	1.12751e-45	0.316482	0.946	0.915	2.24352e-41	mPRAT-ad3	Celf2
Irf2	3.53732e-45	0.528198	0.564	0.407	7.03856e-41	mPRAT-ad3	Irf2
Lrrc58	5.95133e-45	0.431913	0.553	0.392	1.1842e-40	mPRAT-ad3	Lrrc58
Nav3	6.26637e-45	0.397362	0.361	0.211	1.24688e-40	mPRAT-ad3	Nav3
Ube2e2	8.24292e-44	0.373865	0.809	0.687	1.64018e-39	mPRAT-ad3	Ube2e2
Rxra	2.01176e-43	0.419637	0.334	0.193	4.00301e-39	mPRAT-ad3	Rxra
Gfod2	2.23137e-43	0.450097	0.337	0.199	4.43997e-39	mPRAT-ad3	Gfod2
Aldh6a1	3.25971e-43	0.374698	0.53	0.37	6.48617e-39	mPRAT-ad3	Aldh6a1
Enpp2	3.29008e-43	0.44303	0.591	0.432	6.5466e-39	mPRAT-ad3	Enpp2
B430010I23Rik	8.0993e-43	0.403714	0.313	0.181	1.6116e-38	mPRAT-ad3	B430010I23Rik
Fabp4	2.25179e-42	0.352971	0.891	0.827	4.48061e-38	mPRAT-ad3	Fabp4
Sod1	4.11991e-42	0.312926	0.304	0.173	8.19779e-38	mPRAT-ad3	Sod1
Osbpl1a	5.81952e-42	0.372293	0.562	0.394	1.15797e-37	mPRAT-ad3	Osbpl1a
Kif13b	7.92305e-42	0.391247	0.512	0.357	1.57653e-37	mPRAT-ad3	Kif13b
Hip1	1.32389e-41	0.486901	0.362	0.225	2.63428e-37	mPRAT-ad3	Hip1
Atxn7l1	1.36902e-41	0.392369	0.733	0.574	2.72409e-37	mPRAT-ad3	Atxn7l1
Rgma	1.27833e-40	0.376403	0.327	0.19	2.54362e-36	mPRAT-ad3	Rgma
Nedd4	1.48034e-40	0.272796	0.917	0.851	2.94558e-36	mPRAT-ad3	Nedd4
Adhfe1	1.49478e-40	0.328773	0.631	0.453	2.97432e-36	mPRAT-ad3	Adhfe1
Pde1a	1.59574e-40	0.427117	0.579	0.428	3.17521e-36	mPRAT-ad3	Pde1a
Extl3	1.79879e-40	0.350172	0.503	0.344	3.57923e-36	mPRAT-ad3	Extl3
Jag1	2.82183e-40	0.348823	0.321	0.187	5.61488e-36	mPRAT-ad3	Jag1
Rps6ka3	5.47492e-40	0.492271	0.58	0.448	1.0894e-35	mPRAT-ad3	Rps6ka3
Rin2	6.17313e-40	0.403769	0.538	0.372	1.22833e-35	mPRAT-ad3	Rin2
Myo9a	6.98e-40	0.381692	0.436	0.289	1.38888e-35	mPRAT-ad3	Myo9a
Acadsb	8.72423e-40	0.344922	0.379	0.239	1.73595e-35	mPRAT-ad3	Acadsb
Cavin2	1.69316e-39	0.349143	0.46	0.301	3.36906e-35	mPRAT-ad3	Cavin2
Afap1	2.1903e-39	0.350823	0.607	0.453	4.35825e-35	mPRAT-ad3	Afap1
Rnf144a	6.12944e-39	0.409049	0.45	0.301	1.21964e-34	mPRAT-ad3	Rnf144a
Bckdhb	1.26177e-38	0.301133	0.864	0.783	2.51066e-34	mPRAT-ad3	Bckdhb
Ece1	2.97222e-38	0.439271	0.272	0.155	5.91411e-34	mPRAT-ad3	Ece1
Phlpp2	5.055e-38	0.326988	0.273	0.155	1.00584e-33	mPRAT-ad3	Phlpp2
Clec2d	8.70812e-38	0.35976	0.672	0.52	1.73274e-33	mPRAT-ad3	Clec2d
Cpeb2	9.63363e-38	0.416925	0.309	0.186	1.9169e-33	mPRAT-ad3	Cpeb2
Mtus1	1.26488e-37	0.371503	0.712	0.568	2.51687e-33	mPRAT-ad3	Mtus1
Gnptab	1.89398e-37	0.368801	0.36	0.226	3.76864e-33	mPRAT-ad3	Gnptab
Hspa12a	2.90636e-37	0.339092	0.333	0.204	5.78308e-33	mPRAT-ad3	Hspa12a
2023-03-03	3.02069e-37	0.403187	0.727	0.579	6.01057e-33	mPRAT-ad3	2023-03-03
Ttc3	3.35421e-37	0.383323	0.496	0.352	6.6742e-33	mPRAT-ad3	Ttc3
Cd1d1	5.78024e-37	0.30889	0.334	0.204	1.15015e-32	mPRAT-ad3	Cd1d1
Echdc2	1.94578e-36	0.260248	0.256	0.142	3.8717e-32	mPRAT-ad3	Echdc2
Tln2	1.13864e-35	0.38065	0.411	0.274	2.26567e-31	mPRAT-ad3	Tln2
Amotl1	1.19109e-35	0.328387	0.355	0.221	2.37004e-31	mPRAT-ad3	Amotl1
Lrp1	2.33901e-35	0.31815	0.555	0.401	4.65417e-31	mPRAT-ad3	Lrp1
Sbf2	5.63712e-35	0.340382	0.636	0.502	1.12167e-30	mPRAT-ad3	Sbf2
St3gal4	9.0683e-35	0.500483	0.447	0.309	1.80441e-30	mPRAT-ad3	St3gal4
Zfp809	1.79174e-34	0.330741	0.273	0.161	3.5652e-30	mPRAT-ad3	Zfp809
Ypel5	2.8769e-34	0.382403	0.331	0.209	5.72445e-30	mPRAT-ad3	Ypel5
Syne3	3.73406e-34	0.389477	0.308	0.188	7.43004e-30	mPRAT-ad3	Syne3
Tsc22d3	4.00011e-34	0.451617	0.435	0.302	7.95941e-30	mPRAT-ad3	Tsc22d3
Golgb1	5.59252e-34	0.309405	0.822	0.689	1.1128e-29	mPRAT-ad3	Golgb1
Mccc2	9.06429e-34	0.327032	0.436	0.295	1.80361e-29	mPRAT-ad3	Mccc2
Cep128	1.12189e-33	0.453468	0.28	0.169	2.23234e-29	mPRAT-ad3	Cep128
Fam126a	1.40306e-33	0.322523	0.297	0.18	2.79181e-29	mPRAT-ad3	Fam126a
Tacc1	3.70506e-33	0.396225	0.794	0.698	7.37232e-29	mPRAT-ad3	Tacc1
Tbl1x	4.03637e-33	0.350138	0.639	0.501	8.03157e-29	mPRAT-ad3	Tbl1x
Rnf24	4.18089e-33	0.319831	0.501	0.356	8.31914e-29	mPRAT-ad3	Rnf24
Steap4	6.34866e-33	0.481715	0.252	0.147	1.26326e-28	mPRAT-ad3	Steap4
Mccc1	8.95553e-33	0.30233	0.321	0.2	1.78197e-28	mPRAT-ad3	Mccc1
Clic4	1.18091e-32	0.434905	0.482	0.35	2.34978e-28	mPRAT-ad3	Clic4
Msra	3.8914e-32	0.370089	0.569	0.433	7.74312e-28	mPRAT-ad3	Msra
Ifngr1	9.17145e-32	0.268145	0.441	0.299	1.82494e-27	mPRAT-ad3	Ifngr1
Cpeb1	1.46051e-31	0.357522	0.478	0.342	2.90612e-27	mPRAT-ad3	Cpeb1
Taf15	3.7238e-31	0.301878	0.672	0.528	7.40962e-27	mPRAT-ad3	Taf15
Dhtkd1	7.45345e-31	0.262078	0.286	0.171	1.48309e-26	mPRAT-ad3	Dhtkd1
Wls	1.41807e-30	0.324822	0.479	0.341	2.82168e-26	mPRAT-ad3	Wls
Smad3	2.52684e-30	0.321773	0.436	0.299	5.02791e-26	mPRAT-ad3	Smad3
Yeats2	3.73874e-30	0.287554	0.255	0.151	7.43934e-26	mPRAT-ad3	Yeats2
Trarg1	4.12613e-30	0.309427	0.642	0.5	8.21018e-26	mPRAT-ad3	Trarg1
Blcap	5.21111e-30	0.313038	0.515	0.382	1.03691e-25	mPRAT-ad3	Blcap
Whamm	7.77898e-30	0.254956	0.27	0.164	1.54786e-25	mPRAT-ad3	Whamm
Trappc6b	9.59123e-30	0.305672	0.391	0.265	1.90846e-25	mPRAT-ad3	Trappc6b
Aff1	1.49984e-29	0.332981	0.586	0.452	2.98439e-25	mPRAT-ad3	Aff1
Hacd2	2.91836e-29	0.250124	0.858	0.738	5.80696e-25	mPRAT-ad3	Hacd2
Rasa2	3.51494e-29	0.291084	0.304	0.191	6.99402e-25	mPRAT-ad3	Rasa2
Bag4	5.56918e-29	0.266777	0.291	0.183	1.10816e-24	mPRAT-ad3	Bag4
Lmo4	6.82967e-29	0.295525	0.262	0.157	1.35897e-24	mPRAT-ad3	Lmo4
Man2a1	8.12624e-29	0.295995	0.418	0.289	1.61696e-24	mPRAT-ad3	Man2a1
Stag1	8.92766e-29	0.291975	0.686	0.56	1.77643e-24	mPRAT-ad3	Stag1
Camkmt	9.5679e-29	0.34268	0.463	0.336	1.90382e-24	mPRAT-ad3	Camkmt
Ccdc50	9.57033e-29	0.308486	0.462	0.334	1.9043e-24	mPRAT-ad3	Ccdc50
Lpl	1.35087e-28	0.305111	0.876	0.816	2.68797e-24	mPRAT-ad3	Lpl
Bche	1.44565e-28	0.321887	0.258	0.156	2.87656e-24	mPRAT-ad3	Bche
Tnrc6c	3.6817e-28	0.272333	0.655	0.517	7.32584e-24	mPRAT-ad3	Tnrc6c
Meis2	5.1781e-28	0.362056	0.524	0.4	1.03034e-23	mPRAT-ad3	Meis2
Met	5.26817e-28	0.29091	0.397	0.271	1.04826e-23	mPRAT-ad3	Met
Ddx5	5.34888e-28	0.289033	0.704	0.566	1.06432e-23	mPRAT-ad3	Ddx5
Setbp1	6.10796e-28	0.366204	0.548	0.42	1.21536e-23	mPRAT-ad3	Setbp1
Mycbp2	6.77272e-28	0.27021	0.755	0.65	1.34764e-23	mPRAT-ad3	Mycbp2
Bcl9	6.7827e-28	0.285614	0.271	0.168	1.34962e-23	mPRAT-ad3	Bcl9
Aco1	1.36124e-27	0.30864	0.6	0.472	2.7086e-23	mPRAT-ad3	Aco1
Svil	1.50543e-27	0.31853	0.498	0.361	2.9955e-23	mPRAT-ad3	Svil
Ano10	1.95988e-27	0.279884	0.358	0.24	3.89978e-23	mPRAT-ad3	Ano10
Tacc2	2.76993e-27	0.293486	0.373	0.254	5.51161e-23	mPRAT-ad3	Tacc2
Pid1	3.02689e-27	0.385703	0.542	0.417	6.02291e-23	mPRAT-ad3	Pid1
Akap8l	3.30325e-27	0.285487	0.606	0.464	6.57281e-23	mPRAT-ad3	Akap8l
Zfp608	3.97691e-27	0.30705	0.262	0.162	7.91326e-23	mPRAT-ad3	Zfp608
1110019D14Rik	5.02332e-27	0.375413	0.369	0.257	9.99541e-23	mPRAT-ad3	1110019D14Rik
Pxmp4	5.38749e-27	0.267796	0.334	0.221	1.072e-22	mPRAT-ad3	Pxmp4
Ankrd44	6.50125e-27	0.300449	0.435	0.31	1.29362e-22	mPRAT-ad3	Ankrd44
Mrap	7.06036e-27	0.2642	0.48	0.349	1.40487e-22	mPRAT-ad3	Mrap
Sort1	1.58128e-26	0.296316	0.512	0.383	3.14644e-22	mPRAT-ad3	Sort1
Ermp1	1.63681e-26	0.289538	0.311	0.204	3.25693e-22	mPRAT-ad3	Ermp1
Pank2	1.94361e-26	0.257746	0.377	0.258	3.86739e-22	mPRAT-ad3	Pank2
Ces1d	2.37284e-26	0.26384	0.831	0.737	4.72147e-22	mPRAT-ad3	Ces1d
Parva	3.92793e-26	0.276495	0.464	0.332	7.81579e-22	mPRAT-ad3	Parva
4930412C18Rik	3.96394e-26	0.33395	0.26	0.163	7.88744e-22	mPRAT-ad3	4930412C18Rik
Peli1	2.68781e-25	0.438802	0.367	0.262	5.3482e-21	mPRAT-ad3	Peli1
Lnx2	2.74384e-25	0.274756	0.293	0.189	5.45969e-21	mPRAT-ad3	Lnx2
Ak2	2.90832e-25	0.29572	0.648	0.505	5.78698e-21	mPRAT-ad3	Ak2
Phc3	3.39087e-25	0.253206	0.455	0.329	6.74716e-21	mPRAT-ad3	Phc3
Cdyl2	3.83639e-25	0.287127	0.306	0.2	7.63364e-21	mPRAT-ad3	Cdyl2
Neo1	4.02708e-25	0.273878	0.369	0.256	8.01308e-21	mPRAT-ad3	Neo1
Chchd6	4.6963e-25	0.263824	0.471	0.342	9.3447e-21	mPRAT-ad3	Chchd6
Abhd5	6.39017e-25	0.295555	0.49	0.365	1.27152e-20	mPRAT-ad3	Abhd5
Mcph1	8.20978e-25	0.318789	0.414	0.297	1.63358e-20	mPRAT-ad3	Mcph1
Acsm3	9.67711e-25	0.272699	0.372	0.255	1.92555e-20	mPRAT-ad3	Acsm3
Erc1	1.17419e-24	0.271807	0.602	0.476	2.33641e-20	mPRAT-ad3	Erc1
Bcl9l	1.43655e-24	0.257311	0.444	0.318	2.85845e-20	mPRAT-ad3	Bcl9l
Ext1	1.70826e-24	0.320807	0.789	0.693	3.39909e-20	mPRAT-ad3	Ext1
Magi1	2.14241e-24	0.279815	0.265	0.167	4.26297e-20	mPRAT-ad3	Magi1
Mecp2	2.71455e-24	0.283552	0.5	0.377	5.40141e-20	mPRAT-ad3	Mecp2
Zfp950	4.02583e-24	0.255373	0.352	0.243	8.0106e-20	mPRAT-ad3	Zfp950
Mitf	5.26177e-24	0.36318	0.477	0.359	1.04699e-19	mPRAT-ad3	Mitf
Smad6	7.77053e-24	0.254716	0.483	0.355	1.54618e-19	mPRAT-ad3	Smad6
Tgfbr3	1.27643e-23	0.276417	0.786	0.686	2.53985e-19	mPRAT-ad3	Tgfbr3
Gm11266	1.49902e-23	0.258518	0.346	0.237	2.98274e-19	mPRAT-ad3	Gm11266
Eml5	1.85689e-23	0.291084	0.438	0.325	3.69485e-19	mPRAT-ad3	Eml5
Lyst	1.94543e-23	0.270185	0.536	0.413	3.87101e-19	mPRAT-ad3	Lyst
Sav1	1.94597e-23	0.259688	0.363	0.254	3.8721e-19	mPRAT-ad3	Sav1
Bmpr1a	3.66468e-23	0.253885	0.579	0.46	7.29198e-19	mPRAT-ad3	Bmpr1a
Rab3gap2	3.72191e-23	0.251874	0.371	0.262	7.40586e-19	mPRAT-ad3	Rab3gap2
Rock2	7.10834e-23	0.256302	0.653	0.528	1.41442e-18	mPRAT-ad3	Rock2
Pikfyve	8.97462e-23	0.28006	0.55	0.435	1.78577e-18	mPRAT-ad3	Pikfyve
Dgat1	3.08894e-22	0.295683	0.624	0.507	6.14637e-18	mPRAT-ad3	Dgat1
Apex2	3.3439e-22	0.286677	0.485	0.369	6.6537e-18	mPRAT-ad3	Apex2
Gab1	5.62523e-22	0.273364	0.448	0.331	1.11931e-17	mPRAT-ad3	Gab1
Syde2	8.28235e-22	0.259171	0.304	0.207	1.64802e-17	mPRAT-ad3	Syde2
Reep5	9.30869e-22	0.251062	0.371	0.264	1.85224e-17	mPRAT-ad3	Reep5
Plekha5	1.21797e-21	0.291699	0.324	0.225	2.42352e-17	mPRAT-ad3	Plekha5
Cox16	1.43069e-21	0.253013	0.683	0.567	2.8468e-17	mPRAT-ad3	Cox16
Slc6a6	1.4386e-21	0.290479	0.514	0.393	2.86253e-17	mPRAT-ad3	Slc6a6
Fhit	1.54507e-21	0.268829	0.765	0.655	3.07439e-17	mPRAT-ad3	Fhit
Pnpla3	1.69228e-21	0.363587	0.637	0.545	3.36729e-17	mPRAT-ad3	Pnpla3
Anxa6	2.67867e-21	0.25261	0.52	0.399	5.33002e-17	mPRAT-ad3	Anxa6
Esr1	2.8935e-21	0.283911	0.583	0.459	5.75749e-17	mPRAT-ad3	Esr1
Ppp2r1b	3.18464e-21	0.264661	0.417	0.308	6.33681e-17	mPRAT-ad3	Ppp2r1b
Acbd4	4.43898e-21	0.269603	0.339	0.239	8.83269e-17	mPRAT-ad3	Acbd4
Arhgap23	1.03424e-20	0.297346	0.341	0.242	2.05793e-16	mPRAT-ad3	Arhgap23
Dram2	3.85332e-20	0.28355	0.4	0.297	7.66733e-16	mPRAT-ad3	Dram2
Ahnak	3.95248e-20	0.274218	0.614	0.486	7.86465e-16	mPRAT-ad3	Ahnak
Cpq	5.58067e-20	0.250749	0.6	0.486	1.11044e-15	mPRAT-ad3	Cpq
Zfand3	6.25044e-20	0.252086	0.8	0.707	1.24371e-15	mPRAT-ad3	Zfand3
Rbms2	1.56841e-19	0.273265	0.387	0.285	3.12082e-15	mPRAT-ad3	Rbms2
Ppa1	7.19978e-19	0.303643	0.402	0.3	1.43261e-14	mPRAT-ad3	Ppa1
Upp2	1.79485e-18	0.299094	0.406	0.302	3.57138e-14	mPRAT-ad3	Upp2
Mllt3	2.33222e-18	0.281256	0.374	0.276	4.64065e-14	mPRAT-ad3	Mllt3
Uhrf1bp1l	1.73358e-17	0.267705	0.439	0.339	3.44947e-13	mPRAT-ad3	Uhrf1bp1l
Stard13	5.38437e-17	0.287177	0.67	0.584	1.07138e-12	mPRAT-ad3	Stard13
Adamts9	9.83609e-17	0.253702	0.278	0.196	1.95718e-12	mPRAT-ad3	Adamts9
Gm33037	6.35483e-16	0.262308	0.27	0.192	1.26448e-11	mPRAT-ad3	Gm33037
St3gal61	1.61584e-15	0.252505	0.352	0.261	3.2152e-11	mPRAT-ad3	St3gal6
Tmem45b1	1.18124e-14	0.596779	0.573	0.563	2.35043e-10	mPRAT-ad3	Tmem45b
Farp1	1.23339e-14	0.261125	0.283	0.209	2.4542e-10	mPRAT-ad3	Farp1
Auts21	0	2.13788	0.821	0.162	0	mPRAT-ad4	Auts2
Slc7a101	0	2.0488	0.818	0.158	0	mPRAT-ad4	Slc7a10
Aldh1a1	0	2.01688	0.638	0.055	0	mPRAT-ad4	Aldh1a1
Trhde	0	1.92523	0.511	0.037	0	mPRAT-ad4	Trhde
Alcam	0	1.9135	0.471	0.029	0	mPRAT-ad4	Alcam
Pcdh71	0	1.85774	0.702	0.146	0	mPRAT-ad4	Pcdh7
Bnc21	0	1.80371	0.815	0.235	0	mPRAT-ad4	Bnc2
Prr161	0	1.79607	0.725	0.168	0	mPRAT-ad4	Prr16
Tshz21	0	1.74418	0.879	0.276	0	mPRAT-ad4	Tshz2
Col15a1	0	1.61182	0.455	0.035	0	mPRAT-ad4	Col15a1
Lrrc4c	0	1.60155	0.445	0.017	0	mPRAT-ad4	Lrrc4c
App	0	1.48399	0.549	0.089	0	mPRAT-ad4	App
Cmklr11	0	1.43144	0.569	0.092	0	mPRAT-ad4	Cmklr1
Ptprk	0	1.42497	0.317	0.017	0	mPRAT-ad4	Ptprk
Zfpm2	0	1.38039	0.445	0.049	0	mPRAT-ad4	Zfpm2
Chst12	0	1.27758	0.703	0.147	0	mPRAT-ad4	Chst1
Rasgrf2	0	1.26627	0.416	0.045	0	mPRAT-ad4	Rasgrf2
Srgap1	0	1.26469	0.363	0.012	0	mPRAT-ad4	Srgap1
Ccnd2	0	1.09786	0.391	0.016	0	mPRAT-ad4	Ccnd2
Trim14	0	1.07463	0.461	0.062	0	mPRAT-ad4	Trim14
Itga6	0	0.885114	0.346	0.031	0	mPRAT-ad4	Itga6
Zfp462	0	0.854816	0.283	0.014	0	mPRAT-ad4	Zfp462
Gm36860	0	0.71746	0.33	0.025	0	mPRAT-ad4	Gm36860
Eepd11	1.90187e-307	2.03102	0.885	0.352	3.78435e-303	mPRAT-ad4	Eepd1
Nnat1	4.00883e-305	2.20076	0.676	0.159	7.97677e-301	mPRAT-ad4	Nnat
Slc6a13	4.01636e-305	0.86355	0.38	0.041	7.99176e-301	mPRAT-ad4	Slc6a13
Rbms31	6.50386e-301	1.64166	0.774	0.222	1.29414e-296	mPRAT-ad4	Rbms3
Fads3	1.98208e-297	0.954694	0.425	0.055	3.94395e-293	mPRAT-ad4	Fads3
Dock101	2.67937e-293	1.46951	0.538	0.097	5.33142e-289	mPRAT-ad4	Dock10
Plxdc2	5.06301e-291	1.33032	0.365	0.039	1.00744e-286	mPRAT-ad4	Plxdc2
Gm48761	1.71178e-288	1.84088	0.571	0.119	3.40611e-284	mPRAT-ad4	Gm4876
Synpo2	2.42977e-281	0.838728	0.25	0.014	4.83476e-277	mPRAT-ad4	Synpo2
Glb1l21	1.39098e-278	1.1946	0.603	0.129	2.76777e-274	mPRAT-ad4	Glb1l2
Cachd11	1.2386e-276	1.61684	0.817	0.252	2.46457e-272	mPRAT-ad4	Cachd1
Scn7a1	7.19709e-271	1.19592	0.695	0.174	1.43208e-266	mPRAT-ad4	Scn7a
Grb10	7.90721e-255	1.05259	0.429	0.066	1.57338e-250	mPRAT-ad4	Grb10
Tcaf1	2.43959e-254	0.974635	0.39	0.055	4.85429e-250	mPRAT-ad4	Tcaf1
Lhfpl21	3.90877e-254	1.46483	0.549	0.117	7.77766e-250	mPRAT-ad4	Lhfpl2
Jazf1	7.12268e-249	1.22176	0.498	0.097	1.41727e-244	mPRAT-ad4	Jazf1
Carmn1	1.50394e-243	1.09269	0.625	0.15	2.99253e-239	mPRAT-ad4	Carmn
Adrb31	1.82492e-243	1.60774	0.907	0.458	3.63123e-239	mPRAT-ad4	Adrb3
Apbb2	3.01069e-242	0.996067	0.497	0.095	5.99067e-238	mPRAT-ad4	Apbb2
Slit31	8.19357e-226	1.37947	0.948	0.454	1.63036e-221	mPRAT-ad4	Slit3
Gpt2	1.91615e-224	0.94923	0.439	0.078	3.81275e-220	mPRAT-ad4	Gpt2
Tshr1	2.83394e-224	1.59681	0.742	0.255	5.63898e-220	mPRAT-ad4	Tshr
Atp2b41	9.82821e-223	1.18827	0.778	0.252	1.95562e-218	mPRAT-ad4	Atp2b4
Tanc2	3.27459e-219	0.707468	0.304	0.037	6.51577e-215	mPRAT-ad4	Tanc2
Cmip1	1.40842e-216	1.15693	0.687	0.199	2.80248e-212	mPRAT-ad4	Cmip
Cald1	9.56902e-216	0.674238	0.288	0.033	1.90404e-211	mPRAT-ad4	Cald1
Npr3	4.79847e-215	1.8855	0.501	0.117	9.54799e-211	mPRAT-ad4	Npr3
2010016I18Rik	2.03469e-214	0.823827	0.405	0.069	4.04862e-210	mPRAT-ad4	2010016I18Rik
Qsox1	1.06795e-213	0.599501	0.275	0.029	2.12501e-209	mPRAT-ad4	Qsox1
Col5a3	8.99168e-213	0.758028	0.256	0.025	1.78917e-208	mPRAT-ad4	Col5a3
Dtna	1.29068e-207	0.957967	0.345	0.052	2.56819e-203	mPRAT-ad4	Dtna
Cers6	7.19049e-205	0.848985	0.352	0.054	1.43076e-200	mPRAT-ad4	Cers6
Apcdd1	2.62147e-203	0.77309	0.383	0.065	5.21621e-199	mPRAT-ad4	Apcdd1
Pdzrn31	3.31272e-196	1.33376	0.891	0.46	6.59165e-192	mPRAT-ad4	Pdzrn3
Ccdc801	2.19412e-194	1.27308	0.875	0.375	4.36587e-190	mPRAT-ad4	Ccdc80
Kirrel	1.26525e-193	1.07558	0.522	0.129	2.51759e-189	mPRAT-ad4	Kirrel
Htra31	1.29751e-193	1.10922	0.553	0.147	2.58179e-189	mPRAT-ad4	Htra3
Ghr1	3.30014e-192	1.30277	1	0.931	6.56662e-188	mPRAT-ad4	Ghr
Fry1	8.22483e-189	1.06675	0.989	0.854	1.63658e-184	mPRAT-ad4	Fry
Mast4	6.17953e-188	1.27547	0.669	0.224	1.2296e-183	mPRAT-ad4	Mast4
Adamts5	1.37281e-187	1.40937	0.358	0.064	2.73162e-183	mPRAT-ad4	Adamts5
Nid1	1.39561e-187	0.851747	0.397	0.078	2.77698e-183	mPRAT-ad4	Nid1
Rasa21	4.59906e-185	1.13429	0.59	0.182	9.15121e-181	mPRAT-ad4	Rasa2
Gsn1	6.6015e-185	1.07261	0.679	0.215	1.31357e-180	mPRAT-ad4	Gsn
Peg3	5.6178e-182	1.02665	0.355	0.063	1.11783e-177	mPRAT-ad4	Peg3
Dst1	6.16747e-179	1.14584	0.942	0.612	1.2272e-174	mPRAT-ad4	Dst
Tenm41	9.35577e-179	1.09481	0.992	0.813	1.86161e-174	mPRAT-ad4	Tenm4
Plcb11	3.39632e-177	1.20017	0.952	0.603	6.75801e-173	mPRAT-ad4	Plcb1
Slc2a13	6.06205e-176	0.891958	0.396	0.079	1.20623e-171	mPRAT-ad4	Slc2a13
Egfr	1.55208e-174	0.973907	0.355	0.066	3.08833e-170	mPRAT-ad4	Egfr
Lrmda1	2.53284e-173	1.11362	0.99	0.843	5.03985e-169	mPRAT-ad4	Lrmda
Cpne8	4.96916e-170	0.642349	0.329	0.057	9.88764e-166	mPRAT-ad4	Cpne8
Palm1	2.23625e-168	0.720225	0.44	0.1	4.44968e-164	mPRAT-ad4	Palm
Nav31	1.50533e-167	1.08564	0.626	0.21	2.9953e-163	mPRAT-ad4	Nav3
Tspan5	1.93637e-164	0.880393	0.37	0.075	3.85298e-160	mPRAT-ad4	Tspan5
Slc2a3	6.63573e-163	0.865223	0.344	0.064	1.32038e-158	mPRAT-ad4	Slc2a3
Pkp2	1.371e-162	0.971473	0.42	0.1	2.72802e-158	mPRAT-ad4	Pkp2
Utrn1	5.7297e-162	0.825855	0.99	0.863	1.1401e-157	mPRAT-ad4	Utrn
Retn1	1.05139e-161	0.84601	0.564	0.163	2.09205e-157	mPRAT-ad4	Retn
Myo1d	2.33029e-161	0.569709	0.264	0.039	4.6368e-157	mPRAT-ad4	Myo1d
Ppm1h	6.81972e-161	0.689724	0.338	0.063	1.35699e-156	mPRAT-ad4	Ppm1h
4931428L18Rik	8.10736e-161	1.10432	0.661	0.239	1.6132e-156	mPRAT-ad4	4931428L18Rik
Adgrl2	1.70969e-160	0.666316	0.286	0.045	3.40194e-156	mPRAT-ad4	Adgrl2
Dock111	4.47593e-160	0.917307	0.473	0.121	8.9062e-156	mPRAT-ad4	Dock11
Lep	1.72146e-159	0.870158	0.476	0.126	3.42537e-155	mPRAT-ad4	Lep
Gnai11	4.77041e-158	1.2375	0.669	0.263	9.49216e-154	mPRAT-ad4	Gnai1
Plin41	9.76909e-158	1.06745	0.947	0.576	1.94385e-153	mPRAT-ad4	Plin4
Bcl21	3.3364e-157	0.923071	0.491	0.132	6.63876e-153	mPRAT-ad4	Bcl2
Dram11	4.0657e-157	1.045	0.805	0.367	8.08994e-153	mPRAT-ad4	Dram1
Bcar31	1.03291e-155	1.15314	0.818	0.362	2.05528e-151	mPRAT-ad4	Bcar3
Sh3d19	8.96081e-154	0.765321	0.471	0.124	1.78302e-149	mPRAT-ad4	Sh3d19
Hoxc8	4.05521e-153	0.615967	0.366	0.075	8.06905e-149	mPRAT-ad4	Hoxc8
Phgdh	4.78155e-153	0.617433	0.349	0.071	9.51433e-149	mPRAT-ad4	Phgdh
Cntln	1.34318e-149	0.651831	0.346	0.07	2.67266e-145	mPRAT-ad4	Cntln
Plcl11	1.52124e-149	1.09614	0.487	0.135	3.02696e-145	mPRAT-ad4	Plcl1
Sntb11	4.08975e-148	1.10388	0.92	0.561	8.13778e-144	mPRAT-ad4	Sntb1
Lrrk2	9.33033e-148	0.457607	0.289	0.05	1.85655e-143	mPRAT-ad4	Lrrk2
Trabd2b1	1.43635e-147	1.06332	0.718	0.276	2.85805e-143	mPRAT-ad4	Trabd2b
Fndc3b1	1.54928e-147	1.09226	0.799	0.396	3.08275e-143	mPRAT-ad4	Fndc3b
Lgals121	1.58264e-146	0.934439	0.772	0.329	3.14914e-142	mPRAT-ad4	Lgals12
Magi11	3.44996e-143	1.04223	0.511	0.159	6.86474e-139	mPRAT-ad4	Magi1
Lpgat1	7.91921e-143	1.38598	0.701	0.312	1.57576e-138	mPRAT-ad4	Lpgat1
Apol61	8.69236e-142	0.9441	0.832	0.394	1.72961e-137	mPRAT-ad4	Apol6
Chrdl1	1.36733e-141	0.831017	0.336	0.07	2.72071e-137	mPRAT-ad4	Chrdl1
Itga7	1.37714e-141	0.689389	0.447	0.12	2.74024e-137	mPRAT-ad4	Itga7
Nav1	1.59717e-141	0.821881	0.414	0.105	3.17806e-137	mPRAT-ad4	Nav1
Heph1	7.12448e-141	0.806109	0.546	0.171	1.41763e-136	mPRAT-ad4	Heph
Cyp2e11	8.07741e-141	0.974597	0.918	0.493	1.60724e-136	mPRAT-ad4	Cyp2e1
Pde7a	1.90233e-140	1.05617	0.623	0.235	3.78526e-136	mPRAT-ad4	Pde7a
Plpp31	1.62393e-139	1.01377	0.673	0.262	3.23129e-135	mPRAT-ad4	Plpp3
Cpne2	3.77858e-139	0.472301	0.276	0.048	7.51862e-135	mPRAT-ad4	Cpne2
Snhg111	5.02342e-139	0.75714	0.446	0.118	9.99561e-135	mPRAT-ad4	Snhg11
Sema5a1	9.27435e-139	0.870584	0.546	0.173	1.84541e-134	mPRAT-ad4	Sema5a
Usp35	1.22204e-138	0.555377	0.339	0.071	2.43161e-134	mPRAT-ad4	Usp35
Ablim2	2.34804e-136	0.600498	0.407	0.103	4.67212e-132	mPRAT-ad4	Ablim2
Zbtb7c	2.66447e-136	0.893157	0.428	0.117	5.30177e-132	mPRAT-ad4	Zbtb7c
Art31	5.09268e-136	1.08974	0.922	0.603	1.01334e-131	mPRAT-ad4	Art3
Ptger3	6.16912e-135	1.18836	0.439	0.125	1.22753e-130	mPRAT-ad4	Ptger3
Mfng1	1.06897e-134	0.608992	0.389	0.095	2.12704e-130	mPRAT-ad4	Mfng
Fgf2	3.2968e-132	0.571571	0.331	0.071	6.55997e-128	mPRAT-ad4	Fgf2
Hip11	3.86823e-132	1.04804	0.604	0.224	7.69701e-128	mPRAT-ad4	Hip1
Anxa2	8.41867e-130	0.69335	0.345	0.08	1.67515e-125	mPRAT-ad4	Anxa2
Plcl2	1.85477e-129	0.60159	0.273	0.051	3.69063e-125	mPRAT-ad4	Plcl2
Sh3tc1	2.54028e-128	0.529037	0.371	0.09	5.05465e-124	mPRAT-ad4	Sh3tc1
Sgce	1.07288e-127	0.686508	0.436	0.123	2.13482e-123	mPRAT-ad4	Sgce
Epb41l21	5.95554e-127	0.961967	0.879	0.547	1.18503e-122	mPRAT-ad4	Epb41l2
Arap21	8.40597e-127	0.69909	0.451	0.131	1.67262e-122	mPRAT-ad4	Arap2
Adap1	1.31981e-126	0.524114	0.32	0.07	2.62615e-122	mPRAT-ad4	Adap1
Antxr2	3.03047e-125	0.655929	0.416	0.115	6.03004e-121	mPRAT-ad4	Antxr2
Adcy51	3.00424e-124	0.921755	0.631	0.237	5.97784e-120	mPRAT-ad4	Adcy5
Igf11	8.92524e-124	0.975244	0.669	0.267	1.77594e-119	mPRAT-ad4	Igf1
Nbea1	1.14182e-123	0.827558	0.652	0.257	2.272e-119	mPRAT-ad4	Nbea
Sgcd1	3.62631e-123	0.863318	0.966	0.832	7.21563e-119	mPRAT-ad4	Sgcd
Cacna2d1	1.18128e-122	0.633148	0.259	0.048	2.35052e-118	mPRAT-ad4	Cacna2d1
Klhl29	3.4727e-120	0.580501	0.275	0.054	6.90998e-116	mPRAT-ad4	Klhl29
Abcd21	8.44153e-120	0.871215	0.81	0.4	1.6797e-115	mPRAT-ad4	Abcd2
Mpp7	1.25119e-119	1.03765	0.836	0.502	2.48962e-115	mPRAT-ad4	Mpp7
Rin21	2.29095e-118	0.965487	0.76	0.378	4.55852e-114	mPRAT-ad4	Rin2
Adamts121	1.23402e-117	0.928129	0.744	0.338	2.45544e-113	mPRAT-ad4	Adamts12
Pvt1	4.42112e-117	0.612496	0.378	0.1	8.79715e-113	mPRAT-ad4	Pvt1
Pam	1.56416e-116	0.721337	0.383	0.105	3.11236e-112	mPRAT-ad4	Pam
Sec24d	7.97519e-116	0.512875	0.339	0.083	1.5869e-111	mPRAT-ad4	Sec24d
Amotl11	9.6567e-116	0.701076	0.594	0.219	1.92149e-111	mPRAT-ad4	Amotl1
Hebp1	1.3064e-115	0.555688	0.422	0.122	2.59947e-111	mPRAT-ad4	Hebp1
Emp1	1.75517e-115	0.616826	0.259	0.051	3.49244e-111	mPRAT-ad4	Emp1
Mmp28	7.78262e-115	0.638047	0.418	0.122	1.54859e-110	mPRAT-ad4	Mmp28
Adam15	1.68049e-114	0.587861	0.373	0.098	3.34384e-110	mPRAT-ad4	Adam15
Fam126a1	5.52975e-113	0.673991	0.518	0.178	1.10031e-108	mPRAT-ad4	Fam126a
Pwwp3a	1.5152e-112	0.630951	0.562	0.2	3.01494e-108	mPRAT-ad4	Pwwp3a
Raver2	6.38172e-112	0.530273	0.265	0.054	1.26984e-107	mPRAT-ad4	Raver2
Pbx1	1.55716e-111	1.01688	0.903	0.618	3.09845e-107	mPRAT-ad4	Pbx1
Olfml1	2.1559e-111	0.490825	0.255	0.05	4.2898e-107	mPRAT-ad4	Olfml1
Gab2	2.21116e-111	0.968815	0.626	0.269	4.39977e-107	mPRAT-ad4	Gab2
Sorbs11	4.6974e-111	0.623699	0.997	0.937	9.34689e-107	mPRAT-ad4	Sorbs1
Cd1d11	6.78039e-110	0.72424	0.551	0.204	1.34916e-105	mPRAT-ad4	Cd1d1
Slc22a41	1.0057e-109	0.600841	0.413	0.121	2.00115e-105	mPRAT-ad4	Slc22a4
Ifi27l2a1	1.35011e-109	0.559496	0.526	0.177	2.68644e-105	mPRAT-ad4	Ifi27l2a
Ttyh21	2.03169e-109	0.571146	0.474	0.155	4.04266e-105	mPRAT-ad4	Ttyh2
Zeb21	4.99781e-109	0.898042	0.948	0.747	9.94464e-105	mPRAT-ad4	Zeb2
Mertk	1.59116e-108	0.540576	0.457	0.142	3.16609e-104	mPRAT-ad4	Mertk
Man1a	2.28687e-108	0.595948	0.279	0.062	4.55042e-104	mPRAT-ad4	Man1a
Xdh1	3.54777e-108	0.671264	0.724	0.319	7.05935e-104	mPRAT-ad4	Xdh
E230016M11Rik	1.09905e-107	0.460468	0.291	0.067	2.18689e-103	mPRAT-ad4	E230016M11Rik
Cd47	1.62083e-106	0.507159	0.424	0.13	3.22512e-102	mPRAT-ad4	Cd47
Dapk11	1.81327e-106	0.864487	0.719	0.33	3.60805e-102	mPRAT-ad4	Dapk1
Rtn4rl1	2.00808e-106	0.628518	0.301	0.073	3.99567e-102	mPRAT-ad4	Rtn4rl1
Npr2	4.02627e-106	0.376478	0.27	0.058	8.01148e-102	mPRAT-ad4	Npr2
Maml21	8.67511e-106	0.934765	0.658	0.293	1.72617e-101	mPRAT-ad4	Maml2
Tanc1	1.01053e-105	0.593685	0.46	0.149	2.01075e-101	mPRAT-ad4	Tanc1
Maf	1.69916e-105	0.574704	0.413	0.125	3.38098e-101	mPRAT-ad4	Maf
Rassf8	1.05328e-104	0.586622	0.474	0.159	2.09582e-100	mPRAT-ad4	Rassf8
Dmxl2	1.77106e-104	0.659582	0.503	0.18	3.52405e-100	mPRAT-ad4	Dmxl2
Itgb5	2.21469e-104	0.551412	0.418	0.13	4.4068e-100	mPRAT-ad4	Itgb5
Rnf144b	3.21147e-104	0.60155	0.292	0.069	6.39018e-100	mPRAT-ad4	Rnf144b
Hivep31	8.88348e-104	0.753	0.685	0.299	1.76763e-99	mPRAT-ad4	Hivep3
Atrnl11	1.98897e-101	0.796999	0.918	0.641	3.95766e-97	mPRAT-ad4	Atrnl1
Ppfibp1	4.24769e-101	0.662859	0.561	0.216	8.45205e-97	mPRAT-ad4	Ppfibp1
Pdgfc1	8.02772e-101	0.772623	0.615	0.256	1.59736e-96	mPRAT-ad4	Pdgfc
Mmd1	3.01213e-100	0.867373	0.804	0.457	5.99353e-96	mPRAT-ad4	Mmd
2810407A14Rik	4.26709e-100	0.486838	0.323	0.084	8.49065e-96	mPRAT-ad4	2810407A14Rik
Ctps2	1.11317e-99	0.549128	0.432	0.139	2.21498e-95	mPRAT-ad4	Ctps2
Rgl1	1.83227e-99	0.526088	0.349	0.098	3.64585e-95	mPRAT-ad4	Rgl1
Sh3glb21	2.40592e-99	0.594421	0.621	0.245	4.78731e-95	mPRAT-ad4	Sh3glb2
Samd4	2.63416e-99	0.845031	0.296	0.076	5.24145e-95	mPRAT-ad4	Samd4
Kcns31	6.87781e-99	0.535524	0.425	0.136	1.36855e-94	mPRAT-ad4	Kcns3
Zfhx4	7.2645e-99	0.673819	0.296	0.074	1.44549e-94	mPRAT-ad4	Zfhx4
Smoc11	7.55599e-99	0.797949	0.9	0.558	1.50349e-94	mPRAT-ad4	Smoc1
Car31	1.28973e-97	0.670514	0.989	0.813	2.56631e-93	mPRAT-ad4	Car3
Platr25	9.24481e-97	0.471916	0.416	0.132	1.83953e-92	mPRAT-ad4	Platr25
Trf1	2.82459e-96	0.599838	0.374	0.112	5.62038e-92	mPRAT-ad4	Trf
Nap1l1	9.09727e-96	0.546216	0.477	0.168	1.81017e-91	mPRAT-ad4	Nap1l1
Cnksr3	1.36639e-95	0.501455	0.398	0.123	2.71885e-91	mPRAT-ad4	Cnksr3
Baiap21	2.52949e-95	0.470031	0.397	0.122	5.03319e-91	mPRAT-ad4	Baiap2
Pik3cb1	2.83354e-95	0.720742	0.664	0.297	5.63818e-91	mPRAT-ad4	Pik3cb
B3galt11	3.21529e-95	0.873905	0.375	0.115	6.39778e-91	mPRAT-ad4	B3galt1
C4b	5.17051e-95	0.546245	0.284	0.07	1.02883e-90	mPRAT-ad4	C4b
Mcam1	1.74802e-94	0.558446	0.537	0.205	3.4782e-90	mPRAT-ad4	Mcam
Brox	2.49368e-94	0.452396	0.346	0.1	4.96192e-90	mPRAT-ad4	Brox
Smo	3.77811e-94	0.377729	0.331	0.09	7.51768e-90	mPRAT-ad4	Smo
Itih5	3.83416e-94	0.779249	0.559	0.233	7.6292e-90	mPRAT-ad4	Itih5
Gm112661	5.04875e-93	0.658329	0.572	0.232	1.0046e-88	mPRAT-ad4	Gm11266
Cidec1	6.41384e-93	0.742913	0.958	0.762	1.27623e-88	mPRAT-ad4	Cidec
Tln21	3.26569e-92	0.678077	0.625	0.276	6.49808e-88	mPRAT-ad4	Tln2
Asph1	5.74454e-92	0.726044	0.862	0.508	1.14305e-87	mPRAT-ad4	Asph
Dab2ip1	7.4816e-92	0.547352	0.582	0.232	1.48869e-87	mPRAT-ad4	Dab2ip
Gm1976	1.74435e-91	0.397925	0.296	0.077	3.4709e-87	mPRAT-ad4	Gm1976
Nod1	2.34757e-91	0.436926	0.41	0.133	4.6712e-87	mPRAT-ad4	Nod1
Tacc21	3.4666e-91	0.538527	0.609	0.25	6.89784e-87	mPRAT-ad4	Tacc2
Ehd21	6.55637e-91	0.558436	0.553	0.218	1.30459e-86	mPRAT-ad4	Ehd2
Atxn101	7.92056e-91	0.61368	0.716	0.335	1.57603e-86	mPRAT-ad4	Atxn10
Ednra1	1.99756e-89	0.485621	0.308	0.084	3.97474e-85	mPRAT-ad4	Ednra
Phldb11	2.16875e-89	0.614565	0.662	0.292	4.31538e-85	mPRAT-ad4	Phldb1
Ar1	2.7573e-89	0.681226	0.677	0.313	5.48648e-85	mPRAT-ad4	Ar
Slc1a51	7.01711e-89	0.583258	0.994	0.906	1.39626e-84	mPRAT-ad4	Slc1a5
Arfgap2	9.33994e-89	0.400984	0.327	0.094	1.85846e-84	mPRAT-ad4	Arfgap2
Agfg2	2.09325e-88	0.446693	0.412	0.136	4.16515e-84	mPRAT-ad4	Agfg2
Cdon	3.05165e-88	0.467423	0.364	0.113	6.07217e-84	mPRAT-ad4	Cdon
Hoxc5	3.44742e-88	0.33653	0.292	0.076	6.85967e-84	mPRAT-ad4	Hoxc5
Mid2	6.18049e-88	0.455213	0.414	0.138	1.22979e-83	mPRAT-ad4	Mid2
Ctdspl1	6.87656e-88	0.736939	0.934	0.65	1.3683e-83	mPRAT-ad4	Ctdspl
Sec16b	2.37821e-87	0.366101	0.253	0.06	4.73216e-83	mPRAT-ad4	Sec16b
Bcat21	3.82288e-87	0.605324	0.543	0.212	7.60678e-83	mPRAT-ad4	Bcat2
Gda1	2.2658e-86	0.579143	0.398	0.133	4.50848e-82	mPRAT-ad4	Gda
Mapre2	2.99691e-86	0.455194	0.323	0.093	5.96326e-82	mPRAT-ad4	Mapre2
Lasp1	1.02299e-84	0.381178	0.361	0.112	2.03554e-80	mPRAT-ad4	Lasp1
2610035D17Rik	1.28614e-84	0.700171	0.319	0.093	2.55916e-80	mPRAT-ad4	2610035D17Rik
Gstz11	2.132e-84	0.632467	0.79	0.404	4.24224e-80	mPRAT-ad4	Gstz1
Gm44148	2.90416e-84	0.361352	0.267	0.068	5.7787e-80	mPRAT-ad4	Gm44148
Fsd2	5.06212e-84	0.321173	0.272	0.07	1.00726e-79	mPRAT-ad4	Fsd2
Cdk141	1.84722e-83	0.763744	0.782	0.451	3.67559e-79	mPRAT-ad4	Cdk14
Fbxo45	1.94645e-82	0.420538	0.377	0.123	3.87304e-78	mPRAT-ad4	Fbxo45
Phyhd11	2.19391e-82	0.538278	0.512	0.202	4.36544e-78	mPRAT-ad4	Phyhd1
Olfr10331	3.05874e-82	0.470301	0.307	0.086	6.08628e-78	mPRAT-ad4	Olfr1033
Smarca2	7.06097e-82	0.639701	0.741	0.375	1.40499e-77	mPRAT-ad4	Smarca2
Mob3b1	1.66883e-81	0.648646	0.66	0.309	3.32064e-77	mPRAT-ad4	Mob3b
Crppa	9.70376e-81	0.442836	0.262	0.068	1.93085e-76	mPRAT-ad4	Crppa
Spata6	9.95676e-81	0.404144	0.321	0.096	1.9812e-76	mPRAT-ad4	Spata6
Efemp1	1.13484e-80	0.599442	0.319	0.097	2.25811e-76	mPRAT-ad4	Efemp1
Gm48832	1.23263e-80	0.573051	0.289	0.082	2.45269e-76	mPRAT-ad4	Gm48832
Gm56271	2.25828e-80	0.675321	0.354	0.116	4.49353e-76	mPRAT-ad4	Gm5627
Ptk2b	3.2097e-80	0.494828	0.476	0.182	6.38667e-76	mPRAT-ad4	Ptk2b
Psen2	3.43154e-80	0.389903	0.292	0.083	6.82807e-76	mPRAT-ad4	Psen2
Tram2	1.23721e-79	0.367173	0.254	0.065	2.46181e-75	mPRAT-ad4	Tram2
Abca11	2.08343e-79	0.629026	0.927	0.675	4.14561e-75	mPRAT-ad4	Abca1
C9orf721	3.00823e-79	0.648479	0.681	0.341	5.98577e-75	mPRAT-ad4	C9orf72
BC035947	6.12428e-79	0.327912	0.256	0.067	1.21861e-74	mPRAT-ad4	BC035947
Rad51b	6.32954e-79	0.719158	0.404	0.144	1.25945e-74	mPRAT-ad4	Rad51b
Pard6g	8.4521e-79	0.397261	0.25	0.064	1.6818e-74	mPRAT-ad4	Pard6g
Ctif	9.3388e-79	0.704674	0.81	0.466	1.85823e-74	mPRAT-ad4	Ctif
Tmem120a1	2.51538e-78	0.633854	0.774	0.41	5.00511e-74	mPRAT-ad4	Tmem120a
Aldh1l11	3.19617e-78	0.509662	0.447	0.165	6.35974e-74	mPRAT-ad4	Aldh1l1
Fgf101	5.82468e-78	0.835905	0.529	0.233	1.15899e-73	mPRAT-ad4	Fgf10
Adamts61	1.21372e-77	0.532493	0.385	0.135	2.41507e-73	mPRAT-ad4	Adamts6
Mta3	2.07846e-77	0.470184	0.568	0.243	4.13573e-73	mPRAT-ad4	Mta3
Slf1	3.21958e-77	0.429962	0.372	0.125	6.40631e-73	mPRAT-ad4	Slf1
Rasa31	5.15299e-77	0.566765	0.691	0.323	1.02534e-72	mPRAT-ad4	Rasa3
Clmn1	5.28399e-77	0.596714	0.699	0.337	1.05141e-72	mPRAT-ad4	Clmn
Gm16263	1.87933e-76	0.389284	0.273	0.077	3.73949e-72	mPRAT-ad4	Gm16263
Hoxc6	2.20202e-76	0.379353	0.328	0.102	4.38158e-72	mPRAT-ad4	Hoxc6
Gpat31	4.49118e-76	0.774319	0.735	0.395	8.93656e-72	mPRAT-ad4	Gpat3
Slc9a6	8.57892e-76	0.461767	0.32	0.1	1.70703e-71	mPRAT-ad4	Slc9a6
Malt1	9.26841e-76	0.323332	0.316	0.097	1.84423e-71	mPRAT-ad4	Malt1
Adarb1	1.95841e-75	0.372217	0.346	0.112	3.89685e-71	mPRAT-ad4	Adarb1
Hoxc4	2.64289e-75	0.334426	0.316	0.097	5.25881e-71	mPRAT-ad4	Hoxc4
Crim1	3.44091e-75	0.542974	0.307	0.096	6.84672e-71	mPRAT-ad4	Crim1
Zfp970	3.63297e-75	0.381257	0.308	0.095	7.22888e-71	mPRAT-ad4	Zfp970
Pced1b	3.73131e-75	0.427632	0.339	0.109	7.42457e-71	mPRAT-ad4	Pced1b
Mir99ahg1	6.12588e-75	0.679934	0.919	0.728	1.21893e-70	mPRAT-ad4	Mir99ahg
Ywhab1	6.39107e-75	0.56619	0.685	0.341	1.2717e-70	mPRAT-ad4	Ywhab
Gli2	6.44563e-75	0.421168	0.257	0.07	1.28255e-70	mPRAT-ad4	Gli2
Nnmt1	1.69557e-74	0.3808	0.381	0.131	3.37385e-70	mPRAT-ad4	Nnmt
Hipk21	2.12906e-74	0.687252	0.889	0.622	4.2364e-70	mPRAT-ad4	Hipk2
Klhl5	3.76053e-74	0.461383	0.488	0.197	7.48271e-70	mPRAT-ad4	Klhl5
Tsc22d31	7.8286e-74	0.691403	0.63	0.305	1.55773e-69	mPRAT-ad4	Tsc22d3
St3gal41	7.9142e-74	0.707688	0.647	0.312	1.57477e-69	mPRAT-ad4	St3gal4
Fmr1	8.24361e-74	0.664772	0.42	0.16	1.64031e-69	mPRAT-ad4	Fmr1
Fbxl4	2.70224e-73	0.412607	0.462	0.181	5.37692e-69	mPRAT-ad4	Fbxl4
Ttc7b	6.72102e-73	0.608008	0.661	0.338	1.33735e-68	mPRAT-ad4	Ttc7b
Abi3bp1	9.19472e-73	0.57194	0.527	0.225	1.82956e-68	mPRAT-ad4	Abi3bp
Nos3	9.88104e-73	0.365821	0.251	0.069	1.96613e-68	mPRAT-ad4	Nos3
Hspa12a1	1.41685e-72	0.437592	0.506	0.209	2.81926e-68	mPRAT-ad4	Hspa12a
Klhl21	6.43063e-72	0.651375	0.782	0.435	1.27957e-67	mPRAT-ad4	Klhl2
Sdccag81	1.08655e-71	0.632052	0.815	0.479	2.16202e-67	mPRAT-ad4	Sdccag8
Fam20c	1.73667e-71	0.557975	0.357	0.125	3.45562e-67	mPRAT-ad4	Fam20c
E130307A14Rik	2.11896e-71	0.437952	0.394	0.143	4.21632e-67	mPRAT-ad4	E130307A14Rik
Pxdn1	2.35152e-71	0.541397	0.572	0.253	4.67906e-67	mPRAT-ad4	Pxdn
Rock21	2.50477e-71	0.742668	0.807	0.534	4.98399e-67	mPRAT-ad4	Rock2
Cmbl	6.39971e-71	0.355151	0.367	0.128	1.27341e-66	mPRAT-ad4	Cmbl
2700081O15Rik	6.74037e-71	0.333	0.303	0.094	1.3412e-66	mPRAT-ad4	2700081O15Rik
Zfp976	1.45989e-70	0.345489	0.308	0.096	2.90489e-66	mPRAT-ad4	Zfp976
Sufu	1.74164e-70	0.411834	0.505	0.211	3.46551e-66	mPRAT-ad4	Sufu
Arhgef6	2.93159e-70	0.370208	0.299	0.094	5.83328e-66	mPRAT-ad4	Arhgef6
Hprt	1.33698e-69	0.445545	0.397	0.151	2.66032e-65	mPRAT-ad4	Hprt
Nlrc51	1.82763e-69	0.4537	0.518	0.221	3.63663e-65	mPRAT-ad4	Nlrc5
Ptprs	2.04649e-69	0.341935	0.357	0.124	4.0721e-65	mPRAT-ad4	Ptprs
Znrf21	2.09423e-69	0.553797	0.685	0.348	4.16711e-65	mPRAT-ad4	Znrf2
Cep1701	2.26384e-69	0.642889	0.654	0.338	4.50458e-65	mPRAT-ad4	Cep170
Ephb2	5.44903e-69	0.385314	0.284	0.087	1.08425e-64	mPRAT-ad4	Ephb2
Ift43	8.45969e-69	0.296069	0.33	0.108	1.68331e-64	mPRAT-ad4	Ift43
Cuedc1	1.07545e-68	0.405296	0.551	0.24	2.13992e-64	mPRAT-ad4	Cuedc1
Apex21	5.28466e-68	0.68569	0.692	0.368	1.05154e-63	mPRAT-ad4	Apex2
Isoc1	8.37698e-68	0.253419	0.281	0.084	1.66685e-63	mPRAT-ad4	Isoc1
Zc2hc1a	8.42906e-68	0.354017	0.337	0.115	1.67721e-63	mPRAT-ad4	Zc2hc1a
Eef2k	1.01727e-67	0.338199	0.325	0.107	2.02416e-63	mPRAT-ad4	Eef2k
Spaca6	1.31889e-67	0.403728	0.457	0.183	2.62434e-63	mPRAT-ad4	Spaca6
A530016L24Rik1	4.42269e-67	0.386286	0.582	0.26	8.80026e-63	mPRAT-ad4	A530016L24Rik
Gprin3	9.07148e-67	0.615907	0.371	0.138	1.80504e-62	mPRAT-ad4	Gprin3
St5	9.58215e-67	0.40075	0.3	0.097	1.90666e-62	mPRAT-ad4	St5
Car5b1	1.0551e-66	0.507991	0.628	0.294	2.09945e-62	mPRAT-ad4	Car5b
Dock4	1.46494e-66	0.636365	0.609	0.304	2.91494e-62	mPRAT-ad4	Dock4
Bckdhb1	1.52965e-66	0.549944	0.948	0.788	3.0437e-62	mPRAT-ad4	Bckdhb
Gpr146	3.71787e-66	0.328116	0.361	0.128	7.39782e-62	mPRAT-ad4	Gpr146
Cpeb11	7.97879e-66	0.571784	0.66	0.346	1.58762e-61	mPRAT-ad4	Cpeb1
Cyp4f17	1.16192e-65	0.462682	0.267	0.082	2.31199e-61	mPRAT-ad4	Cyp4f17
Gm122161	2.07406e-65	0.330776	0.402	0.151	4.12697e-61	mPRAT-ad4	Gm12216
D3Ertd751e	4.56685e-65	0.427855	0.463	0.192	9.08713e-61	mPRAT-ad4	D3Ertd751e
Stk39	6.8354e-65	0.452768	0.446	0.182	1.36011e-60	mPRAT-ad4	Stk39
Amotl21	7.57903e-65	0.452992	0.548	0.248	1.50808e-60	mPRAT-ad4	Amotl2
Nrip11	1.05167e-64	0.489455	0.957	0.68	2.09261e-60	mPRAT-ad4	Nrip1
2210408I21Rik	1.23414e-64	0.565186	0.595	0.286	2.45569e-60	mPRAT-ad4	2210408I21Rik
Zfp6081	1.90172e-64	0.499602	0.41	0.164	3.78405e-60	mPRAT-ad4	Zfp608
Jag11	2.10266e-64	0.412433	0.465	0.195	4.18387e-60	mPRAT-ad4	Jag1
Zfp704	2.37896e-64	0.407553	0.388	0.146	4.73365e-60	mPRAT-ad4	Zfp704
Slc38a6	3.37934e-64	0.456193	0.563	0.259	6.72421e-60	mPRAT-ad4	Slc38a6
Gkap1	3.55585e-64	0.320447	0.436	0.172	7.07542e-60	mPRAT-ad4	Gkap1
Mapk61	8.92092e-64	0.527431	0.567	0.267	1.77509e-59	mPRAT-ad4	Mapk6
Rnf141	1.06961e-63	0.251701	0.292	0.094	2.12831e-59	mPRAT-ad4	Rnf141
Dixdc1	1.45811e-63	0.406258	0.314	0.107	2.90135e-59	mPRAT-ad4	Dixdc1
Klhdc8b	1.78616e-63	0.404414	0.461	0.188	3.55409e-59	mPRAT-ad4	Klhdc8b
9330159F19Rik	2.58504e-63	0.409166	0.274	0.087	5.14371e-59	mPRAT-ad4	9330159F19Rik
Plekhm3	2.75555e-63	0.3364	0.441	0.179	5.483e-59	mPRAT-ad4	Plekhm3
Iqsec11	3.3765e-63	0.500699	0.684	0.354	6.71856e-59	mPRAT-ad4	Iqsec1
Plxna2	4.09668e-63	0.625405	0.572	0.287	8.15157e-59	mPRAT-ad4	Plxna2
Nck2	6.44392e-63	0.321752	0.296	0.098	1.28221e-58	mPRAT-ad4	Nck2
Prkd2	1.02327e-62	0.371229	0.303	0.102	2.03611e-58	mPRAT-ad4	Prkd2
Creb3l2	1.3839e-62	0.391987	0.412	0.165	2.75369e-58	mPRAT-ad4	Creb3l2
Ankef11	1.66481e-62	0.538589	0.933	0.753	3.31265e-58	mPRAT-ad4	Ankef1
Cdc42ep1	2.85186e-62	0.264845	0.254	0.077	5.67463e-58	mPRAT-ad4	Cdc42ep1
Wscd21	6.66434e-62	0.311252	0.34	0.121	1.32607e-57	mPRAT-ad4	Wscd2
Mgst3	6.91286e-62	0.308777	0.266	0.083	1.37552e-57	mPRAT-ad4	Mgst3
Srpk21	1.41423e-61	0.599167	0.817	0.529	2.81404e-57	mPRAT-ad4	Srpk2
Map3k4	1.50003e-61	0.266256	0.366	0.134	2.98477e-57	mPRAT-ad4	Map3k4
Tmem43	2.46485e-61	0.302211	0.309	0.105	4.90455e-57	mPRAT-ad4	Tmem43
Man2a11	6.00525e-61	0.474393	0.601	0.293	1.19493e-56	mPRAT-ad4	Man2a1
Sulf21	8.21645e-61	0.457704	0.678	0.339	1.63491e-56	mPRAT-ad4	Sulf2
Ankrd441	9.84337e-61	0.511962	0.614	0.313	1.95863e-56	mPRAT-ad4	Ankrd44
Osbpl8	1.59913e-60	0.623807	0.631	0.333	3.18195e-56	mPRAT-ad4	Osbpl8
Net11	1.84517e-60	0.450106	0.466	0.199	3.67152e-56	mPRAT-ad4	Net1
Tbc1d19	2.34804e-60	0.263454	0.314	0.108	4.67213e-56	mPRAT-ad4	Tbc1d19
Plekhg5	2.80021e-60	0.278329	0.251	0.076	5.57185e-56	mPRAT-ad4	Plekhg5
Zbtb4	3.72064e-60	0.28313	0.311	0.107	7.40332e-56	mPRAT-ad4	Zbtb4
Cep70	4.34714e-60	0.407365	0.44	0.186	8.64994e-56	mPRAT-ad4	Cep70
Tcf7l21	6.59298e-60	0.58922	0.929	0.651	1.31187e-55	mPRAT-ad4	Tcf7l2
Lims2	6.89201e-60	0.272497	0.379	0.144	1.37137e-55	mPRAT-ad4	Lims2
Arid5b	8.72814e-60	0.567752	0.642	0.333	1.73672e-55	mPRAT-ad4	Arid5b
Mpp11	1.01324e-59	0.409815	0.466	0.202	2.01615e-55	mPRAT-ad4	Mpp1
Angptl21	1.5124e-59	0.376879	0.41	0.164	3.00937e-55	mPRAT-ad4	Angptl2
Mvb12b	2.29673e-59	0.299555	0.28	0.092	4.57003e-55	mPRAT-ad4	Mvb12b
Aoc3	2.7424e-59	0.415027	0.626	0.31	5.45682e-55	mPRAT-ad4	Aoc3
Btbd8	4.04458e-59	0.276299	0.328	0.117	8.0479e-55	mPRAT-ad4	Btbd8
Aff11	8.89411e-59	0.570135	0.766	0.457	1.76975e-54	mPRAT-ad4	Aff1
Mgat5	1.79439e-58	0.475521	0.585	0.287	3.57049e-54	mPRAT-ad4	Mgat5
Prnp1	2.18483e-58	0.280982	0.327	0.118	4.34738e-54	mPRAT-ad4	Prnp
Zfp6971	2.42118e-58	0.436602	0.49	0.221	4.81766e-54	mPRAT-ad4	Zfp697
Svil1	3.36946e-58	0.507424	0.684	0.366	6.70454e-54	mPRAT-ad4	Svil
Mapkbp1	9.74564e-58	0.333371	0.334	0.123	1.93919e-53	mPRAT-ad4	Mapkbp1
Cavin21	1.19259e-57	0.436713	0.622	0.311	2.37302e-53	mPRAT-ad4	Cavin2
Hspg21	3.84106e-57	0.405339	0.54	0.251	7.64293e-53	mPRAT-ad4	Hspg2
Mllt31	5.6525e-57	0.615249	0.551	0.275	1.12473e-52	mPRAT-ad4	Mllt3
Mpdz	6.91482e-57	0.468616	0.604	0.312	1.37591e-52	mPRAT-ad4	Mpdz
Trappc6b1	8.58159e-57	0.334495	0.571	0.268	1.70757e-52	mPRAT-ad4	Trappc6b
Ttc7	1.01327e-56	0.405862	0.345	0.131	2.01621e-52	mPRAT-ad4	Ttc7
Acvr1c1	1.01383e-56	0.56228	0.915	0.704	2.01733e-52	mPRAT-ad4	Acvr1c
Bche1	1.03974e-56	0.362348	0.396	0.16	2.06887e-52	mPRAT-ad4	Bche
Rap1gap2	1.13797e-56	0.294815	0.315	0.113	2.26434e-52	mPRAT-ad4	Rap1gap2
Gm46218	1.20432e-56	0.384516	0.358	0.139	2.39635e-52	mPRAT-ad4	Gm46218
Sparc	2.74192e-56	0.314661	0.354	0.136	5.45588e-52	mPRAT-ad4	Sparc
4930412C18Rik1	3.1515e-56	0.294645	0.405	0.164	6.27086e-52	mPRAT-ad4	4930412C18Rik
Grhl1	3.32743e-56	0.359464	0.321	0.119	6.62092e-52	mPRAT-ad4	Grhl1
Cep112	3.35632e-56	0.403434	0.292	0.103	6.6784e-52	mPRAT-ad4	Cep112
Cers5	3.4318e-56	0.330053	0.468	0.202	6.82859e-52	mPRAT-ad4	Cers5
Bcl91	3.49767e-56	0.340256	0.414	0.171	6.95966e-52	mPRAT-ad4	Bcl9
Fchsd2	4.4131e-56	0.344999	0.415	0.172	8.78119e-52	mPRAT-ad4	Fchsd2
Fmnl21	5.90043e-56	0.475046	0.658	0.341	1.17407e-51	mPRAT-ad4	Fmnl2
Fah	6.64286e-56	0.320197	0.33	0.122	1.3218e-51	mPRAT-ad4	Fah
Lrch1	1.11858e-55	0.301306	0.405	0.165	2.22575e-51	mPRAT-ad4	Lrch1
Tmem87b	4.44095e-55	0.339969	0.514	0.237	8.8366e-51	mPRAT-ad4	Tmem87b
Gnptab1	5.2583e-55	0.341255	0.511	0.233	1.0463e-50	mPRAT-ad4	Gnptab
Sqor	5.8391e-55	0.271514	0.294	0.103	1.16186e-50	mPRAT-ad4	Sqor
Prickle1	6.63263e-55	0.367628	0.424	0.179	1.31976e-50	mPRAT-ad4	Prickle1
Fign1	6.64479e-55	0.622472	0.605	0.325	1.32218e-50	mPRAT-ad4	Fign
Mitf1	7.31857e-55	0.516421	0.672	0.359	1.45625e-50	mPRAT-ad4	Mitf
Lrrfip1	8.25845e-55	0.262786	0.286	0.099	1.64327e-50	mPRAT-ad4	Lrrfip1
Srgap2	1.86648e-54	0.329936	0.423	0.179	3.71392e-50	mPRAT-ad4	Srgap2
Hace1	3.56459e-54	0.276373	0.385	0.154	7.09281e-50	mPRAT-ad4	Hace1
Bbx	5.58269e-54	0.408837	0.592	0.294	1.11084e-49	mPRAT-ad4	Bbx
A530020G20Rik1	5.98504e-54	0.381043	0.658	0.335	1.1909e-49	mPRAT-ad4	A530020G20Rik
Hs2st1	8.17046e-54	0.461098	0.61	0.312	1.62576e-49	mPRAT-ad4	Hs2st1
Cep85l1	9.03923e-54	0.357936	0.625	0.316	1.79863e-49	mPRAT-ad4	Cep85l
Tdrp	1.04686e-53	0.25201	0.262	0.087	2.08304e-49	mPRAT-ad4	Tdrp
Rps6ka31	1.11861e-53	0.643892	0.735	0.454	2.22582e-49	mPRAT-ad4	Rps6ka3
Ttc8	1.33256e-53	0.285226	0.319	0.119	2.65154e-49	mPRAT-ad4	Ttc8
Fhit1	1.68589e-53	0.561994	0.884	0.662	3.35458e-49	mPRAT-ad4	Fhit
Slc43a1	2.04439e-53	0.351417	0.281	0.099	4.06792e-49	mPRAT-ad4	Slc43a1
Pygb1	3.18595e-53	0.460326	0.589	0.294	6.3394e-49	mPRAT-ad4	Pygb
Phkg1	4.35391e-53	0.335443	0.29	0.104	8.66341e-49	mPRAT-ad4	Phkg1
Gulp11	4.40597e-53	0.571098	0.609	0.319	8.76699e-49	mPRAT-ad4	Gulp1
Ttc28	4.48566e-53	0.469724	0.779	0.482	8.92557e-49	mPRAT-ad4	Ttc28
Pard3b1	5.88103e-53	0.494322	0.811	0.505	1.17021e-48	mPRAT-ad4	Pard3b
Zfp9501	6.31087e-53	0.34228	0.522	0.244	1.25574e-48	mPRAT-ad4	Zfp950
Vrk2	6.65577e-53	0.280594	0.392	0.161	1.32436e-48	mPRAT-ad4	Vrk2
Ube2e21	7.24314e-53	0.534713	0.916	0.697	1.44124e-48	mPRAT-ad4	Ube2e2
Ahnak1	1.20584e-52	0.489518	0.819	0.487	2.39938e-48	mPRAT-ad4	Ahnak
Sash1	1.72674e-52	0.286283	0.402	0.167	3.43587e-48	mPRAT-ad4	Sash1
Acadsb1	2.71518e-52	0.286355	0.532	0.247	5.40266e-48	mPRAT-ad4	Acadsb
Phf8	2.92789e-52	0.454755	0.57	0.289	5.82592e-48	mPRAT-ad4	Phf8
Trps11	2.99682e-52	0.587836	0.836	0.591	5.96308e-48	mPRAT-ad4	Trps1
Slc22a3	3.01113e-52	0.473327	0.683	0.377	5.99154e-48	mPRAT-ad4	Slc22a3
Prkca	6.3625e-52	0.461288	0.603	0.314	1.26601e-47	mPRAT-ad4	Prkca
Stard131	6.76405e-52	0.622472	0.823	0.583	1.34591e-47	mPRAT-ad4	Stard13
1110019D14Rik1	7.27902e-52	0.396939	0.536	0.259	1.44838e-47	mPRAT-ad4	1110019D14Rik
Pten1	9.73398e-52	0.529663	0.851	0.592	1.93687e-47	mPRAT-ad4	Pten
Rai2	1.44645e-51	0.338089	0.283	0.101	2.87815e-47	mPRAT-ad4	Rai2
Tomm34	1.48765e-51	0.282835	0.331	0.127	2.96012e-47	mPRAT-ad4	Tomm34
Prkd11	1.62675e-51	0.568569	0.851	0.587	3.23692e-47	mPRAT-ad4	Prkd1
Plekha51	1.63762e-51	0.416118	0.481	0.226	3.25854e-47	mPRAT-ad4	Plekha5
Lmo41	2.66355e-51	0.277043	0.39	0.162	5.29993e-47	mPRAT-ad4	Lmo4
Mgst11	3.06931e-51	0.382229	0.627	0.322	6.10732e-47	mPRAT-ad4	Mgst1
Blcap1	5.22823e-51	0.401576	0.704	0.386	1.04031e-46	mPRAT-ad4	Blcap
Esyt1	5.38968e-51	0.272897	0.357	0.144	1.07244e-46	mPRAT-ad4	Esyt1
Asah2	5.4266e-51	0.270239	0.317	0.12	1.07978e-46	mPRAT-ad4	Asah2
Lnx21	6.0264e-51	0.260973	0.438	0.192	1.19913e-46	mPRAT-ad4	Lnx2
Ndfip1	2.77529e-50	0.342024	0.476	0.22	5.52227e-46	mPRAT-ad4	Ndfip1
Myo9a1	2.78002e-50	0.364213	0.588	0.299	5.53168e-46	mPRAT-ad4	Myo9a
Myl1	2.80104e-50	0.549225	0.661	0.39	5.5735e-46	mPRAT-ad4	Myl1
Zbtb5	3.41235e-50	0.288639	0.378	0.157	6.7899e-46	mPRAT-ad4	Zbtb5
Mdfic	4.0612e-50	0.332589	0.411	0.18	8.08097e-46	mPRAT-ad4	Mdfic
B430010I23Rik1	1.1023e-49	0.426003	0.423	0.192	2.19335e-45	mPRAT-ad4	B430010I23Rik
L3mbtl3	1.26854e-49	0.36236	0.485	0.227	2.52414e-45	mPRAT-ad4	L3mbtl3
Nln	1.59628e-49	0.284019	0.413	0.18	3.17629e-45	mPRAT-ad4	Nln
B3galt21	1.63887e-49	0.440585	0.554	0.279	3.26102e-45	mPRAT-ad4	B3galt2
Zfp934	2.14917e-49	0.279845	0.288	0.105	4.27642e-45	mPRAT-ad4	Zfp934
Pcbp3	2.16638e-49	0.27571	0.271	0.097	4.31066e-45	mPRAT-ad4	Pcbp3
Ces1f1	2.76353e-49	0.355368	0.48	0.224	5.49887e-45	mPRAT-ad4	Ces1f
Cdyl21	2.9138e-49	0.325467	0.451	0.203	5.79788e-45	mPRAT-ad4	Cdyl2
Zbtb37	3.02649e-49	0.284563	0.328	0.129	6.02212e-45	mPRAT-ad4	Zbtb37
Parp9	3.08602e-49	0.263442	0.367	0.151	6.14057e-45	mPRAT-ad4	Parp9
Akap7	6.08115e-49	0.498539	0.819	0.523	1.21003e-44	mPRAT-ad4	Akap7
Cep1281	6.25724e-49	0.437615	0.397	0.176	1.24507e-44	mPRAT-ad4	Cep128
Adipoq1	9.57887e-49	0.39702	0.67	0.367	1.906e-44	mPRAT-ad4	Adipoq
Leng8	1.03778e-48	0.278639	0.46	0.209	2.06497e-44	mPRAT-ad4	Leng8
Chchd61	1.06859e-48	0.342413	0.646	0.346	2.12627e-44	mPRAT-ad4	Chchd6
Stim2	1.85406e-48	0.364273	0.411	0.184	3.6892e-44	mPRAT-ad4	Stim2
Pdzd21	1.95964e-48	0.482993	0.895	0.632	3.89928e-44	mPRAT-ad4	Pdzd2
Pkd2	2.02923e-48	0.259542	0.431	0.19	4.03777e-44	mPRAT-ad4	Pkd2
Ralgps1	2.64721e-48	0.306034	0.423	0.188	5.26741e-44	mPRAT-ad4	Ralgps1
Scmh1	5.71458e-48	0.351023	0.523	0.258	1.13709e-43	mPRAT-ad4	Scmh1
Abcc5	9.54894e-48	0.333302	0.553	0.276	1.90005e-43	mPRAT-ad4	Abcc5
Cyb5a1	1.18063e-47	0.374214	0.645	0.343	2.34923e-43	mPRAT-ad4	Cyb5a
Xkr6	1.26361e-47	0.306818	0.32	0.126	2.51433e-43	mPRAT-ad4	Xkr6
Mycbp21	1.63972e-47	0.588386	0.862	0.657	3.26271e-43	mPRAT-ad4	Mycbp2
Pabpn1	2.27387e-47	0.49962	0.871	0.548	4.52455e-43	mPRAT-ad4	Pabpn1
Ano101	2.2901e-47	0.296068	0.509	0.245	4.55685e-43	mPRAT-ad4	Ano10
Slc27a11	2.31022e-47	0.605505	0.925	0.687	4.59688e-43	mPRAT-ad4	Slc27a1
6030443J06Rik	2.55548e-47	0.367533	0.474	0.227	5.08489e-43	mPRAT-ad4	6030443J06Rik
Rsu1	2.82315e-47	0.440623	0.586	0.318	5.6175e-43	mPRAT-ad4	Rsu1
St13	4.4796e-47	0.367835	0.608	0.321	8.91351e-43	mPRAT-ad4	St13
Stx16	1.08298e-46	0.353005	0.573	0.299	2.15491e-42	mPRAT-ad4	Stx16
Sesn1	1.13739e-46	0.311956	0.455	0.212	2.26317e-42	mPRAT-ad4	Sesn1
Maged1	1.16266e-46	0.254366	0.27	0.099	2.31346e-42	mPRAT-ad4	Maged1
Invs	1.48005e-46	0.264933	0.282	0.106	2.94501e-42	mPRAT-ad4	Invs
Mocs11	1.53269e-46	0.263966	0.394	0.171	3.04974e-42	mPRAT-ad4	Mocs1
Fzd4	3.16325e-46	0.317382	0.536	0.268	6.29424e-42	mPRAT-ad4	Fzd4
Ddx51	3.98e-46	0.44774	0.859	0.573	7.9194e-42	mPRAT-ad4	Ddx5
Zc3h7a	5.9678e-46	0.323113	0.549	0.277	1.18747e-41	mPRAT-ad4	Zc3h7a
Rab3gap21	8.9288e-46	0.338721	0.523	0.265	1.77665e-41	mPRAT-ad4	Rab3gap2
Map4	1.32358e-45	0.294518	0.456	0.215	2.63367e-41	mPRAT-ad4	Map4
Bahcc1	1.54935e-45	0.277754	0.327	0.134	3.08289e-41	mPRAT-ad4	Bahcc1
Bag41	1.85068e-45	0.280695	0.414	0.189	3.68248e-41	mPRAT-ad4	Bag4
Gm166851	1.92792e-45	0.354361	0.392	0.174	3.83618e-41	mPRAT-ad4	Gm16685
9530026P05Rik1	2.00827e-45	0.592248	0.853	0.675	3.99605e-41	mPRAT-ad4	9530026P05Rik
Mccc21	2.22049e-45	0.301368	0.59	0.304	4.41833e-41	mPRAT-ad4	Mccc2
Tnrc18	2.73506e-45	0.268295	0.478	0.227	5.44222e-41	mPRAT-ad4	Tnrc18
Plce11	4.89193e-45	0.392591	0.605	0.322	9.73396e-41	mPRAT-ad4	Plce1
Cpeb21	6.04041e-45	0.383546	0.419	0.196	1.20192e-40	mPRAT-ad4	Cpeb2
Ypel51	6.93011e-45	0.294985	0.458	0.217	1.37895e-40	mPRAT-ad4	Ypel5
Asap1	9.88376e-45	0.457194	0.736	0.457	1.96667e-40	mPRAT-ad4	Asap1
Srsf1	1.02759e-44	0.276068	0.581	0.295	2.0447e-40	mPRAT-ad4	Srsf1
Ercc6l2	1.06845e-44	0.280227	0.396	0.177	2.126e-40	mPRAT-ad4	Ercc6l2
Plaat31	1.68807e-44	0.411812	0.7	0.405	3.35893e-40	mPRAT-ad4	Plaat3
Zbtb38	2.57158e-44	0.4237	0.597	0.327	5.11694e-40	mPRAT-ad4	Zbtb38
Upp21	3.8295e-44	0.349205	0.577	0.302	7.61994e-40	mPRAT-ad4	Upp2
Pik3ca	4.87813e-44	0.310488	0.587	0.311	9.70649e-40	mPRAT-ad4	Pik3ca
Steap41	7.82108e-44	0.279013	0.359	0.154	1.55624e-39	mPRAT-ad4	Steap4
Sfxn11	1.2123e-43	0.348013	0.67	0.365	2.41223e-39	mPRAT-ad4	Sfxn1
Extl31	2.24216e-43	0.347814	0.645	0.356	4.46145e-39	mPRAT-ad4	Extl3
Rora	3.06186e-43	0.403948	0.973	0.89	6.0925e-39	mPRAT-ad4	Rora
Map3k3	3.54586e-43	0.264297	0.556	0.282	7.05554e-39	mPRAT-ad4	Map3k3
Tns21	5.43117e-43	0.250886	0.462	0.217	1.08069e-38	mPRAT-ad4	Tns2
Atg7	7.17306e-43	0.358901	0.578	0.307	1.4273e-38	mPRAT-ad4	Atg7
Lamc1	8.64528e-43	0.490104	0.72	0.439	1.72024e-38	mPRAT-ad4	Lamc1
Fgfr11	1.15101e-42	0.37053	0.655	0.368	2.29027e-38	mPRAT-ad4	Fgfr1
Kif13a	1.62424e-42	0.378929	0.656	0.369	3.23192e-38	mPRAT-ad4	Kif13a
Hlcs1	1.77498e-42	0.290231	0.419	0.196	3.53186e-38	mPRAT-ad4	Hlcs
Gnaq1	1.81697e-42	0.468128	0.865	0.627	3.6154e-38	mPRAT-ad4	Gnaq
Lrig3	1.83286e-42	0.269811	0.317	0.132	3.64703e-38	mPRAT-ad4	Lrig3
Mir100hg	3.61457e-42	0.512974	0.777	0.527	7.19227e-38	mPRAT-ad4	Mir100hg
Irf21	5.11313e-42	0.351679	0.728	0.417	1.01741e-37	mPRAT-ad4	Irf2
St3gal1	5.49479e-42	0.342083	0.304	0.125	1.09335e-37	mPRAT-ad4	St3gal1
Syde21	5.91281e-42	0.289382	0.441	0.21	1.17653e-37	mPRAT-ad4	Syde2
Sort11	6.00261e-42	0.373079	0.676	0.389	1.1944e-37	mPRAT-ad4	Sort1
Rhobtb11	6.13811e-42	0.369464	0.548	0.287	1.22136e-37	mPRAT-ad4	Rhobtb1
Prr5l1	6.39097e-42	0.276202	0.303	0.124	1.27167e-37	mPRAT-ad4	Prr5l
Selenbp1	7.58037e-42	0.261357	0.257	0.097	1.50834e-37	mPRAT-ad4	Selenbp1
Syne11	8.64796e-42	0.410894	0.679	0.395	1.72077e-37	mPRAT-ad4	Syne1
Dhtkd11	1.02163e-41	0.251343	0.397	0.179	2.03283e-37	mPRAT-ad4	Dhtkd1
Sox6	1.39853e-41	0.444718	0.931	0.763	2.7828e-37	mPRAT-ad4	Sox6
Wwtr1	1.72811e-41	0.443172	0.631	0.366	3.4386e-37	mPRAT-ad4	Wwtr1
Rxra1	3.90553e-41	0.279808	0.437	0.207	7.77122e-37	mPRAT-ad4	Rxra
Hmces	1.06992e-40	0.258718	0.306	0.128	2.12893e-36	mPRAT-ad4	Hmces
Palld	1.1364e-40	0.257711	0.373	0.171	2.26122e-36	mPRAT-ad4	Palld
Arhgap29	1.51125e-40	0.408272	0.697	0.419	3.00708e-36	mPRAT-ad4	Arhgap29
Kif13b1	1.74069e-40	0.31445	0.659	0.368	3.46363e-36	mPRAT-ad4	Kif13b
Kcnq1ot1	4.36529e-40	0.453566	0.736	0.463	8.68606e-36	mPRAT-ad4	Kcnq1ot1
Nek7	5.40453e-40	0.298243	0.58	0.313	1.07539e-35	mPRAT-ad4	Nek7
Cpeb41	6.1986e-40	0.423711	0.75	0.479	1.2334e-35	mPRAT-ad4	Cpeb4
Sgms1	9.0415e-40	0.42128	0.735	0.464	1.79908e-35	mPRAT-ad4	Sgms1
Cfd1	9.62856e-40	0.273429	0.629	0.343	1.91589e-35	mPRAT-ad4	Cfd
Esr11	1.79436e-39	0.504327	0.744	0.464	3.57041e-35	mPRAT-ad4	Esr1
Map3k20	1.80837e-39	0.263362	0.537	0.283	3.5983e-35	mPRAT-ad4	Map3k20
Syne31	3.58689e-39	0.358909	0.412	0.198	7.1372e-35	mPRAT-ad4	Syne3
Slc16a71	9.12973e-39	0.312778	0.593	0.326	1.81663e-34	mPRAT-ad4	Slc16a7
Sybu1	1.67914e-38	0.255949	0.408	0.195	3.34116e-34	mPRAT-ad4	Sybu
Uvrag	2.44756e-38	0.291984	0.61	0.347	4.87016e-34	mPRAT-ad4	Uvrag
Zfp4231	3.51136e-38	0.395241	0.858	0.587	6.98691e-34	mPRAT-ad4	Zfp423
Acvr11	5.5465e-38	0.27582	0.597	0.323	1.10364e-33	mPRAT-ad4	Acvr1
9330111N05Rik	8.26619e-38	0.329273	0.305	0.132	1.64481e-33	mPRAT-ad4	9330111N05Rik
Rnf2171	1.2835e-37	0.264271	0.515	0.268	2.5539e-33	mPRAT-ad4	Rnf217
Neo11	1.52098e-37	0.262345	0.505	0.261	3.02645e-33	mPRAT-ad4	Neo1
Tmcc31	1.53369e-37	0.404956	0.722	0.44	3.05175e-33	mPRAT-ad4	Tmcc3
Wwc2	1.97472e-37	0.345061	0.758	0.48	3.92931e-33	mPRAT-ad4	Wwc2
Ak21	2.30008e-37	0.44389	0.813	0.513	4.57669e-33	mPRAT-ad4	Ak2
Reep51	3.48935e-37	0.276991	0.509	0.268	6.94312e-33	mPRAT-ad4	Reep5
Gm128111	3.99819e-37	0.380436	0.319	0.143	7.95561e-33	mPRAT-ad4	Gm12811
Rasal2	6.50472e-37	0.296206	0.377	0.18	1.29431e-32	mPRAT-ad4	Rasal2
Eps15	7.33866e-37	0.258749	0.54	0.293	1.46025e-32	mPRAT-ad4	Eps15
Ppp1r9a	8.44041e-37	0.401093	0.837	0.596	1.67947e-32	mPRAT-ad4	Ppp1r9a
Gmds1	1.40324e-36	0.30771	0.377	0.179	2.79216e-32	mPRAT-ad4	Gmds
Meis1	8.38603e-36	0.316373	0.571	0.32	1.66865e-31	mPRAT-ad4	Meis1
Tead11	9.30541e-36	0.354202	0.82	0.555	1.85159e-31	mPRAT-ad4	Tead1
Ulk2	1.6005e-35	0.287981	0.622	0.355	3.18467e-31	mPRAT-ad4	Ulk2
Rgcc	2.26358e-35	0.418163	0.778	0.523	4.50406e-31	mPRAT-ad4	Rgcc
Pi4kb	2.81899e-35	0.260491	0.458	0.237	5.60923e-31	mPRAT-ad4	Pi4kb
Rasd1	5.05381e-35	0.26275	0.317	0.144	1.00561e-30	mPRAT-ad4	Rasd1
Dennd1a	5.62935e-35	0.375476	0.853	0.645	1.12013e-30	mPRAT-ad4	Dennd1a
Thada	1.33073e-34	0.257456	0.612	0.345	2.64788e-30	mPRAT-ad4	Thada
Mcph11	1.51273e-34	0.274253	0.552	0.303	3.01004e-30	mPRAT-ad4	Mcph1
Tpk1	2.07821e-34	0.270306	0.479	0.249	4.13522e-30	mPRAT-ad4	Tpk1
Lrrc581	2.15648e-34	0.316351	0.676	0.407	4.29096e-30	mPRAT-ad4	Lrrc58
Wls1	2.30125e-34	0.311529	0.603	0.352	4.57902e-30	mPRAT-ad4	Wls
Tcf7l11	2.89369e-34	0.343671	0.484	0.261	5.75786e-30	mPRAT-ad4	Tcf7l1
Pikfyve1	2.93664e-34	0.297851	0.726	0.437	5.84333e-30	mPRAT-ad4	Pikfyve
Gm35552	3.80793e-34	0.385635	0.605	0.37	7.57701e-30	mPRAT-ad4	Gm35552
Snrnp70	3.86582e-34	0.335489	0.805	0.532	7.69221e-30	mPRAT-ad4	Snrnp70
Lpp	4.4667e-34	0.396892	0.873	0.673	8.88784e-30	mPRAT-ad4	Lpp
Phc31	6.97778e-34	0.25689	0.593	0.336	1.38844e-29	mPRAT-ad4	Phc3
Gm330371	2.1289e-33	0.293862	0.389	0.194	4.23608e-29	mPRAT-ad4	Gm33037
Atp6v0a1	2.30968e-33	0.339659	0.576	0.339	4.5958e-29	mPRAT-ad4	Atp6v0a1
Afap11	3.03063e-33	0.301384	0.751	0.465	6.03034e-29	mPRAT-ad4	Afap1
Zfand31	4.07206e-33	0.412752	0.878	0.715	8.10259e-29	mPRAT-ad4	Zfand3
Sptbn1	4.42028e-33	0.455229	0.875	0.714	8.79547e-29	mPRAT-ad4	Sptbn1
Phip1	5.48518e-33	0.289933	0.621	0.357	1.09144e-28	mPRAT-ad4	Phip
Zyg11a1	7.08294e-33	0.255398	0.3	0.137	1.40936e-28	mPRAT-ad4	Zyg11a
Adgrg21	9.65567e-33	0.251455	0.322	0.151	1.92129e-28	mPRAT-ad4	Adgrg2
Lyst1	2.03468e-32	0.28281	0.694	0.418	4.0486e-28	mPRAT-ad4	Lyst
Pcx1	2.67419e-32	0.385516	0.96	0.81	5.32111e-28	mPRAT-ad4	Pcx
A530053G22Rik	8.62584e-32	0.502313	0.841	0.682	1.71637e-27	mPRAT-ad4	A530053G22Rik
Gm30173	1.2703e-31	0.330378	0.306	0.143	2.52764e-27	mPRAT-ad4	Gm30173
Epb41l11	1.72219e-31	0.288387	0.763	0.471	3.42682e-27	mPRAT-ad4	Epb41l1
Lgr4	1.96018e-31	0.256962	0.596	0.347	3.90037e-27	mPRAT-ad4	Lgr4
Fer	2.02113e-31	0.254296	0.637	0.375	4.02164e-27	mPRAT-ad4	Fer
Atxn7l11	2.98107e-31	0.375782	0.83	0.591	5.93174e-27	mPRAT-ad4	Atxn7l1
Mat2a1	3.31228e-31	0.254982	0.614	0.358	6.59078e-27	mPRAT-ad4	Mat2a
Cav1	7.68317e-31	0.455425	0.837	0.651	1.5288e-26	mPRAT-ad4	Cav1
Phka21	2.10225e-30	0.283784	0.695	0.429	4.18305e-26	mPRAT-ad4	Phka2
Tcf4	2.30536e-30	0.332879	0.711	0.456	4.5872e-26	mPRAT-ad4	Tcf4
Aox1	3.07631e-30	0.290053	0.813	0.543	6.12123e-26	mPRAT-ad4	Aox1
Fbxl17	3.15419e-30	0.338777	0.91	0.744	6.27621e-26	mPRAT-ad4	Fbxl17
Adhfe11	4.48161e-30	0.255645	0.747	0.471	8.9175e-26	mPRAT-ad4	Adhfe1
Kat2b1	4.66668e-30	0.272107	0.779	0.501	9.28576e-26	mPRAT-ad4	Kat2b
Nedd41	5.01888e-30	0.295995	0.975	0.856	9.98657e-26	mPRAT-ad4	Nedd4
Cobll1	9.72586e-30	0.300353	0.696	0.44	1.93525e-25	mPRAT-ad4	Cobll1
Large1	1.24868e-29	0.395981	0.753	0.536	2.48462e-25	mPRAT-ad4	Large1
Bmpr1a1	2.35353e-29	0.317713	0.717	0.466	4.68306e-25	mPRAT-ad4	Bmpr1a
Ddx17	3.4317e-29	0.321972	0.927	0.73	6.8284e-25	mPRAT-ad4	Ddx17
Prkn	3.5424e-29	0.303123	0.96	0.86	7.04867e-25	mPRAT-ad4	Prkn
Pde1a1	5.3406e-29	0.333985	0.693	0.442	1.06267e-24	mPRAT-ad4	Pde1a
Acap21	7.06506e-29	0.250805	0.601	0.359	1.40581e-24	mPRAT-ad4	Acap2
Gm161681	1.52014e-28	0.404852	0.853	0.641	3.02477e-24	mPRAT-ad4	Gm16168
Nisch	2.7228e-28	0.265425	0.732	0.463	5.41783e-24	mPRAT-ad4	Nisch
Macrod2	3.08178e-28	0.418635	0.548	0.331	6.13213e-24	mPRAT-ad4	Macrod2
Negr11	6.21746e-28	0.351929	0.974	0.88	1.23715e-23	mPRAT-ad4	Negr1
Ahcyl2	1.4353e-27	0.352512	0.772	0.529	2.85596e-23	mPRAT-ad4	Ahcyl2
Tle11	1.90017e-27	0.252977	0.48	0.27	3.78095e-23	mPRAT-ad4	Tle1
Cped1	4.36281e-27	0.334212	0.902	0.759	8.68113e-23	mPRAT-ad4	Cped1
Peak1	5.1711e-27	0.271374	0.532	0.313	1.02894e-22	mPRAT-ad4	Peak1
Fggy	6.53415e-27	0.318605	0.718	0.49	1.30017e-22	mPRAT-ad4	Fggy
Gtdc1	7.63063e-27	0.272238	0.314	0.158	1.51834e-22	mPRAT-ad4	Gtdc1
Vps13c	1.53148e-26	0.269911	0.772	0.505	3.04734e-22	mPRAT-ad4	Vps13c
Acss31	6.94666e-26	0.297947	0.924	0.753	1.38225e-21	mPRAT-ad4	Acss3
Dock1	1.17545e-25	0.265306	0.717	0.467	2.33892e-21	mPRAT-ad4	Dock1
Pid11	2.08374e-25	0.31471	0.659	0.426	4.14622e-21	mPRAT-ad4	Pid1
Rnf144a1	2.40218e-25	0.280215	0.536	0.318	4.77986e-21	mPRAT-ad4	Rnf144a
Tmem120b1	4.40529e-25	0.310006	0.916	0.703	8.76566e-21	mPRAT-ad4	Tmem120b
2023-03-31	5.38162e-25	0.256071	0.821	0.595	1.07083e-20	mPRAT-ad4	2023-03-03
Celf21	5.82431e-25	0.284818	0.973	0.918	1.15892e-20	mPRAT-ad4	Celf2
Pfkfb11	5.95472e-25	0.280395	0.81	0.564	1.18487e-20	mPRAT-ad4	Pfkfb1
Oxct1	6.70352e-25	0.28223	0.588	0.36	1.33387e-20	mPRAT-ad4	Oxct1
Irs11	8.64373e-25	0.259166	0.815	0.557	1.71993e-20	mPRAT-ad4	Irs1
Galnt2	1.43262e-24	0.268917	0.708	0.466	2.85064e-20	mPRAT-ad4	Galnt2
Cdo1	2.86205e-24	0.343842	0.751	0.525	5.6949e-20	mPRAT-ad4	Cdo1
Ccdc3	6.32983e-24	0.342517	0.358	0.199	1.25951e-19	mPRAT-ad4	Ccdc3
Gpc41	2.91075e-23	0.255362	0.383	0.213	5.7918e-19	mPRAT-ad4	Gpc4
Ebf1	3.76837e-23	0.313844	0.982	0.947	7.4983e-19	mPRAT-ad4	Ebf1
Tbl1x1	8.7137e-23	0.262008	0.754	0.512	1.73385e-18	mPRAT-ad4	Tbl1x
AC149090.1	1.75753e-22	0.461772	0.78	0.532	3.49713e-18	mPRAT-ad4	AC149090.1
Mical3	2.53973e-22	0.255865	0.931	0.79	5.05356e-18	mPRAT-ad4	Mical3
Enpp21	3.14674e-22	0.287295	0.68	0.45	6.26138e-18	mPRAT-ad4	Enpp2
Baz2b	1.10316e-21	0.283471	0.867	0.68	2.19507e-17	mPRAT-ad4	Baz2b
Med12l	1.15277e-21	0.259827	0.661	0.443	2.29377e-17	mPRAT-ad4	Med12l
Lama41	1.74174e-21	0.265283	0.91	0.745	3.46571e-17	mPRAT-ad4	Lama4
Atxn11	3.3062e-21	0.262379	0.948	0.815	6.57868e-17	mPRAT-ad4	Atxn1
Msrb31	8.14453e-21	0.302169	0.8	0.601	1.6206e-16	mPRAT-ad4	Msrb3
Slc1a31	2.64045e-20	0.298057	0.97	0.845	5.25397e-16	mPRAT-ad4	Slc1a3
Trarg11	1.5539e-19	0.258417	0.737	0.514	3.09196e-15	mPRAT-ad4	Trarg1
Clk1	1.58617e-19	0.257578	0.859	0.624	3.15617e-15	mPRAT-ad4	Clk1
Camk2d1	3.76311e-19	0.256895	0.876	0.694	7.48783e-15	mPRAT-ad4	Camk2d
Tsc22d2	1.73751e-18	0.332099	0.62	0.416	3.45729e-14	mPRAT-ad4	Tsc22d2
Dlg21	1.81284e-18	0.273744	0.509	0.329	3.60718e-14	mPRAT-ad4	Dlg2
Gpam	5.99371e-18	0.315165	0.743	0.522	1.19263e-13	mPRAT-ad4	Gpam
Ctcflos1	3.49383e-17	0.286392	0.895	0.731	6.95203e-13	mPRAT-ad4	Ctcflos
Dok6	3.83513e-17	0.281759	0.303	0.176	7.63113e-13	mPRAT-ad4	Dok6
St6galnac51	2.17475e-11	0.305822	0.274	0.177	4.32731e-07	mPRAT-ad4	St6galnac5

## Sheet: mPRAT-ASPC
	p_val	avg_log2FC	pct.1	pct.2	p_val_adj	cluster	gene
Zfpm2	1.4521e-39	1.18061	0.935	0.832	2.95561e-35	mPRAT-aspc1	Zfpm2
Pla1a	2.20251e-36	1.62761	0.467	0.06	4.48299e-32	mPRAT-aspc1	Pla1a
Adgrd1	2.87492e-36	1.70859	0.682	0.241	5.85161e-32	mPRAT-aspc1	Adgrd1
Nova1	3.28807e-35	1.55103	0.854	0.556	6.69254e-31	mPRAT-aspc1	Nova1
Ebf2	3.66035e-33	1.22644	0.932	0.786	7.45028e-29	mPRAT-aspc1	Ebf2
Sox5	2.40687e-32	1.24055	0.875	0.621	4.89895e-28	mPRAT-aspc1	Sox5
Dpp4	1.59415e-31	2.06927	0.449	0.076	3.24474e-27	mPRAT-aspc1	Dpp4
Plce1	4.88942e-31	1.4838	0.723	0.336	9.95193e-27	mPRAT-aspc1	Plce1
Ddr2	2.10504e-30	1.14153	0.911	0.664	4.28459e-26	mPRAT-aspc1	Ddr2
Fyn	7.12802e-30	1.55339	0.676	0.322	1.45084e-25	mPRAT-aspc1	Fyn
Ust	9.00492e-28	1.20421	0.845	0.615	1.83286e-23	mPRAT-aspc1	Ust
Fap	5.47699e-27	1.3787	0.711	0.341	1.11479e-22	mPRAT-aspc1	Fap
Arhgap20	8.6002e-27	1.43222	0.521	0.157	1.75048e-22	mPRAT-aspc1	Arhgap20
Creb5	5.77886e-25	1.68049	0.765	0.531	1.17623e-20	mPRAT-aspc1	Creb5
Plxdc2	1.22312e-24	0.89873	0.958	0.821	2.48953e-20	mPRAT-aspc1	Plxdc2
Dock11	1.29489e-23	1.32933	0.506	0.165	2.63562e-19	mPRAT-aspc1	Dock11
Robo1	1.11458e-22	1.79021	0.426	0.106	2.26861e-18	mPRAT-aspc1	Robo1
Man1a	1.27995e-22	1.02549	0.792	0.485	2.6052e-18	mPRAT-aspc1	Man1a
C1qtnf7	2.55088e-22	1.3854	0.324	0.043	5.19206e-18	mPRAT-aspc1	C1qtnf7
Coro2b	6.55747e-22	1.13811	0.449	0.133	1.33471e-17	mPRAT-aspc1	Coro2b
Srgap1	6.81563e-22	1.44291	0.655	0.355	1.38725e-17	mPRAT-aspc1	Srgap1
Wt1	4.9543e-21	1.12338	0.274	0.024	1.0084e-16	mPRAT-aspc1	Wt1
Adamts5	8.99133e-21	1.09056	0.729	0.425	1.83009e-16	mPRAT-aspc1	Adamts5
Efna5	1.83206e-20	1.27488	0.613	0.276	3.72898e-16	mPRAT-aspc1	Efna5
Ppp2r2b	7.98195e-20	2.02675	0.286	0.041	1.62465e-15	mPRAT-aspc1	Ppp2r2b
Arhgap10	2.35122e-18	0.810896	0.818	0.596	4.78567e-14	mPRAT-aspc1	Arhgap10
Adam33	3.30075e-18	1.04392	0.39	0.111	6.71834e-14	mPRAT-aspc1	Adam33
Opcml	6.25834e-18	2.11218	0.429	0.16	1.27382e-13	mPRAT-aspc1	Opcml
Fbn1	6.49467e-18	1.19106	0.771	0.564	1.32193e-13	mPRAT-aspc1	Fbn1
Slc9a9	1.03631e-17	1.23483	0.366	0.106	2.1093e-13	mPRAT-aspc1	Slc9a9
Gm46323	1.95256e-17	1.11152	0.277	0.046	3.97424e-13	mPRAT-aspc1	Gm46323
Fn1	2.65932e-17	1.32525	0.345	0.092	5.41278e-13	mPRAT-aspc1	Fn1
Anxa3	1.88674e-16	1.39437	0.384	0.13	3.84026e-12	mPRAT-aspc1	Anxa3
Foxp1	3.2602e-16	0.684352	0.893	0.756	6.63581e-12	mPRAT-aspc1	Foxp1
Smpd3	8.45195e-16	1.45733	0.342	0.103	1.72031e-11	mPRAT-aspc1	Smpd3
Pbx1	9.16024e-16	0.604156	0.938	0.851	1.86447e-11	mPRAT-aspc1	Pbx1
Col5a2	1.01996e-15	0.8881	0.762	0.556	2.07603e-11	mPRAT-aspc1	Col5a2
Pde10a	1.04511e-15	1.03019	0.36	0.111	2.12721e-11	mPRAT-aspc1	Pde10a
Plpp3	1.36915e-15	0.971336	0.875	0.767	2.78676e-11	mPRAT-aspc1	Plpp3
Zfp521	1.55945e-15	0.80677	0.801	0.623	3.1741e-11	mPRAT-aspc1	Zfp521
Lamc1	1.71757e-15	0.818094	0.863	0.691	3.49595e-11	mPRAT-aspc1	Lamc1
Zeb1	2.89323e-15	0.684889	0.955	0.878	5.88887e-11	mPRAT-aspc1	Zeb1
Zfhx4	3.94411e-15	1.4426	0.33	0.103	8.02785e-11	mPRAT-aspc1	Zfhx4
Cd34	5.24115e-15	1.01388	0.381	0.138	1.06678e-10	mPRAT-aspc1	Cd34
Grb10	9.45294e-15	0.990695	0.682	0.472	1.92405e-10	mPRAT-aspc1	Grb10
Ifi204	1.11602e-14	0.904939	0.509	0.247	2.27155e-10	mPRAT-aspc1	Ifi204
Cdon	1.16815e-14	1.1572	0.545	0.306	2.37766e-10	mPRAT-aspc1	Cdon
Lurap1l	1.23029e-14	1.29291	0.324	0.103	2.50414e-10	mPRAT-aspc1	Lurap1l
Add3	1.56596e-14	0.726271	0.81	0.631	3.18736e-10	mPRAT-aspc1	Add3
Tmtc2	1.83862e-14	1.45178	0.28	0.068	3.74232e-10	mPRAT-aspc1	Tmtc2
Pi16	3.34607e-14	1.42622	0.36	0.125	6.81058e-10	mPRAT-aspc1	Pi16
Antxr1	3.8842e-14	0.845474	0.765	0.539	7.90591e-10	mPRAT-aspc1	Antxr1
Nhsl1	4.30224e-14	1.03134	0.417	0.173	8.75679e-10	mPRAT-aspc1	Nhsl1
Tbc1d4	4.381e-14	1.08739	0.551	0.32	8.91708e-10	mPRAT-aspc1	Tbc1d4
Agap1	4.71678e-14	0.922393	0.661	0.436	9.60053e-10	mPRAT-aspc1	Agap1
Lvrn	5.09687e-14	0.865791	0.613	0.355	1.03742e-09	mPRAT-aspc1	Lvrn
Sema3c	9.23646e-14	1.79196	0.473	0.247	1.87999e-09	mPRAT-aspc1	Sema3c
Mcu	9.39177e-14	0.923897	0.667	0.428	1.9116e-09	mPRAT-aspc1	Mcu
Wipf1	1.07004e-13	0.777012	0.702	0.458	2.17796e-09	mPRAT-aspc1	Wipf1
Morrbid	1.28001e-13	1.0068	0.256	0.057	2.60532e-09	mPRAT-aspc1	Morrbid
Galnt16	1.42036e-13	0.981244	0.339	0.114	2.891e-09	mPRAT-aspc1	Galnt16
Vgll3	1.57339e-13	0.995685	0.414	0.173	3.20247e-09	mPRAT-aspc1	Vgll3
Adam23	2.09435e-13	0.774831	0.497	0.22	4.26283e-09	mPRAT-aspc1	Adam23
Limch1	3.02444e-13	1.77254	0.321	0.117	6.15595e-09	mPRAT-aspc1	Limch1
Itga11	4.27766e-13	0.951497	0.271	0.073	8.70675e-09	mPRAT-aspc1	Itga11
Rgs6	9.41579e-13	1.4127	0.312	0.103	1.91649e-08	mPRAT-aspc1	Rgs6
Fstl1	1.62564e-12	0.914386	0.673	0.447	3.30884e-08	mPRAT-aspc1	Fstl1
Prrx1	1.66242e-12	0.736159	0.708	0.512	3.38369e-08	mPRAT-aspc1	Prrx1
Ext1	1.82495e-12	0.769751	0.929	0.894	3.7145e-08	mPRAT-aspc1	Ext1
Gas7	1.93274e-12	1.26088	0.5	0.279	3.93389e-08	mPRAT-aspc1	Gas7
Ifi205	2.13948e-12	0.926552	0.348	0.13	4.3547e-08	mPRAT-aspc1	Ifi205
Antxr2	2.15426e-12	0.662211	0.765	0.599	4.38477e-08	mPRAT-aspc1	Antxr2
Aig1	3.14337e-12	0.981439	0.476	0.252	6.39802e-08	mPRAT-aspc1	Aig1
Esr1	3.29662e-12	0.983553	0.482	0.255	6.70995e-08	mPRAT-aspc1	Esr1
Anxa1	3.90062e-12	0.836978	0.298	0.098	7.93933e-08	mPRAT-aspc1	Anxa1
Zbtb7c	6.05287e-12	0.829915	0.31	0.106	1.232e-07	mPRAT-aspc1	Zbtb7c
Ston2	7.05216e-12	1.02032	0.298	0.098	1.4354e-07	mPRAT-aspc1	Ston2
Nid1	9.90589e-12	0.807662	0.729	0.564	2.01625e-07	mPRAT-aspc1	Nid1
Sntb2	1.02699e-11	0.73133	0.688	0.493	2.09033e-07	mPRAT-aspc1	Sntb2
Dok6	1.40842e-11	1.29029	0.271	0.087	2.8667e-07	mPRAT-aspc1	Dok6
Emilin2	1.44255e-11	0.807934	0.33	0.127	2.93616e-07	mPRAT-aspc1	Emilin2
Lgi2	1.59988e-11	0.760791	0.25	0.068	3.2564e-07	mPRAT-aspc1	Lgi2
Ampd3	1.80362e-11	0.783236	0.345	0.138	3.6711e-07	mPRAT-aspc1	Ampd3
Ldlrad4	1.85899e-11	0.80679	0.625	0.393	3.7838e-07	mPRAT-aspc1	Ldlrad4
Nckap5	2.9128e-11	0.780213	0.598	0.358	5.9287e-07	mPRAT-aspc1	Nckap5
Il1rl2	4.69239e-11	0.83895	0.31	0.119	9.55089e-07	mPRAT-aspc1	Il1rl2
Pcsk6	7.7298e-11	1.17503	0.491	0.295	1.57332e-06	mPRAT-aspc1	Pcsk6
Fmn1	8.15941e-11	0.745547	0.277	0.092	1.66077e-06	mPRAT-aspc1	Fmn1
Gli3	9.85393e-11	0.561592	0.756	0.604	2.00567e-06	mPRAT-aspc1	Gli3
Nav1	1.12426e-10	0.600555	0.824	0.707	2.28831e-06	mPRAT-aspc1	Nav1
Mitf	1.27021e-10	0.800676	0.696	0.528	2.58538e-06	mPRAT-aspc1	Mitf
Diaph1	1.76757e-10	0.773491	0.42	0.206	3.59771e-06	mPRAT-aspc1	Diaph1
Epb41l3	1.88262e-10	0.722101	0.295	0.108	3.83189e-06	mPRAT-aspc1	Epb41l3
Dclk1	2.07843e-10	0.703965	0.628	0.398	4.23043e-06	mPRAT-aspc1	Dclk1
Sdk1	2.24368e-10	0.738167	0.81	0.669	4.56679e-06	mPRAT-aspc1	Sdk1
Clec3b	2.48497e-10	0.771743	0.414	0.206	5.0579e-06	mPRAT-aspc1	Clec3b
Rcan2	2.57792e-10	0.969578	0.429	0.217	5.24709e-06	mPRAT-aspc1	Rcan2
Mfap5	3.98669e-10	0.846202	0.381	0.179	8.11451e-06	mPRAT-aspc1	Mfap5
Fndc1	5.11704e-10	1.32111	0.378	0.195	1.04152e-05	mPRAT-aspc1	Fndc1
Pcolce2	6.15941e-10	0.844493	0.304	0.122	1.25369e-05	mPRAT-aspc1	Pcolce2
Gfpt2	9.40408e-10	1.08768	0.467	0.271	1.91411e-05	mPRAT-aspc1	Gfpt2
Ltbp1	1.09124e-09	0.459891	0.795	0.596	2.22111e-05	mPRAT-aspc1	Ltbp1
Efemp1	1.14794e-09	0.887317	0.497	0.295	2.33652e-05	mPRAT-aspc1	Efemp1
Adamtsl3	1.69059e-09	0.824615	0.58	0.379	3.44102e-05	mPRAT-aspc1	Adamtsl3
Dpt	1.71586e-09	0.693856	0.312	0.127	3.49245e-05	mPRAT-aspc1	Dpt
Phactr1	1.81648e-09	0.699716	0.402	0.198	3.69726e-05	mPRAT-aspc1	Phactr1
Camk1d	2.14302e-09	0.72742	0.827	0.748	4.36191e-05	mPRAT-aspc1	Camk1d
Arhgap18	3.09205e-09	0.758044	0.524	0.328	6.29355e-05	mPRAT-aspc1	Arhgap18
Vcan	3.47899e-09	0.74471	0.318	0.144	7.08113e-05	mPRAT-aspc1	Vcan
Slco3a1	3.59608e-09	0.979712	0.467	0.282	7.31945e-05	mPRAT-aspc1	Slco3a1
Itgb5	3.75791e-09	0.671476	0.283	0.114	7.64886e-05	mPRAT-aspc1	Itgb5
Nav3	4.83868e-09	0.72463	0.86	0.745	9.84864e-05	mPRAT-aspc1	Nav3
Filip1	5.12114e-09	0.633912	0.259	0.092	0.000104236	mPRAT-aspc1	Filip1
Flrt2	6.81345e-09	0.800052	0.479	0.274	0.000138681	mPRAT-aspc1	Flrt2
Psd3	8.18774e-09	0.64968	0.765	0.664	0.000166653	mPRAT-aspc1	Psd3
Adamtsl1	1.15357e-08	0.448281	0.81	0.593	0.000234798	mPRAT-aspc1	Adamtsl1
Htra3	1.27128e-08	0.722185	0.551	0.377	0.000258756	mPRAT-aspc1	Htra3
Aox3	1.34259e-08	0.848889	0.446	0.276	0.000273272	mPRAT-aspc1	Aox3
Taok3	1.60542e-08	0.602147	0.604	0.444	0.000326767	mPRAT-aspc1	Taok3
Hecw2	1.64696e-08	0.995343	0.304	0.141	0.000335222	mPRAT-aspc1	Hecw2
Lsp1	1.8126e-08	0.739348	0.375	0.198	0.000368936	mPRAT-aspc1	Lsp1
Dock4	1.85641e-08	0.803914	0.604	0.458	0.000377854	mPRAT-aspc1	Dock4
Axl	2.46785e-08	0.636445	0.545	0.355	0.000502306	mPRAT-aspc1	Axl
Rab30	2.65199e-08	0.657838	0.503	0.322	0.000539786	mPRAT-aspc1	Rab30
Snx24	2.89787e-08	0.630641	0.515	0.32	0.000589833	mPRAT-aspc1	Snx24
Kif2a	3.15942e-08	0.723868	0.42	0.233	0.000643069	mPRAT-aspc1	Kif2a
Atp10a	3.47994e-08	0.669592	0.28	0.122	0.000708308	mPRAT-aspc1	Atp10a
Col5a3	4.31438e-08	0.82366	0.417	0.249	0.000878149	mPRAT-aspc1	Col5a3
Lims2	4.56676e-08	0.578155	0.315	0.144	0.000929518	mPRAT-aspc1	Lims2
Samhd1	4.74552e-08	0.637322	0.363	0.19	0.000965902	mPRAT-aspc1	Samhd1
Myof	4.8637e-08	0.778641	0.369	0.209	0.000989958	mPRAT-aspc1	Myof
Smurf2	6.96436e-08	0.873949	0.655	0.539	0.00141753	mPRAT-aspc1	Smurf2
Pcsk5	7.20967e-08	0.599115	0.545	0.355	0.00146746	mPRAT-aspc1	Pcsk5
Svil	7.88507e-08	0.427044	0.801	0.65	0.00160493	mPRAT-aspc1	Svil
Pvt1	8.91121e-08	0.60402	0.366	0.19	0.00181379	mPRAT-aspc1	Pvt1
Epb41l2	1.02135e-07	0.423683	0.812	0.729	0.00207885	mPRAT-aspc1	Epb41l2
Dnm1	1.05072e-07	0.646348	0.408	0.238	0.00213863	mPRAT-aspc1	Dnm1
Slit3	1.34273e-07	0.391777	0.994	0.951	0.00273298	mPRAT-aspc1	Slit3
Pla2r1	1.36912e-07	0.603678	0.527	0.358	0.0027867	mPRAT-aspc1	Pla2r1
Celf2	1.4399e-07	0.267461	1	0.986	0.00293077	mPRAT-aspc1	Celf2
Col3a1	1.49941e-07	0.450298	0.771	0.621	0.00305191	mPRAT-aspc1	Col3a1
Nmt2	1.69141e-07	0.647625	0.417	0.249	0.0034427	mPRAT-aspc1	Nmt2
Sirpa	1.8351e-07	0.683141	0.256	0.114	0.00373515	mPRAT-aspc1	Sirpa
Akap13	2.11996e-07	0.4143	0.887	0.818	0.00431496	mPRAT-aspc1	Akap13
Tacc2	2.33274e-07	0.671777	0.405	0.244	0.00474806	mPRAT-aspc1	Tacc2
Tspan5	3.15348e-07	0.576434	0.693	0.537	0.00641859	mPRAT-aspc1	Tspan5
Col1a2	3.21334e-07	0.480267	0.705	0.572	0.00654043	mPRAT-aspc1	Col1a2
Gxylt2	3.32904e-07	0.544742	0.321	0.163	0.00677592	mPRAT-aspc1	Gxylt2
Rhoq	3.56582e-07	0.556569	0.491	0.325	0.00725786	mPRAT-aspc1	Rhoq
Ablim1	3.64814e-07	0.538866	0.729	0.558	0.00742542	mPRAT-aspc1	Ablim1
Pde8a	3.74338e-07	0.711457	0.429	0.268	0.00761928	mPRAT-aspc1	Pde8a
Arl15	3.91532e-07	0.361984	0.881	0.821	0.00796924	mPRAT-aspc1	Arl15
Enox1	4.41522e-07	0.474788	0.515	0.341	0.00898673	mPRAT-aspc1	Enox1
Tmem178b	5.38525e-07	0.780874	0.345	0.195	0.0109611	mPRAT-aspc1	Tmem178b
Dcbld2	6.08527e-07	0.541098	0.467	0.298	0.012386	mPRAT-aspc1	Dcbld2
Camk2d	6.27865e-07	0.544916	0.75	0.623	0.0127796	mPRAT-aspc1	Camk2d
Lpar1	7.44491e-07	0.581178	0.551	0.407	0.0151534	mPRAT-aspc1	Lpar1
Fgf2	7.46414e-07	0.694934	0.286	0.138	0.0151925	mPRAT-aspc1	Fgf2
Tek	7.97996e-07	0.761675	0.423	0.271	0.0162424	mPRAT-aspc1	Tek
Steap3	8.15975e-07	0.529661	0.446	0.271	0.0166084	mPRAT-aspc1	Steap3
Elf4	9.82888e-07	0.540742	0.292	0.141	0.0200057	mPRAT-aspc1	Elf4
Tgfbr3	1.00035e-06	0.385576	0.911	0.835	0.0203612	mPRAT-aspc1	Tgfbr3
Nox4	1.01951e-06	0.657446	0.381	0.22	0.0207512	mPRAT-aspc1	Nox4
Slc44a1	1.34747e-06	0.536395	0.574	0.404	0.0274264	mPRAT-aspc1	Slc44a1
Sp100	1.42647e-06	0.593563	0.488	0.325	0.0290344	mPRAT-aspc1	Sp100
Mast4	1.69856e-06	0.405655	0.875	0.756	0.0345724	mPRAT-aspc1	Mast4
Nxpe4	1.8254e-06	0.702346	0.405	0.257	0.0371542	mPRAT-aspc1	Nxpe4
Bnc2	1.91902e-06	0.449005	0.601	0.45	0.0390598	mPRAT-aspc1	Bnc2
Timp2	2.05936e-06	0.703137	0.461	0.325	0.0419161	mPRAT-aspc1	Timp2
Tanc2	2.2614e-06	0.523712	0.369	0.214	0.0460286	mPRAT-aspc1	Tanc2
Adamts2	2.29234e-06	0.389262	0.673	0.499	0.0466583	mPRAT-aspc1	Adamts2
Adam12	2.53698e-37	1.75611	0.836	0.509	5.16376e-33	mPRAT-aspc2	Adam12
Csmd1	4.07292e-31	2.42966	0.594	0.191	8.29002e-27	mPRAT-aspc2	Csmd1
Hgf	1.34369e-24	2.0017	0.478	0.15	2.73494e-20	mPRAT-aspc2	Hgf
Fmo2	4.06543e-24	1.74771	0.491	0.152	8.27477e-20	mPRAT-aspc2	Fmo2
Pcdh9	6.24265e-24	1.80749	0.509	0.171	1.27063e-19	mPRAT-aspc2	Pcdh9
Foxp2	1.22119e-22	1.22985	0.761	0.457	2.48561e-18	mPRAT-aspc2	Foxp2
Slc24a3	2.76935e-22	1.2169	0.843	0.636	5.63674e-18	mPRAT-aspc2	Slc24a3
Ccbe1	4.52849e-22	1.07751	0.739	0.413	9.21729e-18	mPRAT-aspc2	Ccbe1
Gria4	2.59274e-21	1.68165	0.428	0.124	5.27727e-17	mPRAT-aspc2	Gria4
9530026P05Rik	1.88713e-20	1.61928	0.597	0.302	3.84106e-16	mPRAT-aspc2	9530026P05Rik
Cdh19	2.42405e-20	1.55383	0.374	0.098	4.93391e-16	mPRAT-aspc2	Cdh19
Dpyd	2.964e-20	1.1561	0.805	0.556	6.03293e-16	mPRAT-aspc2	Dpyd
Frem1	1.10998e-19	1.30822	0.296	0.047	2.25924e-15	mPRAT-aspc2	Frem1
Gpc6	3.2547e-19	0.971182	0.943	0.889	6.62461e-15	mPRAT-aspc2	Gpc6
Ptprd	4.16114e-19	1.01056	0.805	0.553	8.46959e-15	mPRAT-aspc2	Ptprd
Plcl1	9.2722e-19	1.28778	0.742	0.506	1.88726e-14	mPRAT-aspc2	Plcl1
Unc13b	2.15943e-18	1.30626	0.333	0.08	4.39531e-14	mPRAT-aspc2	Unc13b
Adgrl3	5.3419e-18	1.64472	0.255	0.036	1.08729e-13	mPRAT-aspc2	Adgrl3
Atxn1	1.81048e-17	0.978396	0.818	0.589	3.68504e-13	mPRAT-aspc2	Atxn1
Stard13	2.78287e-17	1.02265	0.711	0.486	5.66426e-13	mPRAT-aspc2	Stard13
Mtss1	2.82774e-17	1.23205	0.575	0.295	5.75558e-13	mPRAT-aspc2	Mtss1
B130024G19Rik	3.88785e-17	1.09799	0.346	0.096	7.91332e-13	mPRAT-aspc2	B130024G19Rik
Mir99ahg	4.81014e-17	0.573819	0.981	0.974	9.79055e-13	mPRAT-aspc2	Mir99ahg
B3galt1	5.96457e-17	1.03036	0.827	0.667	1.21403e-12	mPRAT-aspc2	B3galt1
Tmcc3	7.20351e-17	1.22945	0.701	0.504	1.4662e-12	mPRAT-aspc2	Tmcc3
Il1rapl1	1.47002e-16	1.75052	0.314	0.075	2.99208e-12	mPRAT-aspc2	Il1rapl1
Cfh	1.65205e-16	1.44014	0.572	0.333	3.36259e-12	mPRAT-aspc2	Cfh
Fgf10	1.71799e-15	1.44814	0.61	0.377	3.49679e-11	mPRAT-aspc2	Fgf10
Slc16a7	9.3237e-15	1.09082	0.365	0.129	1.89775e-10	mPRAT-aspc2	Slc16a7
Ngf	1.22783e-14	1.24671	0.462	0.22	2.49912e-10	mPRAT-aspc2	Ngf
Igfbp3	2.32902e-14	1.46137	0.296	0.08	4.74048e-10	mPRAT-aspc2	Igfbp3
Gm29683	2.618e-14	1.16726	0.349	0.119	5.32867e-10	mPRAT-aspc2	Gm29683
Kcnt2	3.73471e-14	0.900317	0.774	0.646	7.60163e-10	mPRAT-aspc2	Kcnt2
Meis2	5.90331e-14	0.775856	0.855	0.742	1.20156e-09	mPRAT-aspc2	Meis2
Matn2	3.11009e-13	1.03614	0.28	0.078	6.33028e-09	mPRAT-aspc2	Matn2
Nrp1	7.64665e-13	0.891092	0.767	0.62	1.5564e-08	mPRAT-aspc2	Nrp1
Lrfn2	1.1808e-11	0.995441	0.28	0.09	2.40341e-07	mPRAT-aspc2	Lrfn2
Cp	1.29149e-11	0.965547	0.755	0.636	2.62869e-07	mPRAT-aspc2	Cp
Rbms3	1.32484e-11	0.475692	0.987	0.964	2.69659e-07	mPRAT-aspc2	Rbms3
Fgd5	6.51838e-11	0.858974	0.27	0.09	1.32675e-06	mPRAT-aspc2	Fgd5
Sned1	1.07993e-10	1.01098	0.613	0.424	2.19809e-06	mPRAT-aspc2	Sned1
Pakap.1	2.77783e-10	0.696086	0.456	0.23	5.654e-06	mPRAT-aspc2	Pakap.1
Gm17167	3.47475e-10	1.06662	0.428	0.23	7.0725e-06	mPRAT-aspc2	Gm17167
Fbln1	4.305e-10	1.00857	0.264	0.096	8.76241e-06	mPRAT-aspc2	Fbln1
Gm13052	6.1297e-10	0.986508	0.343	0.158	1.24764e-05	mPRAT-aspc2	Gm13052
Aff3	7.76893e-10	0.889136	0.579	0.385	1.58129e-05	mPRAT-aspc2	Aff3
Tspan9	8.45262e-10	0.738096	0.434	0.23	1.72045e-05	mPRAT-aspc2	Tspan9
Nkain2	1.04661e-09	2.49178	0.311	0.152	2.13027e-05	mPRAT-aspc2	Nkain2
Pappa	1.15552e-09	0.984553	0.403	0.207	2.35195e-05	mPRAT-aspc2	Pappa
Cadm1	2.21622e-09	1.02128	0.264	0.098	4.5109e-05	mPRAT-aspc2	Cadm1
Gucy1a2	2.83878e-09	0.878213	0.591	0.421	5.77805e-05	mPRAT-aspc2	Gucy1a2
Apoe	3.37974e-09	0.723981	0.258	0.096	6.87912e-05	mPRAT-aspc2	Apoe
Nr2f2	4.96918e-09	1.09026	0.377	0.204	0.000101143	mPRAT-aspc2	Nr2f2
Pknox2	7.78837e-09	0.884358	0.538	0.37	0.000158524	mPRAT-aspc2	Pknox2
Abca8a	1.57996e-08	0.601724	0.877	0.793	0.000321586	mPRAT-aspc2	Abca8a
Pde5a	1.73014e-08	0.642382	0.302	0.129	0.000352152	mPRAT-aspc2	Pde5a
Cdc14a	1.75492e-08	0.93094	0.525	0.385	0.000357197	mPRAT-aspc2	Cdc14a
Rora	2.73056e-08	0.399591	0.991	0.959	0.000555777	mPRAT-aspc2	Rora
Adh1	2.76544e-08	0.736492	0.283	0.121	0.000562878	mPRAT-aspc2	Adh1
Lifr	2.86261e-08	0.569281	0.704	0.558	0.000582656	mPRAT-aspc2	Lifr
Cdh11	3.36148e-08	0.910286	0.311	0.145	0.000684195	mPRAT-aspc2	Cdh11
Nxn	3.78085e-08	0.83094	0.343	0.168	0.000769554	mPRAT-aspc2	Nxn
Dpep1	6.32305e-08	0.746907	0.752	0.661	0.00128699	mPRAT-aspc2	Dpep1
Frmd4a	7.75961e-08	0.772723	0.465	0.305	0.00157939	mPRAT-aspc2	Frmd4a
Spon1	8.44597e-08	0.774509	0.421	0.251	0.00171909	mPRAT-aspc2	Spon1
Osmr	9.38301e-08	0.862265	0.513	0.372	0.00190982	mPRAT-aspc2	Osmr
Arhgap24	1.50516e-07	0.377287	0.956	0.946	0.0030636	mPRAT-aspc2	Arhgap24
Dlc1	1.68906e-07	0.423944	0.987	0.961	0.00343791	mPRAT-aspc2	Dlc1
Tiam2	1.71578e-07	0.795315	0.264	0.121	0.00349229	mPRAT-aspc2	Tiam2
Cxcl12	2.10168e-07	0.808357	0.308	0.155	0.00427776	mPRAT-aspc2	Cxcl12
Adap2	2.34069e-07	0.867048	0.252	0.111	0.00476424	mPRAT-aspc2	Adap2
Arhgap32	2.54932e-07	0.697781	0.645	0.522	0.00518889	mPRAT-aspc2	Arhgap32
Nhs	3.63776e-07	0.983546	0.346	0.186	0.00740429	mPRAT-aspc2	Nhs
Mdga2	4.87813e-07	1.12142	0.274	0.129	0.00992895	mPRAT-aspc2	Mdga2
Fmo1	6.81415e-07	0.771853	0.465	0.328	0.0138695	mPRAT-aspc2	Fmo1
Tox	9.62643e-07	0.916532	0.336	0.191	0.0195936	mPRAT-aspc2	Tox
Bicc1	1.042e-06	0.400166	0.909	0.884	0.0212088	mPRAT-aspc2	Bicc1
Apod	1.06055e-06	1.34596	0.261	0.129	0.0215864	mPRAT-aspc2	Apod
Il1r1	1.46769e-06	0.663174	0.648	0.543	0.0298733	mPRAT-aspc2	Il1r1
Cped1	1.57846e-06	0.407546	0.931	0.894	0.0321281	mPRAT-aspc2	Cped1
St3gal4	1.77437e-06	0.784528	0.503	0.377	0.0361156	mPRAT-aspc2	St3gal4
Gnao1	2.23213e-06	0.585102	0.443	0.284	0.0454329	mPRAT-aspc2	Gnao1
Col15a1	2.30556e-06	0.739814	0.591	0.421	0.0469273	mPRAT-aspc2	Col15a1
Nrg4	1.09477e-110	3.60121	0.941	0.023	2.22829e-106	mPRAT-aspc3	Nrg4
Prkar2b	3.04129e-110	4.03725	1	0.032	6.19025e-106	mPRAT-aspc3	Prkar2b
Plin1	6.85159e-110	2.76244	0.902	0.017	1.39457e-105	mPRAT-aspc3	Plin1
Acsl1	1.57055e-106	4.25437	0.98	0.034	3.1967e-102	mPRAT-aspc3	Acsl1
Adipor2	5.45953e-103	3.79436	0.98	0.035	1.11123e-98	mPRAT-aspc3	Adipor2
Gpd1	2.60536e-100	2.40116	0.784	0.011	5.30294e-96	mPRAT-aspc3	Gpd1
Acacb	4.37454e-100	3.4319	0.98	0.035	8.90394e-96	mPRAT-aspc3	Acacb
Cidec	2.99291e-96	2.67329	0.804	0.015	6.09178e-92	mPRAT-aspc3	Cidec
Ankef1	5.07482e-95	2.6718	0.882	0.028	1.03293e-90	mPRAT-aspc3	Ankef1
Lipe	1.37952e-93	2.8583	0.902	0.031	2.80789e-89	mPRAT-aspc3	Lipe
Ctcflos	1.74992e-93	2.75485	0.765	0.014	3.56178e-89	mPRAT-aspc3	Ctcflos
Dgat2	1.79839e-92	2.87075	0.824	0.021	3.66045e-88	mPRAT-aspc3	Dgat2
Gm16168	5.8264e-92	2.57596	0.745	0.012	1.18591e-87	mPRAT-aspc3	Gm16168
Dgat1	9.69943e-92	1.81775	0.745	0.012	1.97422e-87	mPRAT-aspc3	Dgat1
Rgs7	3.6002e-91	3.4031	0.922	0.038	7.32785e-87	mPRAT-aspc3	Rgs7
Pck1	1.79605e-89	2.36793	0.843	0.024	3.65569e-85	mPRAT-aspc3	Pck1
Ces1d	1.08898e-88	2.192	0.784	0.018	2.21651e-84	mPRAT-aspc3	Ces1d
Mlxipl	1.55362e-88	2.41061	0.843	0.026	3.16224e-84	mPRAT-aspc3	Mlxipl
Rbm47	1.36016e-86	2.25014	0.765	0.018	2.76847e-82	mPRAT-aspc3	Rbm47
Slc27a1	9.64639e-86	2.24687	0.824	0.026	1.96343e-81	mPRAT-aspc3	Slc27a1
Slc22a23	9.86326e-86	2.04514	0.686	0.011	2.00757e-81	mPRAT-aspc3	Slc22a23
Ppargc1b	2.75782e-85	3.22424	0.882	0.037	5.61327e-81	mPRAT-aspc3	Ppargc1b
Slc36a2	2.08282e-84	2.49686	0.843	0.032	4.23938e-80	mPRAT-aspc3	Slc36a2
Tenm4	2.22279e-83	3.29618	0.863	0.038	4.52426e-79	mPRAT-aspc3	Tenm4
Adipoq	9.75634e-83	1.47405	0.588	0.003	1.9858e-78	mPRAT-aspc3	Adipoq
Fgf14	2.52599e-82	3.1137	0.725	0.018	5.14139e-78	mPRAT-aspc3	Fgf14
Tspan18	1.78132e-81	3.09812	0.922	0.049	3.6257e-77	mPRAT-aspc3	Tspan18
Acvr1c	1.78211e-81	2.21087	0.706	0.015	3.6273e-77	mPRAT-aspc3	Acvr1c
Myl1	2.73686e-81	1.70113	0.627	0.008	5.57061e-77	mPRAT-aspc3	Myl1
Sh2b2	8.0915e-80	1.58937	0.667	0.012	1.64694e-75	mPRAT-aspc3	Sh2b2
Gm3289	9.01476e-80	1.53916	0.549	0.002	1.83486e-75	mPRAT-aspc3	Gm3289
Adrb3	1.3272e-79	1.95959	0.667	0.012	2.70137e-75	mPRAT-aspc3	Adrb3
Plin4	1.59046e-79	2.34466	0.686	0.015	3.23722e-75	mPRAT-aspc3	Plin4
Car3	4.41292e-77	3.62398	0.902	0.054	8.98205e-73	mPRAT-aspc3	Car3
Chpt1	6.37615e-77	3.09235	0.922	0.058	1.2978e-72	mPRAT-aspc3	Chpt1
Pfkfb3	5.96029e-75	2.42592	0.843	0.043	1.21316e-70	mPRAT-aspc3	Pfkfb3
Agpat2	8.26161e-75	1.45421	0.569	0.006	1.68157e-70	mPRAT-aspc3	Agpat2
Pde3b	2.15906e-74	3.66526	0.882	0.058	4.39456e-70	mPRAT-aspc3	Pde3b
Mif4gd	4.454e-74	1.35955	0.529	0.003	9.06567e-70	mPRAT-aspc3	Mif4gd
A530053G22Rik	9.05145e-73	2.57817	0.765	0.032	1.84233e-68	mPRAT-aspc3	A530053G22Rik
Hk2	1.33547e-72	1.75614	0.667	0.018	2.71822e-68	mPRAT-aspc3	Hk2
Pcx	4.14205e-72	2.27454	0.824	0.041	8.43073e-68	mPRAT-aspc3	Pcx
Lgals12	1.18652e-71	1.42466	0.569	0.008	2.41504e-67	mPRAT-aspc3	Lgals12
Cdo1	2.6686e-71	1.82417	0.608	0.012	5.43167e-67	mPRAT-aspc3	Cdo1
Art3	7.28088e-71	2.30876	0.725	0.028	1.48195e-66	mPRAT-aspc3	Art3
Miga2	7.52282e-71	1.70672	0.686	0.021	1.53119e-66	mPRAT-aspc3	Miga2
Fam13a	2.28925e-70	3.32231	0.941	0.075	4.65955e-66	mPRAT-aspc3	Fam13a
Ppara	7.67199e-70	3.55562	0.765	0.035	1.56156e-65	mPRAT-aspc3	Ppara
Pdk4	1.20888e-68	1.9379	0.529	0.006	2.46056e-64	mPRAT-aspc3	Pdk4
Cd36	3.32869e-67	2.84525	0.863	0.063	6.77522e-63	mPRAT-aspc3	Cd36
Rgcc	3.42262e-66	1.71551	0.627	0.018	6.96639e-62	mPRAT-aspc3	Rgcc
Fabp4	3.968e-66	2.77371	0.882	0.067	8.07646e-62	mPRAT-aspc3	Fabp4
Sox6	4.96473e-66	2.44679	0.882	0.064	1.01052e-61	mPRAT-aspc3	Sox6
Aifm2	6.80541e-66	1.29282	0.529	0.008	1.38517e-61	mPRAT-aspc3	Aifm2
Cyp2e1	1.21151e-65	2.3322	0.608	0.017	2.46592e-61	mPRAT-aspc3	Cyp2e1
Lpin1	1.72287e-65	2.07059	0.804	0.049	3.50673e-61	mPRAT-aspc3	Lpin1
Acaca	2.0425e-65	3.78342	0.902	0.08	4.15731e-61	mPRAT-aspc3	Acaca
Pfkfb1	7.66958e-65	1.59037	0.667	0.024	1.56107e-60	mPRAT-aspc3	Pfkfb1
Thrsp	8.6473e-65	1.65651	0.608	0.017	1.76007e-60	mPRAT-aspc3	Thrsp
Tmem45b	2.89803e-64	2.73949	0.51	0.008	5.89865e-60	mPRAT-aspc3	Tmem45b
Erbb4	2.08389e-63	2.5342	0.51	0.008	4.24155e-59	mPRAT-aspc3	Erbb4
Fasn	4.38854e-63	1.74095	0.51	0.008	8.93243e-59	mPRAT-aspc3	Fasn
Tob1	5.12562e-63	1.40595	0.569	0.014	1.04327e-58	mPRAT-aspc3	Tob1
Mgll	1.73432e-62	2.53311	0.961	0.093	3.53004e-58	mPRAT-aspc3	Mgll
Crat	2.13861e-62	1.02297	0.49	0.006	4.35292e-58	mPRAT-aspc3	Crat
Inca1	2.21413e-62	1.07173	0.49	0.006	4.50665e-58	mPRAT-aspc3	Inca1
Tmeff1	3.92484e-62	1.2717	0.549	0.012	7.98861e-58	mPRAT-aspc3	Tmeff1
Ppargc1a	7.95454e-62	1.92557	0.529	0.011	1.61907e-57	mPRAT-aspc3	Ppargc1a
Pnpla3	1.60756e-61	1.76987	0.529	0.011	3.27203e-57	mPRAT-aspc3	Pnpla3
Slc25a19	2.43421e-61	1.23014	0.529	0.011	4.95458e-57	mPRAT-aspc3	Slc25a19
Kcnk3	3.49065e-61	1.95557	0.569	0.015	7.10487e-57	mPRAT-aspc3	Kcnk3
Ppp2r5a	7.44088e-61	2.96947	0.941	0.104	1.51452e-56	mPRAT-aspc3	Ppp2r5a
Palmd	9.70361e-61	1.77441	0.608	0.021	1.97507e-56	mPRAT-aspc3	Palmd
Lncbate1	1.66337e-60	1.23112	0.49	0.008	3.38561e-56	mPRAT-aspc3	Lncbate1
Cluh	3.52863e-60	1.33496	0.706	0.035	7.18217e-56	mPRAT-aspc3	Cluh
Pmepa1	4.66433e-60	2.32286	0.784	0.054	9.49377e-56	mPRAT-aspc3	Pmepa1
Apol6	5.75364e-60	1.26116	0.49	0.008	1.1711e-55	mPRAT-aspc3	Apol6
Cidea	9.88504e-60	2.5667	0.51	0.011	2.012e-55	mPRAT-aspc3	Cidea
Pnpla2	1.35512e-59	1.03286	0.471	0.006	2.75822e-55	mPRAT-aspc3	Pnpla2
Aacs	2.59859e-59	1.55242	0.647	0.028	5.28917e-55	mPRAT-aspc3	Aacs
Gm35552	3.18937e-59	1.18071	0.451	0.005	6.49163e-55	mPRAT-aspc3	Gm35552
Pank1	4.55304e-59	2.31029	0.51	0.011	9.26725e-55	mPRAT-aspc3	Pank1
Grk3	3.7054e-58	1.71396	0.588	0.021	7.54198e-54	mPRAT-aspc3	Grk3
Fry	4.84708e-58	2.98686	0.922	0.104	9.86574e-54	mPRAT-aspc3	Fry
Vegfa	8.73189e-58	1.93715	0.784	0.055	1.77729e-53	mPRAT-aspc3	Vegfa
Noct	1.99177e-57	1.46544	0.549	0.017	4.05405e-53	mPRAT-aspc3	Noct
Ephx2	1.33992e-56	1.42754	0.647	0.031	2.72728e-52	mPRAT-aspc3	Ephx2
Slc22a3	4.21501e-55	1.27986	0.471	0.009	8.57924e-51	mPRAT-aspc3	Slc22a3
Gys1	4.72012e-55	1.64631	0.706	0.043	9.60732e-51	mPRAT-aspc3	Gys1
Smoc1	7.42001e-55	2.19711	0.725	0.05	1.51027e-50	mPRAT-aspc3	Smoc1
A830018L16Rik	9.93348e-55	1.52828	0.451	0.008	2.02186e-50	mPRAT-aspc3	A830018L16Rik
Acad11	3.03727e-53	1.18434	0.51	0.015	6.18206e-49	mPRAT-aspc3	Acad11
Akap1	2.48747e-52	1.88796	0.647	0.038	5.063e-48	mPRAT-aspc3	Akap1
Coq8a	9.95775e-51	1.42275	0.392	0.005	2.0268e-46	mPRAT-aspc3	Coq8a
Cd1d1	2.01924e-50	0.535936	0.333	0	4.10996e-46	mPRAT-aspc3	Cd1d1
Gpat4	4.65383e-50	1.62912	0.745	0.06	9.47241e-46	mPRAT-aspc3	Gpat4
Gk	1.65667e-49	2.4161	0.412	0.008	3.37199e-45	mPRAT-aspc3	Gk
Gpat3	1.04572e-48	1.75159	0.471	0.015	2.12847e-44	mPRAT-aspc3	Gpat3
Hacd2	1.79038e-48	2.60399	0.843	0.099	3.64413e-44	mPRAT-aspc3	Hacd2
Aspg	3.61124e-48	1.51381	0.392	0.006	7.35031e-44	mPRAT-aspc3	Aspg
Med12l	9.12699e-48	1.52155	0.608	0.037	1.85771e-43	mPRAT-aspc3	Med12l
Prxl2a	2.26154e-47	0.790442	0.353	0.003	4.60313e-43	mPRAT-aspc3	Prxl2a
B3galt2	2.73589e-47	0.945711	0.333	0.002	5.56863e-43	mPRAT-aspc3	B3galt2
Acox1	7.79434e-47	2.36733	0.804	0.093	1.58646e-42	mPRAT-aspc3	Acox1
Slc16a10	1.60627e-46	1.77509	0.529	0.026	3.2694e-42	mPRAT-aspc3	Slc16a10
Adra1a	1.62732e-46	2.12892	0.588	0.037	3.31226e-42	mPRAT-aspc3	Adra1a
Taldo1	1.76287e-46	1.0604	0.451	0.014	3.58814e-42	mPRAT-aspc3	Taldo1
Ralgapa2	4.92786e-46	2.76086	0.98	0.193	1.00302e-41	mPRAT-aspc3	Ralgapa2
Sorbs1	1.43846e-45	3.04404	0.941	0.174	2.92784e-41	mPRAT-aspc3	Sorbs1
Klhdc7a	1.84471e-45	0.82956	0.431	0.012	3.75471e-41	mPRAT-aspc3	Klhdc7a
Eml5	1.85397e-45	0.97947	0.373	0.006	3.77357e-41	mPRAT-aspc3	Eml5
Cpt1b	2.49423e-45	1.28322	0.373	0.006	5.07676e-41	mPRAT-aspc3	Cpt1b
Nnat	1.06121e-44	1.81348	0.412	0.011	2.15998e-40	mPRAT-aspc3	Nnat
Nabp1	1.16292e-44	1.03637	0.451	0.015	2.36701e-40	mPRAT-aspc3	Nabp1
Aqp7	1.92968e-44	0.868186	0.333	0.003	3.92766e-40	mPRAT-aspc3	Aqp7
Parm1	1.9513e-44	1.47855	0.431	0.014	3.97168e-40	mPRAT-aspc3	Parm1
Cav1	5.00357e-44	2.00504	0.647	0.052	1.01843e-39	mPRAT-aspc3	Cav1
Entpd5	2.00555e-43	0.927431	0.451	0.017	4.08209e-39	mPRAT-aspc3	Entpd5
Tspan12	2.02371e-43	1.88049	0.725	0.072	4.11907e-39	mPRAT-aspc3	Tspan12
Chdh	4.02178e-43	0.80143	0.373	0.008	8.18594e-39	mPRAT-aspc3	Chdh
Larp1b	4.12586e-43	1.72116	0.667	0.057	8.39777e-39	mPRAT-aspc3	Larp1b
Ehhadh	5.25117e-43	1.19233	0.471	0.02	1.06882e-38	mPRAT-aspc3	Ehhadh
Adora1	6.85915e-43	0.731517	0.373	0.008	1.39611e-38	mPRAT-aspc3	Adora1
Mrap	1.48822e-42	0.987103	0.392	0.011	3.02912e-38	mPRAT-aspc3	Mrap
Tmem132b	3.93106e-42	1.70939	0.392	0.011	8.00127e-38	mPRAT-aspc3	Tmem132b
Tmem120a	4.22833e-42	1.14406	0.451	0.018	8.60635e-38	mPRAT-aspc3	Tmem120a
4933406I18Rik	4.75602e-42	2.38959	0.863	0.131	9.6804e-38	mPRAT-aspc3	4933406I18Rik
Plaat3	5.76985e-42	1.22612	0.451	0.018	1.1744e-37	mPRAT-aspc3	Plaat3
Sik2	8.80806e-42	3.07327	0.961	0.229	1.79279e-37	mPRAT-aspc3	Sik2
Gm16685	1.29516e-41	0.811206	0.314	0.003	2.63617e-37	mPRAT-aspc3	Gm16685
Scd1	1.37729e-41	1.36288	0.51	0.028	2.80333e-37	mPRAT-aspc3	Scd1
Clstn3	6.76546e-41	0.682351	0.373	0.009	1.37704e-36	mPRAT-aspc3	Clstn3
Mmd	1.05739e-40	1.56605	0.627	0.054	2.15222e-36	mPRAT-aspc3	Mmd
Pde7b	1.65938e-40	1.72721	0.569	0.041	3.37751e-36	mPRAT-aspc3	Pde7b
Pakap	2.63907e-40	2.19298	0.706	0.08	5.37156e-36	mPRAT-aspc3	Pakap
Ivns1abp	8.75113e-40	1.51712	0.588	0.047	1.78121e-35	mPRAT-aspc3	Ivns1abp
Pkd2l2	1.13361e-39	0.826971	0.333	0.006	2.30734e-35	mPRAT-aspc3	Pkd2l2
Sntb1	2.2121e-39	1.97165	0.725	0.083	4.50251e-35	mPRAT-aspc3	Sntb1
Adig	2.87005e-39	0.722491	0.373	0.011	5.84171e-35	mPRAT-aspc3	Adig
Ucp1	1.01584e-38	1.5062	0.275	0.002	2.06765e-34	mPRAT-aspc3	Ucp1
Vat1l	1.22451e-38	0.937498	0.275	0.002	2.49236e-34	mPRAT-aspc3	Vat1l
Ddo	1.78411e-38	1.44616	0.529	0.037	3.63137e-34	mPRAT-aspc3	Ddo
Xrcc6	2.41721e-38	0.922037	0.392	0.014	4.91998e-34	mPRAT-aspc3	Xrcc6
Pik3cb	2.69582e-38	0.965355	0.412	0.017	5.48707e-34	mPRAT-aspc3	Pik3cb
Aco2	5.62477e-38	1.83203	0.843	0.128	1.14487e-33	mPRAT-aspc3	Aco2
Trarg1	7.18234e-38	1.3783	0.627	0.058	1.46189e-33	mPRAT-aspc3	Trarg1
Tshr	7.25424e-38	1.55852	0.333	0.008	1.47653e-33	mPRAT-aspc3	Tshr
Hsd17b12	1.44433e-37	1.91048	0.725	0.095	2.93979e-33	mPRAT-aspc3	Hsd17b12
Sh3glb2	1.87202e-37	0.634021	0.333	0.008	3.81031e-33	mPRAT-aspc3	Sh3glb2
Tfrc	6.52361e-37	1.25785	0.314	0.006	1.32781e-32	mPRAT-aspc3	Tfrc
Gm26671	7.1742e-37	0.79691	0.314	0.006	1.46024e-32	mPRAT-aspc3	Gm26671
Lctl	9.84507e-37	0.82357	0.314	0.006	2.00387e-32	mPRAT-aspc3	Lctl
Optn	1.83305e-36	1.28959	0.667	0.07	3.73098e-32	mPRAT-aspc3	Optn
Ifi27l2a	2.34817e-36	0.887231	0.294	0.005	4.77947e-32	mPRAT-aspc3	Ifi27l2a
Gpam	2.63186e-36	1.69669	0.608	0.06	5.35688e-32	mPRAT-aspc3	Gpam
Adtrp	2.68047e-36	0.862347	0.294	0.005	5.45583e-32	mPRAT-aspc3	Adtrp
Ccdc69	3.72999e-36	0.600586	0.294	0.005	7.59201e-32	mPRAT-aspc3	Ccdc69
Cat	4.48314e-36	1.40866	0.569	0.05	9.12498e-32	mPRAT-aspc3	Cat
Bcar3	5.60018e-36	1.23219	0.49	0.032	1.13986e-31	mPRAT-aspc3	Bcar3
Ppp2r1b	5.65929e-36	0.776215	0.49	0.032	1.15189e-31	mPRAT-aspc3	Ppp2r1b
Idh3a	7.3696e-36	0.958016	0.392	0.017	1.50001e-31	mPRAT-aspc3	Idh3a
Ppip5k1	1.25747e-35	1.3105	0.706	0.086	2.55946e-31	mPRAT-aspc3	Ppip5k1
Srebf1	1.45286e-35	0.959335	0.451	0.026	2.95716e-31	mPRAT-aspc3	Srebf1
Ak2	1.72249e-35	1.18474	0.529	0.04	3.50596e-31	mPRAT-aspc3	Ak2
Gtf2ird1	8.49791e-35	1.35159	0.569	0.054	1.72966e-30	mPRAT-aspc3	Gtf2ird1
Pparg	1.01663e-34	2.61328	0.98	0.281	2.06925e-30	mPRAT-aspc3	Pparg
Chd7	1.71479e-34	1.01939	0.647	0.069	3.49028e-30	mPRAT-aspc3	Chd7
Gnpat	1.85309e-34	1.56404	0.725	0.096	3.77178e-30	mPRAT-aspc3	Gnpat
Ppp1r3b	3.82383e-34	0.799162	0.294	0.006	7.78302e-30	mPRAT-aspc3	Ppp1r3b
Elovl6	3.85223e-34	1.8557	0.608	0.066	7.84084e-30	mPRAT-aspc3	Elovl6
4931428L18Rik	1.7277e-33	1.09479	0.275	0.005	3.51656e-29	mPRAT-aspc3	4931428L18Rik
Ormdl3	2.03356e-33	0.429608	0.275	0.005	4.13911e-29	mPRAT-aspc3	Ormdl3
Eci1	3.3657e-33	0.797419	0.431	0.026	6.85054e-29	mPRAT-aspc3	Eci1
A530065N20Rik	3.84885e-33	1.49028	0.314	0.009	7.83395e-29	mPRAT-aspc3	A530065N20Rik
Retn	4.58042e-33	0.688396	0.255	0.003	9.32299e-29	mPRAT-aspc3	Retn
Ppa1	3.24417e-32	1.05371	0.49	0.04	6.60318e-28	mPRAT-aspc3	Ppa1
Ccdc3	5.31541e-32	0.880048	0.353	0.015	1.0819e-27	mPRAT-aspc3	Ccdc3
Fam126b	7.0201e-32	1.54612	0.784	0.13	1.42887e-27	mPRAT-aspc3	Fam126b
Mknk2	1.49988e-31	0.713399	0.373	0.018	3.05286e-27	mPRAT-aspc3	Mknk2
Gys2	1.71914e-31	0.773905	0.275	0.006	3.49914e-27	mPRAT-aspc3	Gys2
Rnf152	1.81854e-31	1.37524	0.451	0.034	3.70145e-27	mPRAT-aspc3	Rnf152
Mcam	2.89539e-31	0.596256	0.275	0.006	5.89329e-27	mPRAT-aspc3	Mcam
Fam214a	3.5514e-31	2.08616	0.941	0.246	7.22852e-27	mPRAT-aspc3	Fam214a
Nav2	4.1118e-31	2.29278	0.51	0.05	8.36916e-27	mPRAT-aspc3	Nav2
Cfd	1.13748e-30	0.742495	0.255	0.005	2.31523e-26	mPRAT-aspc3	Cfd
Sybu	1.29322e-30	0.589912	0.255	0.005	2.63222e-26	mPRAT-aspc3	Sybu
Abhd15	2.78321e-30	0.581526	0.294	0.009	5.66494e-26	mPRAT-aspc3	Abhd15
Epb41	3.70095e-30	1.4086	0.784	0.131	7.53291e-26	mPRAT-aspc3	Epb41
Chst11	4.43779e-30	1.52399	0.588	0.067	9.03268e-26	mPRAT-aspc3	Chst11
Fitm2	1.50523e-29	0.722209	0.333	0.015	3.06374e-25	mPRAT-aspc3	Fitm2
Acsm3	1.5825e-29	0.825113	0.275	0.008	3.22101e-25	mPRAT-aspc3	Acsm3
P2rx5	2.05273e-29	0.576195	0.275	0.008	4.17812e-25	mPRAT-aspc3	P2rx5
Macrod1	3.312e-29	1.13215	0.471	0.043	6.74125e-25	mPRAT-aspc3	Macrod1
Slc7a10	3.94625e-29	1.48774	0.353	0.02	8.03219e-25	mPRAT-aspc3	Slc7a10
Gbe1	9.0049e-29	1.96367	0.922	0.239	1.83286e-24	mPRAT-aspc3	Gbe1
Npr3	9.66346e-29	1.14248	0.255	0.006	1.9669e-24	mPRAT-aspc3	Npr3
Adrb1	1.42864e-28	0.375123	0.255	0.006	2.90785e-24	mPRAT-aspc3	Adrb1
Tnfaip8	1.86471e-28	1.45298	0.647	0.09	3.79543e-24	mPRAT-aspc3	Tnfaip8
Cnst	2.34945e-28	1.10611	0.686	0.101	4.78207e-24	mPRAT-aspc3	Cnst
Slc25a42	6.35338e-28	1.44236	0.529	0.06	1.29317e-23	mPRAT-aspc3	Slc25a42
Gpd2	9.12357e-28	1.82935	0.647	0.106	1.85701e-23	mPRAT-aspc3	Gpd2
A530016L24Rik	1.00313e-27	0.646105	0.275	0.009	2.04178e-23	mPRAT-aspc3	A530016L24Rik
Slc12a7	2.36422e-27	0.891343	0.314	0.015	4.81214e-23	mPRAT-aspc3	Slc12a7
Gm35853	2.64216e-27	0.854578	0.294	0.012	5.37786e-23	mPRAT-aspc3	Gm35853
Tmem120b	2.83723e-27	1.43238	0.745	0.138	5.7749e-23	mPRAT-aspc3	Tmem120b
Dpf3	5.14198e-27	1.05028	0.471	0.046	1.0466e-22	mPRAT-aspc3	Dpf3
Cgnl1	8.34408e-27	1.18671	0.725	0.122	1.69835e-22	mPRAT-aspc3	Cgnl1
Gm4876	1.77949e-26	1.20548	0.333	0.02	3.62197e-22	mPRAT-aspc3	Gm4876
Pag1	2.65472e-26	0.821884	0.529	0.06	5.40342e-22	mPRAT-aspc3	Pag1
Hipk2	3.82848e-26	1.71769	0.804	0.176	7.79248e-22	mPRAT-aspc3	Hipk2
Bche	4.85542e-26	0.528248	0.275	0.011	9.88272e-22	mPRAT-aspc3	Bche
Acadm	7.27355e-26	1.44893	0.686	0.119	1.48046e-21	mPRAT-aspc3	Acadm
Car5b	1.10023e-25	0.98012	0.392	0.032	2.23941e-21	mPRAT-aspc3	Car5b
Sctr	3.53493e-25	0.595526	0.255	0.009	7.19499e-21	mPRAT-aspc3	Sctr
Bhlhe40	4.25834e-25	0.368503	0.255	0.009	8.66743e-21	mPRAT-aspc3	Bhlhe40
Uck1	5.71287e-25	0.507763	0.275	0.012	1.1628e-20	mPRAT-aspc3	Uck1
Slc25a51	9.4079e-25	1.13541	0.667	0.115	1.91488e-20	mPRAT-aspc3	Slc25a51
Dbi	1.06969e-24	0.774919	0.451	0.046	2.17725e-20	mPRAT-aspc3	Dbi
Pdgfc	1.26935e-24	0.894367	0.412	0.038	2.58364e-20	mPRAT-aspc3	Pdgfc
Por	1.29527e-24	1.64854	0.941	0.277	2.6364e-20	mPRAT-aspc3	Por
Gstz1	1.54727e-24	0.950209	0.49	0.057	3.14932e-20	mPRAT-aspc3	Gstz1
Rasl12	2.94395e-24	1.07236	0.49	0.058	5.99212e-20	mPRAT-aspc3	Rasl12
Dram1	3.44586e-24	1.46589	0.588	0.095	7.0137e-20	mPRAT-aspc3	Dram1
Scarb1	4.59548e-24	0.90119	0.392	0.035	9.35365e-20	mPRAT-aspc3	Scarb1
Tkt	4.8976e-24	1.41309	0.569	0.087	9.96858e-20	mPRAT-aspc3	Tkt
Dlat	8.52081e-24	1.1436	0.608	0.098	1.73432e-19	mPRAT-aspc3	Dlat
Gm30173	9.29443e-24	0.655178	0.255	0.011	1.89179e-19	mPRAT-aspc3	Gm30173
Acss2	1.04165e-23	1.34293	0.51	0.067	2.12018e-19	mPRAT-aspc3	Acss2
Nectin2	1.38959e-23	0.419754	0.255	0.011	2.82836e-19	mPRAT-aspc3	Nectin2
Abcb8	1.97818e-23	0.527581	0.275	0.014	4.02638e-19	mPRAT-aspc3	Abcb8
Cox5a	2.00063e-23	0.599673	0.294	0.017	4.07209e-19	mPRAT-aspc3	Cox5a
Esrrg	3.37311e-23	2.18305	0.725	0.161	6.86563e-19	mPRAT-aspc3	Esrrg
Slc25a20	1.90264e-22	1.20726	0.471	0.061	3.87264e-18	mPRAT-aspc3	Slc25a20
Prdm161	1.93758e-22	1.54843	0.804	0.199	3.94376e-18	mPRAT-aspc3	Prdm16
Immp2l	1.97868e-22	1.99631	0.961	0.433	4.0274e-18	mPRAT-aspc3	Immp2l
Hadh	2.63554e-22	0.812809	0.549	0.081	5.36437e-18	mPRAT-aspc3	Hadh
Slc25a22	3.568e-22	0.354527	0.255	0.012	7.26231e-18	mPRAT-aspc3	Slc25a22
Bnip3	7.20017e-22	1.07553	0.471	0.061	1.46552e-17	mPRAT-aspc3	Bnip3
Tob2	1.23507e-21	1.05803	0.608	0.107	2.51387e-17	mPRAT-aspc3	Tob2
Cnnm2	1.25628e-21	1.44758	0.686	0.141	2.55704e-17	mPRAT-aspc3	Cnnm2
Mpc2	1.39771e-21	0.733623	0.51	0.07	2.8449e-17	mPRAT-aspc3	Mpc2
Rbpms2	1.3991e-21	0.592055	0.373	0.035	2.84772e-17	mPRAT-aspc3	Rbpms2
4931406C07Rik	1.55921e-21	0.971986	0.51	0.073	3.17362e-17	mPRAT-aspc3	4931406C07Rik
Mecr	1.62372e-21	0.814757	0.49	0.067	3.30492e-17	mPRAT-aspc3	Mecr
Sun2	1.96122e-21	0.561166	0.275	0.017	3.99187e-17	mPRAT-aspc3	Sun2
Aplp2	2.61209e-21	1.36665	0.824	0.242	5.31664e-17	mPRAT-aspc3	Aplp2
Exd1	3.22685e-21	0.61715	0.255	0.014	6.56793e-17	mPRAT-aspc3	Exd1
Atl2	3.2481e-21	1.37477	0.706	0.151	6.61117e-17	mPRAT-aspc3	Atl2
Ermp1	3.31835e-21	0.581245	0.49	0.066	6.75417e-17	mPRAT-aspc3	Ermp1
Ywhag	4.87181e-21	1.32253	0.784	0.216	9.91608e-17	mPRAT-aspc3	Ywhag
Tns1	6.96565e-21	1.53295	0.98	0.685	1.41779e-16	mPRAT-aspc3	Tns1
Sipa1l1	1.82824e-20	1.42529	0.784	0.214	3.72121e-16	mPRAT-aspc3	Sipa1l1
Gucd1	1.99321e-20	1.50336	0.451	0.063	4.05698e-16	mPRAT-aspc3	Gucd1
Hsd17b4	2.08435e-20	1.1102	0.569	0.102	4.24248e-16	mPRAT-aspc3	Hsd17b4
Hibch	2.3568e-20	1.02655	0.686	0.142	4.79703e-16	mPRAT-aspc3	Hibch
Stat5a	2.86126e-20	0.742757	0.353	0.035	5.8238e-16	mPRAT-aspc3	Stat5a
Kcnb1	2.94585e-20	0.562263	0.275	0.018	5.99599e-16	mPRAT-aspc3	Kcnb1
Atp1a21	4.16567e-20	1.29035	0.863	0.235	8.47881e-16	mPRAT-aspc3	Atp1a2
Sh3kbp1	5.10455e-20	1.594	0.745	0.219	1.03898e-15	mPRAT-aspc3	Sh3kbp1
Sfxn5	5.71967e-20	1.15171	0.686	0.147	1.16418e-15	mPRAT-aspc3	Sfxn5
Fam241a	6.23076e-20	0.349472	0.255	0.015	1.26821e-15	mPRAT-aspc3	Fam241a
Cpt2	6.71311e-20	0.763167	0.451	0.061	1.36639e-15	mPRAT-aspc3	Cpt2
Slc1a5	1.01991e-19	1.59814	0.961	0.48	2.07593e-15	mPRAT-aspc3	Slc1a5
Sort1	1.18729e-19	0.900841	0.431	0.057	2.41661e-15	mPRAT-aspc3	Sort1
Txlng	1.87315e-19	1.48636	0.961	0.407	3.81262e-15	mPRAT-aspc3	Txlng
Mdh1	1.9736e-19	0.503004	0.314	0.028	4.01706e-15	mPRAT-aspc3	Mdh1
Entpd6	2.38712e-19	0.40218	0.275	0.02	4.85874e-15	mPRAT-aspc3	Entpd6
Acadl	3.36951e-19	0.996824	0.745	0.174	6.85831e-15	mPRAT-aspc3	Acadl
Sgcd	6.01972e-19	1.46718	0.941	0.373	1.22525e-14	mPRAT-aspc3	Sgcd
Dnajc15	6.19095e-19	0.742559	0.392	0.049	1.26011e-14	mPRAT-aspc3	Dnajc15
Dusp10	7.15214e-19	1.22147	0.431	0.063	1.45575e-14	mPRAT-aspc3	Dusp10
Nudt7	8.08607e-19	0.429741	0.294	0.024	1.64584e-14	mPRAT-aspc3	Nudt7
Mob3b	8.69802e-19	0.842253	0.451	0.066	1.77039e-14	mPRAT-aspc3	Mob3b
C9orf72	9.47638e-19	0.714883	0.431	0.06	1.92882e-14	mPRAT-aspc3	C9orf72
Slc1a31	1.31772e-18	1.57666	0.902	0.303	2.68209e-14	mPRAT-aspc3	Slc1a3
Bckdhb	2.33975e-18	1.38415	0.922	0.349	4.76232e-14	mPRAT-aspc3	Bckdhb
Mapt	3.40268e-18	0.688272	0.255	0.018	6.92581e-14	mPRAT-aspc3	Mapt
Cox19	3.8872e-18	0.466223	0.294	0.026	7.91201e-14	mPRAT-aspc3	Cox19
Kcns3	4.0593e-18	0.448413	0.255	0.018	8.2623e-14	mPRAT-aspc3	Kcns3
Cyth1	4.18008e-18	1.40515	0.824	0.261	8.50814e-14	mPRAT-aspc3	Cyth1
Pus10	7.24188e-18	0.645423	0.569	0.106	1.47401e-13	mPRAT-aspc3	Pus10
Neat1	9.33989e-18	1.55003	0.98	0.725	1.90104e-13	mPRAT-aspc3	Neat1
Aoc3	1.0237e-17	0.673933	0.294	0.028	2.08363e-13	mPRAT-aspc3	Aoc3
Osbpl11	1.18056e-17	1.21142	0.824	0.265	2.40291e-13	mPRAT-aspc3	Osbpl11
Pon3	1.73802e-17	0.793932	0.49	0.083	3.53756e-13	mPRAT-aspc3	Pon3
Hsdl2	2.34004e-17	0.71761	0.373	0.047	4.76292e-13	mPRAT-aspc3	Hsdl2
Stau2	2.56617e-17	0.928124	0.725	0.174	5.22318e-13	mPRAT-aspc3	Stau2
Ghr	3.01455e-17	2.14174	1	0.714	6.13582e-13	mPRAT-aspc3	Ghr
Cecr2	3.65576e-17	1.01091	0.608	0.131	7.44094e-13	mPRAT-aspc3	Cecr2
Akt2	5.50961e-17	0.914654	0.627	0.138	1.12143e-12	mPRAT-aspc3	Akt2
Kctd1	6.02487e-17	0.668802	0.314	0.034	1.2263e-12	mPRAT-aspc3	Kctd1
Sh3pxd2a1	7.01547e-17	1.2336	0.863	0.283	1.42793e-12	mPRAT-aspc3	Sh3pxd2a
Ddhd2	7.46432e-17	1.03473	0.667	0.165	1.51929e-12	mPRAT-aspc3	Ddhd2
Il15ra	7.59099e-17	1.13772	0.745	0.216	1.54507e-12	mPRAT-aspc3	Il15ra
Ptprm	9.9649e-17	1.31675	0.98	0.558	2.02826e-12	mPRAT-aspc3	Ptprm
Thrb	1.36281e-16	1.44612	0.902	0.39	2.77386e-12	mPRAT-aspc3	Thrb
Chst1	2.02791e-16	0.705179	0.314	0.035	4.12761e-12	mPRAT-aspc3	Chst1
Cmbl	2.27259e-16	0.499147	0.275	0.026	4.62564e-12	mPRAT-aspc3	Cmbl
Prkag2	2.32232e-16	1.55154	0.922	0.384	4.72685e-12	mPRAT-aspc3	Prkag2
Dot1l	2.99293e-16	0.61085	0.529	0.102	6.09181e-12	mPRAT-aspc3	Dot1l
Hadha	3.39768e-16	1.13507	0.608	0.148	6.91564e-12	mPRAT-aspc3	Hadha
Cpeb4	3.93943e-16	0.786505	0.725	0.183	8.01831e-12	mPRAT-aspc3	Cpeb4
Ntrk3	4.12795e-16	1.97162	0.863	0.413	8.40204e-12	mPRAT-aspc3	Ntrk3
Cobll1	4.13301e-16	0.816527	0.569	0.121	8.41232e-12	mPRAT-aspc3	Cobll1
Sgk3	4.55678e-16	0.832612	0.529	0.106	9.27487e-12	mPRAT-aspc3	Sgk3
Bcl2l13	4.74e-16	0.819261	0.588	0.128	9.6478e-12	mPRAT-aspc3	Bcl2l13
Tln2	5.06027e-16	0.813079	0.529	0.104	1.02997e-11	mPRAT-aspc3	Tln2
Heph	5.27608e-16	0.701785	0.255	0.023	1.07389e-11	mPRAT-aspc3	Heph
Adcy5	5.28532e-16	1.28311	0.333	0.043	1.07577e-11	mPRAT-aspc3	Adcy5
Pex14	5.51597e-16	1.28005	0.804	0.268	1.12272e-11	mPRAT-aspc3	Pex14
Timm17a	5.59243e-16	0.569585	0.373	0.052	1.13828e-11	mPRAT-aspc3	Timm17a
Mical3	5.85685e-16	1.27207	0.882	0.359	1.1921e-11	mPRAT-aspc3	Mical3
Echdc1	6.96912e-16	0.802521	0.392	0.058	1.4185e-11	mPRAT-aspc3	Echdc1
Tsc22d3	8.46297e-16	0.973748	0.706	0.177	1.72255e-11	mPRAT-aspc3	Tsc22d3
Lpcat3	8.98856e-16	0.766399	0.647	0.148	1.82953e-11	mPRAT-aspc3	Lpcat3
Ltbp3	1.00241e-15	0.796714	0.608	0.13	2.04031e-11	mPRAT-aspc3	Ltbp3
Pitpnm2	1.1426e-15	0.628045	0.569	0.118	2.32564e-11	mPRAT-aspc3	Pitpnm2
Pde4d1	1.43035e-15	1.44322	0.882	0.408	2.91134e-11	mPRAT-aspc3	Pde4d
Abcd2	1.68871e-15	1.41807	0.51	0.113	3.43721e-11	mPRAT-aspc3	Abcd2
Piezo1	1.87159e-15	0.508277	0.471	0.084	3.80943e-11	mPRAT-aspc3	Piezo1
Scp2	2.915e-15	0.561578	0.529	0.102	5.93319e-11	mPRAT-aspc3	Scp2
1600014C10Rik	3.28007e-15	0.612695	0.294	0.034	6.67626e-11	mPRAT-aspc3	1600014C10Rik
Acad10	3.45513e-15	0.550445	0.412	0.066	7.03258e-11	mPRAT-aspc3	Acad10
Rreb1	3.6914e-15	1.46312	0.922	0.443	7.51348e-11	mPRAT-aspc3	Rreb1
Trp53inp2	3.80203e-15	0.402917	0.294	0.034	7.73866e-11	mPRAT-aspc3	Trp53inp2
Me1	3.85097e-15	1.36678	0.608	0.154	7.83826e-11	mPRAT-aspc3	Me1
9330111N05Rik	4.69016e-15	0.627578	0.275	0.029	9.54636e-11	mPRAT-aspc3	9330111N05Rik
Zfp423	4.88796e-15	1.06396	0.725	0.209	9.94895e-11	mPRAT-aspc3	Zfp423
Ptpn14	6.26341e-15	0.735233	0.529	0.11	1.27485e-10	mPRAT-aspc3	Ptpn14
Hadhb	6.89829e-15	1.19603	0.608	0.159	1.40408e-10	mPRAT-aspc3	Hadhb
Pex13	7.70257e-15	0.833915	0.549	0.122	1.56778e-10	mPRAT-aspc3	Pex13
Cox10	8.14492e-15	0.76307	0.49	0.098	1.65782e-10	mPRAT-aspc3	Cox10
Rnf150	9.25405e-15	1.08541	0.549	0.127	1.88357e-10	mPRAT-aspc3	Rnf150
Ganc	9.41271e-15	0.579501	0.412	0.07	1.91586e-10	mPRAT-aspc3	Ganc
Fggy	9.74324e-15	0.719275	0.667	0.162	1.98314e-10	mPRAT-aspc3	Fggy
Ptpn4	1.00017e-14	1.24744	0.745	0.239	2.03574e-10	mPRAT-aspc3	Ptpn4
Mpc1	1.13742e-14	1.09573	0.608	0.162	2.3151e-10	mPRAT-aspc3	Mpc1
Cmtm4	1.46054e-14	0.793569	0.392	0.066	2.97279e-10	mPRAT-aspc3	Cmtm4
Aldoa	1.74889e-14	0.692556	0.392	0.066	3.55969e-10	mPRAT-aspc3	Aldoa
Apoo	1.86314e-14	0.482377	0.255	0.026	3.79224e-10	mPRAT-aspc3	Apoo
Csad	2.13219e-14	0.697499	0.686	0.179	4.33986e-10	mPRAT-aspc3	Csad
Clybl	2.30697e-14	1.063	0.784	0.252	4.69561e-10	mPRAT-aspc3	Clybl
Blcap	3.18042e-14	0.692174	0.471	0.095	6.47343e-10	mPRAT-aspc3	Blcap
Ptk2b	5.2511e-14	0.713396	0.333	0.049	1.06881e-09	mPRAT-aspc3	Ptk2b
Plcb11	5.95014e-14	1.07139	0.824	0.284	1.21109e-09	mPRAT-aspc3	Plcb1
Tmed5	6.68609e-14	0.754215	0.529	0.119	1.36089e-09	mPRAT-aspc3	Tmed5
Crls1	7.31991e-14	0.598396	0.373	0.061	1.48989e-09	mPRAT-aspc3	Crls1
Adhfe1	8.27458e-14	0.923401	0.627	0.165	1.68421e-09	mPRAT-aspc3	Adhfe1
Fas	1.01873e-13	0.623198	0.333	0.05	2.07353e-09	mPRAT-aspc3	Fas
Irak2	1.07071e-13	0.713046	0.549	0.128	2.17932e-09	mPRAT-aspc3	Irak2
Met	1.28482e-13	0.632485	0.392	0.067	2.61513e-09	mPRAT-aspc3	Met
Atp9a	1.45991e-13	0.783611	0.471	0.098	2.97151e-09	mPRAT-aspc3	Atp9a
Ptpa	1.60957e-13	0.732817	0.569	0.139	3.27611e-09	mPRAT-aspc3	Ptpa
Itpr1	1.92609e-13	1.21589	0.804	0.335	3.92036e-09	mPRAT-aspc3	Itpr1
Dbt	2.56729e-13	0.64624	0.294	0.04	5.22546e-09	mPRAT-aspc3	Dbt
Etfdh	3.23805e-13	0.537239	0.392	0.07	6.59073e-09	mPRAT-aspc3	Etfdh
Grina	3.62954e-13	0.772017	0.627	0.167	7.38756e-09	mPRAT-aspc3	Grina
Fbxo45	3.89013e-13	0.498936	0.353	0.057	7.91797e-09	mPRAT-aspc3	Fbxo45
Snx10	3.95644e-13	0.635552	0.686	0.19	8.05295e-09	mPRAT-aspc3	Snx10
Gm26542	4.24372e-13	0.528778	0.373	0.064	8.63768e-09	mPRAT-aspc3	Gm26542
Arhgap26	4.67983e-13	1.11917	0.804	0.309	9.52533e-09	mPRAT-aspc3	Arhgap26
Pakap.11	5.83361e-13	1.51077	0.745	0.3	1.18737e-08	mPRAT-aspc3	Pakap.1
Prkce	5.88614e-13	1.31184	0.961	0.606	1.19806e-08	mPRAT-aspc3	Prkce
Gpr146	7.24519e-13	0.573482	0.255	0.031	1.47469e-08	mPRAT-aspc3	Gpr146
Slc20a2	7.40355e-13	0.761399	0.647	0.179	1.50692e-08	mPRAT-aspc3	Slc20a2
Ptgr2	7.66414e-13	0.411366	0.373	0.064	1.55996e-08	mPRAT-aspc3	Ptgr2
Clmn	8.24212e-13	0.783151	0.412	0.081	1.6776e-08	mPRAT-aspc3	Clmn
Lgals4	9.14916e-13	0.581106	0.353	0.06	1.86222e-08	mPRAT-aspc3	Lgals4
Fam117a	9.72589e-13	0.589193	0.471	0.099	1.97961e-08	mPRAT-aspc3	Fam117a
Dgkd	1.37334e-12	1.26216	0.667	0.234	2.7953e-08	mPRAT-aspc3	Dgkd
Acer2	1.65991e-12	0.410042	0.451	0.092	3.37859e-08	mPRAT-aspc3	Acer2
Nudt4	1.74908e-12	0.505793	0.373	0.066	3.56008e-08	mPRAT-aspc3	Nudt4
Dhrs7b	1.90845e-12	0.438261	0.373	0.067	3.88446e-08	mPRAT-aspc3	Dhrs7b
Coq9	2.04738e-12	0.482384	0.255	0.032	4.16724e-08	mPRAT-aspc3	Coq9
Hspa9	2.08276e-12	0.570608	0.549	0.131	4.23924e-08	mPRAT-aspc3	Hspa9
D5Ertd579e	2.49905e-12	1.06552	0.765	0.306	5.08657e-08	mPRAT-aspc3	D5Ertd579e
Vgll4	3.02706e-12	1.14178	0.902	0.393	6.16127e-08	mPRAT-aspc3	Vgll4
Supv3l1	3.17653e-12	0.314893	0.255	0.032	6.46552e-08	mPRAT-aspc3	Supv3l1
Glul	3.38616e-12	0.8644	0.569	0.157	6.8922e-08	mPRAT-aspc3	Glul
5930430L01Rik	3.71826e-12	0.538079	0.294	0.044	7.56814e-08	mPRAT-aspc3	5930430L01Rik
Vps13a	4.26876e-12	0.896341	0.765	0.257	8.68863e-08	mPRAT-aspc3	Vps13a
Atp5b	4.82102e-12	0.837418	0.471	0.112	9.8127e-08	mPRAT-aspc3	Atp5b
Acot11	5.2326e-12	0.804536	0.255	0.035	1.06504e-07	mPRAT-aspc3	Acot11
Kif21a	5.53466e-12	0.566925	0.353	0.063	1.12652e-07	mPRAT-aspc3	Kif21a
Sema4b	6.22286e-12	0.714637	0.373	0.072	1.2666e-07	mPRAT-aspc3	Sema4b
Chchd3	7.25357e-12	1.24666	0.863	0.466	1.47639e-07	mPRAT-aspc3	Chchd3
Galnt2	9.3191e-12	0.837562	0.706	0.225	1.89681e-07	mPRAT-aspc3	Galnt2
Sod2	9.94859e-12	0.485719	0.431	0.093	2.02494e-07	mPRAT-aspc3	Sod2
Fam210a	1.05805e-11	0.499106	0.412	0.086	2.15355e-07	mPRAT-aspc3	Fam210a
Trit1	1.18214e-11	0.589785	0.431	0.095	2.40612e-07	mPRAT-aspc3	Trit1
Pkm	1.32229e-11	0.529866	0.412	0.087	2.69138e-07	mPRAT-aspc3	Pkm
Cipc	1.40911e-11	0.625514	0.314	0.054	2.86811e-07	mPRAT-aspc3	Cipc
Negr1	1.62055e-11	1.09986	0.961	0.55	3.29847e-07	mPRAT-aspc3	Negr1
Cnot8	1.62468e-11	0.560728	0.314	0.054	3.30688e-07	mPRAT-aspc3	Cnot8
4931406P16Rik	1.65901e-11	0.873737	0.745	0.258	3.37675e-07	mPRAT-aspc3	4931406P16Rik
Atpaf2	1.74346e-11	0.273732	0.275	0.04	3.54863e-07	mPRAT-aspc3	Atpaf2
Slc43a2	1.75504e-11	0.611655	0.255	0.035	3.5722e-07	mPRAT-aspc3	Slc43a2
Cenpv	1.7575e-11	0.488026	0.275	0.041	3.57722e-07	mPRAT-aspc3	Cenpv
Prdm9	2.01861e-11	0.279983	0.275	0.04	4.10867e-07	mPRAT-aspc3	Prdm9
Aamdc	2.47247e-11	0.580059	0.333	0.06	5.03247e-07	mPRAT-aspc3	Aamdc
Eepd1	2.47954e-11	1.50497	0.451	0.115	5.04686e-07	mPRAT-aspc3	Eepd1
Afg1l	2.48054e-11	0.676275	0.627	0.19	5.04889e-07	mPRAT-aspc3	Afg1l
Itga1	2.51444e-11	0.642838	0.549	0.148	5.1179e-07	mPRAT-aspc3	Itga1
4732471J01Rik	2.58949e-11	0.550259	0.588	0.161	5.27065e-07	mPRAT-aspc3	4732471J01Rik
Pank3	2.93796e-11	0.724495	0.471	0.113	5.97993e-07	mPRAT-aspc3	Pank3
Ldhb	3.00729e-11	0.466387	0.294	0.047	6.12103e-07	mPRAT-aspc3	Ldhb
Aldh6a1	3.47655e-11	0.655596	0.431	0.099	7.07616e-07	mPRAT-aspc3	Aldh6a1
Sirt3	4.13236e-11	0.416976	0.373	0.073	8.41101e-07	mPRAT-aspc3	Sirt3
Cavin2	4.30519e-11	0.720771	0.333	0.063	8.76278e-07	mPRAT-aspc3	Cavin2
Nr6a1	4.36386e-11	1.0184	0.627	0.208	8.8822e-07	mPRAT-aspc3	Nr6a1
Mapk6	4.47014e-11	0.668084	0.431	0.101	9.09853e-07	mPRAT-aspc3	Mapk6
Lonp2	4.78743e-11	0.899503	0.863	0.399	9.74433e-07	mPRAT-aspc3	Lonp2
Isoc2a	4.90517e-11	0.744728	0.333	0.064	9.98397e-07	mPRAT-aspc3	Isoc2a
Thap2	4.97175e-11	0.592746	0.49	0.122	1.01195e-06	mPRAT-aspc3	Thap2
Ppm1l	5.0921e-11	0.629803	0.275	0.043	1.03645e-06	mPRAT-aspc3	Ppm1l
Rexo5	5.353e-11	0.338253	0.255	0.037	1.08955e-06	mPRAT-aspc3	Rexo5
G3bp2	5.91594e-11	0.603861	0.471	0.115	1.20413e-06	mPRAT-aspc3	G3bp2
Aste1	5.98364e-11	0.370898	0.255	0.037	1.21791e-06	mPRAT-aspc3	Aste1
2023-03-05	6.18754e-11	0.566263	0.569	0.159	1.25941e-06	mPRAT-aspc3	2023-03-05
Atp5f1	6.55578e-11	0.505922	0.471	0.115	1.33436e-06	mPRAT-aspc3	Atp5f1
Rplp2	7.62888e-11	0.387022	0.333	0.061	1.55278e-06	mPRAT-aspc3	Rplp2
Cbx4	8.24204e-11	0.295674	0.255	0.037	1.67759e-06	mPRAT-aspc3	Cbx4
Mavs	8.39255e-11	0.321663	0.275	0.043	1.70822e-06	mPRAT-aspc3	Mavs
Angpt1	8.63337e-11	0.922373	0.627	0.205	1.75724e-06	mPRAT-aspc3	Angpt1
Vwa8	9.03622e-11	1.21047	0.843	0.428	1.83923e-06	mPRAT-aspc3	Vwa8
Mme	1.0011e-10	0.448845	0.412	0.092	2.03764e-06	mPRAT-aspc3	Mme
Rnf24	1.23622e-10	0.728698	0.451	0.115	2.51621e-06	mPRAT-aspc3	Rnf24
Mettl7a1	1.56375e-10	0.637576	0.549	0.157	3.18286e-06	mPRAT-aspc3	Mettl7a1
Prkaca	1.8045e-10	0.579727	0.373	0.081	3.67287e-06	mPRAT-aspc3	Prkaca
Kif1c	2.03343e-10	0.573932	0.451	0.113	4.13883e-06	mPRAT-aspc3	Kif1c
Ginm1	2.0761e-10	0.470965	0.294	0.052	4.2257e-06	mPRAT-aspc3	Ginm1
Gfm2	2.19528e-10	0.524723	0.569	0.157	4.46828e-06	mPRAT-aspc3	Gfm2
Cebpb	2.26716e-10	0.304878	0.275	0.044	4.61457e-06	mPRAT-aspc3	Cebpb
Esrra	2.27468e-10	0.548828	0.392	0.087	4.62989e-06	mPRAT-aspc3	Esrra
Scarf1	2.71693e-10	0.473485	0.275	0.046	5.53004e-06	mPRAT-aspc3	Scarf1
Bscl2	2.96128e-10	0.473612	0.333	0.066	6.02739e-06	mPRAT-aspc3	Bscl2
Zfp276	2.99954e-10	0.480216	0.275	0.046	6.10527e-06	mPRAT-aspc3	Zfp276
Echdc2	3.63438e-10	0.274729	0.294	0.052	7.39741e-06	mPRAT-aspc3	Echdc2
Pkn1	3.63708e-10	0.890462	0.49	0.138	7.40292e-06	mPRAT-aspc3	Pkn1
Gm16759	3.92715e-10	0.58074	0.392	0.089	7.99332e-06	mPRAT-aspc3	Gm16759
Ifrd1	4.04758e-10	0.789616	0.51	0.15	8.23844e-06	mPRAT-aspc3	Ifrd1
Atp5l	4.05841e-10	0.36745	0.373	0.08	8.26049e-06	mPRAT-aspc3	Atp5l
1110019D14Rik	4.25843e-10	0.655137	0.431	0.109	8.66761e-06	mPRAT-aspc3	1110019D14Rik
6030443J06Rik	4.66754e-10	0.397594	0.373	0.08	9.50031e-06	mPRAT-aspc3	6030443J06Rik
Slc22a5	4.68145e-10	0.797079	0.588	0.191	9.52862e-06	mPRAT-aspc3	Slc22a5
Nol4l	4.73989e-10	0.478803	0.255	0.041	9.64757e-06	mPRAT-aspc3	Nol4l
Samm50	5.13185e-10	0.407982	0.255	0.041	1.04454e-05	mPRAT-aspc3	Samm50
Tbc1d20	5.13956e-10	0.348012	0.412	0.095	1.04611e-05	mPRAT-aspc3	Tbc1d20
Ppp1r9a1	5.29766e-10	0.840624	0.765	0.3	1.07829e-05	mPRAT-aspc3	Ppp1r9a
Dhdh	5.47507e-10	0.559445	0.529	0.148	1.1144e-05	mPRAT-aspc3	Dhdh
Junos	5.85467e-10	0.700809	0.275	0.049	1.19166e-05	mPRAT-aspc3	Junos
Chchd6	6.61782e-10	0.542001	0.529	0.15	1.34699e-05	mPRAT-aspc3	Chchd6
Afg3l2	7.01568e-10	0.677479	0.471	0.128	1.42797e-05	mPRAT-aspc3	Afg3l2
Sugct	7.02558e-10	0.738584	0.647	0.211	1.42999e-05	mPRAT-aspc3	Sugct
Aco1	7.27125e-10	0.741435	0.608	0.202	1.47999e-05	mPRAT-aspc3	Aco1
Syne3	8.69699e-10	0.63211	0.353	0.076	1.77019e-05	mPRAT-aspc3	Syne3
Letm1	8.82898e-10	0.45528	0.275	0.049	1.79705e-05	mPRAT-aspc3	Letm1
N4bp2l1	8.91095e-10	0.581729	0.451	0.118	1.81373e-05	mPRAT-aspc3	N4bp2l1
Gm20732	9.46542e-10	0.539654	0.608	0.193	1.92659e-05	mPRAT-aspc3	Gm20732
Plin2	1.04287e-09	0.75835	0.569	0.187	2.12265e-05	mPRAT-aspc3	Plin2
Mccc2	1.04815e-09	0.510613	0.451	0.118	2.13341e-05	mPRAT-aspc3	Mccc2
Lpl	1.07223e-09	0.997554	0.863	0.454	2.18241e-05	mPRAT-aspc3	Lpl
Cs	1.11697e-09	0.854372	0.529	0.165	2.27348e-05	mPRAT-aspc3	Cs
Lrig1	1.17602e-09	0.443829	0.569	0.17	2.39368e-05	mPRAT-aspc3	Lrig1
Dock5	1.20319e-09	0.450727	0.294	0.057	2.44897e-05	mPRAT-aspc3	Dock5
Dram2	1.35478e-09	0.662758	0.51	0.151	2.75752e-05	mPRAT-aspc3	Dram2
Pdhx	1.37503e-09	0.28362	0.353	0.075	2.79873e-05	mPRAT-aspc3	Pdhx
2700097O09Rik	1.46929e-09	0.565953	0.49	0.136	2.9906e-05	mPRAT-aspc3	2700097O09Rik
Timmdc1	1.69551e-09	0.314787	0.392	0.093	3.45104e-05	mPRAT-aspc3	Timmdc1
Psmd4	1.77766e-09	0.482534	0.412	0.102	3.61825e-05	mPRAT-aspc3	Psmd4
Dcun1d4	1.81087e-09	0.632488	0.373	0.089	3.68584e-05	mPRAT-aspc3	Dcun1d4
Clpb	1.86955e-09	0.392456	0.431	0.109	3.80528e-05	mPRAT-aspc3	Clpb
Stard7	1.87e-09	0.484911	0.471	0.124	3.8062e-05	mPRAT-aspc3	Stard7
Phka2	1.87168e-09	0.607108	0.588	0.196	3.80961e-05	mPRAT-aspc3	Phka2
Fam107b	1.87466e-09	0.264968	0.294	0.055	3.81567e-05	mPRAT-aspc3	Fam107b
Ccdc58	1.93673e-09	0.367642	0.373	0.084	3.94202e-05	mPRAT-aspc3	Ccdc58
Lzts2	2.08941e-09	0.455133	0.451	0.118	4.25278e-05	mPRAT-aspc3	Lzts2
Ap3s1	2.16138e-09	0.747481	0.706	0.271	4.39928e-05	mPRAT-aspc3	Ap3s1
Slc25a46	2.35613e-09	0.486417	0.549	0.164	4.79566e-05	mPRAT-aspc3	Slc25a46
Plgrkt	2.61092e-09	0.44037	0.569	0.17	5.31427e-05	mPRAT-aspc3	Plgrkt
Lin52	2.68383e-09	0.682351	0.627	0.22	5.46267e-05	mPRAT-aspc3	Lin52
Txnl1	2.79356e-09	0.610093	0.451	0.122	5.686e-05	mPRAT-aspc3	Txnl1
Usp49	2.821e-09	0.696363	0.353	0.084	5.74186e-05	mPRAT-aspc3	Usp49
Cables1	2.85997e-09	0.984795	0.588	0.202	5.82118e-05	mPRAT-aspc3	Cables1
Lrp12	3.12028e-09	0.582854	0.412	0.107	6.35103e-05	mPRAT-aspc3	Lrp12
Nars2	3.62763e-09	0.433237	0.431	0.113	7.38367e-05	mPRAT-aspc3	Nars2
Hivep1	3.65629e-09	1.01759	0.647	0.268	7.44202e-05	mPRAT-aspc3	Hivep1
Pdcd11	3.86702e-09	0.260725	0.373	0.087	7.87094e-05	mPRAT-aspc3	Pdcd11
Itpk1	3.92255e-09	0.997277	0.588	0.193	7.98395e-05	mPRAT-aspc3	Itpk1
Agl	4.08445e-09	0.476658	0.51	0.142	8.3135e-05	mPRAT-aspc3	Agl
Arl4a	4.23182e-09	0.34844	0.392	0.096	8.61345e-05	mPRAT-aspc3	Arl4a
Shb	4.29643e-09	0.770817	0.627	0.22	8.74495e-05	mPRAT-aspc3	Shb
Tspo	4.34705e-09	0.266487	0.255	0.044	8.84798e-05	mPRAT-aspc3	Tspo
Rps6ka5	4.67058e-09	0.502947	0.667	0.225	9.5065e-05	mPRAT-aspc3	Rps6ka5
Trps1	4.76536e-09	0.915005	0.725	0.327	9.69942e-05	mPRAT-aspc3	Trps1
Immt	5.09184e-09	0.327981	0.588	0.177	0.000103639	mPRAT-aspc3	Immt
Tfb2m	5.37229e-09	0.427069	0.255	0.046	0.000109348	mPRAT-aspc3	Tfb2m
Chp1	5.48397e-09	0.644528	0.588	0.197	0.000111621	mPRAT-aspc3	Chp1
Pex5	5.58086e-09	0.617824	0.373	0.093	0.000113593	mPRAT-aspc3	Pex5
Nat10	6.60225e-09	0.404076	0.314	0.067	0.000134382	mPRAT-aspc3	Nat10
Pdzrn3	7.06433e-09	0.785736	0.647	0.243	0.000143787	mPRAT-aspc3	Pdzrn3
Mrs2	7.37606e-09	0.351646	0.353	0.083	0.000150132	mPRAT-aspc3	Mrs2
Cdip1	7.93632e-09	0.743095	0.647	0.237	0.000161536	mPRAT-aspc3	Cdip1
Zfp976	8.58419e-09	0.387121	0.294	0.06	0.000174723	mPRAT-aspc3	Zfp976
Abhd5	8.83275e-09	0.772326	0.451	0.133	0.000179782	mPRAT-aspc3	Abhd5
Sucla2	9.13118e-09	0.688646	0.51	0.161	0.000185856	mPRAT-aspc3	Sucla2
Gm26944	9.28967e-09	0.347052	0.314	0.067	0.000189082	mPRAT-aspc3	Gm26944
Phtf2	9.69462e-09	0.487103	0.353	0.086	0.000197324	mPRAT-aspc3	Phtf2
9330159M07Rik	1.04022e-08	0.309935	0.314	0.067	0.000211726	mPRAT-aspc3	9330159M07Rik
Ank	1.05121e-08	0.648014	0.529	0.173	0.000213964	mPRAT-aspc3	Ank
Dcakd	1.07748e-08	0.413282	0.412	0.107	0.00021931	mPRAT-aspc3	Dcakd
Ube2q2	1.12615e-08	0.587892	0.51	0.159	0.000229217	mPRAT-aspc3	Ube2q2
Bfar	1.25034e-08	0.622779	0.49	0.148	0.000254494	mPRAT-aspc3	Bfar
Cog4	1.3209e-08	0.458966	0.529	0.164	0.000268856	mPRAT-aspc3	Cog4
Msra	1.32958e-08	0.730585	0.529	0.174	0.000270623	mPRAT-aspc3	Msra
Abhd10	1.38165e-08	0.259203	0.255	0.047	0.000281221	mPRAT-aspc3	Abhd10
Oip5os1	1.39538e-08	0.577753	0.51	0.165	0.000284016	mPRAT-aspc3	Oip5os1
Abhd6	1.54216e-08	0.380508	0.392	0.101	0.000313891	mPRAT-aspc3	Abhd6
Cpeb3	1.63091e-08	0.843898	0.765	0.353	0.000331956	mPRAT-aspc3	Cpeb3
Mrps6	1.69071e-08	0.431954	0.412	0.112	0.000344127	mPRAT-aspc3	Mrps6
Ptcd3	1.74926e-08	0.483519	0.549	0.176	0.000356045	mPRAT-aspc3	Ptcd3
Nfyc	1.7579e-08	0.652835	0.706	0.286	0.000357803	mPRAT-aspc3	Nfyc
Fhit	1.8105e-08	0.82804	0.863	0.437	0.00036851	mPRAT-aspc3	Fhit
Mtss11	1.8291e-08	0.672698	0.843	0.388	0.000372295	mPRAT-aspc3	Mtss1
Epb41l1	1.83829e-08	0.517159	0.667	0.249	0.000374165	mPRAT-aspc3	Epb41l1
Mfsd8	1.85827e-08	0.279185	0.314	0.069	0.000378232	mPRAT-aspc3	Mfsd8
Rcl1	1.87097e-08	0.389276	0.392	0.101	0.000380818	mPRAT-aspc3	Rcl1
Itpr2	1.94998e-08	1.0167	0.922	0.523	0.000396898	mPRAT-aspc3	Itpr2
Ifi27	1.96596e-08	0.278891	0.353	0.084	0.000400151	mPRAT-aspc3	Ifi27
Ppm1b	2.03854e-08	0.621473	0.686	0.272	0.000414924	mPRAT-aspc3	Ppm1b
Phyhd1	2.08837e-08	0.341271	0.412	0.109	0.000425067	mPRAT-aspc3	Phyhd1
Efna51	2.09857e-08	0.713672	0.843	0.405	0.000427143	mPRAT-aspc3	Efna5
2023-09-09	2.10749e-08	0.930902	0.529	0.183	0.000428958	mPRAT-aspc3	2023-09-09
Shld2	2.15878e-08	0.46927	0.353	0.084	0.000439399	mPRAT-aspc3	Shld2
Ccl25	2.28804e-08	0.545476	0.471	0.136	0.000465707	mPRAT-aspc3	Ccl25
Ap1b1	2.39992e-08	0.293644	0.294	0.063	0.000488481	mPRAT-aspc3	Ap1b1
Vipas39	2.41074e-08	0.367621	0.314	0.07	0.000490683	mPRAT-aspc3	Vipas39
Slc18b1	2.50722e-08	0.334899	0.294	0.063	0.00051032	mPRAT-aspc3	Slc18b1
Kansl2	2.63526e-08	0.365629	0.471	0.136	0.00053638	mPRAT-aspc3	Kansl2
Larp4	2.66845e-08	0.620961	0.588	0.214	0.000543137	mPRAT-aspc3	Larp4
Decr1	2.71313e-08	0.354126	0.392	0.102	0.000552231	mPRAT-aspc3	Decr1
Cdk6	2.80092e-08	0.705816	0.373	0.098	0.000570099	mPRAT-aspc3	Cdk6
Acly	2.94722e-08	1.06742	0.471	0.159	0.000599876	mPRAT-aspc3	Acly
Ldah	3.02768e-08	0.440117	0.608	0.206	0.000616254	mPRAT-aspc3	Ldah
Snhg11	3.0409e-08	0.435702	0.333	0.08	0.000618945	mPRAT-aspc3	Snhg11
Arhgap5	3.13161e-08	0.629741	0.686	0.269	0.000637407	mPRAT-aspc3	Arhgap5
Vamp1	3.14709e-08	0.293738	0.275	0.057	0.000640558	mPRAT-aspc3	Vamp1
Usp38	3.21949e-08	0.4517	0.353	0.087	0.000655295	mPRAT-aspc3	Usp38
Tsacc	3.25953e-08	0.468808	0.275	0.058	0.000663444	mPRAT-aspc3	Tsacc
Naa40	3.33405e-08	0.258748	0.314	0.07	0.000678613	mPRAT-aspc3	Naa40
Fktn	3.393e-08	0.326918	0.373	0.095	0.000690611	mPRAT-aspc3	Fktn
Ctdspl	3.47383e-08	0.692235	0.784	0.362	0.000707064	mPRAT-aspc3	Ctdspl
Tor1aip2	3.51594e-08	0.446673	0.51	0.161	0.000715635	mPRAT-aspc3	Tor1aip2
Uqcrc2	3.54101e-08	0.481398	0.431	0.128	0.000720736	mPRAT-aspc3	Uqcrc2
Resf1	3.57344e-08	0.742526	0.667	0.274	0.000727338	mPRAT-aspc3	Resf1
Psma6	3.64545e-08	0.348687	0.333	0.08	0.000741996	mPRAT-aspc3	Psma6
2810403D21Rik	3.64732e-08	0.476593	0.412	0.113	0.000742375	mPRAT-aspc3	2810403D21Rik
Ap4m1	3.72385e-08	0.464478	0.255	0.052	0.000757953	mPRAT-aspc3	Ap4m1
Caprin1	3.90396e-08	0.777877	0.804	0.365	0.000794613	mPRAT-aspc3	Caprin1
Pmm2	3.93866e-08	0.401891	0.412	0.112	0.000801675	mPRAT-aspc3	Pmm2
Gm17276	3.95448e-08	0.416014	0.392	0.104	0.000804894	mPRAT-aspc3	Gm17276
Hacl1	3.97432e-08	0.317394	0.333	0.08	0.000808933	mPRAT-aspc3	Hacl1
Cry2	4.20885e-08	0.454534	0.373	0.099	0.00085667	mPRAT-aspc3	Cry2
G6pdx	4.64744e-08	0.281015	0.333	0.08	0.000945941	mPRAT-aspc3	G6pdx
Ddx24	4.68329e-08	0.368628	0.451	0.13	0.000953236	mPRAT-aspc3	Ddx24
Pdpr	4.91777e-08	0.449112	0.353	0.09	0.00100096	mPRAT-aspc3	Pdpr
Lmtk2	5.11584e-08	0.434829	0.529	0.17	0.00104128	mPRAT-aspc3	Lmtk2
Tomm70a	5.3365e-08	0.305017	0.549	0.174	0.00108619	mPRAT-aspc3	Tomm70a
Mapkapk2	5.8806e-08	0.58914	0.529	0.176	0.00119694	mPRAT-aspc3	Mapkapk2
Arel1	5.9074e-08	0.514866	0.392	0.11	0.00120239	mPRAT-aspc3	Arel1
Eif4ebp1	6.03972e-08	0.388288	0.255	0.052	0.00122932	mPRAT-aspc3	Eif4ebp1
Nrp21	6.33053e-08	0.773112	0.569	0.216	0.00128852	mPRAT-aspc3	Nrp2
Galnt18	6.78651e-08	0.389675	0.373	0.101	0.00138133	mPRAT-aspc3	Galnt18
Slc25a26	6.85299e-08	0.398656	0.353	0.092	0.00139486	mPRAT-aspc3	Slc25a26
Flcn	6.88169e-08	0.653676	0.333	0.086	0.0014007	mPRAT-aspc3	Flcn
Txndc12	7.02563e-08	0.312804	0.353	0.089	0.00143	mPRAT-aspc3	Txndc12
Mgst1	7.26675e-08	0.630602	0.451	0.136	0.00147907	mPRAT-aspc3	Mgst1
Abhd12	7.50737e-08	0.305671	0.392	0.107	0.00152805	mPRAT-aspc3	Abhd12
Oxct1	7.57243e-08	0.569928	0.627	0.232	0.00154129	mPRAT-aspc3	Oxct1
Acbd4	7.75178e-08	0.378925	0.333	0.083	0.0015778	mPRAT-aspc3	Acbd4
Ndufv2	7.95628e-08	0.544927	0.431	0.133	0.00161942	mPRAT-aspc3	Ndufv2
Gramd1a	8.28517e-08	0.490016	0.49	0.157	0.00168636	mPRAT-aspc3	Gramd1a
Sdhc	8.42524e-08	0.328111	0.333	0.083	0.00171487	mPRAT-aspc3	Sdhc
Pcca	8.67002e-08	0.715355	0.765	0.359	0.0017647	mPRAT-aspc3	Pcca
Tpk1	9.40477e-08	0.642939	0.412	0.125	0.00191425	mPRAT-aspc3	Tpk1
Gde1	9.53594e-08	0.385569	0.255	0.054	0.00194094	mPRAT-aspc3	Gde1
Angptl4	9.60086e-08	0.591339	0.451	0.145	0.00195416	mPRAT-aspc3	Angptl4
Ndufb3	9.60227e-08	0.332041	0.294	0.067	0.00195445	mPRAT-aspc3	Ndufb3
Enpp2	9.98171e-08	0.730458	0.608	0.228	0.00203168	mPRAT-aspc3	Enpp2
2023-03-02	1.00119e-07	0.468964	0.431	0.125	0.00203783	mPRAT-aspc3	2023-03-02
Rnh1	1.00213e-07	0.332121	0.333	0.083	0.00203974	mPRAT-aspc3	Rnh1
2610507B11Rik	1.01835e-07	0.553923	0.471	0.15	0.00207276	mPRAT-aspc3	2610507B11Rik
Kctd3	1.05348e-07	0.36196	0.431	0.125	0.00214425	mPRAT-aspc3	Kctd3
Apmap	1.12453e-07	0.268501	0.255	0.052	0.00228887	mPRAT-aspc3	Apmap
Dglucy	1.15014e-07	0.328223	0.333	0.084	0.00234099	mPRAT-aspc3	Dglucy
Map4k3	1.15898e-07	0.640728	0.824	0.394	0.00235898	mPRAT-aspc3	Map4k3
Brd3	1.16773e-07	0.28345	0.451	0.133	0.00237679	mPRAT-aspc3	Brd3
Pgm1	1.20069e-07	0.593856	0.51	0.176	0.00244389	mPRAT-aspc3	Pgm1
Chka	1.23223e-07	0.316004	0.392	0.11	0.00250809	mPRAT-aspc3	Chka
Dnajc5	1.24643e-07	0.469018	0.569	0.203	0.00253699	mPRAT-aspc3	Dnajc5
Acaa2	1.25765e-07	0.675212	0.431	0.135	0.00255981	mPRAT-aspc3	Acaa2
Dld	1.27621e-07	0.294788	0.333	0.084	0.00259759	mPRAT-aspc3	Dld
Tef	1.28421e-07	0.57496	0.765	0.333	0.00261389	mPRAT-aspc3	Tef
Gpi1	1.41017e-07	0.56333	0.49	0.164	0.00287026	mPRAT-aspc3	Gpi1
Nhsl2	1.54869e-07	0.640008	0.49	0.17	0.0031522	mPRAT-aspc3	Nhsl2
Derl1	1.56982e-07	0.390432	0.431	0.13	0.00319521	mPRAT-aspc3	Derl1
Cant1	1.63731e-07	0.436169	0.275	0.061	0.00333258	mPRAT-aspc3	Cant1
Cpeb2	1.71537e-07	0.314654	0.353	0.093	0.00349146	mPRAT-aspc3	Cpeb2
Znrf1	1.71937e-07	0.793334	0.647	0.266	0.00349961	mPRAT-aspc3	Znrf1
Dag1	1.77694e-07	0.659932	0.667	0.294	0.00361679	mPRAT-aspc3	Dag1
Myo18a	1.84033e-07	0.363538	0.294	0.07	0.00374581	mPRAT-aspc3	Myo18a
Alkbh8	1.85159e-07	0.37966	0.353	0.096	0.00376872	mPRAT-aspc3	Alkbh8
Gfod2	1.88426e-07	0.527728	0.314	0.08	0.00383522	mPRAT-aspc3	Gfod2
Prkd11	1.90156e-07	0.82043	0.804	0.42	0.00387044	mPRAT-aspc3	Prkd1
Med20	1.93568e-07	0.311006	0.275	0.063	0.00393988	mPRAT-aspc3	Med20
Pgrmc2	1.95174e-07	0.452336	0.275	0.063	0.00397258	mPRAT-aspc3	Pgrmc2
Eipr1	2.07273e-07	0.332033	0.314	0.078	0.00421884	mPRAT-aspc3	Eipr1
Opa1	2.08018e-07	0.545049	0.647	0.248	0.00423399	mPRAT-aspc3	Opa1
Coq3	2.10421e-07	0.443387	0.314	0.078	0.00428291	mPRAT-aspc3	Coq3
St3gal6	2.26266e-07	0.661772	0.333	0.09	0.00460541	mPRAT-aspc3	St3gal6
Lmbrd2	2.27632e-07	0.257648	0.392	0.11	0.00463321	mPRAT-aspc3	Lmbrd2
Pkp2	2.28377e-07	0.611189	0.255	0.058	0.00464839	mPRAT-aspc3	Pkp2
Ints4	2.3046e-07	0.316186	0.353	0.095	0.00469078	mPRAT-aspc3	Ints4
Stk11	2.33309e-07	0.255065	0.549	0.182	0.00474877	mPRAT-aspc3	Stk11
Lhfpl2	2.33501e-07	0.618924	0.314	0.083	0.00475267	mPRAT-aspc3	Lhfpl2
Abcd3	2.43971e-07	0.841019	0.725	0.343	0.00496578	mPRAT-aspc3	Abcd3
Tspan14	2.59415e-07	0.449693	0.451	0.145	0.00528014	mPRAT-aspc3	Tspan14
Gatb	2.61254e-07	0.353136	0.294	0.072	0.00531756	mPRAT-aspc3	Gatb
Kri1	2.62544e-07	0.358858	0.255	0.057	0.00534383	mPRAT-aspc3	Kri1
Cdc27	2.62862e-07	0.491186	0.608	0.226	0.00535029	mPRAT-aspc3	Cdc27
Prkn	2.64681e-07	0.682348	0.902	0.621	0.00538732	mPRAT-aspc3	Prkn
Mbp	2.67536e-07	0.267783	0.314	0.078	0.00544542	mPRAT-aspc3	Mbp
Dnajc14	2.80889e-07	0.401109	0.275	0.064	0.00571722	mPRAT-aspc3	Dnajc14
Sbno2	2.89993e-07	0.372878	0.431	0.133	0.00590251	mPRAT-aspc3	Sbno2
Ywhab	2.90449e-07	0.540586	0.49	0.17	0.0059118	mPRAT-aspc3	Ywhab
Mtx2	2.96695e-07	0.378951	0.431	0.135	0.00603892	mPRAT-aspc3	Mtx2
1600020E01Rik	2.98685e-07	0.335518	0.412	0.124	0.00607943	mPRAT-aspc3	1600020E01Rik
Smu1	3.04542e-07	0.390524	0.275	0.064	0.00619865	mPRAT-aspc3	Smu1
Eif5b	3.23526e-07	0.417876	0.51	0.171	0.00658505	mPRAT-aspc3	Eif5b
Ccdc138	3.27952e-07	0.26157	0.333	0.087	0.00667514	mPRAT-aspc3	Ccdc138
Timm9	3.4066e-07	0.541285	0.333	0.09	0.0069338	mPRAT-aspc3	Timm9
Nedd4l	3.43844e-07	0.823329	0.843	0.535	0.0069986	mPRAT-aspc3	Nedd4l
Akap7	3.47841e-07	0.602025	0.667	0.291	0.00707995	mPRAT-aspc3	Akap7
Bcap31	3.4931e-07	0.348885	0.471	0.151	0.00710986	mPRAT-aspc3	Bcap31
Map2k3	3.73186e-07	0.318581	0.353	0.096	0.00759582	mPRAT-aspc3	Map2k3
Fam234a	3.76835e-07	0.480257	0.431	0.136	0.0076701	mPRAT-aspc3	Fam234a
Urb1	3.84523e-07	0.265573	0.275	0.064	0.00782658	mPRAT-aspc3	Urb1
Pcgf5	3.88686e-07	0.583171	0.588	0.22	0.00791131	mPRAT-aspc3	Pcgf5
Lman2	3.97169e-07	0.371459	0.294	0.073	0.00808398	mPRAT-aspc3	Lman2
Fam49b	3.97622e-07	0.492982	0.51	0.179	0.0080932	mPRAT-aspc3	Fam49b
Cpped1	4.04226e-07	0.374661	0.451	0.144	0.00822762	mPRAT-aspc3	Cpped1
Cep250	4.0629e-07	0.539353	0.333	0.092	0.00826962	mPRAT-aspc3	Cep250
Orc2	4.0693e-07	0.270816	0.353	0.098	0.00828266	mPRAT-aspc3	Orc2
Vcl	4.09759e-07	0.603933	0.588	0.24	0.00834024	mPRAT-aspc3	Vcl
1700012D14Rik	4.27243e-07	0.422681	0.49	0.162	0.0086961	mPRAT-aspc3	1700012D14Rik
Coq5	4.55086e-07	0.328634	0.294	0.073	0.00926282	mPRAT-aspc3	Coq5
Stx18	4.60764e-07	0.448522	0.608	0.222	0.00937839	mPRAT-aspc3	Stx18
Msl2	4.64468e-07	0.38248	0.608	0.225	0.00945378	mPRAT-aspc3	Msl2
Ranbp3	4.72603e-07	0.382738	0.333	0.09	0.00961936	mPRAT-aspc3	Ranbp3
1700086O06Rik	4.74781e-07	0.254605	0.255	0.057	0.0096637	mPRAT-aspc3	1700086O06Rik
Gm269171	4.91913e-07	0.740865	1	0.726	0.0100124	mPRAT-aspc3	Gm26917
Naa20	4.9715e-07	0.406506	0.392	0.116	0.010119	mPRAT-aspc3	Naa20
Deptor	5.03198e-07	0.663403	0.824	0.393	0.0102421	mPRAT-aspc3	Deptor
Mpp7	5.21623e-07	0.802278	0.667	0.321	0.0106171	mPRAT-aspc3	Mpp7
Chd4	5.21771e-07	0.550992	0.804	0.365	0.0106201	mPRAT-aspc3	Chd4
Zranb3	5.28495e-07	0.57749	0.255	0.058	0.010757	mPRAT-aspc3	Zranb3
Ogdh	5.35291e-07	0.953659	0.647	0.31	0.0108953	mPRAT-aspc3	Ogdh
Ncbp1	5.36627e-07	0.466545	0.294	0.075	0.0109225	mPRAT-aspc3	Ncbp1
Zfp467	5.53333e-07	0.300097	0.294	0.073	0.0112625	mPRAT-aspc3	Zfp467
Pde4dip	5.75028e-07	0.356542	0.412	0.124	0.0117041	mPRAT-aspc3	Pde4dip
Prkacb	5.88881e-07	0.452587	0.529	0.193	0.0119861	mPRAT-aspc3	Prkacb
Acyp2	6.31665e-07	0.677823	0.824	0.434	0.0128569	mPRAT-aspc3	Acyp2
Ube4a	6.392e-07	0.384856	0.569	0.208	0.0130103	mPRAT-aspc3	Ube4a
Kif13a	6.44922e-07	0.560684	0.686	0.298	0.0131267	mPRAT-aspc3	Kif13a
Ecd	6.56691e-07	0.287908	0.314	0.083	0.0133663	mPRAT-aspc3	Ecd
Eif4g2	6.77027e-07	0.489891	0.549	0.202	0.0137802	mPRAT-aspc3	Eif4g2
Med27	6.90746e-07	0.257162	0.569	0.2	0.0140595	mPRAT-aspc3	Med27
Stk38l	7.08842e-07	0.418593	0.314	0.086	0.0144278	mPRAT-aspc3	Stk38l
Fam162a	7.37808e-07	0.35331	0.294	0.075	0.0150173	mPRAT-aspc3	Fam162a
Pygb	7.3817e-07	0.371633	0.392	0.121	0.0150247	mPRAT-aspc3	Pygb
Acat1	7.72919e-07	0.444594	0.549	0.203	0.015732	mPRAT-aspc3	Acat1
Fign	7.7828e-07	0.547206	0.647	0.268	0.0158411	mPRAT-aspc3	Fign
Utrn1	7.90456e-07	0.658666	0.961	0.716	0.0160889	mPRAT-aspc3	Utrn
Mir22hg	7.91973e-07	0.264595	0.412	0.128	0.0161198	mPRAT-aspc3	Mir22hg
Ctnnbl1	8.10977e-07	0.368146	0.451	0.147	0.0165066	mPRAT-aspc3	Ctnnbl1
Ndufaf4	8.20609e-07	0.51181	0.255	0.061	0.0167027	mPRAT-aspc3	Ndufaf4
Oxr1	8.2291e-07	0.48728	0.588	0.225	0.0167495	mPRAT-aspc3	Oxr1
Ice2	8.28802e-07	0.293446	0.353	0.099	0.0168694	mPRAT-aspc3	Ice2
Flvcr1	8.56719e-07	0.463309	0.255	0.06	0.0174377	mPRAT-aspc3	Flvcr1
Qtrt2	9.68146e-07	0.36789	0.294	0.076	0.0197056	mPRAT-aspc3	Qtrt2
Ssbp1	1.01182e-06	0.321283	0.353	0.101	0.0205945	mPRAT-aspc3	Ssbp1
Wipi2	1.01671e-06	0.573661	0.431	0.147	0.0206942	mPRAT-aspc3	Wipi2
Zfp219	1.03322e-06	0.338624	0.294	0.076	0.0210302	mPRAT-aspc3	Zfp219
Luc7l2	1.04581e-06	0.603864	0.98	0.806	0.0212865	mPRAT-aspc3	Luc7l2
Clic4	1.14437e-06	0.507915	0.588	0.239	0.0232925	mPRAT-aspc3	Clic4
Eif2s1	1.24685e-06	0.445842	0.353	0.106	0.0253783	mPRAT-aspc3	Eif2s1
Pwwp3a	1.26406e-06	0.277774	0.412	0.13	0.0257287	mPRAT-aspc3	Pwwp3a
Ell	1.3101e-06	0.300675	0.49	0.167	0.0266658	mPRAT-aspc3	Ell
Rpe	1.33615e-06	0.38479	0.353	0.106	0.027196	mPRAT-aspc3	Rpe
Qk	1.36678e-06	0.638468	0.941	0.685	0.0278194	mPRAT-aspc3	Qk
Ccdc25	1.40272e-06	0.411844	0.255	0.063	0.028551	mPRAT-aspc3	Ccdc25
Vkorc1l1	1.44212e-06	0.444117	0.667	0.271	0.0293528	mPRAT-aspc3	Vkorc1l1
Ubxn7	1.46863e-06	0.622128	0.608	0.242	0.0298924	mPRAT-aspc3	Ubxn7
Syap1	1.48393e-06	0.305311	0.392	0.122	0.0302039	mPRAT-aspc3	Syap1
Pald1	1.52411e-06	0.768216	0.373	0.122	0.0310218	mPRAT-aspc3	Pald1
Safb2	1.54346e-06	0.642402	0.667	0.292	0.0314157	mPRAT-aspc3	Safb2
Whamm	1.57443e-06	0.397707	0.333	0.095	0.032046	mPRAT-aspc3	Whamm
Slc30a9	1.58552e-06	0.541772	0.627	0.274	0.0322716	mPRAT-aspc3	Slc30a9
Smad2	1.64157e-06	0.436885	0.647	0.257	0.0334124	mPRAT-aspc3	Smad2
Msrb3	1.70576e-06	0.662258	0.667	0.307	0.034719	mPRAT-aspc3	Msrb3
Atg12	1.73231e-06	0.286219	0.294	0.078	0.0352594	mPRAT-aspc3	Atg12
Secisbp2l	1.81058e-06	0.272555	0.529	0.185	0.0368526	mPRAT-aspc3	Secisbp2l
Cul2	1.86349e-06	0.288517	0.353	0.104	0.0379295	mPRAT-aspc3	Cul2
Nadk	1.89715e-06	0.481542	0.549	0.214	0.0386146	mPRAT-aspc3	Nadk
G0s2	1.97089e-06	0.301316	0.275	0.07	0.0401155	mPRAT-aspc3	G0s2
9530026P05Rik1	1.98091e-06	0.329631	0.843	0.404	0.0403194	mPRAT-aspc3	9530026P05Rik
Alas1	2.00339e-06	0.512841	0.353	0.106	0.0407769	mPRAT-aspc3	Alas1
Kpna6	2.05091e-06	0.376443	0.314	0.089	0.0417442	mPRAT-aspc3	Kpna6
Carf	2.08489e-06	0.356342	0.333	0.098	0.0424359	mPRAT-aspc3	Carf
Eif4g1	2.15851e-06	0.604321	0.765	0.37	0.0439344	mPRAT-aspc3	Eif4g1
Fam193b	2.16104e-06	0.500671	0.706	0.31	0.0439858	mPRAT-aspc3	Fam193b
Carnmt1	2.26949e-06	0.510254	0.314	0.093	0.0461932	mPRAT-aspc3	Carnmt1
Osbpl2	2.27078e-06	0.300849	0.373	0.116	0.0462194	mPRAT-aspc3	Osbpl2
Otulin	2.3827e-06	0.279908	0.333	0.096	0.0484974	mPRAT-aspc3	Otulin
Agmo	2.38769e-06	0.516791	0.941	0.586	0.048599	mPRAT-aspc3	Agmo
Patl1	2.39067e-06	0.422222	0.373	0.119	0.0486597	mPRAT-aspc3	Patl1
Krcc1	2.39371e-06	0.401735	0.471	0.171	0.0487215	mPRAT-aspc3	Krcc1
Rad54l2	2.44874e-06	0.321906	0.49	0.176	0.0498416	mPRAT-aspc3	Rad54l2

## Sheet: iBAT
	p_val	avg_log2FC	pct.1	pct.2	p_val_adj	cluster	gene
Egfr	0	4.85127	0.903	0.015	0	ASPC	Egfr
Lama2	0	4.69431	0.893	0.008	0	ASPC	Lama2
Plxdc2	0	4.64904	0.908	0.033	0	ASPC	Plxdc2
Arhgap6	0	4.06166	0.839	0.034	0	ASPC	Arhgap6
Zfpm2	0	3.83243	0.816	0.032	0	ASPC	Zfpm2
Naaladl2	0	3.73316	0.668	0.006	0	ASPC	Naaladl2
Meg3	0	3.72514	0.74	0.022	0	ASPC	Meg3
Abca8a	0	3.70218	0.699	0.03	0	ASPC	Abca8a
Slit3	0	3.69539	0.901	0.135	0	ASPC	Slit3
Gsn	0	3.63908	0.711	0.04	0	ASPC	Gsn
Col15a1	0	3.62231	0.611	0.009	0	ASPC	Col15a1
Bicc1	0	3.61632	0.765	0.009	0	ASPC	Bicc1
Col3a1	0	3.59893	0.689	0.01	0	ASPC	Col3a1
Tmeff2	0	3.58563	0.61	0.002	0	ASPC	Tmeff2
Thsd7a	0	3.54786	0.599	0.005	0	ASPC	Thsd7a
Col6a3	0	3.54571	0.713	0.012	0	ASPC	Col6a3
Gpc6	0	3.54363	0.565	0.011	0	ASPC	Gpc6
Lsamp	0	3.42547	0.396	0.009	0	ASPC	Lsamp
Timp3	0	3.36621	0.593	0.065	0	ASPC	Timp3
Rhoj	0	3.36288	0.735	0.038	0	ASPC	Rhoj
Bmper	0	3.23241	0.734	0.157	0	ASPC	Bmper
Col5a3	0	3.21705	0.637	0.015	0	ASPC	Col5a3
Magi2	0	3.17265	0.62	0.049	0	ASPC	Magi2
Auts2	0	3.17191	0.782	0.081	0	ASPC	Auts2
Ror1	0	3.1642	0.647	0.015	0	ASPC	Ror1
Col1a2	0	3.15841	0.623	0.004	0	ASPC	Col1a2
Pcdh7	0	3.13833	0.672	0.042	0	ASPC	Pcdh7
Col5a2	0	3.03988	0.648	0.019	0	ASPC	Col5a2
Smoc2	0	3.03362	0.519	0.002	0	ASPC	Smoc2
Wipf1	0	3.03052	0.683	0.035	0	ASPC	Wipf1
Pde11a	0	3.00295	0.354	0.002	0	ASPC	Pde11a
Col5a1	0	2.96397	0.644	0.011	0	ASPC	Col5a1
Rbms3	0	2.96357	0.79	0.105	0	ASPC	Rbms3
Creb5	0	2.9222	0.287	0.013	0	ASPC	Creb5
Fbn1	0	2.91863	0.463	0.01	0	ASPC	Fbn1
Lhfp	0	2.89728	0.618	0.033	0	ASPC	Lhfp
Dcn	0	2.8603	0.567	0.001	0	ASPC	Dcn
Frmd4b	0	2.85526	0.599	0.027	0	ASPC	Frmd4b
Tcf7l1	0	2.84346	0.801	0.193	0	ASPC	Tcf7l1
Ddr2	0	2.84312	0.608	0.017	0	ASPC	Ddr2
Tshz2	0	2.81332	0.868	0.154	0	ASPC	Tshz2
Nav1	0	2.7952	0.741	0.077	0	ASPC	Nav1
Gli3	0	2.7888	0.583	0.01	0	ASPC	Gli3
Adamtsl1	0	2.74166	0.51	0.006	0	ASPC	Adamtsl1
Sdk1	0	2.73178	0.282	0.004	0	ASPC	Sdk1
Srgap1	0	2.72708	0.534	0.034	0	ASPC	Srgap1
Ltbp1	0	2.71623	0.522	0.007	0	ASPC	Ltbp1
Gpm6b	0	2.71105	0.414	0.001	0	ASPC	Gpm6b
Fndc1	0	2.69061	0.399	0.001	0	ASPC	Fndc1
Fap	0	2.6739	0.516	0.011	0	ASPC	Fap
Frmd6	0	2.62528	0.517	0.016	0	ASPC	Frmd6
Nova1	0	2.59086	0.425	0.017	0	ASPC	Nova1
Eya2	0	2.56103	0.489	0.01	0	ASPC	Eya2
Adam23	0	2.55121	0.481	0.012	0	ASPC	Adam23
Zfp521	0	2.54998	0.55	0.031	0	ASPC	Zfp521
Csgalnact1	0	2.546	0.527	0.053	0	ASPC	Csgalnact1
Rian	0	2.54221	0.469	0.011	0	ASPC	Rian
Trerf1	0	2.52187	0.504	0.012	0	ASPC	Trerf1
Adamts12	0	2.5121	0.592	0.133	0	ASPC	Adamts12
Scara5	0	2.48511	0.391	0.001	0	ASPC	Scara5
Nckap5	0	2.47202	0.511	0.043	0	ASPC	Nckap5
Plpp3	0	2.46577	0.582	0.103	0	ASPC	Plpp3
Cyth3	0	2.44617	0.573	0.09	0	ASPC	Cyth3
Dclk1	0	2.42666	0.404	0.001	0	ASPC	Dclk1
Tshz3	0	2.41316	0.517	0.025	0	ASPC	Tshz3
Mrc2	0	2.40775	0.496	0.022	0	ASPC	Mrc2
Fkbp5	0	2.39568	0.649	0.117	0	ASPC	Fkbp5
Mast4	0	2.38376	0.848	0.388	0	ASPC	Mast4
Aldh1a1	0	2.37141	0.468	0.027	0	ASPC	Aldh1a1
Nid1	0	2.36838	0.504	0.03	0	ASPC	Nid1
Adamts5	0	2.36664	0.355	0.017	0	ASPC	Adamts5
Colec12	0	2.34231	0.377	0.009	0	ASPC	Colec12
Tnxb	0	2.33577	0.593	0.024	0	ASPC	Tnxb
Fbxl7	0	2.33462	0.564	0.048	0	ASPC	Fbxl7
Fndc3b	0	2.32954	0.862	0.341	0	ASPC	Fndc3b
Errfi1	0	2.31749	0.343	0.029	0	ASPC	Errfi1
Lvrn	0	2.31673	0.362	0.001	0	ASPC	Lvrn
Nav3	0	2.31529	0.525	0.112	0	ASPC	Nav3
Sulf1	0	2.29793	0.481	0.024	0	ASPC	Sulf1
Astn2	0	2.28771	0.367	0.013	0	ASPC	Astn2
Dpep1	0	2.28552	0.434	0.017	0	ASPC	Dpep1
Il1r1	0	2.27177	0.458	0.016	0	ASPC	Il1r1
Maml2	0	2.24941	0.765	0.219	0	ASPC	Maml2
Tbx15	0	2.2448	0.51	0.038	0	ASPC	Tbx15
Mid1	0	2.22517	0.778	0.315	0	ASPC	Mid1
Glis3	0	2.22172	0.39	0.011	0	ASPC	Glis3
Pdgfra	0	2.21716	0.403	0.001	0	ASPC	Pdgfra
Antxr1	0	2.20058	0.414	0.007	0	ASPC	Antxr1
Sec24d	0	2.17437	0.556	0.075	0	ASPC	Sec24d
Robo1	0	2.16257	0.308	0.006	0	ASPC	Robo1
Slc9a9	0	2.14755	0.447	0.013	0	ASPC	Slc9a9
Fstl1	0	2.1467	0.394	0.013	0	ASPC	Fstl1
Cacna2d1	0	2.12526	0.568	0.1	0	ASPC	Cacna2d1
Col1a1	0	2.12252	0.32	0.001	0	ASPC	Col1a1
Antxr2	0	2.11943	0.519	0.099	0	ASPC	Antxr2
Eps8	0	2.11161	0.478	0.029	0	ASPC	Eps8
Aff2	0	2.07927	0.338	0.008	0	ASPC	Aff2
Ifi207	0	2.07804	0.398	0.004	0	ASPC	Ifi207
Man1a	0	2.07792	0.375	0.042	0	ASPC	Man1a
B3galt1	0	2.07358	0.363	0.019	0	ASPC	B3galt1
Sdc2	0	2.0671	0.452	0.07	0	ASPC	Sdc2
Col6a2	0	2.05142	0.37	0.003	0	ASPC	Col6a2
Gulp1	0	2.03732	0.533	0.088	0	ASPC	Gulp1
Frmd4a	0	2.02671	0.419	0.024	0	ASPC	Frmd4a
Ntf3	0	2.02425	0.371	0.018	0	ASPC	Ntf3
Akt3	0	2.01789	0.481	0.034	0	ASPC	Akt3
Grb10	0	2.00734	0.417	0.036	0	ASPC	Grb10
Slc7a11	0	2.00281	0.321	0.009	0	ASPC	Slc7a11
Dennd2a	0	2.00137	0.391	0.015	0	ASPC	Dennd2a
Prrx1	0	1.96609	0.335	0.03	0	ASPC	Prrx1
Spon1	0	1.94611	0.284	0.008	0	ASPC	Spon1
Asap1	0	1.94434	0.812	0.415	0	ASPC	Asap1
Lpar1	0	1.92979	0.336	0.002	0	ASPC	Lpar1
Pappa	0	1.89838	0.271	0.01	0	ASPC	Pappa
Gucy1a2	0	1.89725	0.362	0.02	0	ASPC	Gucy1a2
Fyn	0	1.89271	0.414	0.031	0	ASPC	Fyn
Enox1	0	1.87952	0.464	0.072	0	ASPC	Enox1
Klf12	0	1.87187	0.377	0.026	0	ASPC	Klf12
Celf2	0	1.87146	0.985	0.854	0	ASPC	Celf2
Adamts2	0	1.86223	0.386	0.039	0	ASPC	Adamts2
Morrbid	0	1.85921	0.316	0.017	0	ASPC	Morrbid
Adam19	0	1.85684	0.333	0.015	0	ASPC	Adam19
Kirrel	0	1.85516	0.436	0.051	0	ASPC	Kirrel
Eif4g3	0	1.85283	0.728	0.299	0	ASPC	Eif4g3
Fmnl2	0	1.83301	0.513	0.135	0	ASPC	Fmnl2
Sh3d19	0	1.80182	0.467	0.081	0	ASPC	Sh3d19
Pdgfrb	0	1.79919	0.367	0.021	0	ASPC	Pdgfrb
Atp8b1	0	1.79053	0.322	0.01	0	ASPC	Atp8b1
Medag	0	1.77488	0.293	0.002	0	ASPC	Medag
Elmo1	0	1.76434	0.419	0.036	0	ASPC	Elmo1
Prdm5	0	1.75481	0.347	0.009	0	ASPC	Prdm5
Clmp	0	1.75374	0.312	0.012	0	ASPC	Clmp
Chsy3	0	1.75174	0.279	0.018	0	ASPC	Chsy3
Prickle2	0	1.75043	0.382	0.05	0	ASPC	Prickle2
Slc43a3	0	1.73871	0.322	0.011	0	ASPC	Slc43a3
Hspg2	0	1.73123	0.581	0.16	0	ASPC	Hspg2
Dnm1	0	1.72263	0.314	0.002	0	ASPC	Dnm1
Cp	0	1.72072	0.276	0.022	0	ASPC	Cp
Asap3	0	1.71895	0.317	0.017	0	ASPC	Asap3
Airn	0	1.71811	0.918	0.568	0	ASPC	Airn
Bcl2	0	1.71715	0.31	0.032	0	ASPC	Bcl2
Boc	0	1.71178	0.28	0.009	0	ASPC	Boc
Abca8b	0	1.70497	0.253	0.007	0	ASPC	Abca8b
Sobp	0	1.70454	0.322	0.024	0	ASPC	Sobp
Gli2	0	1.6928	0.316	0.034	0	ASPC	Gli2
Arhgap10	0	1.69115	0.542	0.151	0	ASPC	Arhgap10
Col6a1	0	1.68984	0.302	0.005	0	ASPC	Col6a1
Man1c1	0	1.68067	0.324	0.019	0	ASPC	Man1c1
Sh3rf3	0	1.67806	0.301	0.027	0	ASPC	Sh3rf3
Slc8a1	0	1.67041	0.265	0.022	0	ASPC	Slc8a1
Plcl1	0	1.66829	0.456	0.055	0	ASPC	Plcl1
Hdac7	0	1.66741	0.359	0.027	0	ASPC	Hdac7
App	0	1.6623	0.504	0.104	0	ASPC	App
Pcdh19	0	1.65552	0.258	0.013	0	ASPC	Pcdh19
Fam114a1	0	1.65522	0.367	0.034	0	ASPC	Fam114a1
Cmip	0	1.62736	0.375	0.055	0	ASPC	Cmip
Runx1t1	0	1.60773	0.259	0.005	0	ASPC	Runx1t1
Slco3a1	0	1.60637	0.271	0.028	0	ASPC	Slco3a1
Coro2b	0	1.60409	0.315	0.023	0	ASPC	Coro2b
Map1b	0	1.58818	0.261	0.027	0	ASPC	Map1b
Apba1	0	1.5565	0.253	0.011	0	ASPC	Apba1
Htra3	0	1.55134	0.333	0.044	0	ASPC	Htra3
Slc41a2	0	1.55075	0.295	0.016	0	ASPC	Slc41a2
Abca9	0	1.5501	0.25	0.005	0	ASPC	Abca9
Osmr	0	1.54369	0.291	0.014	0	ASPC	Osmr
2023-09-11	0	1.52404	0.342	0.055	0	ASPC	2023-09-11
Slfn5	0	1.51409	0.338	0.026	0	ASPC	Slfn5
Arhgap28	0	1.51272	0.262	0.01	0	ASPC	Arhgap28
Axl	0	1.48687	0.251	0.005	0	ASPC	Axl
Mcc	0	1.48433	0.354	0.032	0	ASPC	Mcc
Mill2	0	1.48348	0.286	0.012	0	ASPC	Mill2
Lrrk1	0	1.48142	0.31	0.026	0	ASPC	Lrrk1
Scn7a	0	1.48104	0.334	0.056	0	ASPC	Scn7a
Pld1	0	1.47512	0.288	0.02	0	ASPC	Pld1
Sh3pxd2b	0	1.4704	0.275	0.016	0	ASPC	Sh3pxd2b
2023-09-08	0	1.44426	0.281	0.015	0	ASPC	2023-09-08
Bmp1	0	1.43557	0.273	0.013	0	ASPC	Bmp1
Mrvi1	0	1.42407	0.276	0.022	0	ASPC	Mrvi1
Sp100	0	1.42318	0.284	0.026	0	ASPC	Sp100
Tspan9	0	1.41857	0.302	0.043	0	ASPC	Tspan9
Prkg1	0	1.40993	0.579	0.041	0	ASPC	Prkg1
Vav3	0	1.37039	0.282	0.03	0	ASPC	Vav3
Parp8	0	1.36974	0.281	0.025	0	ASPC	Parp8
Cald1	0	1.3574	0.339	0.037	0	ASPC	Cald1
Kalrn	0	1.32251	0.292	0.04	0	ASPC	Kalrn
Flna	0	1.31011	0.253	0.017	0	ASPC	Flna
Stard9	0	1.26488	0.254	0.021	0	ASPC	Stard9
Pde10a	0	1.23004	0.302	0.034	0	ASPC	Pde10a
Ldb2	0	1.18005	0.263	0.03	0	ASPC	Ldb2
Cacna1c	0	0.941601	0.28	0.03	0	ASPC	Cacna1c
Ust	1.68229e-305	1.94539	0.623	0.213	3.05807e-301	ASPC	Ust
Cdk14	6.74977e-299	1.79377	0.703	0.286	1.22697e-294	ASPC	Cdk14
Tspan5	1.15482e-298	1.93222	0.464	0.115	2.09923e-294	ASPC	Tspan5
Abi3bp	2.29252e-291	1.83568	0.423	0.099	4.16735e-287	ASPC	Abi3bp
Sash1	2.56507e-288	1.60497	0.502	0.135	4.66278e-284	ASPC	Sash1
Stxbp6	4.63745e-278	1.37092	0.251	0.034	8.42995e-274	ASPC	Stxbp6
Tnik	1.17643e-277	1.46753	0.326	0.059	2.13852e-273	ASPC	Tnik
Gab2	1.02007e-271	1.86844	0.677	0.281	1.85429e-267	ASPC	Gab2
Dcbld2	2.60563e-270	1.38828	0.283	0.046	4.73651e-266	ASPC	Dcbld2
Col4a1	2.69101e-262	2.11953	0.704	0.314	4.89171e-258	ASPC	Col4a1
Lima1	1.79078e-253	1.63863	0.481	0.139	3.25528e-249	ASPC	Lima1
Mir99ahg	2.35523e-250	1.54618	0.862	0.585	4.28134e-246	ASPC	Mir99ahg
Igfbp7	4.52862e-250	1.21502	0.291	0.05	8.23212e-246	ASPC	Igfbp7
Lamc1	1.191e-249	1.75949	0.73	0.363	2.16501e-245	ASPC	Lamc1
Rora	3.09598e-244	1.2111	0.982	0.896	5.62787e-240	ASPC	Rora
Srgap2	4.48395e-244	1.50232	0.508	0.157	8.15092e-240	ASPC	Srgap2
Sparc	2.23159e-243	1.45754	0.446	0.12	4.05658e-239	ASPC	Sparc
Dapk1	1.27237e-240	1.74432	0.487	0.147	2.31291e-236	ASPC	Dapk1
Peak1	3.57218e-240	1.71089	0.657	0.286	6.4935e-236	ASPC	Peak1
Psd3	2.8771e-239	1.52183	0.608	0.228	5.22999e-235	ASPC	Psd3
Samd4	9.56569e-239	1.45921	0.359	0.08	1.73885e-234	ASPC	Samd4
Rbms1	6.57358e-238	1.40776	0.9	0.65	1.19494e-233	ASPC	Rbms1
Igf1r	1.72952e-235	1.59456	0.537	0.179	3.14393e-231	ASPC	Igf1r
St5	2.02823e-234	1.38057	0.393	0.097	3.68692e-230	ASPC	St5
Sema5a	3.64913e-231	1.34193	0.258	0.044	6.63339e-227	ASPC	Sema5a
Svil	1.86599e-227	1.5796	0.574	0.213	3.39199e-223	ASPC	Svil
Tcf4	6.65023e-227	1.51926	0.799	0.487	1.20888e-222	ASPC	Tcf4
Sned1	1.23181e-225	1.61184	0.329	0.073	2.23918e-221	ASPC	Sned1
Rasa3	1.08929e-219	1.54882	0.342	0.079	1.98012e-215	ASPC	Rasa3
Atp2b4	7.69469e-219	1.2435	0.257	0.045	1.39874e-214	ASPC	Atp2b4
Pard3b	2.35596e-210	1.40761	0.787	0.458	4.28266e-206	ASPC	Pard3b
Smad3	2.29723e-200	1.86195	0.569	0.234	4.17591e-196	ASPC	Smad3
Pam	1.38585e-198	1.33804	0.354	0.09	2.5192e-194	ASPC	Pam
Arhgap24	2.36316e-196	1.25691	0.93	0.803	4.29574e-192	ASPC	Arhgap24
Klhl29	2.24315e-195	1.45272	0.285	0.061	4.0776e-191	ASPC	Klhl29
Tanc2	7.59759e-194	1.18404	0.258	0.05	1.38109e-189	ASPC	Tanc2
Sntb2	1.9354e-193	1.4846	0.47	0.16	3.51818e-189	ASPC	Sntb2
Ar	2.55958e-191	1.31844	0.288	0.064	4.6528e-187	ASPC	Ar
Ebf1	6.40852e-189	1.02838	0.979	0.92	1.16494e-184	ASPC	Ebf1
Dlc1	1.47034e-186	0.97677	0.963	0.85	2.67278e-182	ASPC	Dlc1
Zbtb16	5.95329e-181	1.57719	0.821	0.498	1.08219e-176	ASPC	Zbtb16
Plekha5	2.37152e-179	1.48585	0.527	0.215	4.31095e-175	ASPC	Plekha5
Rrbp1	8.63933e-179	1.38323	0.629	0.302	1.57046e-174	ASPC	Rrbp1
Dlgap4	2.42318e-175	1.31428	0.421	0.138	4.40486e-171	ASPC	Dlgap4
Map4	4.92505e-172	1.19244	0.486	0.176	8.95276e-168	ASPC	Map4
Cep112	1.06442e-169	1.25818	0.317	0.083	1.93489e-165	ASPC	Cep112
Pbx1	1.1879e-169	1.46321	0.751	0.487	2.15936e-165	ASPC	Pbx1
Sptbn1	7.54767e-168	0.968456	0.869	0.67	1.37201e-163	ASPC	Sptbn1
Gls	3.00831e-162	1.21359	0.383	0.121	5.46851e-158	ASPC	Gls
Ccnd3	5.98852e-160	1.14131	0.257	0.058	1.08859e-155	ASPC	Ccnd3
Zbtb20	7.13322e-159	0.699859	0.99	0.97	1.29668e-154	ASPC	Zbtb20
Apbb2	2.87115e-154	0.960787	0.363	0.107	5.21918e-150	ASPC	Apbb2
Ece1	4.64752e-153	1.24153	0.377	0.122	8.44826e-149	ASPC	Ece1
Lpp	1.24441e-152	1.10202	0.812	0.576	2.26209e-148	ASPC	Lpp
Taok3	9.22118e-152	1.16298	0.368	0.116	1.67623e-147	ASPC	Taok3
Gmds	3.4186e-150	1.31418	0.341	0.103	6.21433e-146	ASPC	Gmds
Gm12216	1.9216e-148	1.13286	0.285	0.075	3.49308e-144	ASPC	Gm12216
Adamtsl3	5.38623e-145	1.47907	0.484	0.199	9.79108e-141	ASPC	Adamtsl3
Arhgap42	1.56393e-144	1.24919	0.377	0.127	2.84291e-140	ASPC	Arhgap42
Spred1	6.37273e-144	1.19337	0.347	0.109	1.15844e-139	ASPC	Spred1
Maml3	1.73049e-141	1.09224	0.547	0.249	3.14569e-137	ASPC	Maml3
Cacna1a	7.56309e-141	1.41564	0.451	0.183	1.37482e-136	ASPC	Cacna1a
Aff1	1.18866e-139	1.30159	0.571	0.286	2.16075e-135	ASPC	Aff1
Zcchc24	1.4585e-137	1.26207	0.482	0.205	2.65127e-133	ASPC	Zcchc24
Fam129a	7.90859e-128	1.19047	0.39	0.145	1.43762e-123	ASPC	Fam129a
Man2a1	1.53696e-127	1.63697	0.476	0.219	2.79388e-123	ASPC	Man2a1
Tcf7l2	3.14575e-126	1.11759	0.716	0.455	5.71834e-122	ASPC	Tcf7l2
Rgl1	3.52101e-122	1.04183	0.305	0.095	6.4005e-118	ASPC	Rgl1
Col4a2	2.25862e-118	1.38628	0.625	0.368	4.10572e-114	ASPC	Col4a2
Ehbp1	3.95334e-115	1.2467	0.612	0.373	7.18638e-111	ASPC	Ehbp1
Zeb2	9.01616e-115	0.967128	0.827	0.62	1.63896e-110	ASPC	Zeb2
Ext1	1.41799e-114	1.16337	0.776	0.566	2.57762e-110	ASPC	Ext1
Klf7	2.57e-114	1.03433	0.293	0.092	4.67175e-110	ASPC	Klf7
Sbf2	1.89118e-112	1.11985	0.596	0.339	3.43779e-108	ASPC	Sbf2
Lims1	1.10697e-111	1.15399	0.489	0.236	2.01226e-107	ASPC	Lims1
Adamts10	3.05968e-108	1.03513	0.273	0.086	5.56188e-104	ASPC	Adamts10
Zeb1	3.3113e-105	0.954057	0.886	0.781	6.01927e-101	ASPC	Zeb1
Map4k4	5.12297e-104	1.06702	0.606	0.364	9.31253e-100	ASPC	Map4k4
Setbp1	7.04225e-103	1.1693	0.606	0.36	1.28014e-98	ASPC	Setbp1
Prkca	1.46922e-101	1.24053	0.484	0.242	2.67074e-97	ASPC	Prkca
Dip2c	2.51777e-100	1.03246	0.674	0.436	4.57681e-96	ASPC	Dip2c
Disp1	3.3067e-100	1.00115	0.256	0.081	6.01092e-96	ASPC	Disp1
Lifr	2.45858e-99	1.27493	0.376	0.16	4.46921e-95	ASPC	Lifr
Mpdz	2.92186e-99	1.08995	0.416	0.188	5.31135e-95	ASPC	Mpdz
Stag1	9.38009e-99	1.03915	0.658	0.433	1.70511e-94	ASPC	Stag1
Nbea	1.59678e-97	1.04608	0.458	0.217	2.90262e-93	ASPC	Nbea
Ccser1	2.7745e-96	1.08392	0.355	0.143	5.04349e-92	ASPC	Ccser1
Ube2e2	1.99164e-93	0.919076	0.798	0.635	3.62041e-89	ASPC	Ube2e2
St3gal1	1.48838e-92	1.01815	0.277	0.097	2.70558e-88	ASPC	St3gal1
Tgfbr3	2.04315e-92	0.98452	0.726	0.536	3.71404e-88	ASPC	Tgfbr3
Dock1	1.17283e-91	0.956463	0.633	0.41	2.13196e-87	ASPC	Dock1
Acap2	1.38188e-90	1.04357	0.484	0.257	2.51198e-86	ASPC	Acap2
Creb3l2	1.60565e-90	1.12106	0.316	0.124	2.91876e-86	ASPC	Creb3l2
Lrp1	6.40717e-90	0.995251	0.518	0.283	1.1647e-85	ASPC	Lrp1
Ppfibp1	5.863e-89	0.931732	0.302	0.113	1.06578e-84	ASPC	Ppfibp1
Bnc2	4.13767e-88	1.28765	0.392	0.183	7.52146e-84	ASPC	Bnc2
Nfib	6.4766e-88	0.798411	0.884	0.786	1.17732e-83	ASPC	Nfib
Pten	1.16702e-87	1.03811	0.627	0.422	2.12141e-83	ASPC	Pten
Ahnak	1.28721e-86	0.959909	0.576	0.339	2.33989e-82	ASPC	Ahnak
Dnajc1	1.62711e-86	0.98579	0.589	0.366	2.95775e-82	ASPC	Dnajc1
Ank2	4.11754e-86	0.921276	0.797	0.649	7.48486e-82	ASPC	Ank2
Epb41l2	1.21143e-84	0.930517	0.647	0.436	2.20214e-80	ASPC	Epb41l2
Myo9a	3.9218e-83	1.03633	0.406	0.194	7.12906e-79	ASPC	Myo9a
Ptk2	1.12798e-82	0.890844	0.488	0.261	2.05044e-78	ASPC	Ptk2
Zfp592	3.02242e-82	1.05455	0.416	0.206	5.49416e-78	ASPC	Zfp592
Cpq	3.93379e-78	0.91689	0.636	0.429	7.15083e-74	ASPC	Cpq
Fgfr1	7.37311e-76	1.01678	0.4	0.199	1.34028e-71	ASPC	Fgfr1
Xdh	3.56056e-75	0.932106	0.389	0.19	6.47238e-71	ASPC	Xdh
Ttc28	3.91854e-74	0.840469	0.642	0.429	7.12312e-70	ASPC	Ttc28
Phldb1	4.88177e-74	0.840105	0.343	0.153	8.87409e-70	ASPC	Phldb1
Esyt2	1.15801e-73	0.921492	0.549	0.343	2.10503e-69	ASPC	Esyt2
Clint1	2.70985e-70	0.955229	0.468	0.27	4.92597e-66	ASPC	Clint1
Nfix	1.19809e-69	0.829986	0.608	0.408	2.17788e-65	ASPC	Nfix
Parva	1.29127e-68	0.875389	0.452	0.246	2.34728e-64	ASPC	Parva
Zfand3	4.0461e-68	0.722125	0.764	0.617	7.35499e-64	ASPC	Zfand3
Tsc22d1	5.5474e-67	0.885747	0.301	0.129	1.00841e-62	ASPC	Tsc22d1
P4ha1	1.87199e-66	0.968749	0.295	0.128	3.4029e-62	ASPC	P4ha1
Malat1	4.83796e-64	0.369957	1	0.999	8.79445e-60	ASPC	Malat1
Pkd2	6.56689e-64	0.845142	0.324	0.15	1.19373e-59	ASPC	Pkd2
Wasf2	1.25375e-63	0.845809	0.397	0.209	2.27907e-59	ASPC	Wasf2
Exoc6b	1.04696e-60	0.859237	0.566	0.388	1.90316e-56	ASPC	Exoc6b
Kif13b	1.47261e-60	0.867752	0.466	0.282	2.67691e-56	ASPC	Kif13b
Arhgap21	2.8123e-60	0.904851	0.488	0.303	5.11219e-56	ASPC	Arhgap21
St3gal4	2.17795e-57	0.868015	0.33	0.163	3.95908e-53	ASPC	St3gal4
Magi1	5.44101e-55	0.563419	0.324	0.155	9.89067e-51	ASPC	Magi1
Stk3	2.65467e-54	0.809399	0.499	0.321	4.82567e-50	ASPC	Stk3
Cuedc1	4.04405e-54	0.847891	0.364	0.194	7.35127e-50	ASPC	Cuedc1
Zfhx4	5.06483e-54	0.721787	0.721	0.572	9.20684e-50	ASPC	Zfhx4
Cep170	1.95628e-53	0.831887	0.375	0.208	3.55613e-49	ASPC	Cep170
Rock2	2.41413e-53	0.80641	0.577	0.405	4.38841e-49	ASPC	Rock2
Ttc3	4.38268e-53	0.853394	0.456	0.283	7.96684e-49	ASPC	Ttc3
Fam49a	6.04878e-53	0.931805	0.387	0.22	1.09955e-48	ASPC	Fam49a
Atrnl1	6.15765e-53	0.788666	0.672	0.52	1.11934e-48	ASPC	Atrnl1
Copa	2.3156e-52	0.78885	0.424	0.254	4.2093e-48	ASPC	Copa
Rab2a	6.42727e-51	0.79812	0.421	0.253	1.16835e-46	ASPC	Rab2a
Ski	1.36285e-50	0.742457	0.545	0.368	2.47739e-46	ASPC	Ski
Slc44a1	5.99463e-50	0.806829	0.332	0.175	1.0897e-45	ASPC	Slc44a1
Scmh1	7.49007e-50	0.792385	0.339	0.18	1.36154e-45	ASPC	Scmh1
Ptpn12	8.2114e-50	0.836164	0.383	0.22	1.49267e-45	ASPC	Ptpn12
Eda	3.0647e-49	0.884699	0.634	0.476	5.57102e-45	ASPC	Eda
Pde3a	3.93445e-49	0.803143	0.437	0.256	7.15205e-45	ASPC	Pde3a
Eps15	8.46929e-49	0.799781	0.378	0.216	1.53955e-44	ASPC	Eps15
Dennd1a	3.60891e-48	0.672994	0.675	0.549	6.56028e-44	ASPC	Dennd1a
Ssbp2	7.5022e-48	0.807087	0.55	0.4	1.36375e-43	ASPC	Ssbp2
Fbxw8	1.21512e-47	0.799182	0.38	0.22	2.20885e-43	ASPC	Fbxw8
Mitf	1.06541e-46	0.899222	0.447	0.288	1.93671e-42	ASPC	Mitf
Spaca6	7.16222e-46	0.68756	0.28	0.137	1.30195e-41	ASPC	Spaca6
Atxn10	2.14807e-45	0.742395	0.31	0.163	3.90477e-41	ASPC	Atxn10
Smurf2	6.75281e-45	0.81327	0.423	0.269	1.22753e-40	ASPC	Smurf2
Klf9	1.37077e-44	0.861947	0.45	0.287	2.49179e-40	ASPC	Klf9
Snd1	2.74929e-44	0.698829	0.509	0.348	4.99765e-40	ASPC	Snd1
Arl15	1.35702e-43	0.643531	0.739	0.63	2.4668e-39	ASPC	Arl15
Pkd1	4.01845e-43	0.72924	0.336	0.187	7.30473e-39	ASPC	Pkd1
Jak1	8.5054e-43	0.739194	0.447	0.292	1.54611e-38	ASPC	Jak1
Stim2	9.66958e-43	0.704849	0.255	0.122	1.75774e-38	ASPC	Stim2
Fer	1.05694e-42	0.799906	0.433	0.283	1.92131e-38	ASPC	Fer
Agap1	1.81838e-41	0.832068	0.466	0.315	3.30545e-37	ASPC	Agap1
Prickle1	1.99448e-41	1.01803	0.251	0.125	3.62556e-37	ASPC	Prickle1
Gnaq	3.48028e-41	0.643431	0.616	0.48	6.32646e-37	ASPC	Gnaq
Farp1	5.51837e-41	0.751295	0.374	0.224	1.00313e-36	ASPC	Farp1
Spred2	6.0273e-41	0.697948	0.362	0.207	1.09564e-36	ASPC	Spred2
Ssh2	8.51023e-41	0.719828	0.588	0.448	1.54699e-36	ASPC	Ssh2
Arhgap35	9.27084e-41	0.729173	0.386	0.235	1.68525e-36	ASPC	Arhgap35
Cask	6.61821e-39	0.772117	0.354	0.214	1.20306e-34	ASPC	Cask
Chd9	1.09077e-38	0.515961	0.833	0.784	1.9828e-34	ASPC	Chd9
Ano6	1.596e-38	0.626898	0.548	0.396	2.90121e-34	ASPC	Ano6
Stk24	2.48878e-38	0.739208	0.286	0.155	4.5241e-34	ASPC	Stk24
Ppp2r3a	2.88783e-38	0.73747	0.483	0.341	5.24949e-34	ASPC	Ppp2r3a
Zc3h7a	6.46066e-38	0.730734	0.354	0.212	1.17442e-33	ASPC	Zc3h7a
Rsu1	8.89589e-38	0.69899	0.382	0.236	1.61709e-33	ASPC	Rsu1
Zhx3	1.11165e-37	0.744173	0.455	0.316	2.02076e-33	ASPC	Zhx3
Mcu	1.1374e-37	0.78513	0.41	0.266	2.06756e-33	ASPC	Mcu
Ascc3	1.15436e-37	0.769411	0.362	0.224	2.0984e-33	ASPC	Ascc3
Fam172a	1.23201e-37	0.685319	0.594	0.468	2.23955e-33	ASPC	Fam172a
Tnrc6c	1.42423e-37	0.635203	0.528	0.391	2.58896e-33	ASPC	Tnrc6c
Prrc2b	3.3129e-37	0.668665	0.278	0.147	6.02219e-33	ASPC	Prrc2b
Lrch1	5.98945e-37	0.667864	0.271	0.142	1.08876e-32	ASPC	Lrch1
Mosmo	1.08246e-35	0.69782	0.257	0.136	1.9677e-31	ASPC	Mosmo
Sp3	5.79246e-35	0.666952	0.329	0.195	1.05295e-30	ASPC	Sp3
Arf4	1.1674e-34	0.843792	0.305	0.181	2.1221e-30	ASPC	Arf4
Itgb1	4.96999e-34	0.688345	0.29	0.165	9.03444e-30	ASPC	Itgb1
Trio	4.99181e-33	0.66605	0.534	0.406	9.07411e-29	ASPC	Trio
Crtc3	5.21039e-33	0.650707	0.311	0.184	9.47144e-29	ASPC	Crtc3
Atp6v0a1	6.70063e-33	0.786601	0.365	0.239	1.21804e-28	ASPC	Atp6v0a1
Meis2	1.27315e-32	0.72724	0.444	0.307	2.31432e-28	ASPC	Meis2
Uvrag	1.37161e-32	0.610036	0.425	0.287	2.49332e-28	ASPC	Uvrag
Dennd1b	3.68194e-32	0.642887	0.356	0.224	6.69303e-28	ASPC	Dennd1b
Mrtfa	6.43843e-32	0.654941	0.404	0.269	1.17038e-27	ASPC	Mrtfa
Cyfip1	7.94202e-32	0.65263	0.267	0.148	1.4437e-27	ASPC	Cyfip1
Ndfip1	2.27083e-31	0.716055	0.266	0.151	4.12792e-27	ASPC	Ndfip1
Phf21a	2.92513e-31	0.549908	0.623	0.518	5.3173e-27	ASPC	Phf21a
Daam1	4.2623e-31	0.704595	0.332	0.207	7.74801e-27	ASPC	Daam1
Dock4	5.85107e-31	0.900856	0.381	0.251	1.06361e-26	ASPC	Dock4
Acvr2a	6.28279e-31	0.817173	0.36	0.238	1.14209e-26	ASPC	Acvr2a
Nfkb1	7.45929e-31	0.688408	0.364	0.235	1.35595e-26	ASPC	Nfkb1
Peli2	1.01671e-30	0.613338	0.462	0.329	1.84817e-26	ASPC	Peli2
Mir100hg	1.2706e-30	0.54276	0.645	0.51	2.3097e-26	ASPC	Mir100hg
Bbs9	1.79926e-30	0.637042	0.261	0.145	3.27069e-26	ASPC	Bbs9
Mbd2	2.89399e-30	0.557375	0.287	0.166	5.2607e-26	ASPC	Mbd2
Sec31a	3.01861e-30	0.697617	0.402	0.279	5.48724e-26	ASPC	Sec31a
Ptpra	6.59504e-30	0.652615	0.332	0.209	1.19885e-25	ASPC	Ptpra
Dok6	7.43981e-30	0.901399	0.272	0.159	1.35241e-25	ASPC	Dok6
Add3	1.01504e-29	0.709773	0.5	0.38	1.84513e-25	ASPC	Add3
Foxo3	1.27133e-29	0.691267	0.324	0.2	2.31103e-25	ASPC	Foxo3
Pid1	2.14686e-29	0.739128	0.45	0.324	3.90257e-25	ASPC	Pid1
Tanc1	2.22437e-29	0.491039	0.288	0.166	4.04346e-25	ASPC	Tanc1
Map3k3	3.14655e-29	0.680423	0.307	0.187	5.7198e-25	ASPC	Map3k3
Diaph2	3.8426e-29	0.528264	0.672	0.575	6.98509e-25	ASPC	Diaph2
Zbtb46	4.11775e-29	0.606365	0.265	0.152	7.48525e-25	ASPC	Zbtb46
Ksr1	6.69493e-29	0.681415	0.352	0.224	1.21701e-24	ASPC	Ksr1
Plce1	1.65174e-28	0.895509	0.285	0.173	3.00254e-24	ASPC	Plce1
Nfat5	2.1151e-27	0.624901	0.498	0.39	3.84484e-23	ASPC	Nfat5
Akap13	4.95896e-27	0.487227	0.691	0.62	9.01439e-23	ASPC	Akap13
Eri3	5.65553e-27	0.659623	0.438	0.327	1.02806e-22	ASPC	Eri3
Arhgap32	7.76685e-27	0.676334	0.373	0.256	1.41186e-22	ASPC	Arhgap32
Tnrc18	4.54658e-26	0.599633	0.255	0.148	8.26477e-22	ASPC	Tnrc18
Slc23a2	9.19399e-26	0.559939	0.254	0.148	1.67128e-21	ASPC	Slc23a2
Meis1	1.24799e-25	0.702494	0.286	0.178	2.26859e-21	ASPC	Meis1
Myh9	3.52677e-25	0.539907	0.272	0.164	6.41096e-21	ASPC	Myh9
Heg1	9.15098e-25	0.613776	0.511	0.398	1.66347e-20	ASPC	Heg1
Glg1	1.85841e-24	0.612252	0.325	0.213	3.37822e-20	ASPC	Glg1
Rasal2	3.02028e-24	0.463446	0.333	0.216	5.49026e-20	ASPC	Rasal2
Stxbp5	4.05975e-24	0.605088	0.297	0.191	7.37982e-20	ASPC	Stxbp5
Dip2b	5.00555e-24	0.596777	0.302	0.192	9.09909e-20	ASPC	Dip2b
Tnpo1	6.58088e-24	0.614616	0.36	0.248	1.19627e-19	ASPC	Tnpo1
Tut4	6.6811e-24	0.551102	0.308	0.198	1.21449e-19	ASPC	Tut4
Atp2b1	3.0432e-23	0.570413	0.304	0.197	5.53192e-19	ASPC	Atp2b1
Btrc	3.91136e-23	0.580911	0.372	0.263	7.11007e-19	ASPC	Btrc
Dock7	1.27032e-22	0.561743	0.333	0.226	2.30919e-18	ASPC	Dock7
Ywhae	2.10788e-22	0.584995	0.325	0.219	3.83171e-18	ASPC	Ywhae
Ptpn9	2.53601e-22	0.555105	0.28	0.177	4.60997e-18	ASPC	Ptpn9
Fto	4.08742e-22	0.441963	0.709	0.64	7.4301e-18	ASPC	Fto
Nf1	9.02746e-22	0.515195	0.533	0.438	1.64101e-17	ASPC	Nf1
Hnrnph1	1.21938e-21	0.490891	0.487	0.381	2.21658e-17	ASPC	Hnrnph1
Nrip1	2.1392e-21	0.52234	0.444	0.335	3.88863e-17	ASPC	Nrip1
Snx24	1.13167e-20	0.627832	0.257	0.162	2.05716e-16	ASPC	Snx24
Nisch	1.97659e-20	0.479308	0.471	0.361	3.59305e-16	ASPC	Nisch
Fbxw11	2.59039e-20	0.504175	0.379	0.272	4.70882e-16	ASPC	Fbxw11
Tead1	4.11674e-20	0.429513	0.406	0.295	7.48341e-16	ASPC	Tead1
Arhgap17	6.00458e-20	0.531221	0.255	0.161	1.09151e-15	ASPC	Arhgap17
Hivep3	1.11987e-19	0.607731	0.282	0.188	2.03569e-15	ASPC	Hivep3
Atp11c	1.98793e-19	0.530616	0.332	0.233	3.61366e-15	ASPC	Atp11c
Nsd3	2.46685e-19	0.450857	0.54	0.449	4.48425e-15	ASPC	Nsd3
Inpp5a	5.39176e-19	0.503552	0.311	0.213	9.80115e-15	ASPC	Inpp5a
Irf2	1.236e-18	0.533757	0.381	0.28	2.24679e-14	ASPC	Irf2
Acvr1	1.3229e-18	0.49158	0.252	0.161	2.40476e-14	ASPC	Acvr1
Stat3	2.43539e-18	0.562275	0.309	0.215	4.42706e-14	ASPC	Stat3
Fam13b	2.67252e-18	0.516344	0.267	0.177	4.8581e-14	ASPC	Fam13b
Klc1	1.02123e-17	0.511571	0.28	0.189	1.85638e-13	ASPC	Klc1
Mrps28	1.80561e-17	0.565394	0.287	0.197	3.28224e-13	ASPC	Mrps28
Iqgap1	3.82147e-17	0.52437	0.259	0.173	6.94668e-13	ASPC	Iqgap1
Stat5b	5.92866e-17	0.469802	0.435	0.343	1.07771e-12	ASPC	Stat5b
Abi1	8.54412e-17	0.495491	0.414	0.326	1.55315e-12	ASPC	Abi1
Smim14	2.49184e-16	0.544662	0.303	0.216	4.52967e-12	ASPC	Smim14
Npepps	3.6014e-16	0.460062	0.392	0.304	6.54663e-12	ASPC	Npepps
Cpeb1	5.2113e-16	0.526551	0.356	0.27	9.47311e-12	ASPC	Cpeb1
Rap1a	5.32732e-16	0.495619	0.274	0.191	9.68401e-12	ASPC	Rap1a
Cped1	6.10635e-16	0.39052	0.759	0.726	1.11001e-11	ASPC	Cped1
Pdxdc1	6.8465e-16	0.556369	0.289	0.204	1.24456e-11	ASPC	Pdxdc1
Csnk1g1	7.07001e-16	0.485769	0.295	0.21	1.28519e-11	ASPC	Csnk1g1
Magi3	8.70027e-16	0.479847	0.386	0.29	1.58154e-11	ASPC	Magi3
Lncppara	1.22887e-15	0.436635	0.504	0.416	2.23384e-11	ASPC	Lncppara
Pds5b	3.06759e-15	0.491615	0.343	0.257	5.57626e-11	ASPC	Pds5b
Kdm5b	3.36777e-15	0.454433	0.275	0.193	6.12193e-11	ASPC	Kdm5b
Pias1	9.31567e-15	0.506387	0.355	0.275	1.6934e-10	ASPC	Pias1
Grk5	9.40303e-15	0.403873	0.407	0.321	1.70928e-10	ASPC	Grk5
Rtn4	1.14844e-14	0.528614	0.305	0.225	2.08763e-10	ASPC	Rtn4
Ap3b1	1.28039e-14	0.429743	0.357	0.274	2.32749e-10	ASPC	Ap3b1
Nsmce2	1.43829e-14	0.492888	0.444	0.367	2.61452e-10	ASPC	Nsmce2
Smarca2	1.67846e-14	0.432428	0.378	0.294	3.05111e-10	ASPC	Smarca2
Rhoa	2.4416e-14	0.551579	0.284	0.204	4.43834e-10	ASPC	Rhoa
Mast2	2.44417e-14	0.428962	0.286	0.202	4.44301e-10	ASPC	Mast2
Slk	2.52572e-14	0.421985	0.265	0.184	4.59126e-10	ASPC	Slk
Cdk8	4.50963e-14	0.310982	0.793	0.793	8.19761e-10	ASPC	Cdk8
Sec24a	4.78011e-14	0.505985	0.46	0.392	8.68929e-10	ASPC	Sec24a
Fus	1.15146e-13	0.323985	0.557	0.475	2.09313e-09	ASPC	Fus
Gnb1	1.22515e-13	0.410479	0.477	0.398	2.22707e-09	ASPC	Gnb1
Phip	1.56135e-13	0.491091	0.303	0.224	2.83822e-09	ASPC	Phip
Tbl1x	2.03646e-13	0.46413	0.453	0.377	3.70187e-09	ASPC	Tbl1x
Ppp3ca	2.12955e-13	0.367862	0.666	0.606	3.87109e-09	ASPC	Ppp3ca
Utrn	2.47378e-13	0.277155	0.772	0.709	4.49685e-09	ASPC	Utrn
Setd5	2.55525e-13	0.389475	0.607	0.55	4.64493e-09	ASPC	Setd5
Bptf	3.89037e-13	0.462176	0.398	0.322	7.07191e-09	ASPC	Bptf
Nptn	4.49612e-13	0.487759	0.407	0.336	8.17305e-09	ASPC	Nptn
Pik3ca	5.33843e-13	0.464996	0.309	0.233	9.70419e-09	ASPC	Pik3ca
Dock9	5.7531e-13	0.339918	0.467	0.385	1.0458e-08	ASPC	Dock9
Kcnq1ot1	7.00334e-13	0.416334	0.501	0.43	1.27307e-08	ASPC	Kcnq1ot1
Cblb	1.296e-12	0.405483	0.595	0.55	2.35588e-08	ASPC	Cblb
Slc10a7	1.33924e-12	0.427073	0.322	0.242	2.43448e-08	ASPC	Slc10a7
Tulp4	1.90997e-12	0.444716	0.358	0.283	3.47195e-08	ASPC	Tulp4
Zswim6	4.24336e-12	0.418536	0.327	0.251	7.71358e-08	ASPC	Zswim6
Rbfox2	4.95815e-12	0.289887	0.735	0.68	9.01293e-08	ASPC	Rbfox2
Sec63	7.20529e-12	0.411517	0.318	0.242	1.30978e-07	ASPC	Sec63
Exoc4	7.32504e-12	0.367398	0.616	0.569	1.33155e-07	ASPC	Exoc4
Erbin	8.34898e-12	0.478459	0.358	0.288	1.51768e-07	ASPC	Erbin
Abl1	1.27068e-11	0.357852	0.382	0.298	2.30985e-07	ASPC	Abl1
Mecom	1.38843e-11	0.713061	0.331	0.266	2.52389e-07	ASPC	Mecom
Pdlim5	1.94989e-11	0.382436	0.442	0.371	3.54451e-07	ASPC	Pdlim5
Otud7b	3.92018e-11	0.429463	0.283	0.214	7.1261e-07	ASPC	Otud7b
Smurf1	4.22763e-11	0.56764	0.351	0.286	7.68498e-07	ASPC	Smurf1
Asph	5.89201e-11	0.347222	0.34	0.263	1.07105e-06	ASPC	Asph
Cdc42	6.05722e-11	0.438429	0.318	0.25	1.10108e-06	ASPC	Cdc42
Ankrd12	1.35425e-10	0.381549	0.518	0.464	2.46176e-06	ASPC	Ankrd12
Gbf1	1.64367e-10	0.379538	0.511	0.456	2.98787e-06	ASPC	Gbf1
Camk2d	1.71902e-10	0.309707	0.589	0.529	3.12484e-06	ASPC	Camk2d
Snx29	2.12225e-10	0.387893	0.4	0.34	3.85782e-06	ASPC	Snx29
Atf7	2.57582e-10	0.389057	0.436	0.376	4.68233e-06	ASPC	Atf7
Pan3	3.41522e-10	0.32357	0.516	0.463	6.20818e-06	ASPC	Pan3
Uso1	4.71135e-10	0.377086	0.291	0.224	8.56429e-06	ASPC	Uso1
Notch2	4.98843e-10	0.430153	0.272	0.209	9.06797e-06	ASPC	Notch2
Ccm2	7.33582e-10	0.409761	0.261	0.197	1.3335e-05	ASPC	Ccm2
Wdfy3	8.50773e-10	0.269735	0.412	0.34	1.54654e-05	ASPC	Wdfy3
Mier1	8.63192e-10	0.407104	0.274	0.212	1.56911e-05	ASPC	Mier1
Large1	8.76722e-10	0.414203	0.545	0.506	1.59371e-05	ASPC	Large1
2023-09-07	9.43465e-10	0.388999	0.285	0.22	1.71503e-05	ASPC	2023-09-07
Arglu1	1.07937e-09	0.361884	0.329	0.262	1.96208e-05	ASPC	Arglu1
Tmcc3	1.15257e-09	0.414446	0.365	0.303	2.09515e-05	ASPC	Tmcc3
Nudcd3	3.81893e-09	0.362533	0.31	0.247	6.94205e-05	ASPC	Nudcd3
Mta3	5.50224e-09	0.376759	0.265	0.204	0.00010002	ASPC	Mta3
Ddx50	7.3219e-09	0.423282	0.362	0.304	0.000133098	ASPC	Ddx50
Cltc	8.22913e-09	0.409454	0.299	0.239	0.000149589	ASPC	Cltc
Arhgef11	8.37342e-09	0.37114	0.351	0.291	0.000152212	ASPC	Arhgef11
Rock1	9.46612e-09	0.341657	0.444	0.385	0.000172075	ASPC	Rock1
Lmbr1	1.16961e-08	0.38239	0.255	0.196	0.000212612	ASPC	Lmbr1
Cast	1.77499e-08	0.365745	0.302	0.245	0.000322657	ASPC	Cast
Lamb1	1.77829e-08	0.393012	0.372	0.311	0.000323257	ASPC	Lamb1
Mga	1.92764e-08	0.297357	0.348	0.285	0.000350407	ASPC	Mga
Kmt5b	2.06428e-08	0.329086	0.328	0.27	0.000375244	ASPC	Kmt5b
Abcc5	2.58503e-08	0.322381	0.295	0.233	0.000469907	ASPC	Abcc5
Bmpr2	2.75118e-08	0.365163	0.342	0.283	0.000500109	ASPC	Bmpr2
Umad1	3.40759e-08	0.374443	0.315	0.253	0.000619431	ASPC	Umad1
Dis3l2	5.79569e-08	0.366475	0.32	0.262	0.00105354	ASPC	Dis3l2
Camk1d	1.1687e-07	0.402864	0.739	0.761	0.00212447	ASPC	Camk1d
Ppp3cb	1.6094e-07	0.372652	0.284	0.231	0.00292557	ASPC	Ppp3cb
Ambra1	1.8917e-07	0.308499	0.49	0.449	0.00343874	ASPC	Ambra1
Thada	1.9337e-07	0.325717	0.299	0.243	0.00351507	ASPC	Thada
Xrn1	2.71278e-07	0.352712	0.324	0.27	0.0049313	ASPC	Xrn1
Kat6a	3.54938e-07	0.359984	0.333	0.282	0.00645206	ASPC	Kat6a
Kat2b	3.80209e-07	0.326143	0.361	0.309	0.00691144	ASPC	Kat2b
Tsc22d2	4.08049e-07	0.414445	0.34	0.294	0.00741751	ASPC	Tsc22d2
Mapk1	4.19936e-07	0.347838	0.339	0.29	0.00763359	ASPC	Mapk1
Elf1	4.27596e-07	0.429411	0.37	0.325	0.00777284	ASPC	Elf1
Mtmr3	4.91549e-07	0.280806	0.466	0.425	0.00893538	ASPC	Mtmr3
Kmt2a	5.06877e-07	0.293428	0.428	0.378	0.00921402	ASPC	Kmt2a
Med13l	6.27613e-07	0.282648	0.542	0.515	0.0114087	ASPC	Med13l
Rlf	6.37913e-07	0.377931	0.269	0.219	0.011596	ASPC	Rlf
Nckap1	1.3143e-06	0.332859	0.408	0.365	0.0238914	ASPC	Nckap1
Rcor1	1.58445e-06	0.351287	0.345	0.3	0.0288021	ASPC	Rcor1
Herc4	2.30352e-06	0.308889	0.325	0.279	0.0418734	ASPC	Herc4
Acsl1	0	2.24285	0.981	0.296	0	Adipocyte	Acsl1
Acaca	0	2.2277	0.926	0.276	0	Adipocyte	Acaca
Ntrk3	0	2.21117	0.954	0.28	0	Adipocyte	Ntrk3
Nrg4	0	2.2002	0.916	0.251	0	Adipocyte	Nrg4
Prkar2b	0	2.11911	0.988	0.374	0	Adipocyte	Prkar2b
Fgf14	0	2.11692	0.865	0.241	0	Adipocyte	Fgf14
Ppargc1b	0	2.09724	0.975	0.325	0	Adipocyte	Ppargc1b
Sik2	0	2.0892	0.947	0.3	0	Adipocyte	Sik2
Slc4a4	0	2.07501	0.909	0.338	0	Adipocyte	Slc4a4
Tspan18	0	2.07476	0.951	0.29	0	Adipocyte	Tspan18
Prkag2	0	2.06707	0.962	0.299	0	Adipocyte	Prkag2
Ppara	0	2.06466	0.977	0.397	0	Adipocyte	Ppara
Pde3b	0	2.05072	0.856	0.233	0	Adipocyte	Pde3b
Rgs7	0	2.04638	0.92	0.267	0	Adipocyte	Rgs7
Acacb	0	2.03702	0.971	0.322	0	Adipocyte	Acacb
Fam13a	0	2.00792	0.876	0.266	0	Adipocyte	Fam13a
Dgat2	0	2.0064	0.827	0.224	0	Adipocyte	Dgat2
Txlng	0	1.99549	0.856	0.241	0	Adipocyte	Txlng
Erbb4	0	1.98984	0.85	0.253	0	Adipocyte	Erbb4
Immp2l	0	1.98949	0.981	0.401	0	Adipocyte	Immp2l
A530053G22Rik	0	1.96329	0.828	0.239	0	Adipocyte	A530053G22Rik
Car3	0	1.96012	0.654	0.185	0	Adipocyte	Car3
Ralgapa2	0	1.95192	0.917	0.305	0	Adipocyte	Ralgapa2
Adra1a	0	1.95092	0.789	0.22	0	Adipocyte	Adra1a
Gpd1	0	1.94666	0.866	0.244	0	Adipocyte	Gpd1
Pank1	0	1.94412	0.829	0.237	0	Adipocyte	Pank1
Slc36a2	0	1.94104	0.832	0.218	0	Adipocyte	Slc36a2
Gm16168	0	1.92065	0.704	0.189	0	Adipocyte	Gm16168
Chpt1	0	1.91511	0.832	0.242	0	Adipocyte	Chpt1
Cidea	0	1.90509	0.763	0.21	0	Adipocyte	Cidea
Pmepa1	0	1.89111	0.806	0.234	0	Adipocyte	Pmepa1
Plin1	0	1.88878	0.815	0.21	0	Adipocyte	Plin1
Prdm16	0	1.88661	0.882	0.275	0	Adipocyte	Prdm16
Tkt	0	1.88122	0.767	0.218	0	Adipocyte	Tkt
4933406I18Rik	0	1.87372	0.832	0.242	0	Adipocyte	4933406I18Rik
Elovl6	0	1.87164	0.709	0.201	0	Adipocyte	Elovl6
Akap1	0	1.84465	0.803	0.227	0	Adipocyte	Akap1
Lipe	0	1.84213	0.87	0.258	0	Adipocyte	Lipe
Ctcflos	0	1.82502	0.684	0.181	0	Adipocyte	Ctcflos
Slc1a5	0	1.82318	0.876	0.301	0	Adipocyte	Slc1a5
Gnas	0	1.8059	0.866	0.356	0	Adipocyte	Gnas
Esrrg	0	1.80448	0.935	0.352	0	Adipocyte	Esrrg
Ppargc1a	0	1.80384	0.651	0.219	0	Adipocyte	Ppargc1a
Pck1	0	1.7981	0.675	0.184	0	Adipocyte	Pck1
Negr1	0	1.79751	0.855	0.297	0	Adipocyte	Negr1
Mlxipl	0	1.79589	0.866	0.29	0	Adipocyte	Mlxipl
Pfkfb3	0	1.77443	0.766	0.239	0	Adipocyte	Pfkfb3
Cnnm2	0	1.77285	0.653	0.183	0	Adipocyte	Cnnm2
Ppp2r5a	0	1.77235	0.925	0.348	0	Adipocyte	Ppp2r5a
Tenm4	0	1.76826	0.772	0.236	0	Adipocyte	Tenm4
Tmem45b	0	1.75221	0.475	0.115	0	Adipocyte	Tmem45b
Gk	0	1.72895	0.482	0.124	0	Adipocyte	Gk
Adipor2	0	1.72569	0.939	0.362	0	Adipocyte	Adipor2
Kcnk3	0	1.72434	0.666	0.185	0	Adipocyte	Kcnk3
Vegfa	0	1.7238	0.854	0.297	0	Adipocyte	Vegfa
Acly	0	1.72334	0.593	0.155	0	Adipocyte	Acly
A530065N20Rik	0	1.70232	0.612	0.169	0	Adipocyte	A530065N20Rik
Ankef1	0	1.69836	0.633	0.165	0	Adipocyte	Ankef1
Pnpla3	0	1.69292	0.615	0.159	0	Adipocyte	Pnpla3
Gtf2ird1	0	1.67778	0.664	0.188	0	Adipocyte	Gtf2ird1
Aco2	0	1.67511	0.858	0.315	0	Adipocyte	Aco2
Gpd2	0	1.6597	0.733	0.246	0	Adipocyte	Gpd2
Nav2	0	1.65911	0.724	0.277	0	Adipocyte	Nav2
Hk2	0	1.65524	0.777	0.27	0	Adipocyte	Hk2
Aspg	0	1.65203	0.621	0.163	0	Adipocyte	Aspg
Coq8a	0	1.64942	0.693	0.21	0	Adipocyte	Coq8a
Itpk1	0	1.64871	0.701	0.225	0	Adipocyte	Itpk1
Efna5	0	1.63807	0.832	0.285	0	Adipocyte	Efna5
Ces1d	0	1.63219	0.613	0.159	0	Adipocyte	Ces1d
Cgnl1	0	1.63101	0.658	0.176	0	Adipocyte	Cgnl1
Cidec	0	1.62768	0.537	0.133	0	Adipocyte	Cidec
Xrcc6	0	1.60585	0.63	0.17	0	Adipocyte	Xrcc6
Acox1	0	1.60185	0.638	0.195	0	Adipocyte	Acox1
Acadm	0	1.5978	0.704	0.208	0	Adipocyte	Acadm
Sucla2	0	1.59119	0.668	0.207	0	Adipocyte	Sucla2
Parm1	0	1.58757	0.536	0.167	0	Adipocyte	Parm1
Pcx	0	1.58709	0.664	0.207	0	Adipocyte	Pcx
Hacd2	0	1.58395	0.619	0.192	0	Adipocyte	Hacd2
Atp1a2	0	1.57817	0.909	0.355	0	Adipocyte	Atp1a2
Gbe1	0	1.57804	0.828	0.318	0	Adipocyte	Gbe1
Pdk4	0	1.57053	0.581	0.164	0	Adipocyte	Pdk4
Sh2b2	0	1.57042	0.596	0.163	0	Adipocyte	Sh2b2
Tfrc	0	1.57004	0.507	0.158	0	Adipocyte	Tfrc
Slc25a42	0	1.56254	0.596	0.18	0	Adipocyte	Slc25a42
Miga2	0	1.56138	0.57	0.135	0	Adipocyte	Miga2
Ptpn4	0	1.56067	0.741	0.268	0	Adipocyte	Ptpn4
A830018L16Rik	0	1.54788	0.513	0.14	0	Adipocyte	A830018L16Rik
Itpr2	0	1.54576	0.922	0.439	0	Adipocyte	Itpr2
Acot11	0	1.52646	0.512	0.134	0	Adipocyte	Acot11
Tspan12	0	1.52546	0.704	0.227	0	Adipocyte	Tspan12
Fasn	0	1.52479	0.634	0.183	0	Adipocyte	Fasn
Gucd1	0	1.51422	0.523	0.153	0	Adipocyte	Gucd1
Acvr1c	0	1.51378	0.529	0.138	0	Adipocyte	Acvr1c
Hadhb	0	1.51377	0.648	0.199	0	Adipocyte	Hadhb
Rnf152	0	1.51206	0.671	0.236	0	Adipocyte	Rnf152
Cpt1b	0	1.50805	0.643	0.191	0	Adipocyte	Cpt1b
Fam214a	0	1.50693	0.793	0.308	0	Adipocyte	Fam214a
Ucp1	0	1.5051	0.467	0.121	0	Adipocyte	Ucp1
Gpam	0	1.49759	0.609	0.191	0	Adipocyte	Gpam
Hadha	0	1.49543	0.625	0.184	0	Adipocyte	Hadha
Por	0	1.48008	0.729	0.263	0	Adipocyte	Por
Bckdhb	0	1.47862	0.748	0.293	0	Adipocyte	Bckdhb
Slc27a1	0	1.47439	0.501	0.133	0	Adipocyte	Slc27a1
Slc25a51	0	1.46812	0.535	0.138	0	Adipocyte	Slc25a51
Ppp1r3b	0	1.46049	0.507	0.13	0	Adipocyte	Ppp1r3b
Slc22a23	0	1.45652	0.559	0.183	0	Adipocyte	Slc22a23
Vwa8	0	1.45522	0.835	0.386	0	Adipocyte	Vwa8
Gnpat	0	1.44182	0.592	0.166	0	Adipocyte	Gnpat
Slc25a20	0	1.4399	0.524	0.145	0	Adipocyte	Slc25a20
Gpat4	0	1.43339	0.549	0.156	0	Adipocyte	Gpat4
Slc1a3	0	1.42577	0.595	0.225	0	Adipocyte	Slc1a3
Cdo1	0	1.42016	0.467	0.12	0	Adipocyte	Cdo1
Fam126b	0	1.42015	0.531	0.163	0	Adipocyte	Fam126b
Ptprd	0	1.40547	0.851	0.395	0	Adipocyte	Ptprd
Dpyd	0	1.40353	0.809	0.355	0	Adipocyte	Dpyd
Ivns1abp	0	1.40181	0.57	0.184	0	Adipocyte	Ivns1abp
Grk3	0	1.39726	0.653	0.224	0	Adipocyte	Grk3
Ddhd2	0	1.39498	0.499	0.144	0	Adipocyte	Ddhd2
Abcd3	0	1.39209	0.638	0.231	0	Adipocyte	Abcd3
Atl2	0	1.38084	0.567	0.211	0	Adipocyte	Atl2
Agpat2	0	1.3777	0.468	0.12	0	Adipocyte	Agpat2
Tmem120b	0	1.36625	0.52	0.184	0	Adipocyte	Tmem120b
Gm35853	0	1.35453	0.477	0.133	0	Adipocyte	Gm35853
Sh3kbp1	0	1.35453	0.736	0.294	0	Adipocyte	Sh3kbp1
Rbm47	0	1.34605	0.539	0.159	0	Adipocyte	Rbm47
Akt2	0	1.3397	0.517	0.15	0	Adipocyte	Akt2
Hsd17b12	0	1.33206	0.512	0.155	0	Adipocyte	Hsd17b12
Acss2	0	1.33104	0.476	0.156	0	Adipocyte	Acss2
Thrsp	0	1.32964	0.519	0.148	0	Adipocyte	Thrsp
Pparg	0	1.32882	0.979	0.59	0	Adipocyte	Pparg
Pex14	0	1.32138	0.631	0.249	0	Adipocyte	Pex14
Sipa1l1	0	1.32049	0.712	0.278	0	Adipocyte	Sipa1l1
Sgcd	0	1.31335	0.797	0.344	0	Adipocyte	Sgcd
Lpin1	0	1.3062	0.702	0.255	0	Adipocyte	Lpin1
Shb	0	1.30606	0.552	0.208	0	Adipocyte	Shb
Mical3	0	1.29998	0.752	0.334	0	Adipocyte	Mical3
Slc25a19	0	1.29805	0.456	0.116	0	Adipocyte	Slc25a19
Dgat1	0	1.29404	0.424	0.106	0	Adipocyte	Dgat1
Inca1	0	1.29142	0.423	0.105	0	Adipocyte	Inca1
Ghr	0	1.28903	0.879	0.518	0	Adipocyte	Ghr
Ppip5k1	0	1.28321	0.51	0.17	0	Adipocyte	Ppip5k1
Cluh	0	1.28089	0.512	0.166	0	Adipocyte	Cluh
Ank	0	1.25607	0.666	0.293	0	Adipocyte	Ank
Acadl	0	1.23349	0.556	0.197	0	Adipocyte	Acadl
Ppp1r9a	0	1.22924	0.608	0.23	0	Adipocyte	Ppp1r9a
Dlat	0	1.22768	0.501	0.176	0	Adipocyte	Dlat
Ogdh	0	1.22493	0.69	0.301	0	Adipocyte	Ogdh
Tob2	0	1.21784	0.536	0.191	0	Adipocyte	Tob2
Bcl6	0	1.21621	0.611	0.265	0	Adipocyte	Bcl6
2023-09-09	0	1.20459	0.693	0.328	0	Adipocyte	2023-09-09
Slc24a3	0	1.20007	0.915	0.491	0	Adipocyte	Slc24a3
Cnst	0	1.19841	0.525	0.206	0	Adipocyte	Cnst
Nfia	0	1.18964	0.989	0.751	0	Adipocyte	Nfia
Pakap	0	1.18195	0.74	0.327	0	Adipocyte	Pakap
Clybl	0	1.17897	0.589	0.251	0	Adipocyte	Clybl
Optn	0	1.16808	0.506	0.182	0	Adipocyte	Optn
Nampt	0	1.16132	0.568	0.247	0	Adipocyte	Nampt
Larp1b	0	1.1603	0.528	0.206	0	Adipocyte	Larp1b
Foxo1	0	1.15895	0.803	0.477	0	Adipocyte	Foxo1
Scd1	0	1.1586	0.658	0.216	0	Adipocyte	Scd1
Stau2	0	1.13886	0.563	0.241	0	Adipocyte	Stau2
Gys1	0	1.12388	0.524	0.201	0	Adipocyte	Gys1
Tns1	0	1.12096	0.967	0.663	0	Adipocyte	Tns1
Chchd3	0	1.09693	0.838	0.483	0	Adipocyte	Chchd3
Ahcyl1	0	1.09434	0.636	0.292	0	Adipocyte	Ahcyl1
Gm26917	0	1.05867	0.967	0.678	0	Adipocyte	Gm26917
Thrb	0	1.05788	0.821	0.361	0	Adipocyte	Thrb
Atxn2	0	1.05244	0.79	0.449	0	Adipocyte	Atxn2
Cpeb3	0	1.03541	0.643	0.309	0	Adipocyte	Cpeb3
Rreb1	0	0.926451	0.833	0.547	0	Adipocyte	Rreb1
Nedd4l	0	0.902709	0.815	0.541	0	Adipocyte	Nedd4l
Prkce	0	0.833196	0.919	0.681	0	Adipocyte	Prkce
Neat1	0	0.820814	0.983	0.676	0	Adipocyte	Neat1
Luc7l2	0	0.804954	0.936	0.702	0	Adipocyte	Luc7l2
Rsrp1	0	0.775013	0.827	0.538	0	Adipocyte	Rsrp1
Sorbs1	0	0.751456	0.866	0.567	0	Adipocyte	Sorbs1
Prkn	0	0.718737	0.864	0.551	0	Adipocyte	Prkn
Pde4d	0	0.686723	0.939	0.541	0	Adipocyte	Pde4d
Sox5	0	0.684393	0.956	0.618	0	Adipocyte	Sox5
Sox6	0	0.401266	0.713	0.302	0	Adipocyte	Sox6
Cd36	2.63476e-307	0.53589	0.879	0.51	4.78946e-303	Adipocyte	Cd36
Ywhag	1.52869e-306	1.11131	0.547	0.232	2.77885e-302	Adipocyte	Ywhag
Smoc1	6.36887e-305	1.38644	0.416	0.108	1.15773e-300	Adipocyte	Smoc1
D5Ertd579e	2.24037e-304	1.07355	0.59	0.281	4.07254e-300	Adipocyte	D5Ertd579e
Grina	2.06465e-302	1.21274	0.495	0.175	3.75312e-298	Adipocyte	Grina
Vgll4	8.02262e-299	1.09558	0.654	0.359	1.45835e-294	Adipocyte	Vgll4
Mpc1	3.0534e-298	1.10954	0.527	0.213	5.55047e-294	Adipocyte	Mpc1
Pygl	3.08783e-294	1.31246	0.433	0.124	5.61305e-290	Adipocyte	Pygl
Ddo	4.51163e-293	1.24944	0.437	0.138	8.20124e-289	Adipocyte	Ddo
Etfa	1.32746e-292	1.06975	0.549	0.239	2.41305e-288	Adipocyte	Etfa
Il15ra	2.80082e-291	1.08634	0.542	0.231	5.09132e-287	Adipocyte	Il15ra
Aifm2	1.49101e-289	1.23422	0.402	0.103	2.71035e-285	Adipocyte	Aifm2
Sfxn5	3.78277e-289	1.2153	0.462	0.158	6.87632e-285	Adipocyte	Sfxn5
Nr6a1	1.49746e-288	1.02798	0.588	0.279	2.72208e-284	Adipocyte	Nr6a1
Ltbp3	1.96988e-287	1.18247	0.461	0.156	3.58084e-283	Adipocyte	Ltbp3
Idh3a	1.1516e-285	1.19737	0.419	0.124	2.09338e-281	Adipocyte	Idh3a
Aplp2	1.38029e-285	0.966404	0.628	0.312	2.50909e-281	Adipocyte	Aplp2
Trarg1	2.2845e-284	1.22904	0.404	0.106	4.15276e-280	Adipocyte	Trarg1
Entpd5	4.95583e-284	1.197	0.419	0.118	9.00871e-280	Adipocyte	Entpd5
Plin4	7.45562e-284	1.24458	0.465	0.165	1.35528e-279	Adipocyte	Plin4
Aacs	3.74766e-283	1.32079	0.388	0.094	6.81249e-279	Adipocyte	Aacs
Tbc1d4	8.55461e-280	0.965998	0.601	0.285	1.55506e-275	Adipocyte	Tbc1d4
Slc16a10	5.24608e-279	1.16362	0.509	0.205	9.53633e-275	Adipocyte	Slc16a10
Med12l	5.41322e-275	1.18755	0.432	0.134	9.84014e-271	Adipocyte	Med12l
Mtss1	7.74142e-272	0.807496	0.718	0.404	1.40723e-267	Adipocyte	Mtss1
Nrp2	3.38257e-271	0.770447	0.619	0.286	6.14883e-267	Adipocyte	Nrp2
Mmd	1.6112e-270	1.29857	0.352	0.074	2.92884e-266	Adipocyte	Mmd
Arhgap26	1.14765e-267	0.729644	0.796	0.492	2.08621e-263	Adipocyte	Arhgap26
Pald1	1.12878e-266	1.00566	0.544	0.231	2.0519e-262	Adipocyte	Pald1
Lgr6	3.69401e-266	1.35167	0.375	0.094	6.71496e-262	Adipocyte	Lgr6
Srrm2	1.6665e-264	0.721924	0.849	0.64	3.02936e-260	Adipocyte	Srrm2
Hibch	3.28044e-264	1.1479	0.419	0.135	5.96319e-260	Adipocyte	Hibch
Gm3289	7.43027e-263	1.16635	0.361	0.083	1.35067e-258	Adipocyte	Gm3289
Ddhd1	4.00914e-262	1.09185	0.496	0.201	7.28782e-258	Adipocyte	Ddhd1
Lama4	6.3097e-261	0.883542	0.678	0.391	1.14698e-256	Adipocyte	Lama4
Plin2	1.0626e-259	1.02385	0.513	0.219	1.93159e-255	Adipocyte	Plin2
Dcun1d3	1.86927e-257	1.11444	0.522	0.235	3.39796e-253	Adipocyte	Dcun1d3
Acss3	3.8795e-255	1.05298	0.542	0.253	7.05216e-251	Adipocyte	Acss3
Lonp2	1.02033e-254	0.884335	0.637	0.364	1.85476e-250	Adipocyte	Lonp2
Adrb3	7.65449e-253	1.24621	0.35	0.08	1.39143e-248	Adipocyte	Adrb3
Fhit	4.79668e-251	0.967968	0.625	0.342	8.7194e-247	Adipocyte	Fhit
Osbpl11	2.12824e-248	1.03692	0.49	0.207	3.86871e-244	Adipocyte	Osbpl11
Crat	7.08374e-248	1.13625	0.363	0.094	1.28768e-243	Adipocyte	Crat
Ephx2	1.54075e-246	1.12241	0.368	0.097	2.80077e-242	Adipocyte	Ephx2
Adtrp	2.0166e-245	1.24327	0.358	0.092	3.66577e-241	Adipocyte	Adtrp
Pkn1	2.67079e-240	1.02193	0.444	0.165	4.85496e-236	Adipocyte	Pkn1
Dnajc15	8.35386e-239	1.08679	0.369	0.106	1.51857e-234	Adipocyte	Dnajc15
Esrra	2.11897e-236	1.08474	0.399	0.132	3.85186e-232	Adipocyte	Esrra
G0s2	1.16051e-234	1.18002	0.326	0.072	2.10957e-230	Adipocyte	G0s2
Pim1	1.37034e-234	1.15326	0.349	0.092	2.49101e-230	Adipocyte	Pim1
Cat	1.76834e-234	1.09898	0.363	0.103	3.21448e-230	Adipocyte	Cat
Lncbate1	1.36978e-233	1.17364	0.341	0.086	2.48998e-229	Adipocyte	Lncbate1
Noct	1.23636e-232	1.15911	0.468	0.199	2.24746e-228	Adipocyte	Noct
Nfyc	9.49943e-230	0.962398	0.527	0.257	1.72681e-225	Adipocyte	Nfyc
Agmo	1.12234e-226	0.619413	0.806	0.529	2.04019e-222	Adipocyte	Agmo
Slc27a2	2.1584e-226	1.13949	0.34	0.088	3.92354e-222	Adipocyte	Slc27a2
Chd4	2.22013e-226	0.842493	0.658	0.387	4.03576e-222	Adipocyte	Chd4
4931406C07Rik	4.33944e-226	1.0786	0.352	0.097	7.88823e-222	Adipocyte	4931406C07Rik
Aco1	6.94802e-226	1.02982	0.412	0.147	1.26301e-221	Adipocyte	Aco1
Gm35552	4.28221e-223	1.14607	0.331	0.083	7.78419e-219	Adipocyte	Gm35552
Tmem135	2.39043e-222	0.755626	0.709	0.462	4.34533e-218	Adipocyte	Tmem135
Pkm	4.39314e-222	1.02301	0.417	0.157	7.98585e-218	Adipocyte	Pkm
Afg3l2	1.3839e-221	1.03514	0.406	0.148	2.51565e-217	Adipocyte	Afg3l2
Tmem132b	2.11258e-217	1.31919	0.329	0.083	3.84024e-213	Adipocyte	Tmem132b
Sugct	8.03833e-217	1.1398	0.379	0.124	1.46121e-212	Adipocyte	Sugct
Ebf2	2.20222e-216	0.564795	0.902	0.604	4.00319e-212	Adipocyte	Ebf2
Acad11	2.34746e-216	1.0525	0.353	0.106	4.26721e-212	Adipocyte	Acad11
Etfdh	2.64571e-215	1.07433	0.322	0.081	4.80937e-211	Adipocyte	Etfdh
Slc22a5	1.99647e-214	1.05639	0.368	0.119	3.62917e-210	Adipocyte	Slc22a5
Svep1	3.46688e-214	0.851479	0.571	0.29	6.30209e-210	Adipocyte	Svep1
Pfkfb1	2.73043e-213	1.01464	0.392	0.143	4.96337e-209	Adipocyte	Pfkfb1
Adam12	4.70596e-212	0.732348	0.675	0.382	8.55449e-208	Adipocyte	Adam12
Gm17276	3.18392e-210	1.24405	0.367	0.121	5.78772e-206	Adipocyte	Gm17276
Pkd2l2	2.30105e-209	1.0605	0.336	0.096	4.18286e-205	Adipocyte	Pkd2l2
Ak2	1.60889e-208	1.04453	0.336	0.097	2.92464e-204	Adipocyte	Ak2
Mecr	2.83682e-206	1.03546	0.346	0.107	5.15677e-202	Adipocyte	Mecr
4732471J01Rik	4.762e-206	1.01384	0.422	0.171	8.65637e-202	Adipocyte	4732471J01Rik
Insr	1.68542e-204	0.735994	0.656	0.405	3.06375e-200	Adipocyte	Insr
P2rx5	5.35694e-204	1.08271	0.315	0.081	9.73784e-200	Adipocyte	P2rx5
Sorcs2	1.9691e-203	1.06481	0.407	0.158	3.57943e-199	Adipocyte	Sorcs2
Acaa2	3.34586e-203	1.00105	0.36	0.118	6.08211e-199	Adipocyte	Acaa2
Cs	3.44002e-202	0.964999	0.416	0.171	6.25327e-198	Adipocyte	Cs
Lctl	2.34709e-201	1.12334	0.298	0.069	4.26654e-197	Adipocyte	Lctl
Adcy3	4.37579e-201	1.02581	0.459	0.205	7.9543e-197	Adipocyte	Adcy3
Pex13	4.53393e-200	1.01489	0.345	0.111	8.24178e-196	Adipocyte	Pex13
Ntrk2	2.91155e-199	0.957074	0.439	0.184	5.29261e-195	Adipocyte	Ntrk2
Palmd	3.26018e-199	0.769	0.514	0.241	5.92635e-195	Adipocyte	Palmd
Slc22a3	1.06701e-198	1.05913	0.309	0.08	1.9396e-194	Adipocyte	Slc22a3
Mgll	2.49908e-196	0.338264	0.751	0.425	4.54283e-192	Adipocyte	Mgll
Pus10	1.56668e-192	0.952077	0.376	0.14	2.84792e-188	Adipocyte	Pus10
Hsd17b4	1.77463e-192	0.981079	0.349	0.118	3.22592e-188	Adipocyte	Hsd17b4
Lpl	2.29236e-192	0.726669	0.659	0.4	4.16705e-188	Adipocyte	Lpl
Sntb1	2.94405e-192	1.15169	0.348	0.115	5.35169e-188	Adipocyte	Sntb1
Nol4l	4.85228e-192	1.1032	0.35	0.117	8.82047e-188	Adipocyte	Nol4l
Hipk2	8.71226e-192	0.865009	0.484	0.236	1.58371e-187	Adipocyte	Hipk2
Mif4gd	3.52262e-191	1.01433	0.299	0.076	6.40341e-187	Adipocyte	Mif4gd
Eml5	4.56987e-191	0.989415	0.344	0.114	8.30711e-187	Adipocyte	Eml5
Acss1	1.22444e-190	1.02762	0.369	0.133	2.22579e-186	Adipocyte	Acss1
Dagla	3.87774e-190	0.963536	0.361	0.127	7.04896e-186	Adipocyte	Dagla
Taldo1	9.20634e-188	0.982497	0.324	0.097	1.67353e-183	Adipocyte	Taldo1
Nrp1	2.18949e-186	0.59943	0.795	0.56	3.98006e-182	Adipocyte	Nrp1
Zfp827	4.15678e-185	0.892135	0.425	0.181	7.55619e-181	Adipocyte	Zfp827
Rbpms2	1.68395e-184	0.95812	0.335	0.107	3.06108e-180	Adipocyte	Rbpms2
Clstn3	6.71512e-184	0.996771	0.286	0.071	1.22067e-179	Adipocyte	Clstn3
Plbd1	8.21893e-184	0.930813	0.319	0.096	1.49404e-179	Adipocyte	Plbd1
Mettl24	1.52681e-183	1.05325	0.332	0.109	2.77544e-179	Adipocyte	Mettl24
Ap3s1	1.08544e-182	0.852061	0.433	0.189	1.97312e-178	Adipocyte	Ap3s1
Decr1	1.21353e-182	0.9418	0.326	0.104	2.20596e-178	Adipocyte	Decr1
Nabp1	1.75764e-182	1.02987	0.29	0.075	3.19504e-178	Adipocyte	Nabp1
Tef	8.64526e-181	0.795704	0.597	0.355	1.57154e-176	Adipocyte	Tef
Vps13a	3.71779e-180	0.787088	0.554	0.316	6.75821e-176	Adipocyte	Vps13a
Fut8	2.85079e-179	0.793805	0.529	0.287	5.18217e-175	Adipocyte	Fut8
Ifi27	4.59349e-179	0.930514	0.313	0.094	8.35004e-175	Adipocyte	Ifi27
Hivep1	6.49065e-179	0.863808	0.481	0.242	1.17987e-174	Adipocyte	Hivep1
Bbof1	2.83557e-177	1.01985	0.269	0.064	5.15451e-173	Adipocyte	Bbof1
Itpr1	1.45147e-176	0.537552	0.806	0.598	2.63848e-172	Adipocyte	Itpr1
Phka2	1.49706e-176	0.913512	0.364	0.139	2.72135e-172	Adipocyte	Phka2
Sh3pxd2a	1.96652e-175	0.814916	0.698	0.49	3.57475e-171	Adipocyte	Sh3pxd2a
Pex5	3.93815e-175	0.943219	0.273	0.067	7.15877e-171	Adipocyte	Pex5
Dag1	2.23261e-174	0.734289	0.581	0.341	4.05844e-170	Adipocyte	Dag1
Cables1	3.38675e-174	0.975795	0.37	0.143	6.15644e-170	Adipocyte	Cables1
Me1	5.9846e-174	1.13141	0.329	0.115	1.08788e-169	Adipocyte	Me1
Rere	2.77616e-173	0.490881	0.907	0.785	5.0465e-169	Adipocyte	Rere
Col27a1	5.63642e-172	0.927279	0.43	0.196	1.02459e-167	Adipocyte	Col27a1
Csad	9.97442e-172	0.919744	0.332	0.115	1.81315e-167	Adipocyte	Csad
Eci1	7.44314e-171	0.961667	0.27	0.069	1.35301e-166	Adipocyte	Eci1
Mtor	3.3477e-170	0.836835	0.439	0.207	6.08545e-166	Adipocyte	Mtor
Wipi2	3.41666e-168	0.971366	0.344	0.128	6.2108e-164	Adipocyte	Wipi2
Gse1	4.50807e-168	0.772134	0.737	0.507	8.19478e-164	Adipocyte	Gse1
Glul	2.09064e-167	0.907997	0.381	0.162	3.80036e-163	Adipocyte	Glul
Myl1	5.37521e-167	0.434576	0.455	0.201	9.77106e-163	Adipocyte	Myl1
Dhdh	1.01697e-166	0.911372	0.318	0.108	1.84864e-162	Adipocyte	Dhdh
Dlst	6.61207e-166	0.834815	0.42	0.195	1.20194e-161	Adipocyte	Dlst
Slc12a7	1.2962e-165	0.867792	0.34	0.121	2.35623e-161	Adipocyte	Slc12a7
Rmnd1	6.38049e-165	0.938622	0.301	0.097	1.15985e-160	Adipocyte	Rmnd1
Sbno2	1.67163e-163	0.873522	0.35	0.134	3.03869e-159	Adipocyte	Sbno2
Pon3	3.48897e-163	0.910484	0.295	0.091	6.34224e-159	Adipocyte	Pon3
Acat1	4.47291e-162	0.890611	0.379	0.163	8.13085e-158	Adipocyte	Acat1
Arl4a	1.25776e-161	0.937008	0.264	0.068	2.28635e-157	Adipocyte	Arl4a
Pakap.1	2.93366e-161	0.365247	0.827	0.549	5.3328e-157	Adipocyte	Pakap.1
Hibadh	5.86793e-161	0.748414	0.531	0.308	1.06667e-156	Adipocyte	Hibadh
Alas1	9.57674e-158	0.939874	0.281	0.084	1.74086e-153	Adipocyte	Alas1
Qk	4.13158e-156	0.512367	0.808	0.619	7.51039e-152	Adipocyte	Qk
N4bp2l1	5.89545e-155	0.87845	0.304	0.103	1.07168e-150	Adipocyte	N4bp2l1
Ptpa	1.00626e-154	0.863034	0.352	0.143	1.82919e-150	Adipocyte	Ptpa
Tmeff1	2.45348e-152	0.936436	0.255	0.067	4.45994e-148	Adipocyte	Tmeff1
Tob1	8.36591e-151	0.884086	0.331	0.13	1.52075e-146	Adipocyte	Tob1
Abca1	2.50908e-150	0.694822	0.546	0.327	4.561e-146	Adipocyte	Abca1
Flcn	5.41933e-150	0.913073	0.282	0.09	9.85126e-146	Adipocyte	Flcn
Mpc2	1.90528e-149	0.891074	0.308	0.114	3.46342e-145	Adipocyte	Mpc2
Cdip1	1.07592e-148	0.764209	0.431	0.217	1.95581e-144	Adipocyte	Cdip1
Sod2	2.70585e-148	0.859829	0.325	0.127	4.91869e-144	Adipocyte	Sod2
Acyp2	9.26627e-148	0.593139	0.688	0.453	1.68442e-143	Adipocyte	Acyp2
Golgb1	6.47278e-147	0.743416	0.535	0.315	1.17662e-142	Adipocyte	Golgb1
Mfn2	1.22421e-146	0.86505	0.305	0.112	2.22537e-142	Adipocyte	Mfn2
Hadh	9.43962e-146	0.822523	0.297	0.103	1.71593e-141	Adipocyte	Hadh
Stx18	1.52802e-145	0.745236	0.44	0.226	2.77764e-141	Adipocyte	Stx18
Pcsk61	2.89397e-145	0.584074	0.364	0.149	5.26066e-141	Adipocyte	Pcsk6
Pdha1	1.72595e-144	0.774614	0.318	0.12	3.13743e-140	Adipocyte	Pdha1
Ganc	3.22825e-144	0.868596	0.293	0.104	5.86832e-140	Adipocyte	Ganc
Cyth1	1.41785e-143	0.396712	0.7	0.45	2.57737e-139	Adipocyte	Cyth1
Cmtm4	3.06452e-143	0.815786	0.337	0.136	5.57068e-139	Adipocyte	Cmtm4
Cav1	2.45546e-142	0.408827	0.611	0.345	4.46354e-138	Adipocyte	Cav1
Adcy9	4.84389e-142	0.597235	0.7	0.478	8.80522e-138	Adipocyte	Adcy9
Ahcyl2	1.13644e-141	0.714915	0.479	0.263	2.06583e-137	Adipocyte	Ahcyl2
Ankrd17	3.27135e-141	0.520382	0.796	0.643	5.94666e-137	Adipocyte	Ankrd17
Lrba	6.74145e-141	0.627734	0.631	0.432	1.22546e-136	Adipocyte	Lrba
Vldlr	7.42782e-141	0.82523	0.333	0.136	1.35023e-136	Adipocyte	Vldlr
Ptgr2	7.63155e-141	0.838948	0.284	0.098	1.38726e-136	Adipocyte	Ptgr2
Srebf1	3.09704e-139	0.838791	0.271	0.088	5.62979e-135	Adipocyte	Srebf1
Txnip	3.91619e-138	0.637393	0.541	0.321	7.11885e-134	Adipocyte	Txnip
Atf2	1.37544e-137	0.710893	0.501	0.29	2.50028e-133	Adipocyte	Atf2
Dot1l	1.47086e-137	0.820046	0.341	0.147	2.67374e-133	Adipocyte	Dot1l
Atg10	4.00371e-137	0.697415	0.508	0.298	7.27794e-133	Adipocyte	Atg10
Pcca	6.45774e-137	0.658817	0.55	0.342	1.17389e-132	Adipocyte	Pcca
Agl	2.15682e-136	0.58559	0.421	0.201	3.92068e-132	Adipocyte	Agl
Snx10	2.40507e-136	0.72582	0.382	0.176	4.37194e-132	Adipocyte	Snx10
Aldoa	1.00934e-135	0.781427	0.357	0.162	1.83478e-131	Adipocyte	Aldoa
A530020G20Rik	6.32723e-134	0.822427	0.253	0.077	1.15016e-129	Adipocyte	A530020G20Rik
Psap	1.92461e-133	0.652729	0.432	0.219	3.49856e-129	Adipocyte	Psap
Kank1	2.91492e-132	0.779437	0.301	0.114	5.29875e-128	Adipocyte	Kank1
Arel1	6.89687e-132	0.808487	0.294	0.112	1.25371e-127	Adipocyte	Arel1
Dcaf6	3.38865e-131	0.603711	0.614	0.402	6.1599e-127	Adipocyte	Dcaf6
Rps6ka5	5.30816e-131	0.681884	0.448	0.243	9.64918e-127	Adipocyte	Rps6ka5
Fam234a	5.88444e-131	0.805598	0.31	0.126	1.06967e-126	Adipocyte	Fam234a
Suclg1	3.46051e-130	0.785554	0.298	0.116	6.29052e-126	Adipocyte	Suclg1
Macrod1	9.08064e-130	0.736833	0.38	0.18	1.65068e-125	Adipocyte	Macrod1
Pgm1	1.33246e-129	0.669261	0.377	0.177	2.42214e-125	Adipocyte	Pgm1
Mtch2	2.39223e-129	0.737822	0.357	0.165	4.3486e-125	Adipocyte	Mtch2
Galm	1.5751e-128	0.835922	0.264	0.09	2.86321e-124	Adipocyte	Galm
Tomm40	2.95341e-128	0.815546	0.281	0.104	5.3687e-124	Adipocyte	Tomm40
Ucp3	4.18598e-127	0.817751	0.252	0.083	7.60927e-123	Adipocyte	Ucp3
Aox1	4.1949e-127	0.709395	0.418	0.221	7.62548e-123	Adipocyte	Aox1
Faf1	1.14044e-126	0.58735	0.625	0.434	2.07309e-122	Adipocyte	Faf1
Nrbp2	1.33296e-126	0.850657	0.284	0.106	2.42305e-122	Adipocyte	Nrbp2
Ophn1	4.15253e-126	0.607744	0.561	0.356	7.54847e-122	Adipocyte	Ophn1
Cdh2	8.49016e-126	0.630823	0.412	0.205	1.54334e-121	Adipocyte	Cdh2
Pcsk5	2.66118e-125	0.788745	0.285	0.109	4.83749e-121	Adipocyte	Pcsk5
Srsf11	3.38005e-125	0.597344	0.611	0.414	6.14426e-121	Adipocyte	Srsf11
Pnpla2	8.48436e-125	0.740858	0.265	0.091	1.54229e-120	Adipocyte	Pnpla2
Dtnbp1	1.76602e-124	0.652277	0.43	0.229	3.21028e-120	Adipocyte	Dtnbp1
Dusp10	2.59962e-124	0.839186	0.346	0.161	4.72559e-120	Adipocyte	Dusp10
Mmaa	2.95738e-124	0.794306	0.265	0.096	5.37593e-120	Adipocyte	Mmaa
Plgrkt	1.20143e-123	0.744222	0.328	0.141	2.18395e-119	Adipocyte	Plgrkt
Sgpl1	1.2343e-123	0.752332	0.322	0.136	2.24372e-119	Adipocyte	Sgpl1
Ndufs1	3.7218e-123	0.728382	0.37	0.184	6.76548e-119	Adipocyte	Ndufs1
Egln1	9.16742e-123	0.744981	0.384	0.195	1.66645e-118	Adipocyte	Egln1
Pdhb	1.18515e-122	0.782018	0.264	0.094	2.15437e-118	Adipocyte	Pdhb
Bcl2l13	1.18687e-122	0.736924	0.329	0.147	2.15749e-118	Adipocyte	Bcl2l13
Chp1	9.09924e-121	0.761111	0.356	0.174	1.65406e-116	Adipocyte	Chp1
Ctdspl	3.32258e-120	0.716564	0.438	0.239	6.03978e-116	Adipocyte	Ctdspl
Mbp	1.44253e-119	0.754838	0.264	0.095	2.62223e-115	Adipocyte	Mbp
Mme	5.72185e-119	0.729642	0.286	0.112	1.04012e-114	Adipocyte	Mme
Lrpprc	1.79797e-118	0.735515	0.341	0.163	3.26834e-114	Adipocyte	Lrpprc
Nudt13	2.07701e-118	0.748938	0.266	0.099	3.77558e-114	Adipocyte	Nudt13
Dgkd	2.97456e-118	0.551637	0.548	0.344	5.40716e-114	Adipocyte	Dgkd
Ybx2	8.374e-118	0.760343	0.263	0.095	1.52223e-113	Adipocyte	Ybx2
Ube4b	2.37794e-117	0.603277	0.527	0.336	4.32262e-113	Adipocyte	Ube4b
Bnip3	5.06543e-117	0.850207	0.254	0.094	9.20793e-113	Adipocyte	Bnip3
Slc7a6	1.00427e-115	0.794256	0.3	0.13	1.82556e-111	Adipocyte	Slc7a6
Smad6	1.50374e-115	0.764846	0.342	0.16	2.7335e-111	Adipocyte	Smad6
Tmed5	2.44963e-115	0.750711	0.349	0.169	4.45293e-111	Adipocyte	Tmed5
Stk11	1.15949e-114	0.758048	0.351	0.173	2.10771e-110	Adipocyte	Stk11
F3	6.9925e-114	0.710793	0.265	0.097	1.2711e-109	Adipocyte	F3
Atp2a2	2.95538e-113	0.501058	0.467	0.264	5.37228e-109	Adipocyte	Atp2a2
R3hdm1	3.84472e-113	0.584763	0.556	0.37	6.98893e-109	Adipocyte	R3hdm1
Gphn	1.59024e-112	0.254517	0.979	0.878	2.89073e-108	Adipocyte	Gphn
Sort1	2.98129e-111	0.664882	0.33	0.155	5.41939e-107	Adipocyte	Sort1
Mettl7a1	1.18162e-110	0.756135	0.27	0.11	2.14794e-106	Adipocyte	Mettl7a1
Ubr5	3.90146e-109	0.498582	0.705	0.535	7.09207e-105	Adipocyte	Ubr5
Nadk	1.16805e-108	0.657415	0.389	0.21	2.12329e-104	Adipocyte	Nadk
Prkd1	5.16645e-108	0.458436	0.59	0.385	9.39157e-104	Adipocyte	Prkd1
Srsf10	8.32829e-108	0.658263	0.368	0.19	1.51392e-103	Adipocyte	Srsf10
Kansl1l	2.00063e-107	0.602788	0.575	0.391	3.63674e-103	Adipocyte	Kansl1l
Hspa9	2.18136e-107	0.683614	0.309	0.141	3.96527e-103	Adipocyte	Hspa9
Msi2	2.53382e-107	0.351245	0.81	0.596	4.60599e-103	Adipocyte	Msi2
Mgmt	3.17832e-106	0.696814	0.316	0.147	5.77754e-102	Adipocyte	Mgmt
Fggy	5.27608e-106	0.657161	0.399	0.22	9.59085e-102	Adipocyte	Fggy
Dleu2	5.50375e-106	0.512623	0.736	0.569	1.00047e-101	Adipocyte	Dleu2
Wwox	8.97196e-105	0.34638	0.838	0.666	1.63092e-100	Adipocyte	Wwox
Syap1	1.13563e-104	0.681207	0.265	0.107	2.06434e-100	Adipocyte	Syap1
Urgcp	1.20614e-104	0.599687	0.439	0.256	2.19253e-100	Adipocyte	Urgcp
Resf1	2.21287e-104	0.868939	0.376	0.209	4.02255e-100	Adipocyte	Resf1
Clpx	2.66205e-103	0.670999	0.349	0.18	4.83907e-99	Adipocyte	Clpx
Akap7	4.74155e-103	0.628526	0.433	0.254	8.61919e-99	Adipocyte	Akap7
Rhoq	6.45823e-103	0.643568	0.44	0.266	1.17398e-98	Adipocyte	Rhoq
Ndufs3	8.19682e-103	0.724629	0.269	0.115	1.49002e-98	Adipocyte	Ndufs3
Fmo1	9.67331e-103	0.568276	0.382	0.198	1.75841e-98	Adipocyte	Fmo1
Pabpn1	1.49815e-102	0.602573	0.513	0.331	2.72333e-98	Adipocyte	Pabpn1
Pag1	1.19017e-101	0.709474	0.306	0.144	2.16349e-97	Adipocyte	Pag1
Fry	1.69495e-101	0.373481	0.797	0.617	3.08108e-97	Adipocyte	Fry
Ccnl1	7.50222e-101	0.554484	0.54	0.36	1.36375e-96	Adipocyte	Ccnl1
Caprin1	2.15648e-100	0.569528	0.486	0.308	3.92005e-96	Adipocyte	Caprin1
AC149090.1	5.41748e-99	0.500185	0.597	0.402	9.84789e-95	Adipocyte	AC149090.1
Cox10	3.34274e-97	0.669045	0.309	0.152	6.07644e-93	Adipocyte	Cox10
Pcgf5	4.39158e-97	0.61015	0.392	0.221	7.98301e-93	Adipocyte	Pcgf5
Mpp7	1.04578e-96	0.577195	0.406	0.232	1.90102e-92	Adipocyte	Mpp7
Pde7b	1.54108e-96	0.416078	0.563	0.365	2.80137e-92	Adipocyte	Pde7b
Pde1a	2.2148e-96	0.599847	0.369	0.196	4.02606e-92	Adipocyte	Pde1a
Deptor	3.047e-96	0.586544	0.459	0.282	5.53884e-92	Adipocyte	Deptor
Afg1l	3.08653e-96	0.580642	0.438	0.267	5.61069e-92	Adipocyte	Afg1l
Dnajc11	4.99294e-95	0.686129	0.272	0.122	9.07617e-91	Adipocyte	Dnajc11
Atp5a1	5.64601e-95	0.634346	0.278	0.126	1.02633e-90	Adipocyte	Atp5a1
Art3	1.00605e-94	0.517094	0.46	0.278	1.82879e-90	Adipocyte	Art3
Ccnl2	1.08826e-94	0.530009	0.575	0.404	1.97824e-90	Adipocyte	Ccnl2
Prpf38b	1.12947e-94	0.571301	0.513	0.337	2.05315e-90	Adipocyte	Prpf38b
Supt3	1.31428e-94	0.543427	0.453	0.273	2.3891e-90	Adipocyte	Supt3
Adk	2.28034e-94	0.418051	0.584	0.388	4.14521e-90	Adipocyte	Adk
Khdrbs3	4.03751e-94	0.677827	0.266	0.116	7.33938e-90	Adipocyte	Khdrbs3
Epb41	1.156e-93	0.251169	0.593	0.381	2.10137e-89	Adipocyte	Epb41
Comt	1.20908e-93	0.61257	0.349	0.185	2.19786e-89	Adipocyte	Comt
Ifrd1	1.37014e-93	0.625665	0.361	0.2	2.49064e-89	Adipocyte	Ifrd1
Prpf4b	3.01219e-93	0.560425	0.589	0.418	5.47556e-89	Adipocyte	Prpf4b
Fam117a	4.52651e-93	0.669656	0.287	0.133	8.22829e-89	Adipocyte	Fam117a
Mapt	8.49518e-93	0.569454	0.385	0.215	1.54425e-88	Adipocyte	Mapt
Chd7	1.1438e-92	0.499175	0.446	0.267	2.07921e-88	Adipocyte	Chd7
2023-03-03	5.2322e-92	0.559856	0.558	0.384	9.51109e-88	Adipocyte	2023-03-03
Kif16b	6.1207e-92	0.55862	0.464	0.295	1.11262e-87	Adipocyte	Kif16b
Dlg2	6.3153e-92	0.574018	0.273	0.121	1.148e-87	Adipocyte	Dlg2
Uqcrc2	8.60207e-92	0.640107	0.279	0.13	1.56369e-87	Adipocyte	Uqcrc2
Rgcc	1.32701e-91	0.393989	0.395	0.212	2.41223e-87	Adipocyte	Rgcc
Cpped1	1.4836e-91	0.636443	0.343	0.186	2.6969e-87	Adipocyte	Cpped1
Ell2	3.44907e-91	0.650771	0.323	0.169	6.26971e-87	Adipocyte	Ell2
Osbpl1a	3.21851e-90	0.642257	0.299	0.147	5.8506e-86	Adipocyte	Osbpl1a
Mtx2	1.05551e-89	0.633731	0.292	0.144	1.9187e-85	Adipocyte	Mtx2
Ebf3	6.99039e-89	0.58557	0.634	0.469	1.27071e-84	Adipocyte	Ebf3
Arhgap5	2.62265e-88	0.53295	0.448	0.281	4.76746e-84	Adipocyte	Arhgap5
Nhsl2	4.75182e-88	0.524027	0.367	0.198	8.63786e-84	Adipocyte	Nhsl2
Gpbp1l1	4.94581e-88	0.56494	0.398	0.234	8.9905e-84	Adipocyte	Gpbp1l1
Megf9	8.07121e-88	0.592574	0.262	0.115	1.46718e-83	Adipocyte	Megf9
Atp5b	7.15356e-87	0.559143	0.284	0.136	1.30037e-82	Adipocyte	Atp5b
Camta2	1.14386e-86	0.625902	0.285	0.138	2.07932e-82	Adipocyte	Camta2
2023-03-05	1.23023e-86	0.611156	0.3	0.151	2.23631e-82	Adipocyte	2023-03-05
Larp4	4.50874e-86	0.576705	0.364	0.206	8.19599e-82	Adipocyte	Larp4
Gnao1	2.22475e-85	0.55275	0.347	0.187	4.04415e-81	Adipocyte	Gnao1
Enpp2	9.75515e-84	0.593276	0.32	0.167	1.77329e-79	Adipocyte	Enpp2
Slc25a17	9.99054e-84	0.649652	0.256	0.119	1.81608e-79	Adipocyte	Slc25a17
Sdha	1.4459e-83	0.568427	0.345	0.192	2.62836e-79	Adipocyte	Sdha
Cog4	1.47148e-83	0.560741	0.329	0.176	2.67485e-79	Adipocyte	Cog4
Camsap2	2.63894e-83	0.56219	0.381	0.223	4.79706e-79	Adipocyte	Camsap2
Cecr2	3.65247e-83	0.530711	0.421	0.26	6.63947e-79	Adipocyte	Cecr2
Rmdn1	5.81595e-83	0.587219	0.36	0.209	1.05722e-78	Adipocyte	Rmdn1
Uqcc1	1.15276e-82	0.59282	0.336	0.187	2.09549e-78	Adipocyte	Uqcc1
Agpat3	1.47382e-82	0.589817	0.362	0.209	2.67911e-78	Adipocyte	Agpat3
Galnt2	2.40671e-82	0.599104	0.374	0.219	4.37492e-78	Adipocyte	Galnt2
Ptpn14	8.40227e-82	0.561419	0.306	0.159	1.52736e-77	Adipocyte	Ptpn14
2700097O09Rik	1.54966e-81	0.621227	0.262	0.125	2.81698e-77	Adipocyte	2700097O09Rik
Mapkapk2	1.90409e-81	0.646617	0.372	0.222	3.46126e-77	Adipocyte	Mapkapk2
Kcnb1	1.21163e-80	0.534847	0.262	0.121	2.2025e-76	Adipocyte	Kcnb1
Pik3r1	1.83666e-80	0.629768	0.635	0.49	3.33867e-76	Adipocyte	Pik3r1
Pdgfd	3.82185e-80	0.304274	0.472	0.289	6.94736e-76	Adipocyte	Pdgfd
Gmps	1.22206e-78	0.585215	0.252	0.117	2.22145e-74	Adipocyte	Gmps
Angpt1	1.37816e-78	0.531481	0.452	0.288	2.50522e-74	Adipocyte	Angpt1
Ikzf2	2.972e-78	0.50687	0.321	0.174	5.40251e-74	Adipocyte	Ikzf2
Slmap	7.01131e-78	0.488951	0.545	0.391	1.27452e-73	Adipocyte	Slmap
B4galt1	1.55483e-77	0.467545	0.502	0.34	2.82637e-73	Adipocyte	B4galt1
Nacc2	8.4667e-77	0.627018	0.252	0.121	1.53908e-72	Adipocyte	Nacc2
Baz2a	8.76863e-77	0.507091	0.44	0.286	1.59396e-72	Adipocyte	Baz2a
Ehmt1	2.38684e-75	0.443909	0.623	0.471	4.33879e-71	Adipocyte	Ehmt1
Taf1d	3.40952e-74	0.601232	0.304	0.168	6.19782e-70	Adipocyte	Taf1d
Paip2	5.38053e-74	0.504818	0.389	0.238	9.78072e-70	Adipocyte	Paip2
Epb41l1	1.38148e-73	0.474061	0.413	0.252	2.51125e-69	Adipocyte	Epb41l1
Rarb	3.62433e-73	0.566278	0.302	0.164	6.5883e-69	Adipocyte	Rarb
Vps13d	3.78852e-73	0.430131	0.585	0.432	6.88677e-69	Adipocyte	Vps13d
Uty	1.47223e-72	0.456445	0.582	0.43	2.67622e-68	Adipocyte	Uty
Zfhx41	2.93987e-72	0.311514	0.6	0.427	5.3441e-68	Adipocyte	Zfhx4
Gpi1	7.72809e-72	0.556471	0.367	0.227	1.40481e-67	Adipocyte	Gpi1
Tmem131l	1.09836e-71	0.525172	0.304	0.165	1.9966e-67	Adipocyte	Tmem131l
Eif4g1	1.32834e-71	0.47504	0.519	0.368	2.41466e-67	Adipocyte	Eif4g1
Me3	1.12983e-70	0.574172	0.283	0.152	2.05381e-66	Adipocyte	Me3
Golga4	3.23588e-70	0.497629	0.508	0.36	5.88219e-66	Adipocyte	Golga4
Pnpla8	5.93015e-70	0.501745	0.341	0.198	1.07798e-65	Adipocyte	Pnpla8
Micos10	8.81627e-70	0.537709	0.27	0.141	1.60262e-65	Adipocyte	Micos10
Nedd4	8.92794e-70	0.342464	0.786	0.66	1.62292e-65	Adipocyte	Nedd4
Mtm1	2.47156e-69	0.558488	0.255	0.129	4.49281e-65	Adipocyte	Mtm1
Srl	9.1462e-69	0.580732	0.266	0.139	1.6626e-64	Adipocyte	Srl
Immt	6.28708e-68	0.502401	0.31	0.175	1.14287e-63	Adipocyte	Immt
Nr3c2	1.1334e-67	0.413592	0.666	0.522	2.0603e-63	Adipocyte	Nr3c2
Cdk6	1.29003e-67	0.447178	0.301	0.163	2.34502e-63	Adipocyte	Cdk6
Numa1	2.95958e-67	0.4722	0.424	0.277	5.37992e-63	Adipocyte	Numa1
Oxr1	4.77692e-67	0.311152	0.523	0.359	8.68348e-63	Adipocyte	Oxr1
Glcci1	7.11191e-67	0.466006	0.28	0.148	1.2928e-62	Adipocyte	Glcci1
Hivep2	1.37813e-65	0.314825	0.861	0.751	2.50516e-61	Adipocyte	Hivep2
Arfgef2	2.95743e-65	0.483013	0.444	0.303	5.37602e-61	Adipocyte	Arfgef2
Tnfaip8	2.00835e-64	0.393192	0.416	0.259	3.65077e-60	Adipocyte	Tnfaip8
Pitpnm2	3.39738e-64	0.474375	0.389	0.247	6.17576e-60	Adipocyte	Pitpnm2
Focad	6.4415e-64	0.476929	0.294	0.166	1.17094e-59	Adipocyte	Focad
Acbd5	8.05264e-64	0.491488	0.307	0.177	1.46381e-59	Adipocyte	Acbd5
Clec16a	5.20142e-63	0.471698	0.341	0.208	9.45514e-59	Adipocyte	Clec16a
Lrrc8d	6.04444e-63	0.452388	0.429	0.283	1.09876e-58	Adipocyte	Lrrc8d
Kif1c	9.30861e-63	0.522392	0.266	0.145	1.69212e-58	Adipocyte	Kif1c
Ric8b	9.91254e-63	0.477684	0.373	0.239	1.8019e-58	Adipocyte	Ric8b
Snx14	1.46064e-62	0.497593	0.253	0.133	2.65514e-58	Adipocyte	Snx14
Vps13c	1.93716e-62	0.462791	0.41	0.27	3.52136e-58	Adipocyte	Vps13c
Suclg2	2.08607e-62	0.470914	0.358	0.226	3.79206e-58	Adipocyte	Suclg2
Pard3	2.67165e-62	0.252346	0.694	0.522	4.85653e-58	Adipocyte	Pard3
Map3k5	4.75013e-62	0.376371	0.553	0.401	8.63478e-58	Adipocyte	Map3k5
Ctsb	1.2001e-61	0.429377	0.251	0.129	2.18155e-57	Adipocyte	Ctsb
4930402H24Rik	4.21422e-61	0.348139	0.579	0.426	7.66061e-57	Adipocyte	4930402H24Rik
Pde8a	1.36179e-60	0.360001	0.477	0.326	2.47546e-56	Adipocyte	Pde8a
Tomm70a	2.14246e-60	0.484306	0.285	0.162	3.89456e-56	Adipocyte	Tomm70a
Pcmtd1	3.97829e-60	0.407793	0.465	0.321	7.23174e-56	Adipocyte	Pcmtd1
Usp33	1.11409e-59	0.454006	0.365	0.233	2.0252e-55	Adipocyte	Usp33
Atl3	1.45446e-59	0.466529	0.315	0.187	2.64391e-55	Adipocyte	Atl3
Anxa6	1.43857e-58	0.499526	0.309	0.187	2.61504e-54	Adipocyte	Anxa6
Zkscan3	6.25612e-58	0.413371	0.406	0.271	1.13724e-53	Adipocyte	Zkscan3
Hnrnpu	7.10942e-58	0.383747	0.598	0.466	1.29235e-53	Adipocyte	Hnrnpu
Orc3	2.97284e-57	0.472772	0.283	0.164	5.40403e-53	Adipocyte	Orc3
Stk40	4.05103e-57	0.474226	0.286	0.166	7.36396e-53	Adipocyte	Stk40
Lrmda	1.44184e-56	0.256827	0.809	0.665	2.62098e-52	Adipocyte	Lrmda
Rbm39	1.77999e-56	0.28284	0.836	0.746	3.23566e-52	Adipocyte	Rbm39
Ppm1b	3.38198e-55	0.428836	0.408	0.28	6.14777e-51	Adipocyte	Ppm1b
Kansl3	4.18427e-55	0.476428	0.297	0.179	7.60616e-51	Adipocyte	Kansl3
Asxl2	4.26049e-55	0.408177	0.421	0.29	7.74471e-51	Adipocyte	Asxl2
Ncor1	6.72813e-55	0.3154	0.723	0.604	1.22304e-50	Adipocyte	Ncor1
Ecpas	7.23489e-55	0.367521	0.589	0.457	1.31516e-50	Adipocyte	Ecpas
Bfar	1.10908e-54	0.457896	0.253	0.14	2.01609e-50	Adipocyte	Bfar
Rbm25	1.46849e-54	0.349483	0.704	0.578	2.66943e-50	Adipocyte	Rbm25
Tex2	2.78826e-54	0.413157	0.355	0.227	5.0685e-50	Adipocyte	Tex2
Lmtk2	3.07619e-53	0.406138	0.267	0.151	5.5919e-49	Adipocyte	Lmtk2
Fam120c	3.70484e-53	0.497644	0.262	0.152	6.73466e-49	Adipocyte	Fam120c
Opa1	1.57669e-52	0.407895	0.309	0.189	2.86611e-48	Adipocyte	Opa1
Rasl12	1.72772e-52	0.30308	0.407	0.262	3.14065e-48	Adipocyte	Rasl12
Ergic1	2.3038e-52	0.432881	0.364	0.241	4.18784e-48	Adipocyte	Ergic1
Lpcat3	2.51091e-52	0.412394	0.321	0.197	4.56433e-48	Adipocyte	Lpcat3
Znrf1	4.90902e-52	0.328733	0.602	0.473	8.92362e-48	Adipocyte	Znrf1
Srsf2	6.41114e-52	0.394897	0.475	0.34	1.16542e-47	Adipocyte	Srsf2
Zfp445	9.25216e-52	0.445476	0.361	0.242	1.68186e-47	Adipocyte	Zfp445
Ube2q2	1.57558e-51	0.459865	0.273	0.162	2.86409e-47	Adipocyte	Ube2q2
Itprid2	3.47748e-51	0.425746	0.266	0.153	6.32137e-47	Adipocyte	Itprid2
Tom1l2	1.1102e-50	0.329166	0.586	0.451	2.01812e-46	Adipocyte	Tom1l2
Slc20a2	1.1287e-50	0.456838	0.341	0.224	2.05176e-46	Adipocyte	Slc20a2
Lrig2	1.48721e-50	0.431404	0.328	0.211	2.70344e-46	Adipocyte	Lrig2
Rtn3	1.7657e-50	0.324744	0.644	0.519	3.20968e-46	Adipocyte	Rtn3
Fyco1	1.87752e-50	0.440099	0.291	0.178	3.41296e-46	Adipocyte	Fyco1
Dym	3.42701e-50	0.365797	0.51	0.384	6.22962e-46	Adipocyte	Dym
2210408F21Rik	6.98429e-50	0.29481	0.496	0.35	1.2696e-45	Adipocyte	2210408F21Rik
Safb	1.17739e-49	0.423361	0.379	0.258	2.14026e-45	Adipocyte	Safb
Peg3	2.13266e-49	0.453483	0.33	0.211	3.87674e-45	Adipocyte	Peg3
Nt5c2	4.35056e-49	0.394524	0.316	0.198	7.90844e-45	Adipocyte	Nt5c2
Hdlbp	5.887e-49	0.401452	0.393	0.272	1.07014e-44	Adipocyte	Hdlbp
Esr1	4.07823e-48	0.364459	0.464	0.331	7.41341e-44	Adipocyte	Esr1
Stimate	1.17783e-47	0.430632	0.331	0.217	2.14106e-43	Adipocyte	Stimate
Pum1	4.39112e-47	0.369004	0.535	0.415	7.98217e-43	Adipocyte	Pum1
Cdk12	1.05046e-46	0.331049	0.502	0.376	1.90952e-42	Adipocyte	Cdk12
Sfmbt1	1.36762e-46	0.355757	0.359	0.238	2.48606e-42	Adipocyte	Sfmbt1
Ube2w	2.04558e-46	0.381311	0.352	0.236	3.71846e-42	Adipocyte	Ube2w
Dnm1l	2.31777e-46	0.385576	0.323	0.208	4.21324e-42	Adipocyte	Dnm1l
Scarf1	6.17302e-46	0.409549	0.274	0.166	1.12213e-41	Adipocyte	Scarf1
Map3k1	6.48615e-46	0.369521	0.372	0.25	1.17905e-41	Adipocyte	Map3k1
Pikfyve	2.84844e-45	0.389263	0.32	0.208	5.17789e-41	Adipocyte	Pikfyve
Ndufs4	3.54607e-45	0.353734	0.44	0.321	6.44604e-41	Adipocyte	Ndufs4
Cyb5b	4.5624e-45	0.396162	0.301	0.192	8.29354e-41	Adipocyte	Cyb5b
Lrig1	6.3304e-45	0.467859	0.331	0.22	1.15074e-40	Adipocyte	Lrig1
2610507B11Rik	1.03857e-44	0.423191	0.321	0.213	1.88791e-40	Adipocyte	2610507B11Rik
Ncoa7	2.91272e-44	0.345247	0.326	0.21	5.29474e-40	Adipocyte	Ncoa7
Sec22a	3.2484e-44	0.392377	0.261	0.158	5.90495e-40	Adipocyte	Sec22a
Adcy6	5.85323e-44	0.371313	0.314	0.201	1.064e-39	Adipocyte	Adcy6
Mir100hg1	6.7664e-44	0.263447	0.531	0.401	1.23e-39	Adipocyte	Mir100hg
Huwe1	1.73317e-43	0.32055	0.628	0.511	3.15056e-39	Adipocyte	Huwe1
Srek1	2.22203e-43	0.373692	0.515	0.398	4.0392e-39	Adipocyte	Srek1
Trak1	7.35438e-43	0.297541	0.668	0.554	1.33688e-38	Adipocyte	Trak1
Rc3h1	1.37293e-42	0.335224	0.443	0.325	2.49572e-38	Adipocyte	Rc3h1
Wapl	1.47031e-42	0.317343	0.546	0.423	2.67273e-38	Adipocyte	Wapl
Kif1b	1.55006e-42	0.254471	0.661	0.524	2.81769e-38	Adipocyte	Kif1b
Zzef1	3.89646e-42	0.354166	0.424	0.309	7.08299e-38	Adipocyte	Zzef1
Tacc1	4.58625e-42	0.320568	0.583	0.452	8.33688e-38	Adipocyte	Tacc1
Bicd2	7.61249e-42	0.413268	0.274	0.174	1.3838e-37	Adipocyte	Bicd2
Mbtd1	3.91883e-41	0.326318	0.442	0.324	7.12364e-37	Adipocyte	Mbtd1
Tfcp2	5.81128e-41	0.401696	0.271	0.172	1.05638e-36	Adipocyte	Tfcp2
St3gal3	5.92234e-41	0.329824	0.365	0.253	1.07656e-36	Adipocyte	St3gal3
Gm20732	6.29695e-41	0.386728	0.319	0.214	1.14466e-36	Adipocyte	Gm20732
U2surp	6.63694e-41	0.346177	0.376	0.264	1.20646e-36	Adipocyte	U2surp
Ptpn11	2.23945e-40	0.36818	0.307	0.202	4.07087e-36	Adipocyte	Ptpn11
Vkorc1l1	5.75554e-40	0.312957	0.377	0.265	1.04624e-35	Adipocyte	Vkorc1l1
Ube2k	7.15276e-40	0.284431	0.58	0.468	1.30023e-35	Adipocyte	Ube2k
Nmt2	8.04596e-40	0.3452	0.305	0.202	1.46259e-35	Adipocyte	Nmt2
Ggnbp2	9.00937e-40	0.32157	0.514	0.401	1.63772e-35	Adipocyte	Ggnbp2
Afap1	1.0585e-39	0.33707	0.342	0.231	1.92415e-35	Adipocyte	Afap1
Eif5	1.21473e-39	0.379265	0.293	0.192	2.20814e-35	Adipocyte	Eif5
Slc30a9	2.36688e-39	0.367124	0.316	0.212	4.30251e-35	Adipocyte	Slc30a9
Pptc7	3.21485e-39	0.415093	0.257	0.164	5.84396e-35	Adipocyte	Pptc7
Foxn2	3.61679e-39	0.365888	0.283	0.182	6.5746e-35	Adipocyte	Foxn2
Safb2	1.07303e-38	0.356218	0.399	0.288	1.95055e-34	Adipocyte	Safb2
Tank	1.28316e-38	0.300667	0.263	0.163	2.33253e-34	Adipocyte	Tank
Kcmf1	1.39308e-38	0.319216	0.526	0.418	2.53235e-34	Adipocyte	Kcmf1
Fbxo11	1.73326e-38	0.279101	0.575	0.461	3.15073e-34	Adipocyte	Fbxo11
Irs1	4.70217e-38	0.423953	0.371	0.265	8.5476e-34	Adipocyte	Irs1
Ylpm1	2.49521e-37	0.317274	0.425	0.314	4.5358e-33	Adipocyte	Ylpm1
Mtus1	6.57202e-37	0.256304	0.452	0.333	1.19466e-32	Adipocyte	Mtus1
Psmd11	1.29653e-36	0.350406	0.282	0.186	2.35683e-32	Adipocyte	Psmd11
Cdk13	1.41671e-36	0.286205	0.542	0.431	2.5753e-32	Adipocyte	Cdk13
Macrod2	2.43189e-36	0.336389	0.324	0.222	4.42069e-32	Adipocyte	Macrod2
Lypla1	5.36872e-36	0.350952	0.272	0.178	9.75926e-32	Adipocyte	Lypla1
Fgd4	1.99162e-35	0.302667	0.303	0.205	3.62037e-31	Adipocyte	Fgd4
2023-03-06	3.71478e-35	0.327726	0.326	0.228	6.75272e-31	Adipocyte	2023-03-06
Ndufv2	5.51575e-35	0.355204	0.256	0.166	1.00265e-30	Adipocyte	Ndufv2
Nktr	6.60348e-35	0.269117	0.615	0.506	1.20038e-30	Adipocyte	Nktr
Piezo1	8.78476e-35	0.283782	0.304	0.204	1.59689e-30	Adipocyte	Piezo1
Paxbp1	1.38141e-34	0.339856	0.291	0.197	2.51112e-30	Adipocyte	Paxbp1
Hnrnph3	2.04933e-34	0.330397	0.265	0.173	3.72527e-30	Adipocyte	Hnrnph3
Gtf2i	4.33702e-34	0.310818	0.444	0.339	7.88383e-30	Adipocyte	Gtf2i
Baz1b	5.52524e-34	0.321095	0.487	0.384	1.00438e-29	Adipocyte	Baz1b
Ppp1r10	6.59286e-34	0.372012	0.257	0.168	1.19845e-29	Adipocyte	Ppp1r10
Lamb11	9.77368e-34	0.280645	0.327	0.224	1.77666e-29	Adipocyte	Lamb1
Trmt1l	1.93315e-33	0.347674	0.277	0.187	3.51408e-29	Adipocyte	Trmt1l
9930021J03Rik	4.1886e-33	0.280306	0.382	0.279	7.61404e-29	Adipocyte	9930021J03Rik
Rfx7	4.89348e-33	0.295634	0.377	0.274	8.89536e-29	Adipocyte	Rfx7
Mef2d	5.05771e-33	0.313982	0.443	0.344	9.19391e-29	Adipocyte	Mef2d
Atf1	5.85005e-33	0.336103	0.291	0.199	1.06342e-28	Adipocyte	Atf1
Scarb2	1.65429e-32	0.326015	0.279	0.189	3.00718e-28	Adipocyte	Scarb2
Usp8	1.78538e-32	0.305604	0.306	0.211	3.24546e-28	Adipocyte	Usp8
Prkdc	1.98731e-32	0.32661	0.261	0.173	3.61253e-28	Adipocyte	Prkdc
Ubr4	1.99089e-32	0.352096	0.343	0.248	3.61905e-28	Adipocyte	Ubr4
Chst11	1.99891e-32	0.339241	0.455	0.348	3.63362e-28	Adipocyte	Chst11
Zfp91	4.3031e-32	0.328161	0.281	0.192	7.82217e-28	Adipocyte	Zfp91
Baz1a	1.31531e-31	0.303282	0.29	0.196	2.39097e-27	Adipocyte	Baz1a
Ranbp2	1.47401e-31	0.292565	0.423	0.321	2.67945e-27	Adipocyte	Ranbp2
Tmem245	1.51859e-31	0.261747	0.446	0.34	2.7605e-27	Adipocyte	Tmem245
Ube4a	1.52753e-31	0.323087	0.274	0.186	2.77674e-27	Adipocyte	Ube4a
Zranb1	1.73007e-31	0.278368	0.356	0.26	3.14492e-27	Adipocyte	Zranb1
Trpm7	2.00382e-31	0.279354	0.556	0.455	3.64255e-27	Adipocyte	Trpm7
Zfp423	2.26217e-31	0.305277	0.5	0.402	4.11218e-27	Adipocyte	Zfp423
Mbd5	2.80705e-31	0.254721	0.647	0.557	5.10266e-27	Adipocyte	Mbd5
Ppp4r2	2.89369e-31	0.312295	0.327	0.235	5.26016e-27	Adipocyte	Ppp4r2
Cdc27	7.04965e-31	0.287359	0.298	0.207	1.28149e-26	Adipocyte	Cdc27
Bcl9l	1.40781e-30	0.333972	0.255	0.17	2.55911e-26	Adipocyte	Bcl9l
Ptpn2	2.58844e-30	0.300029	0.276	0.189	4.70527e-26	Adipocyte	Ptpn2
Zfhx3	4.14675e-30	0.261782	0.64	0.528	7.53797e-26	Adipocyte	Zfhx3
Ubxn4	4.978e-30	0.299357	0.341	0.248	9.04902e-26	Adipocyte	Ubxn4
Metap1d	6.97027e-30	0.318642	0.325	0.233	1.26706e-25	Adipocyte	Metap1d
Eif5b	1.62591e-29	0.368385	0.313	0.227	2.95558e-25	Adipocyte	Eif5b
Pcf11	2.28141e-29	0.285239	0.329	0.237	4.14715e-25	Adipocyte	Pcf11
Ttc19	4.62377e-29	0.285244	0.284	0.198	8.40509e-25	Adipocyte	Ttc19
Bdp1	5.59864e-29	0.304627	0.345	0.255	1.01772e-24	Adipocyte	Bdp1
Ifnar2	7.25065e-29	0.265693	0.252	0.166	1.31802e-24	Adipocyte	Ifnar2
Rffl	9.59308e-29	0.315884	0.29	0.205	1.74383e-24	Adipocyte	Rffl
Larp4b	1.18559e-28	0.271992	0.419	0.324	2.15517e-24	Adipocyte	Larp4b
Ube3a	1.26277e-28	0.274549	0.472	0.376	2.29546e-24	Adipocyte	Ube3a
Mark2	2.39629e-28	0.27794	0.523	0.427	4.35597e-24	Adipocyte	Mark2
Akap9	2.39728e-28	0.253399	0.515	0.411	4.35778e-24	Adipocyte	Akap9
Eps15l1	6.58464e-28	0.259259	0.387	0.293	1.19696e-23	Adipocyte	Eps15l1
Sil1	7.5791e-28	0.296005	0.289	0.204	1.37773e-23	Adipocyte	Sil1
Ubr3	9.49991e-28	0.257381	0.601	0.507	1.72689e-23	Adipocyte	Ubr3
Dcaf8	2.16862e-27	0.304646	0.358	0.27	3.94212e-23	Adipocyte	Dcaf8
Fbxo3	2.36325e-27	0.282832	0.258	0.177	4.29592e-23	Adipocyte	Fbxo3
Dnajc7	2.5059e-27	0.2817	0.426	0.335	4.55523e-23	Adipocyte	Dnajc7
Luc7l	3.08698e-27	0.304578	0.304	0.218	5.61151e-23	Adipocyte	Luc7l
Eif4g2	3.94285e-27	0.29289	0.315	0.23	7.16732e-23	Adipocyte	Eif4g2
Tdrd3	8.67527e-27	0.266606	0.355	0.266	1.57699e-22	Adipocyte	Tdrd3
Pds5a	1.15469e-26	0.255898	0.447	0.351	2.099e-22	Adipocyte	Pds5a
Clk4	1.30004e-26	0.267903	0.345	0.257	2.36321e-22	Adipocyte	Clk4
Zbtb11	2.89218e-26	0.312376	0.272	0.192	5.25741e-22	Adipocyte	Zbtb11
Zfp654	3.86712e-26	0.285695	0.253	0.176	7.02965e-22	Adipocyte	Zfp654
Rhot1	3.87086e-26	0.274738	0.318	0.233	7.03644e-22	Adipocyte	Rhot1
Thrap3	4.46013e-26	0.26314	0.46	0.369	8.10762e-22	Adipocyte	Thrap3
Abcc4	1.05482e-25	0.317237	0.318	0.235	1.91746e-21	Adipocyte	Abcc4
Desi2	1.39636e-25	0.254339	0.361	0.273	2.5383e-21	Adipocyte	Desi2
Zmym5	3.32943e-25	0.250566	0.369	0.28	6.05224e-21	Adipocyte	Zmym5
Wdr37	4.51114e-25	0.262211	0.297	0.215	8.20036e-21	Adipocyte	Wdr37
Cabin1	4.77234e-25	0.285882	0.271	0.193	8.67515e-21	Adipocyte	Cabin1
Phf3	7.14058e-25	0.274592	0.392	0.306	1.29801e-20	Adipocyte	Phf3
Ppm1a	7.92398e-25	0.291189	0.283	0.204	1.44042e-20	Adipocyte	Ppm1a
Trim2	9.39029e-25	0.302275	0.258	0.18	1.70697e-20	Adipocyte	Trim2
Trip11	9.51477e-25	0.261971	0.466	0.375	1.72959e-20	Adipocyte	Trip11
Hnrnpl	1.12615e-24	0.271042	0.384	0.296	2.04712e-20	Adipocyte	Hnrnpl
Kdm5a	1.20709e-24	0.258514	0.394	0.306	2.19425e-20	Adipocyte	Kdm5a
Txndc11	1.61736e-24	0.258081	0.277	0.198	2.94004e-20	Adipocyte	Txndc11
Psmd14	8.62828e-24	0.260842	0.259	0.183	1.56845e-19	Adipocyte	Psmd14
Micu3	1.3104e-23	0.273668	0.27	0.195	2.38204e-19	Adipocyte	Micu3
Hnrnpll	6.42874e-23	0.251528	0.256	0.181	1.16862e-18	Adipocyte	Hnrnpll
Tshz1	9.27e-23	0.259332	0.284	0.208	1.6851e-18	Adipocyte	Tshz1
Zfp236	2.1139e-22	0.25166	0.283	0.208	3.84265e-18	Adipocyte	Zfp236
Stt3b	1.93562e-21	0.253176	0.267	0.195	3.51858e-17	Adipocyte	Stt3b
Pnn	3.89266e-17	0.256654	0.277	0.215	7.07607e-13	Adipocyte	Pnn
Gm47283	4.70276e-12	0.337264	0.501	0.443	8.54867e-08	Adipocyte	Gm47283
Arhgap15	0	4.43563	0.804	0.005	0	Macrophage	Arhgap15
Dock2	0	4.10972	0.777	0.001	0	Macrophage	Dock2
F13a1	0	3.95261	0.427	0.002	0	Macrophage	F13a1
Mctp1	0	3.63982	0.468	0.003	0	Macrophage	Mctp1
Slc9a91	0	3.62215	0.651	0.021	0	Macrophage	Slc9a9
Runx1	0	3.5957	0.664	0.011	0	Macrophage	Runx1
Ptprj	0	3.45514	0.608	0.02	0	Macrophage	Ptprj
Ptprc	0	3.40925	0.602	0.001	0	Macrophage	Ptprc
Mrc1	0	3.26927	0.422	0.001	0	Macrophage	Mrc1
Slc8a11	0	2.99079	0.449	0.025	0	Macrophage	Slc8a1
Prkcb	0	2.97124	0.524	0.005	0	Macrophage	Prkcb
Bank1	0	2.85159	0.371	0.001	0	Macrophage	Bank1
Pip4k2a	0	2.81353	0.573	0.052	0	Macrophage	Pip4k2a
Elmo11	0	2.69081	0.624	0.043	0	Macrophage	Elmo1
Hdac9	0	2.6836	0.454	0.025	0	Macrophage	Hdac9
Inpp4b	0	2.67689	0.374	0.02	0	Macrophage	Inpp4b
Fyb	0	2.62074	0.465	0.01	0	Macrophage	Fyb
Dab2	0	2.59998	0.344	0.013	0	Macrophage	Dab2
Ppm1h	0	2.50618	0.454	0.03	0	Macrophage	Ppm1h
Syk	0	2.44991	0.401	0.001	0	Macrophage	Syk
Nrros	0	2.44257	0.452	0.008	0	Macrophage	Nrros
Gm26740	0	2.43792	0.492	0.013	0	Macrophage	Gm26740
Alcam	0	2.41217	0.269	0.013	0	Macrophage	Alcam
Inpp5d	0	2.40965	0.444	0.006	0	Macrophage	Inpp5d
Vav31	0	2.39717	0.452	0.034	0	Macrophage	Vav3
2023-03-01	0	2.37638	0.387	0.001	0	Macrophage	2023-03-01
Ikzf1	0	2.37393	0.379	0.001	0	Macrophage	Ikzf1
Cd74	0	2.3645	0.406	0.001	0	Macrophage	Cd74
Itga4	0	2.36133	0.349	0.001	0	Macrophage	Itga4
Nedd9	0	2.35819	0.438	0.033	0	Macrophage	Nedd9
Plcl2	0	2.3571	0.465	0.03	0	Macrophage	Plcl2
Epsti1	0	2.27844	0.366	0.001	0	Macrophage	Epsti1
Adgre1	0	2.19718	0.29	0	0	Macrophage	Adgre1
Parp81	0	2.12474	0.39	0.03	0	Macrophage	Parp8
Lcp1	0	2.12082	0.341	0.002	0	Macrophage	Lcp1
Arhgap45	0	2.11748	0.395	0.001	0	Macrophage	Arhgap45
Myo1f	0	2.11514	0.36	0.001	0	Macrophage	Myo1f
Gas7	0	2.09848	0.339	0.009	0	Macrophage	Gas7
Fli1	0	2.00964	0.575	0.041	0	Macrophage	Fli1
Ctsc	0	1.9807	0.285	0.008	0	Macrophage	Ctsc
Pik3cd	0	1.95598	0.312	0.007	0	Macrophage	Pik3cd
Apbb1ip	0	1.91491	0.323	0.007	0	Macrophage	Apbb1ip
Stab1	0	1.9023	0.25	0.007	0	Macrophage	Stab1
Ly86	0	1.86558	0.28	0.003	0	Macrophage	Ly86
Abca91	0	1.8619	0.304	0.01	0	Macrophage	Abca9
Ciita	0	1.83179	0.269	0.001	0	Macrophage	Ciita
Gng2	0	1.83135	0.331	0.01	0	Macrophage	Gng2
Tbxas1	0	1.79745	0.272	0.006	0	Macrophage	Tbxas1
Pik3ap1	0	1.79595	0.277	0.001	0	Macrophage	Pik3ap1
H2-Eb1	0	1.77383	0.253	0.001	0	Macrophage	H2-Eb1
Cers6	0	1.74905	0.293	0.017	0	Macrophage	Cers6
St8sia4	0	1.67744	0.304	0.016	0	Macrophage	St8sia4
Ubash3b	0	1.6666	0.253	0.008	0	Macrophage	Ubash3b
Prex1	0	1.65378	0.304	0.018	0	Macrophage	Prex1
Tec	0	1.60221	0.253	0.005	0	Macrophage	Tec
Nfatc2	0	1.57225	0.253	0.009	0	Macrophage	Nfatc2
Arhgap30	0	1.53608	0.272	0	0	Macrophage	Arhgap30
Ccnd31	2.45632e-305	2.94236	0.53	0.06	4.4651e-301	Macrophage	Ccnd3
Cmip1	3.71152e-305	2.15883	0.543	0.061	6.74679e-301	Macrophage	Cmip
Trerf11	9.74399e-295	2.3134	0.352	0.026	1.77126e-290	Macrophage	Trerf1
Dock11	5.21475e-277	1.77358	0.371	0.031	9.47937e-273	Macrophage	Dock11
Iqgap2	2.51779e-271	2.21185	0.43	0.044	4.57684e-267	Macrophage	Iqgap2
Frmd4b1	1.62297e-263	2.62533	0.425	0.043	2.95024e-259	Macrophage	Frmd4b
Lyn	9.53984e-252	2.43136	0.513	0.068	1.73415e-247	Macrophage	Lyn
Apba11	2.64592e-248	1.85746	0.261	0.017	4.80975e-244	Macrophage	Apba1
Mef2c	1.88352e-246	1.98772	0.414	0.042	3.42385e-242	Macrophage	Mef2c
Rftn1	5.07566e-246	1.70416	0.36	0.032	9.22653e-242	Macrophage	Rftn1
Arhgap18	2.36321e-239	1.95177	0.379	0.037	4.29584e-235	Macrophage	Arhgap18
Sirpa	3.74583e-228	1.47542	0.277	0.021	6.80917e-224	Macrophage	Sirpa
Sp1001	4.21026e-221	1.60933	0.336	0.031	7.6534e-217	Macrophage	Sp100
Dock10	1.4163e-217	2.27683	0.489	0.069	2.57456e-213	Macrophage	Dock10
Wipf11	1.32945e-208	1.75958	0.435	0.054	2.41667e-204	Macrophage	Wipf1
Tanc21	3.19714e-204	2.46733	0.414	0.054	5.81177e-200	Macrophage	Tanc2
Rcsd1	3.64163e-203	1.47951	0.315	0.03	6.61976e-199	Macrophage	Rcsd1
Man1a1	1.11701e-184	2.21254	0.384	0.05	2.03051e-180	Macrophage	Man1a
Maf	1.30848e-181	2.14351	0.317	0.035	2.37856e-177	Macrophage	Maf
Hpcal1	6.21088e-176	1.67261	0.344	0.041	1.12901e-171	Macrophage	Hpcal1
Man1c11	1.37322e-170	1.62594	0.274	0.027	2.49624e-166	Macrophage	Man1c1
Trim30a	1.83393e-169	1.41061	0.253	0.023	3.33372e-165	Macrophage	Trim30a
Mndal	2.64607e-166	1.50921	0.255	0.024	4.81003e-162	Macrophage	Mndal
Adam191	2.48647e-165	1.51572	0.253	0.024	4.5199e-161	Macrophage	Adam19
Rbpj	1.34833e-161	4.02791	0.605	0.154	2.45099e-157	Macrophage	Rbpj
Serinc3	3.67007e-157	1.85699	0.444	0.076	6.67146e-153	Macrophage	Serinc3
Samhd1	2.12804e-144	1.62955	0.301	0.039	3.86834e-140	Macrophage	Samhd1
Akt31	1.48339e-142	1.52666	0.336	0.047	2.69651e-138	Macrophage	Akt3
Ankrd44	4.59243e-133	2.01834	0.696	0.218	8.34812e-129	Macrophage	Ankrd44
Atp2b11	1.64467e-130	2.13629	0.651	0.195	2.98968e-126	Macrophage	Atp2b1
Prkch	9.91393e-129	1.38942	0.269	0.033	1.80215e-124	Macrophage	Prkch
Rab8b	1.06843e-125	1.6456	0.398	0.074	1.94219e-121	Macrophage	Rab8b
Nav11	3.37477e-119	1.85548	0.454	0.097	6.13465e-115	Macrophage	Nav1
Dclre1c	2.32554e-118	1.61781	0.309	0.049	4.22737e-114	Macrophage	Dclre1c
Dock8	4.48324e-115	1.83856	0.497	0.123	8.14964e-111	Macrophage	Dock8
Bach2	7.35358e-111	2.47935	0.352	0.066	1.33673e-106	Macrophage	Bach2
Stk10	4.52959e-109	1.34135	0.255	0.036	8.23389e-105	Macrophage	Stk10
Bcl21	4.67418e-109	1.89895	0.269	0.039	8.49672e-105	Macrophage	Bcl2
Aff3	1.3172e-106	2.55974	0.341	0.065	2.39441e-102	Macrophage	Aff3
Dse	6.47986e-106	1.57473	0.25	0.035	1.17791e-101	Macrophage	Dse
Taok31	2.7373e-103	1.6373	0.478	0.121	4.97587e-99	Macrophage	Taok3
Fam49b	1.05923e-102	1.87922	0.672	0.25	1.92547e-98	Macrophage	Fam49b
Galnt10	2.32139e-102	1.33973	0.263	0.04	4.21982e-98	Macrophage	Galnt10
Unc93b1	1.34155e-99	1.32905	0.315	0.057	2.43866e-95	Macrophage	Unc93b1
Zswim61	6.02799e-90	1.91264	0.64	0.249	1.09577e-85	Macrophage	Zswim6
Pid11	2.65165e-88	2.69629	0.68	0.324	4.82018e-84	Macrophage	Pid1
Cd47	1.2638e-82	1.35418	0.317	0.067	2.29733e-78	Macrophage	Cd47
Tpd52	1.44498e-76	1.43582	0.29	0.061	2.62668e-72	Macrophage	Tpd52
B2m	1.88015e-76	1.30385	0.317	0.071	3.41774e-72	Macrophage	B2m
App1	3.62408e-75	1.84627	0.411	0.115	6.58785e-71	Macrophage	App
Rap1b	2.91452e-74	1.36099	0.379	0.101	5.29802e-70	Macrophage	Rap1b
Crlf3	1.3002e-70	1.33525	0.347	0.089	2.3635e-66	Macrophage	Crlf3
Camk1d1	1.13683e-68	1.33825	0.957	0.758	2.06652e-64	Macrophage	Camk1d
H2-D1	9.9507e-68	1.26102	0.274	0.06	1.80884e-63	Macrophage	H2-D1
Arhgap31	3.87004e-67	0.879633	0.29	0.063	7.03496e-63	Macrophage	Arhgap31
Cdc42se2	8.06777e-67	1.3167	0.333	0.086	1.46656e-62	Macrophage	Cdc42se2
Lrch11	1.74517e-64	1.30468	0.444	0.143	3.17236e-60	Macrophage	Lrch1
Phactr2	6.13005e-63	1.50995	0.304	0.077	1.11432e-58	Macrophage	Phactr2
Srgap21	6.92511e-63	1.36437	0.476	0.166	1.25885e-58	Macrophage	Srgap2
Psd31	1.25767e-61	2.2704	0.554	0.238	2.28619e-57	Macrophage	Psd3
Iqgap11	2.27182e-61	1.40508	0.47	0.173	4.12972e-57	Macrophage	Iqgap1
Acer3	3.42225e-60	1.46239	0.379	0.117	6.22097e-56	Macrophage	Acer3
Mbnl1	9.17994e-60	1.15394	0.911	0.733	1.66873e-55	Macrophage	Mbnl1
Apoe	9.03322e-58	1.48464	0.296	0.078	1.64206e-53	Macrophage	Apoe
Fchsd2	2.48202e-57	1.63956	0.403	0.136	4.51182e-53	Macrophage	Fchsd2
Zc3hav1	1.86829e-56	1.16538	0.272	0.067	3.39618e-52	Macrophage	Zc3hav1
Arhgef3	3.60363e-56	1.68056	0.352	0.108	6.55067e-52	Macrophage	Arhgef3
Maml21	9.72948e-56	1.54686	0.556	0.235	1.76862e-51	Macrophage	Maml2
Actb	6.69615e-55	1.62914	0.374	0.118	1.21723e-50	Macrophage	Actb
Snx8	1.60799e-54	1.07135	0.25	0.059	2.923e-50	Macrophage	Snx8
Msn	1.14798e-53	1.14521	0.328	0.095	2.0868e-49	Macrophage	Msn
Casp8	7.78834e-53	0.888025	0.253	0.061	1.41576e-48	Macrophage	Casp8
Foxp1	8.15248e-53	1.44047	0.882	0.724	1.48196e-48	Macrophage	Foxp1
Fnbp1	3.36688e-52	1.35702	0.71	0.404	6.12031e-48	Macrophage	Fnbp1
Myo5a	2.69507e-51	1.49177	0.503	0.214	4.89909e-47	Macrophage	Myo5a
Snx5	3.07171e-51	1.20733	0.269	0.071	5.58376e-47	Macrophage	Snx5
St6gal1	2.95712e-49	1.34244	0.366	0.124	5.37545e-45	Macrophage	St6gal1
Rasa31	2.66822e-48	1.06265	0.301	0.086	4.85028e-44	Macrophage	Rasa3
Il6ra	5.57973e-47	1.35622	0.368	0.13	1.01428e-42	Macrophage	Il6ra
Snx30	8.53306e-45	1.07047	0.255	0.07	1.55114e-40	Macrophage	Snx30
Ripor2	2.9735e-44	1.98418	0.352	0.126	5.40523e-40	Macrophage	Ripor2
Snx2	4.09145e-43	1.28549	0.411	0.164	7.43745e-39	Macrophage	Snx2
Itpkb	6.64262e-43	1.01991	0.387	0.14	1.2075e-38	Macrophage	Itpkb
Slc12a6	4.71762e-42	1.24121	0.505	0.239	8.57568e-38	Macrophage	Slc12a6
Zeb21	2.81502e-40	1.53926	0.78	0.625	5.11714e-36	Macrophage	Zeb2
Antxr21	1.41427e-39	1.11327	0.323	0.111	2.57087e-35	Macrophage	Antxr2
Dennd1a1	8.98158e-38	1.16055	0.769	0.551	1.63267e-33	Macrophage	Dennd1a
Rap1a1	2.23968e-37	1.09099	0.435	0.191	4.07128e-33	Macrophage	Rap1a
Arhgap171	2.56359e-37	1.12445	0.392	0.162	4.6601e-33	Macrophage	Arhgap17
Ncoa3	7.59992e-37	1.0062	0.341	0.126	1.38151e-32	Macrophage	Ncoa3
Gab21	3.94947e-36	1.29843	0.543	0.293	7.17934e-32	Macrophage	Gab2
Ppp3ca1	1.09572e-35	1.02681	0.785	0.606	1.9918e-31	Macrophage	Ppp3ca
Bmp2k	7.75053e-35	1.03661	0.344	0.133	1.40889e-30	Macrophage	Bmp2k
H2-K1	9.46403e-35	1.01995	0.446	0.202	1.72037e-30	Macrophage	H2-K1
Tsc22d11	7.31632e-34	1.11376	0.341	0.133	1.32996e-29	Macrophage	Tsc22d1
Plekhm3	9.2072e-34	1.11903	0.349	0.143	1.67368e-29	Macrophage	Plekhm3
Arhgap39	3.55689e-33	1.19365	0.312	0.122	6.46572e-29	Macrophage	Arhgap39
Gtdc1	5.30994e-33	1.04823	0.331	0.129	9.65242e-29	Macrophage	Gtdc1
Arpc2	5.48489e-33	1.04002	0.309	0.117	9.97044e-29	Macrophage	Arpc2
Pitpna	5.79278e-33	1.01933	0.411	0.186	1.05301e-28	Macrophage	Pitpna
Wwp1	7.82333e-33	1.66832	0.457	0.239	1.42212e-28	Macrophage	Wwp1
Dip2b1	3.28606e-32	1.04719	0.422	0.194	5.9734e-28	Macrophage	Dip2b
Wasf21	1.17014e-31	1.01284	0.444	0.213	2.12708e-27	Macrophage	Wasf2
Grb2	1.31974e-31	0.976804	0.403	0.181	2.39903e-27	Macrophage	Grb2
Cbl	1.46853e-31	0.962947	0.478	0.245	2.6695e-27	Macrophage	Cbl
Rtn41	2.01237e-31	1.12124	0.454	0.225	3.65808e-27	Macrophage	Rtn4
Notch21	2.53683e-30	1.12223	0.427	0.208	4.61144e-26	Macrophage	Notch2
Ap2a2	6.75704e-30	1.103	0.366	0.161	1.2283e-25	Macrophage	Ap2a2
Stk4	8.743e-30	0.852691	0.301	0.116	1.5893e-25	Macrophage	Stk4
Rnf130	1.50278e-29	1.02665	0.28	0.106	2.73175e-25	Macrophage	Rnf130
Tet3	2.15231e-29	1.0523	0.538	0.31	3.91247e-25	Macrophage	Tet3
Myo9b	4.10714e-29	0.935851	0.274	0.102	7.46596e-25	Macrophage	Myo9b
Snx291	4.50102e-29	1.23762	0.548	0.34	8.18195e-25	Macrophage	Snx29
Ptbp31	4.80169e-29	0.961862	0.433	0.212	8.72851e-25	Macrophage	Ptbp3
Hlcs	7.47261e-29	1.13531	0.306	0.125	1.35837e-24	Macrophage	Hlcs
Tpm3	1.09503e-28	0.858504	0.274	0.103	1.99054e-24	Macrophage	Tpm3
Ppp1r21	1.30003e-28	0.922573	0.266	0.099	2.3632e-24	Macrophage	Ppp1r21
Vrk2	3.0555e-28	0.985372	0.274	0.105	5.55429e-24	Macrophage	Vrk2
Actr3	1.30321e-27	0.895806	0.441	0.223	2.36898e-23	Macrophage	Actr3
Trps1	2.4451e-27	1.05811	0.661	0.459	4.4447e-23	Macrophage	Trps1
Washc4	3.34024e-27	0.90271	0.325	0.14	6.07188e-23	Macrophage	Washc4
Tle4	3.63673e-27	0.920898	0.339	0.147	6.61085e-23	Macrophage	Tle4
Ext11	3.65811e-27	1.06015	0.742	0.572	6.64971e-23	Macrophage	Ext1
Pias11	1.62157e-26	0.976667	0.492	0.275	2.94768e-22	Macrophage	Pias1
Synj1	2.13728e-26	0.902062	0.374	0.175	3.88514e-22	Macrophage	Synj1
Fndc3a	5.29416e-26	0.99378	0.465	0.253	9.62373e-22	Macrophage	Fndc3a
Gls1	5.52931e-26	0.83879	0.306	0.128	1.00512e-21	Macrophage	Gls
Inpp4a	5.93351e-26	0.980861	0.277	0.111	1.07859e-21	Macrophage	Inpp4a
Fam172a1	8.47127e-26	0.910965	0.675	0.47	1.53991e-21	Macrophage	Fam172a
P2rx4	2.63335e-25	0.838782	0.25	0.094	4.78691e-21	Macrophage	P2rx4
Phip1	1.77486e-24	0.869996	0.433	0.225	3.22633e-20	Macrophage	Phip
Itm2b	2.12347e-24	0.989726	0.379	0.192	3.86004e-20	Macrophage	Itm2b
Mapk14	8.35249e-24	0.814738	0.522	0.309	1.51832e-19	Macrophage	Mapk14
Wnk1	2.71155e-23	0.836641	0.704	0.508	4.92906e-19	Macrophage	Wnk1
Fam129a1	3.3435e-23	1.14825	0.325	0.152	6.07782e-19	Macrophage	Fam129a
Pan31	3.79229e-23	0.775837	0.672	0.463	6.89362e-19	Macrophage	Pan3
Sgk3	9.00447e-23	0.884173	0.366	0.185	1.63683e-18	Macrophage	Sgk3
Irf21	9.08774e-23	1.00962	0.478	0.281	1.65197e-18	Macrophage	Irf2
Cdk19	1.28758e-22	0.818763	0.285	0.123	2.34057e-18	Macrophage	Cdk19
Lims11	1.49884e-22	0.769719	0.449	0.242	2.7246e-18	Macrophage	Lims1
Mdfic	1.59751e-22	0.948761	0.266	0.112	2.90395e-18	Macrophage	Mdfic
Eps151	1.64689e-22	0.944035	0.406	0.22	2.99372e-18	Macrophage	Eps15
Tmcc1	5.50568e-22	1.06206	0.712	0.582	1.00082e-17	Macrophage	Tmcc1
Actr2	9.24731e-22	0.846344	0.312	0.146	1.68098e-17	Macrophage	Actr2
Peli1	1.0978e-21	1.11342	0.341	0.172	1.99559e-17	Macrophage	Peli1
Fam107b	1.50864e-21	0.941927	0.298	0.136	2.7424e-17	Macrophage	Fam107b
Ssh21	2.26532e-21	0.894848	0.64	0.451	4.11789e-17	Macrophage	Ssh2
Btbd9	2.35246e-21	0.836935	0.589	0.388	4.27629e-17	Macrophage	Btbd9
Kdm7a	3.71819e-21	0.863402	0.387	0.206	6.75893e-17	Macrophage	Kdm7a
Rnf169	5.49957e-21	0.964845	0.403	0.225	9.99712e-17	Macrophage	Rnf169
Klf3	5.60977e-21	0.881715	0.298	0.137	1.01974e-16	Macrophage	Klf3
Herc41	9.77444e-21	0.870373	0.468	0.278	1.7768e-16	Macrophage	Herc4
Arhgef18	2.31814e-20	1.13851	0.325	0.163	4.21392e-16	Macrophage	Arhgef18
Jak11	7.14233e-20	0.837571	0.487	0.295	1.29833e-15	Macrophage	Jak1
Zdhhc14	1.10485e-19	1.25672	0.46	0.283	2.00839e-15	Macrophage	Zdhhc14
Dennd1b1	2.11175e-19	0.897586	0.401	0.227	3.83874e-15	Macrophage	Dennd1b
Pacsin2	3.14433e-19	0.867643	0.323	0.16	5.71576e-15	Macrophage	Pacsin2
Rapgef61	4.91264e-19	0.934464	0.417	0.241	8.93019e-15	Macrophage	Rapgef6
Cdk141	6.335e-19	1.14734	0.468	0.299	1.15158e-14	Macrophage	Cdk14
Eif4g31	7.45579e-19	0.71323	0.505	0.313	1.35531e-14	Macrophage	Eif4g3
Lifr1	7.53701e-19	1.02803	0.32	0.166	1.37008e-14	Macrophage	Lifr
Hip1	1.43351e-18	0.75878	0.274	0.126	2.60584e-14	Macrophage	Hip1
Tbc1d5	3.41403e-18	0.707932	0.71	0.533	6.20602e-14	Macrophage	Tbc1d5
Susd61	4.33985e-18	0.745153	0.444	0.261	7.88897e-14	Macrophage	Susd6
Pbx3	6.6328e-18	0.840588	0.282	0.135	1.20571e-13	Macrophage	Pbx3
Ptp4a21	8.3605e-18	0.752027	0.411	0.236	1.51977e-13	Macrophage	Ptp4a2
Osbpl8	1.22094e-17	0.835199	0.417	0.245	2.21943e-13	Macrophage	Osbpl8
Skap2	1.25088e-17	0.903502	0.519	0.362	2.27384e-13	Macrophage	Skap2
Cltc1	1.47547e-17	0.857052	0.406	0.239	2.68212e-13	Macrophage	Cltc
Exoc41	1.99082e-17	0.649794	0.707	0.569	3.61892e-13	Macrophage	Exoc4
Rap1gds1	2.16347e-17	0.875102	0.468	0.299	3.93275e-13	Macrophage	Rap1gds1
Vps13b	2.18526e-17	0.737761	0.702	0.554	3.97236e-13	Macrophage	Vps13b
Gnaq1	2.7541e-17	0.924884	0.624	0.484	5.00641e-13	Macrophage	Gnaq
Mitf1	3.31479e-17	1.17746	0.457	0.292	6.02562e-13	Macrophage	Mitf
Tut41	9.90205e-17	0.823606	0.363	0.2	1.79999e-12	Macrophage	Tut4
Diaph1	1.04966e-16	0.814629	0.352	0.195	1.90808e-12	Macrophage	Diaph1
Arap1	1.13628e-16	0.69672	0.261	0.123	2.06553e-12	Macrophage	Arap1
Abi11	1.23881e-16	0.747191	0.5	0.327	2.2519e-12	Macrophage	Abi1
Tmem164	1.78289e-16	0.763517	0.546	0.365	3.24094e-12	Macrophage	Tmem164
Myh91	2.24311e-16	0.759598	0.317	0.166	4.07752e-12	Macrophage	Myh9
Ccm21	3.91579e-16	0.779393	0.355	0.198	7.11812e-12	Macrophage	Ccm2
Stk241	3.94834e-16	0.878379	0.301	0.158	7.1773e-12	Macrophage	Stk24
Rnf150	1.14868e-15	0.972835	0.578	0.431	2.08808e-11	Macrophage	Rnf150
Picalm	1.52665e-15	0.619793	0.669	0.509	2.77514e-11	Macrophage	Picalm
Asap11	1.5985e-15	0.736477	0.594	0.428	2.90575e-11	Macrophage	Asap1
Ankfy1	1.9115e-15	0.706093	0.29	0.15	3.47472e-11	Macrophage	Ankfy1
Pak2	2.62608e-15	0.70383	0.411	0.25	4.77369e-11	Macrophage	Pak2
Enox2	3.38216e-15	0.781773	0.519	0.351	6.14809e-11	Macrophage	Enox2
Smchd1	4.24683e-15	0.706827	0.379	0.22	7.7199e-11	Macrophage	Smchd1
Sgms1	4.4521e-15	0.659765	0.556	0.379	8.09302e-11	Macrophage	Sgms1
Fcho2	9.32634e-15	0.749778	0.5	0.347	1.69534e-10	Macrophage	Fcho2
Arhgap101	1.00153e-14	0.619286	0.309	0.164	1.82058e-10	Macrophage	Arhgap10
Zfp710	1.1053e-14	0.884487	0.484	0.335	2.00921e-10	Macrophage	Zfp710
Cdc421	1.44396e-14	0.70733	0.406	0.25	2.62483e-10	Macrophage	Cdc42
Mrtfa1	1.65331e-14	0.710044	0.433	0.272	3.00538e-10	Macrophage	Mrtfa
Dennd4a	2.38385e-14	0.994693	0.36	0.215	4.33336e-10	Macrophage	Dennd4a
Aff11	2.46011e-14	0.682485	0.462	0.295	4.47199e-10	Macrophage	Aff1
Eml4	2.75297e-14	0.726573	0.28	0.145	5.00435e-10	Macrophage	Eml4
Gna12	3.26248e-14	0.762138	0.277	0.148	5.93054e-10	Macrophage	Gna12
Fkbp51	5.14029e-14	0.872535	0.266	0.134	9.34401e-10	Macrophage	Fkbp5
Uvrag1	5.45784e-14	0.835051	0.435	0.291	9.92126e-10	Macrophage	Uvrag
Ncoa2	6.08953e-14	0.544913	0.715	0.553	1.10695e-09	Macrophage	Ncoa2
Man2a11	6.879e-14	0.887025	0.368	0.226	1.25046e-09	Macrophage	Man2a1
Ahnak1	9.09614e-14	0.846317	0.505	0.345	1.6535e-09	Macrophage	Ahnak
Svil1	1.51872e-13	0.683535	0.374	0.224	2.76073e-09	Macrophage	Svil
Zfp36l2	1.7673e-13	0.793185	0.253	0.131	3.21259e-09	Macrophage	Zfp36l2
Arid5b	1.87596e-13	0.819033	0.376	0.23	3.41012e-09	Macrophage	Arid5b
Foxo31	1.89472e-13	0.728927	0.347	0.203	3.44423e-09	Macrophage	Foxo3
Itsn11	2.45598e-13	0.839663	0.535	0.396	4.46448e-09	Macrophage	Itsn1
Cnot6l	4.51788e-13	0.641171	0.306	0.172	8.2126e-09	Macrophage	Cnot6l
Nek7	9.29139e-13	0.70926	0.368	0.223	1.68899e-08	Macrophage	Nek7
Atf7ip1	9.37714e-13	0.673159	0.438	0.285	1.70458e-08	Macrophage	Atf7ip
Ostf1	1.63077e-12	0.634373	0.25	0.129	2.96441e-08	Macrophage	Ostf1
Foxn3	2.85406e-12	0.591803	0.836	0.734	5.18811e-08	Macrophage	Foxn3
Dyrk1a	2.95666e-12	0.487991	0.581	0.439	5.37462e-08	Macrophage	Dyrk1a
Snx13	4.62334e-12	0.612206	0.374	0.233	8.40431e-08	Macrophage	Snx13
Gdi2	4.74526e-12	0.616018	0.344	0.207	8.62593e-08	Macrophage	Gdi2
Ctsb1	6.02809e-12	0.745936	0.371	0.234	1.09579e-07	Macrophage	Ctsb
Add31	6.06091e-12	0.751377	0.516	0.383	1.10175e-07	Macrophage	Add3
Slc43a2	6.13941e-12	0.620716	0.309	0.176	1.11602e-07	Macrophage	Slc43a2
Mob3b	6.45563e-12	0.633061	0.293	0.165	1.1735e-07	Macrophage	Mob3b
Abhd12	7.22404e-12	0.693093	0.285	0.161	1.31319e-07	Macrophage	Abhd12
Tnfaip81	1.13841e-11	0.550977	0.546	0.394	2.0694e-07	Macrophage	Tnfaip8
Clint11	1.36999e-11	0.580243	0.417	0.275	2.49036e-07	Macrophage	Clint1
Cyfip11	2.03417e-11	0.560487	0.274	0.151	3.69771e-07	Macrophage	Cyfip1
Htt	2.19474e-11	0.651406	0.298	0.177	3.98961e-07	Macrophage	Htt
Tab2	2.25679e-11	0.614012	0.349	0.218	4.1024e-07	Macrophage	Tab2
Sbf21	2.56343e-11	0.752281	0.476	0.346	4.65981e-07	Macrophage	Sbf2
St3gal41	2.99712e-11	0.680707	0.29	0.167	5.44817e-07	Macrophage	St3gal4
Fam13b1	3.04248e-11	0.64247	0.301	0.179	5.53061e-07	Macrophage	Fam13b
Slc23a21	3.35663e-11	0.66203	0.269	0.15	6.10169e-07	Macrophage	Slc23a2
Peak11	3.56135e-11	0.57812	0.441	0.298	6.47383e-07	Macrophage	Peak1
Myo9a1	3.72363e-11	0.779763	0.32	0.2	6.76882e-07	Macrophage	Myo9a
Igf1r1	4.7788e-11	0.719356	0.317	0.19	8.68691e-07	Macrophage	Igf1r
Tut7	7.7006e-11	0.64715	0.323	0.2	1.39981e-06	Macrophage	Tut7
Mgat5	1.07951e-10	0.732049	0.301	0.185	1.96233e-06	Macrophage	Mgat5
Etv6	1.16478e-10	0.608484	0.688	0.602	2.11734e-06	Macrophage	Etv6
Fam49a1	1.36078e-10	0.54301	0.36	0.224	2.47362e-06	Macrophage	Fam49a
Glg11	1.40138e-10	0.505183	0.344	0.215	2.54743e-06	Macrophage	Glg1
Stag11	1.78737e-10	0.508973	0.575	0.439	3.24909e-06	Macrophage	Stag1
Exoc6b1	2.0287e-10	0.595444	0.535	0.393	3.68777e-06	Macrophage	Exoc6b
Cask1	2.09406e-10	0.645051	0.347	0.217	3.80658e-06	Macrophage	Cask
Arid1a	7.72933e-10	0.455106	0.524	0.383	1.40504e-05	Macrophage	Arid1a
Shtn1	8.25047e-10	0.517006	0.333	0.21	1.49977e-05	Macrophage	Shtn1
Elf11	8.30971e-10	0.608834	0.454	0.325	1.51054e-05	Macrophage	Elf1
Sash11	8.66646e-10	0.655728	0.255	0.147	1.57539e-05	Macrophage	Sash1
Acap21	1.03472e-09	0.558462	0.392	0.263	1.88092e-05	Macrophage	Acap2
Cep1701	1.13252e-09	0.670218	0.331	0.213	2.05869e-05	Macrophage	Cep170
Vav2	1.34868e-09	0.581848	0.301	0.183	2.45164e-05	Macrophage	Vav2
Arid4a	1.35741e-09	0.625714	0.382	0.256	2.4675e-05	Macrophage	Arid4a
Rasa1	1.78645e-09	0.614105	0.352	0.231	3.2474e-05	Macrophage	Rasa1
Zdhhc20	2.37803e-09	0.50911	0.309	0.191	4.32279e-05	Macrophage	Zdhhc20
Map41	2.39681e-09	0.279488	0.309	0.186	4.35692e-05	Macrophage	Map4
Rnf13	2.60939e-09	0.600382	0.272	0.165	4.74334e-05	Macrophage	Rnf13
Tnrc181	2.9651e-09	0.618764	0.253	0.151	5.38996e-05	Macrophage	Tnrc18
Sppl3	3.38822e-09	0.512542	0.438	0.308	6.1591e-05	Macrophage	Sppl3
Ptk2b	3.62002e-09	0.687398	0.315	0.204	6.58046e-05	Macrophage	Ptk2b
Tmcc31	3.63615e-09	0.779196	0.425	0.304	6.60979e-05	Macrophage	Tmcc3
Tmem131l1	4.22843e-09	0.564646	0.411	0.285	7.68643e-05	Macrophage	Tmem131l
Chd21	4.71434e-09	0.505538	0.551	0.438	8.56974e-05	Macrophage	Chd2
Prdm2	5.84382e-09	0.471787	0.309	0.195	0.000106229	Macrophage	Prdm2
Nfkb11	6.32378e-09	0.554352	0.358	0.238	0.000114954	Macrophage	Nfkb1
Cept1	7.48915e-09	0.498022	0.282	0.176	0.000136138	Macrophage	Cept1
Akap131	8.62384e-09	0.523846	0.702	0.622	0.000156764	Macrophage	Akap13
Creb1	9.60117e-09	0.592338	0.347	0.235	0.00017453	Macrophage	Creb1
Ndfip11	1.0403e-08	0.538998	0.255	0.154	0.000189106	Macrophage	Ndfip1
Wdfy31	1.0633e-08	0.655287	0.457	0.341	0.000193287	Macrophage	Wdfy3
Aftph	1.07798e-08	0.516898	0.371	0.259	0.000195955	Macrophage	Aftph
Abcc1	1.14185e-08	0.581672	0.263	0.159	0.000207566	Macrophage	Abcc1
Dipk1a	1.34529e-08	0.610151	0.255	0.155	0.000244547	Macrophage	Dipk1a
Rb1	1.35674e-08	0.597544	0.406	0.29	0.000246629	Macrophage	Rb1
BC005537	1.49957e-08	0.584221	0.333	0.225	0.000272591	Macrophage	BC005537
Ptpra1	1.71119e-08	0.559354	0.323	0.212	0.000311059	Macrophage	Ptpra
Mta31	1.72443e-08	0.529528	0.315	0.205	0.000313467	Macrophage	Mta3
Cog5	1.95287e-08	0.556416	0.403	0.289	0.000354993	Macrophage	Cog5
Sp31	3.86484e-08	0.595046	0.301	0.199	0.000702551	Macrophage	Sp3
Tcf20	4.21181e-08	0.628609	0.414	0.305	0.000765622	Macrophage	Tcf20
Spopl	4.41492e-08	0.546241	0.253	0.157	0.000802544	Macrophage	Spopl
Traf3	4.5297e-08	0.626128	0.298	0.194	0.000823408	Macrophage	Traf3
Thada1	4.80385e-08	0.674629	0.355	0.244	0.000873244	Macrophage	Thada
Ust1	4.89167e-08	0.626944	0.339	0.227	0.000889207	Macrophage	Ust
Atf6	5.0236e-08	0.580908	0.452	0.33	0.00091319	Macrophage	Atf6
Dapk11	5.27498e-08	0.580731	0.258	0.159	0.000958885	Macrophage	Dapk1
Fbxw7	6.60317e-08	0.522026	0.36	0.249	0.00120032	Macrophage	Fbxw7
Ppp4r1	7.06001e-08	0.510974	0.277	0.177	0.00128337	Macrophage	Ppp4r1
Sh3bgrl	7.25212e-08	0.513175	0.371	0.259	0.00131829	Macrophage	Sh3bgrl
Fryl	7.25366e-08	0.517542	0.422	0.31	0.00131857	Macrophage	Fryl
Ddx6	7.52967e-08	0.548571	0.39	0.279	0.00136874	Macrophage	Ddx6
Xrcc4	8.0916e-08	0.591214	0.261	0.165	0.00147089	Macrophage	Xrcc4
Tent2	8.10384e-08	0.51601	0.331	0.228	0.00147312	Macrophage	Tent2
Mllt3	8.15487e-08	0.737773	0.341	0.233	0.00148239	Macrophage	Mllt3
Itsn2	8.65375e-08	0.495069	0.505	0.393	0.00157308	Macrophage	Itsn2
Phf21a1	1.11506e-07	0.515761	0.618	0.52	0.00202696	Macrophage	Phf21a
Rsu11	1.21999e-07	0.48516	0.349	0.24	0.0022177	Macrophage	Rsu1
Nsf	1.27411e-07	0.537261	0.296	0.197	0.00231607	Macrophage	Nsf
Atp8a1	1.39821e-07	0.409338	0.524	0.4	0.00254167	Macrophage	Atp8a1
Apc	1.67599e-07	0.438102	0.409	0.292	0.00304662	Macrophage	Apc
Dleu21	2.0717e-07	0.305454	0.815	0.713	0.00376594	Macrophage	Dleu2
Capzb	2.4647e-07	0.649947	0.306	0.211	0.00448033	Macrophage	Capzb
Maml31	2.5951e-07	0.419673	0.368	0.258	0.00471738	Macrophage	Maml3
Ascc31	2.60458e-07	0.489576	0.331	0.227	0.00473461	Macrophage	Ascc3
Snd11	2.60586e-07	0.474109	0.454	0.353	0.00473692	Macrophage	Snd1
Wdfy21	2.63099e-07	0.649637	0.384	0.286	0.00478262	Macrophage	Wdfy2
Relch	2.8296e-07	0.475791	0.341	0.235	0.00514364	Macrophage	Relch
Ccdc88a	2.85991e-07	0.498305	0.349	0.243	0.00519875	Macrophage	Ccdc88a
Arhgef1	3.43949e-07	0.508467	0.285	0.191	0.00625231	Macrophage	Arhgef1
Erbin1	3.55524e-07	0.423611	0.395	0.289	0.00646271	Macrophage	Erbin
Hnrnpf	3.9223e-07	0.420588	0.258	0.164	0.00712995	Macrophage	Hnrnpf
Kdm3b	4.1309e-07	0.458829	0.296	0.198	0.00750914	Macrophage	Kdm3b
Mtmr31	4.25337e-07	0.422254	0.538	0.425	0.00773177	Macrophage	Mtmr3
Baz2b	5.12203e-07	0.454522	0.672	0.614	0.00931082	Macrophage	Baz2b
Ywhaz	8.94857e-07	0.425821	0.274	0.179	0.0162667	Macrophage	Ywhaz
Tgfbr2	9.11453e-07	0.445149	0.473	0.361	0.0165684	Macrophage	Tgfbr2
Itgb11	1.09493e-06	0.625028	0.255	0.168	0.0199036	Macrophage	Itgb1
Pik3ca1	1.14204e-06	0.501399	0.328	0.235	0.02076	Macrophage	Pik3ca
Specc1l	1.26619e-06	0.502217	0.296	0.205	0.0230168	Macrophage	Specc1l
Smyd3	1.34886e-06	0.448053	0.613	0.513	0.0245195	Macrophage	Smyd3
Galnt1	1.37728e-06	0.490597	0.255	0.167	0.0250362	Macrophage	Galnt1
Pik3c2a	1.38124e-06	0.483021	0.36	0.258	0.0251083	Macrophage	Pik3c2a
Vps54	1.46098e-06	0.456822	0.411	0.31	0.0265578	Macrophage	Vps54
Rsrc11	1.63972e-06	0.473092	0.425	0.32	0.0298067	Macrophage	Rsrc1
Mbd21	1.67484e-06	0.452083	0.255	0.169	0.0304452	Macrophage	Mbd2
Slc38a9	1.77852e-06	0.428222	0.261	0.172	0.03233	Macrophage	Slc38a9
Fnip2	1.96505e-06	0.690395	0.277	0.189	0.0357207	Macrophage	Fnip2
Map2k1	1.99884e-06	0.437008	0.285	0.192	0.0363349	Macrophage	Map2k1
Snx241	2.26113e-06	0.622142	0.25	0.165	0.0411028	Macrophage	Snx24
Ankrd11	2.28057e-06	0.377746	0.815	0.737	0.0414562	Macrophage	Ankrd11
Cpsf6	2.40276e-06	0.378292	0.371	0.27	0.0436774	Macrophage	Cpsf6
Atg7	2.7088e-06	0.476469	0.298	0.208	0.0492406	Macrophage	Atg7
Flt1	0	4.62961	0.844	0.002	0	Endothelial Cell	Flt1
Fli11	0	4.35312	0.825	0.015	0	Endothelial Cell	Fli1
Etl4	0	4.27171	0.826	0.021	0	Endothelial Cell	Etl4
Cyyr1	0	4.23569	0.751	0.002	0	Endothelial Cell	Cyyr1
Ccdc85a	0	4.21765	0.702	0.008	0	Endothelial Cell	Ccdc85a
Cdh13	0	4.11722	0.828	0.067	0	Endothelial Cell	Cdh13
Prkch1	0	3.95657	0.771	0.005	0	Endothelial Cell	Prkch
Arhgap311	0	3.95582	0.792	0.035	0	Endothelial Cell	Arhgap31
Itpkb1	0	3.89847	0.83	0.114	0	Endothelial Cell	Itpkb
Bmp6	0	3.7315	0.613	0.004	0	Endothelial Cell	Bmp6
Magi11	0	3.71568	0.863	0.132	0	Endothelial Cell	Magi1
Mcc1	0	3.70903	0.672	0.017	0	Endothelial Cell	Mcc
Pkp4	0	3.69819	0.739	0.043	0	Endothelial Cell	Pkp4
Sema6a	0	3.67792	0.671	0.011	0	Endothelial Cell	Sema6a
Ablim3	0	3.65342	0.678	0.002	0	Endothelial Cell	Ablim3
Adgrf5	0	3.65233	0.728	0.014	0	Endothelial Cell	Adgrf5
Ptprb	0	3.64537	0.695	0.002	0	Endothelial Cell	Ptprb
Dach1	0	3.52905	0.579	0.002	0	Endothelial Cell	Dach1
Apbb21	0	3.48991	0.808	0.088	0	Endothelial Cell	Apbb2
Adgrl4	0	3.45946	0.637	0.001	0	Endothelial Cell	Adgrl4
Fbxl71	0	3.4551	0.69	0.04	0	Endothelial Cell	Fbxl7
Lnx1	0	3.45062	0.609	0.002	0	Endothelial Cell	Lnx1
Shank3	0	3.4206	0.703	0.01	0	Endothelial Cell	Shank3
St6galnac3	0	3.32524	0.396	0.002	0	Endothelial Cell	St6galnac3
Adamts9	0	3.14716	0.679	0.106	0	Endothelial Cell	Adamts9
Kitl	0	3.14671	0.568	0.012	0	Endothelial Cell	Kitl
Ldb21	0	3.12075	0.523	0.018	0	Endothelial Cell	Ldb2
Mcf2l	0	3.11419	0.553	0.002	0	Endothelial Cell	Mcf2l
Egfl7	0	3.0258	0.608	0.001	0	Endothelial Cell	Egfl7
Myo1d	0	2.99194	0.59	0.024	0	Endothelial Cell	Myo1d
Elmo12	0	2.98714	0.617	0.026	0	Endothelial Cell	Elmo1
Pecam1	0	2.97888	0.558	0.008	0	Endothelial Cell	Pecam1
Itga6	0	2.958	0.55	0.01	0	Endothelial Cell	Itga6
Dgkh	0	2.92024	0.643	0.051	0	Endothelial Cell	Dgkh
Zfp366	0	2.91926	0.462	0.001	0	Endothelial Cell	Zfp366
Rftn11	0	2.8692	0.524	0.016	0	Endothelial Cell	Rftn1
Myo10	0	2.81048	0.64	0.111	0	Endothelial Cell	Myo10
Eng	0	2.75421	0.546	0.011	0	Endothelial Cell	Eng
Mecom1	0	2.69662	0.709	0.25	0	Endothelial Cell	Mecom
Ushbp1	0	2.6966	0.534	0.001	0	Endothelial Cell	Ushbp1
Vav32	0	2.67102	0.499	0.02	0	Endothelial Cell	Vav3
Nav12	0	2.64563	0.628	0.079	0	Endothelial Cell	Nav1
Arhgap181	0	2.63203	0.469	0.024	0	Endothelial Cell	Arhgap18
Gfod1	0	2.61033	0.538	0.079	0	Endothelial Cell	Gfod1
Cdh5	0	2.58475	0.476	0.001	0	Endothelial Cell	Cdh5
Btnl9	0	2.58351	0.424	0.001	0	Endothelial Cell	Btnl9
Lims2	0	2.58093	0.633	0.11	0	Endothelial Cell	Lims2
Nxn	0	2.56759	0.432	0.021	0	Endothelial Cell	Nxn
Lrrc8c	0	2.56497	0.409	0.012	0	Endothelial Cell	Lrrc8c
Plpp1	0	2.54751	0.428	0.021	0	Endothelial Cell	Plpp1
Rapgef5	0	2.52203	0.472	0.025	0	Endothelial Cell	Rapgef5
Adgrl2	0	2.51323	0.432	0.008	0	Endothelial Cell	Adgrl2
Tanc11	0	2.5127	0.686	0.149	0	Endothelial Cell	Tanc1
Slc28a2	0	2.50666	0.439	0.002	0	Endothelial Cell	Slc28a2
Rasal21	0	2.50583	0.714	0.2	0	Endothelial Cell	Rasal2
Samd12	0	2.49756	0.367	0.001	0	Endothelial Cell	Samd12
Plpp31	0	2.4904	0.568	0.102	0	Endothelial Cell	Plpp3
Dysf	0	2.48216	0.596	0.107	0	Endothelial Cell	Dysf
Stxbp61	0	2.46931	0.396	0.028	0	Endothelial Cell	Stxbp6
Aqp1	0	2.46019	0.392	0.001	0	Endothelial Cell	Aqp1
Afap1l1	0	2.45601	0.448	0.004	0	Endothelial Cell	Afap1l1
Auts21	0	2.45522	0.61	0.086	0	Endothelial Cell	Auts2
Tshz21	0	2.44158	0.665	0.16	0	Endothelial Cell	Tshz2
Klf71	0	2.43389	0.566	0.08	0	Endothelial Cell	Klf7
Kdr	0	2.42694	0.422	0.001	0	Endothelial Cell	Kdr
Tspan7	0	2.42609	0.389	0.016	0	Endothelial Cell	Tspan7
Galnt18	0	2.39552	0.597	0.169	0	Endothelial Cell	Galnt18
Gm12002	0	2.39158	0.329	0.001	0	Endothelial Cell	Gm12002
Epb41l4a	0	2.38641	0.369	0.001	0	Endothelial Cell	Epb41l4a
Igfbp71	0	2.37851	0.387	0.045	0	Endothelial Cell	Igfbp7
Rin3	0	2.35125	0.409	0.009	0	Endothelial Cell	Rin3
Rasgrp3	0	2.33796	0.4	0.007	0	Endothelial Cell	Rasgrp3
Ets1	0	2.29117	0.486	0.034	0	Endothelial Cell	Ets1
Fgd5	0	2.29099	0.439	0.007	0	Endothelial Cell	Fgd5
Slfn51	0	2.28979	0.435	0.02	0	Endothelial Cell	Slfn5
Pdgfb	0	2.28499	0.408	0.001	0	Endothelial Cell	Pdgfb
Tek	0	2.28456	0.427	0.007	0	Endothelial Cell	Tek
Plekhg1	0	2.28073	0.385	0.006	0	Endothelial Cell	Plekhg1
Schip1	0	2.27891	0.359	0.014	0	Endothelial Cell	Schip1
Erg	0	2.27575	0.421	0.001	0	Endothelial Cell	Erg
Jam2	0	2.2663	0.396	0.004	0	Endothelial Cell	Jam2
Lyn1	0	2.25682	0.478	0.056	0	Endothelial Cell	Lyn
Ptprg	0	2.23442	0.92	0.651	0	Endothelial Cell	Ptprg
Prickle21	0	2.22722	0.41	0.048	0	Endothelial Cell	Prickle2
Emcn	0	2.20942	0.344	0.003	0	Endothelial Cell	Emcn
Rnf220	0	2.19916	0.334	0.036	0	Endothelial Cell	Rnf220
Tcf42	0	2.19279	0.89	0.482	0	Endothelial Cell	Tcf4
Hspa12b	0	2.19012	0.387	0.007	0	Endothelial Cell	Hspa12b
Sptbn11	0	2.16759	0.938	0.666	0	Endothelial Cell	Sptbn1
Dock41	0	2.16443	0.664	0.239	0	Endothelial Cell	Dock4
Sgms11	0	2.16164	0.803	0.364	0	Endothelial Cell	Sgms1
Cd300lg	0	2.14899	0.381	0.001	0	Endothelial Cell	Cd300lg
Sncaip	0	2.14718	0.321	0.004	0	Endothelial Cell	Sncaip
Bcl2l1	0	2.14512	0.471	0.116	0	Endothelial Cell	Bcl2l1
Hpcal11	0	2.14048	0.359	0.032	0	Endothelial Cell	Hpcal1
Afdn	0	2.13783	0.676	0.217	0	Endothelial Cell	Afdn
Elk3	0	2.12945	0.38	0.009	0	Endothelial Cell	Elk3
Prag1	0	2.11644	0.319	0.002	0	Endothelial Cell	Prag1
Plcb4	0	2.079	0.938	0.659	0	Endothelial Cell	Plcb4
Nova2	0	2.0769	0.373	0.001	0	Endothelial Cell	Nova2
App2	0	2.07314	0.528	0.101	0	Endothelial Cell	App
Efr3b	0	2.07035	0.285	0.002	0	Endothelial Cell	Efr3b
Mef2c1	0	2.03272	0.45	0.03	0	Endothelial Cell	Mef2c
Akt32	0	2.03262	0.42	0.034	0	Endothelial Cell	Akt3
Zbtb461	0	2.02662	0.532	0.141	0	Endothelial Cell	Zbtb46
Plxna2	0	2.02448	0.651	0.251	0	Endothelial Cell	Plxna2
Rapgef1	0	2.02394	0.703	0.298	0	Endothelial Cell	Rapgef1
Adarb1	0	2.0069	0.405	0.066	0	Endothelial Cell	Adarb1
Psd32	0	1.98966	0.681	0.224	0	Endothelial Cell	Psd3
Nxpe4	0	1.98264	0.339	0.013	0	Endothelial Cell	Nxpe4
Tspan91	0	1.9736	0.369	0.039	0	Endothelial Cell	Tspan9
Timp31	0	1.97161	0.494	0.067	0	Endothelial Cell	Timp3
Tspan13	0	1.97	0.326	0.002	0	Endothelial Cell	Tspan13
Rasgrf2	0	1.96889	0.35	0.023	0	Endothelial Cell	Rasgrf2
Cmip2	0	1.95493	0.435	0.052	0	Endothelial Cell	Cmip
Fyn1	0	1.94446	0.34	0.032	0	Endothelial Cell	Fyn
AU020206	0	1.92649	0.313	0.006	0	Endothelial Cell	AU020206
Dock91	0	1.92444	0.789	0.372	0	Endothelial Cell	Dock9
Arap3	0	1.91905	0.353	0.001	0	Endothelial Cell	Arap3
Coro2b1	0	1.9033	0.337	0.02	0	Endothelial Cell	Coro2b
Kalrn1	0	1.90285	0.361	0.036	0	Endothelial Cell	Kalrn
Cdh23	0	1.89628	0.309	0.002	0	Endothelial Cell	Cdh23
Rcsd11	0	1.89489	0.302	0.022	0	Endothelial Cell	Rcsd1
Crim1	0	1.89369	0.488	0.107	0	Endothelial Cell	Crim1
Rapgef3	0	1.88362	0.342	0.01	0	Endothelial Cell	Rapgef3
Kank3	0	1.87218	0.33	0.002	0	Endothelial Cell	Kank3
Tie1	0	1.87019	0.333	0.001	0	Endothelial Cell	Tie1
Hdac71	0	1.85206	0.361	0.025	0	Endothelial Cell	Hdac7
Podxl	0	1.84656	0.281	0	0	Endothelial Cell	Podxl
Sh2d3c	0	1.84437	0.308	0.004	0	Endothelial Cell	Sh2d3c
Efnb2	0	1.84243	0.265	0.005	0	Endothelial Cell	Efnb2
Myo1e	0	1.83301	0.314	0.035	0	Endothelial Cell	Myo1e
Hspg21	0	1.8294	0.561	0.159	0	Endothelial Cell	Hspg2
Srgap22	0	1.82588	0.536	0.155	0	Endothelial Cell	Srgap2
Ppm1h1	0	1.82569	0.328	0.023	0	Endothelial Cell	Ppm1h
Evl	0	1.81293	0.256	0.006	0	Endothelial Cell	Evl
Pde2a	0	1.80583	0.343	0.026	0	Endothelial Cell	Pde2a
Rasip1	0	1.79294	0.313	0.001	0	Endothelial Cell	Rasip1
Wipf12	0	1.78974	0.385	0.045	0	Endothelial Cell	Wipf1
Cd200	0	1.77959	0.268	0.002	0	Endothelial Cell	Cd200
Sash12	0	1.77438	0.494	0.134	0	Endothelial Cell	Sash1
Sp1002	0	1.77369	0.325	0.023	0	Endothelial Cell	Sp100
Arhgef15	0	1.7699	0.305	0.001	0	Endothelial Cell	Arhgef15
Klf2	0	1.74873	0.273	0.003	0	Endothelial Cell	Klf2
Ccnd32	0	1.74323	0.341	0.054	0	Endothelial Cell	Ccnd3
Fmnl3	0	1.73588	0.314	0.008	0	Endothelial Cell	Fmnl3
Flnb	0	1.73254	0.42	0.097	0	Endothelial Cell	Flnb
Nedd91	0	1.71555	0.29	0.027	0	Endothelial Cell	Nedd9
Rhoj1	0	1.67464	0.397	0.049	0	Endothelial Cell	Rhoj
Serinc31	0	1.66621	0.391	0.068	0	Endothelial Cell	Serinc3
Gpihbp1	0	1.6598	0.255	0.001	0	Endothelial Cell	Gpihbp1
Cald11	0	1.63361	0.31	0.037	0	Endothelial Cell	Cald1
Ltbp4	0	1.63322	0.265	0.005	0	Endothelial Cell	Ltbp4
Rgs3	0	1.6095	0.314	0.042	0	Endothelial Cell	Rgs3
Id1	0	1.6068	0.277	0.021	0	Endothelial Cell	Id1
Esam	0	1.59813	0.262	0.005	0	Endothelial Cell	Esam
S1pr1	0	1.59719	0.267	0.001	0	Endothelial Cell	S1pr1
Sgk1	0	1.56925	0.253	0.006	0	Endothelial Cell	Sgk1
Grb101	0	1.53589	0.287	0.04	0	Endothelial Cell	Grb10
Ablim1	0	1.52817	0.954	0.79	0	Endothelial Cell	Ablim1
Trim25	0	1.52703	0.293	0.042	0	Endothelial Cell	Trim25
Cpne8	0	1.52503	0.257	0.02	0	Endothelial Cell	Cpne8
Jcad	0	1.51722	0.257	0.007	0	Endothelial Cell	Jcad
Plxnd1	0	1.48513	0.285	0.031	0	Endothelial Cell	Plxnd1
Tmtc1	0	1.46762	0.256	0.03	0	Endothelial Cell	Tmtc1
Myo1b	0	1.44623	0.366	0.044	0	Endothelial Cell	Myo1b
Stard91	0	1.38185	0.256	0.02	0	Endothelial Cell	Stard9
Ptk21	1.18298e-296	1.81502	0.642	0.253	2.15042e-292	Endothelial Cell	Ptk2
Tmcc32	8.7979e-292	2.08491	0.676	0.29	1.59928e-287	Endothelial Cell	Tmcc3
Dock6	2.72378e-290	1.34692	0.311	0.055	4.95129e-286	Endothelial Cell	Dock6
Ptprm	1.93896e-276	1.26653	0.974	0.894	3.52464e-272	Endothelial Cell	Ptprm
Maml22	1.3216e-275	1.78707	0.613	0.224	2.40241e-271	Endothelial Cell	Maml2
Lrch12	5.60585e-271	1.77695	0.464	0.133	1.01903e-266	Endothelial Cell	Lrch1
Fnbp1l	1.0108e-267	1.37799	0.269	0.046	1.83744e-263	Endothelial Cell	Fnbp1l
Tanc22	9.59323e-267	1.48005	0.279	0.049	1.74386e-262	Endothelial Cell	Tanc2
Hip11	2.59406e-263	1.73142	0.428	0.115	4.71548e-259	Endothelial Cell	Hip1
Plcb1	1.78526e-262	2.22818	0.689	0.327	3.24525e-258	Endothelial Cell	Plcb1
Prkd2	3.44691e-262	1.35766	0.272	0.047	6.2658e-258	Endothelial Cell	Prkd2
Pxn	4.39331e-262	1.33894	0.277	0.049	7.98616e-258	Endothelial Cell	Pxn
Ext12	1.39814e-258	1.74303	0.849	0.562	2.54154e-254	Endothelial Cell	Ext1
Ppp1r2	1.66745e-255	1.46667	0.344	0.077	3.03109e-251	Endothelial Cell	Ppp1r2
Rgl11	2.26235e-254	1.54097	0.378	0.091	4.11251e-250	Endothelial Cell	Rgl1
Wasf22	4.90142e-251	1.71285	0.552	0.202	8.9098e-247	Endothelial Cell	Wasf2
Xdh1	4.34339e-249	1.9022	0.524	0.184	7.89541e-245	Endothelial Cell	Xdh
Dab2ip	7.38645e-238	1.64217	0.444	0.136	1.34271e-233	Endothelial Cell	Dab2ip
Tjp1	8.34816e-232	1.62492	0.493	0.171	1.51753e-227	Endothelial Cell	Tjp1
Arhgef31	9.0617e-232	1.61805	0.38	0.1	1.64724e-227	Endothelial Cell	Arhgef3
Sec14l1	2.01086e-223	1.37309	0.343	0.084	3.65534e-219	Endothelial Cell	Sec14l1
Cavin2	2.54026e-218	1.50374	0.381	0.106	4.61769e-214	Endothelial Cell	Cavin2
Filip1	3.69495e-218	1.29976	0.252	0.047	6.71669e-214	Endothelial Cell	Filip1
Npr1	1.97808e-216	1.22783	0.276	0.056	3.59576e-212	Endothelial Cell	Npr1
Exoc6	1.33818e-212	1.61858	0.436	0.142	2.43254e-208	Endothelial Cell	Exoc6
Rapgef2	7.8524e-205	1.54038	0.756	0.474	1.42741e-200	Endothelial Cell	Rapgef2
B2m1	3.19985e-203	1.54458	0.285	0.065	5.81669e-199	Endothelial Cell	B2m
Ica1	1.24072e-202	1.43704	0.281	0.063	2.25538e-198	Endothelial Cell	Ica1
Csgalnact11	5.53263e-202	1.54784	0.28	0.061	1.00572e-197	Endothelial Cell	Csgalnact1
Zfp608	2.94043e-201	1.61801	0.365	0.104	5.34511e-197	Endothelial Cell	Zfp608
Igf1r2	5.19238e-198	1.64247	0.488	0.179	9.4387e-194	Endothelial Cell	Igf1r
Fryl1	1.37249e-197	1.58901	0.617	0.299	2.49492e-193	Endothelial Cell	Fryl
Hecw2	1.57123e-195	1.41937	0.306	0.075	2.85618e-191	Endothelial Cell	Hecw2
Tcf7l11	4.08173e-189	1.43058	0.52	0.202	7.41977e-185	Endothelial Cell	Tcf7l1
Dst	9.22283e-187	1.35651	0.754	0.463	1.67653e-182	Endothelial Cell	Dst
Msn1	5.09636e-182	1.36829	0.325	0.089	9.26416e-178	Endothelial Cell	Msn
Eepd1	6.54404e-179	1.50711	0.4	0.133	1.18958e-174	Endothelial Cell	Eepd1
Wwtr11	8.28394e-177	1.51546	0.552	0.249	1.50585e-172	Endothelial Cell	Wwtr1
Itga1	1.00165e-175	1.48848	0.624	0.322	1.8208e-171	Endothelial Cell	Itga1
Stox2	8.4897e-173	1.8733	0.689	0.428	1.54326e-168	Endothelial Cell	Stox2
Sh3rf1	1.26954e-170	1.63277	0.44	0.163	2.30777e-166	Endothelial Cell	Sh3rf1
Myh92	1.87805e-167	1.34385	0.429	0.157	3.41392e-163	Endothelial Cell	Myh9
Pls3	9.48309e-167	1.31155	0.269	0.067	1.72384e-162	Endothelial Cell	Pls3
Tmod3	7.1857e-166	1.48998	0.416	0.151	1.30622e-161	Endothelial Cell	Tmod3
Map42	1.41928e-162	1.26021	0.458	0.176	2.57996e-158	Endothelial Cell	Map4
Zswim62	5.01622e-148	1.54422	0.516	0.243	9.11848e-144	Endothelial Cell	Zswim6
Actb1	3.39994e-147	1.57559	0.337	0.112	6.18041e-143	Endothelial Cell	Actb
Ppfibp11	1.56896e-145	1.23953	0.338	0.111	2.85205e-141	Endothelial Cell	Ppfibp1
Spred21	3.57877e-143	1.38664	0.47	0.202	6.5055e-139	Endothelial Cell	Spred2
Ehd2	5.51777e-141	1.11571	0.287	0.084	1.00302e-136	Endothelial Cell	Ehd2
Syne1	1.56486e-138	1.37027	0.581	0.318	2.8446e-134	Endothelial Cell	Syne1
Trio1	4.12047e-136	1.33089	0.653	0.401	7.4902e-132	Endothelial Cell	Trio
Tbc1d22a	9.40333e-135	1.40385	0.475	0.221	1.70934e-130	Endothelial Cell	Tbc1d22a
Lmo7	2.33724e-132	1.38896	0.428	0.181	4.24864e-128	Endothelial Cell	Lmo7
Smad1	3.39174e-132	1.32744	0.313	0.104	6.16551e-128	Endothelial Cell	Smad1
Ankrd441	6.69086e-128	1.28788	0.465	0.213	1.21627e-123	Endothelial Cell	Ankrd44
Zbtb161	1.47938e-126	1.27035	0.736	0.501	2.68922e-122	Endothelial Cell	Zbtb16
Tjp2	1.43738e-124	1.10241	0.256	0.075	2.61288e-120	Endothelial Cell	Tjp2
Xiap1	2.99738e-124	1.35211	0.535	0.288	5.44863e-120	Endothelial Cell	Xiap
Lnx2	9.25042e-123	1.26897	0.294	0.098	1.68154e-118	Endothelial Cell	Lnx2
Cavin1	3.53687e-122	1.17799	0.309	0.106	6.42932e-118	Endothelial Cell	Cavin1
Map4k3	3.16525e-121	1.29591	0.639	0.409	5.75379e-117	Endothelial Cell	Map4k3
Ncoa31	1.13873e-120	1.35863	0.33	0.12	2.06999e-116	Endothelial Cell	Ncoa3
Ptpn122	1.14512e-120	1.28074	0.458	0.216	2.08159e-116	Endothelial Cell	Ptpn12
Ctnna1	4.87929e-120	1.2454	0.544	0.298	8.86958e-116	Endothelial Cell	Ctnna1
Ccny	8.5992e-120	1.27612	0.58	0.342	1.56316e-115	Endothelial Cell	Ccny
Arhgef28	2.09232e-116	1.19638	0.669	0.44	3.80343e-112	Endothelial Cell	Arhgef28
Ttc7b	1.29269e-115	1.21551	0.519	0.277	2.34986e-111	Endothelial Cell	Ttc7b
Inpp5a1	8.58743e-114	1.21523	0.445	0.207	1.56102e-109	Endothelial Cell	Inpp5a
Prex2	2.17546e-110	0.962101	0.806	0.632	3.95456e-106	Endothelial Cell	Prex2
Shroom4	5.78958e-110	1.14406	0.315	0.117	1.05243e-105	Endothelial Cell	Shroom4
Luzp1	8.78199e-110	1.23619	0.476	0.241	1.59639e-105	Endothelial Cell	Luzp1
Epas1	1.04884e-108	1.18502	0.639	0.419	1.90658e-104	Endothelial Cell	Epas1
Yes1	8.32323e-108	1.23508	0.383	0.169	1.513e-103	Endothelial Cell	Yes1
Dock13	1.2541e-107	1.09571	0.638	0.409	2.2797e-103	Endothelial Cell	Dock1
[truncated: 1,387 more rows]

## Sheet: iBAT-adipocytes
	p_val	avg_log2FC	pct.1	pct.2	p_val_adj	cluster	gene
[truncated: 966 more rows]

## Sheet: iBAT-ASPC
	p_val	avg_log2FC	pct.1	pct.2	p_val_adj	cluster	gene
[truncated: 602 more rows]

[truncated: 7 more sheets: lPRAT, lPRAT-Adipocytes, lPRAT-ASPC, lPRAT-macrophage, iWAT, iWAT-adipocytes, iWAT-ASPC]
