# Supplementary figures and images for: Perirenal adipose tissue contains a subpopulation of cold-inducible adipocytes derived from brown-to-white conversion
Source: eLife journal article supplement (doi:10.7554/elife.93151), 2024-01-05

Figure 4C

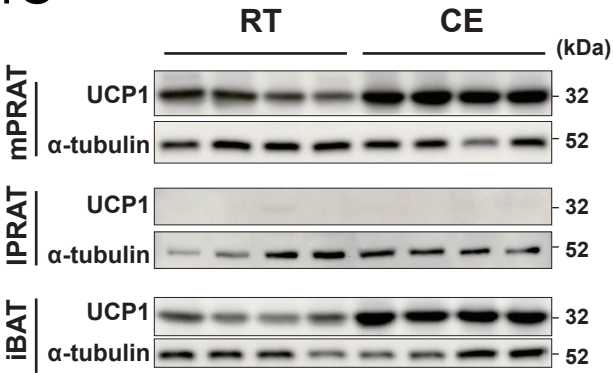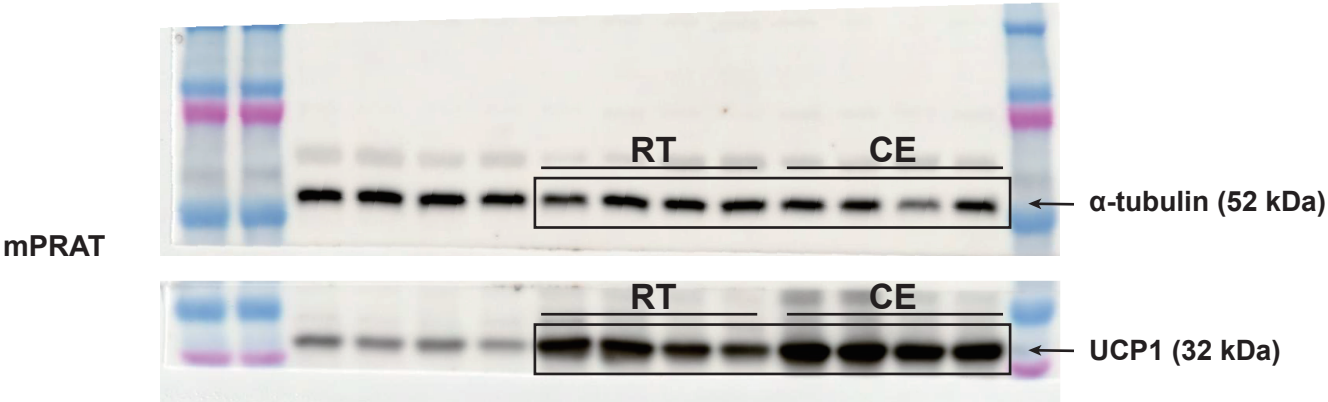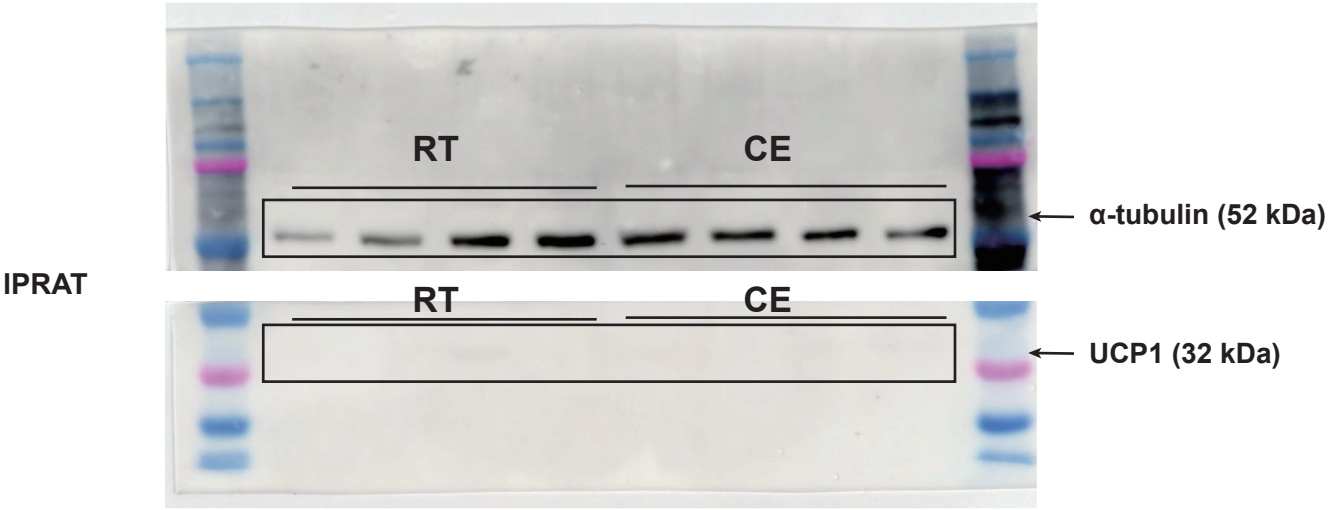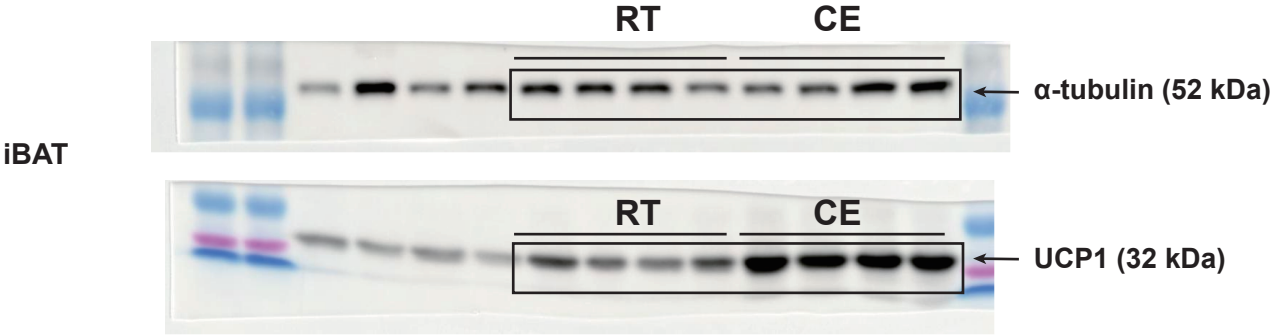

Supplement: fig4-data2 [file elife-93151-fig4-data2-v1.zip]
